# Supplementary material for: Analysis of Environmental Variables and Carbon Input on Soil Microbiome, Metabolome and Disease Control Efficacy in Strawberry Attributable to Anaerobic Soil Disinfestation
Source: Microorganisms. 2021 Jul 31;9(8):1638. doi: 10.3390/microorganisms9081638 (PMC8401821; doi:10.3390/microorganisms9081638)
Supplement: Supplementary file 1 [file microorganisms-09-01638-s001.zip › Hewavitharana et al. 2021_Supplementary Material_Soil Metabolome Data_S2.xlsx]

## Sheet: Polar-metabolites-GR
	DAY0						DAY1						DAY3						DAY7						DAY15						DAY21						DAY24						DAY28						DAY31
[Results Signal 1]	ASDNA1	ASDNA2	ASDNA3	ASDGR1	ASDGR2	ASDGR3	ASDNA1	ASDNA2	ASDNA3	ASDGR1	ASDGR2	ASDGR3	ASDNA1	ASDNA2	ASDNA3	ASDGR1	ASDGR2	ASDGR3	ASDNA1	ASDNA2	ASDNA3	ASDGR1	ASDGR2	ASDGR3	ASDNA1	ASDNA2	ASDNA3	ASDGR1	ASDGR2	ASDGR3	ASDNA1	ASDNA2	ASDNA3	ASDGR1	ASDGR2	ASDGR3	ASDNA1	ASDNA2	ASDNA3	ASDGR1	ASDGR2	ASDGR3	ASDNA1	ASDNA2	ASDNA3	ASDGR1	ASDGR2	ASDGR3	ASDNA1
	0NA1	0NA2	0NA3	0GR1	0RG2	0RG3	1NA1	1NA2	1NA3	1GR1	1GR2	1GR3	3NA1	3NA2	3NA3	3GR1	3GR2	3GR3	7NA1	7NA2	7NA3	7GR1	7GR2	7GR3	15NA1	15NA2	15NA3	15GR1	15GR2	15GR3	21NA1	21NA2	21NA3	21GR1	21GR2	21GR3	24NA1	24NA2	24NA3	24GR1	24GR2	24GR3	28NA1	28NA2	28NA3	28GR1	28GR2	28GR3	31NA1
(Tris(trimethylsilyl)borate)	0	31864.3	0	64575	66169	40926.6	0	72888.6	40763.4	96725.7	34364.6	104255	21072.4	40261	0	44328.5	30454.4	31458.9	59963.3	33503.3	0	53198.8	51019.4	24033.6	0	41018.6	0	23666.8	101531	37475.6	0	102673	41628.1	44903.3	74659.1	0	22592.7	27874.9	54465.2	48431.7	51395	36086.1	30763.6	48793.9	51953.2	27302.4	0	25841.7	60446.7
RI=1004.1, 6.4805 min 081816032	0	0	0	0	0	0	0	0	0	0	0	0	0	0	0	0	0	0	0	0	0	0	0	0	0	0	0	0	0	0	0	0	0	0	0	0	0	0	0	0	0	0	0	0	0	0	0	0	0
(oxalic acid)	0	0	0	0	34583.8	0	0	0	0	782355	239753	611438	0	0	0	52601.8	511755	707084	0	0	0	1.18463e+06	310071	940225	0	0	0	0	1.63006e+06	161003	0	0	0	709192	107256	662623	0	0	0	216467	324388	35945.3	0	0	0	0	0	56100	0
Pyruvic acid (methoxamine, tms derivati	0	0	0	481596	202107	81633.9	0	55715.6	0	1.31249e+06	409162	1.04997e+06	0	0	0	98397.2	889481	1.1865e+06	0	18745.1	0	128125	122894	295609	0	0	0	0	156368	99092.2	0	0	0	249391	236899	164842	0	23717.5	0	106959	750502	67828.3	0	0	0	0	0	64134	0
RI=1065.4, 7.0213 min 081816023	81695.5	282565	0	525716	780643	329458	58448.4	38395.9	35499.8	3.37561e+06	4.84515e+06	1.72003e+07	0	0	0	73255.5	2.96823e+06	3.6517e+06	27637.9	19917.7	0	1.18474e+06	309604	56270	0	105048	0	11182.8	1.64982e+06	111576	0	0	0	708758	42840.4	746847	0	0	0	679030	1.83579e+06	91589.8	0	38402.3	29646.9	74483.4	0	88627.6	67226.1
(Lactic acid)	67231.2	247716	0	470556	678008	275968	53821.7	0	28523.1	2.96533e+06	4.24433e+06	1.48542e+07	0	0	0	70031.6	119125	137602	25468.2	17144.2	0	33169.8	24042.1	0	11776.4	94652.7	11776.4	0	66765.5	76510.3	0	0	0	71115.4	85449.2	306590	10141.9	0	17516.2	168553	418521	27779.2	0	0	28278.4	66994.6	23029.2	0	55980.8
Hexanoic acid, trimethylsilyl ester	0	50397.8	0	52953.8	121407	69081.1	22554	42164.8	0	424193	608449	2.09195e+06	0	0	0	0	173955	222600	0	0	0	67364.7	0	43742.1	0	0	0	0	99044.4	0	0	19682.1	28346.1	43661.8	0	0	0	0	0	0	0	0	0	49556.4	0	0	0	0	0
RI=1090.6, 7.2438 min 081816023	0	0	0	76990.8	71603	39324.3	0	0	0	34369	0	81347.5	0	0	0	20998.5	40612.1	0	0	0	0	24839.5	0	0	0	0	0	0	36253	32480.3	0	0	0	0	29175.7	34398.1	0	0	0	24052.5	43362.2	0	0	0	0	0	0	0	0
Butanoic acid, 2-(methoxyimino)-, trime	0	0	87002	105628	102935	71882.4	31195.9	42051.5	0	56066.7	0	130427	0	62081.6	0	0	63314.8	0	116927	0	32775	86606.1	59743.5	66375	31413.8	26686.8	31413.8	0	168712	193514	0	39141.3	0	183424	222676	783136	0	24303.7	0	436411	1.05357e+06	67524.2	20374.2	25910	47632.2	0	23653.9	48371.1	0
l-Alanine, N-(trimethylsilyl)-, trimeth	0	0	0	0	0	0	0	0	0	0	0	0	0	0	0	0	0	0	0	0	0	0	0	0	0	0	0	0	0	0	0	0	0	0	0	0	0	0	0	0	0	0	0	0	0	0	0	0	0
RI=1123.1, 7.5311 min 082616028	0	0	0	4683.46	6935.9	0	0	0	0	0	0	0	0	0	0	0	28935.1	49304.3	0	0	0	0	0	0	0	0	0	0	32478.2	0	0	0	0	0	0	0	0	0	0	14292.8	26123.4	0	0	0	0	0	0	0	0
Bis(trimethylsilyl)sarcosine	0	0	0	0	0	0	0	0	0	0	0	0	0	0	0	0	0	0	0	0	0	0	0	0	0	0	0	0	0	0	0	0	0	0	0	0	0	0	0	0	0	0	0	0	0	0	0	0	0
RI=1148.1, 7.7521 min 081816020	0	15555.9	0	68382.4	92650.5	106604	12696	0	0	0	41282.8	0	0	0	0	0	73138	0	0	21656.6	0	134760	38399.9	0	0	0	0	0	85262.8	70783.7	0	0	0	82996.8	46527	213704	0	21448.5	0	134915	193288	0	0	40097.8	34678.8	34195.9	38563	0	0
Butanoic acid, 3-[(trimethylsilyl)oxy]-	0	0	0	157936	175203	85656.6	0	0	0	203353	64735.2	274717	0	0	0	0	81121	0	0	0	0	111710	32389.9	0	0	0	0	0	86816.1	56049.7	0	0	0	66097.6	36546.6	180967	0	0	0	110330	273657	0	0	0	0	22433	0	27916.1	0
(heptanoic acid tms)	0	0	0	50198.8	81805.1	0	0	0	18758	192430	31790.6	194883	0	0	0	0	51539.7	71316.7	0	0	0	36128.4	24079.6	309866	0	0	0	0	84185.9	187716	0	0	0	28782.2	56757.6	214704	0	0	0	215191	395140	66478.4	0	0	0	0	0	65928	0
RI=1171.8, 7.9612 min 081816023	0	0	0	0	0	0	0	0	0	25544	0	56728.6	0	0	0	29227.9	226191	110687	0	0	0	112325	56200.3	41929.5	0	0	0	0	54000.1	0	0	0	0	0	0	0	0	0	0	0	33696.5	0	0	0	0	0	0	0	0
RI=1181.4, 8.0458 min 082616033	0	14155.6	0	50695.8	66958.2	0	0	0	0	16076.7	0	42297.6	0	0	0	27426	43863.5	136769	0	0	0	34417.5	30090.5	620481	0	0	0	0	113857	270839	0	0	0	76722.1	83053	309836	0	0	0	297263	541127	66809.1	0	0	0	21640.9	25734	54546.4	0
RI=1193.6, 8.1534 min 082316005	0	0	0	0	0	0	0	0	0	0	0	0	0	0	0	0	0	0	0	0	0	0	0	58415.3	0	0	0	0	0	0	0	0	0	0	0	0	0	0	0	0	0	0	0	0	0	0	0	0	0
(N,O-Bis(trimethylsilyl)hydroxylamine)	0	138696	55136.5	495926	690861	311154	51648.8	58662.5	46473.5	186078	106093	222220	103850	99716	98710.1	255878	492851	1.62047e+06	193521	20937.2	35031.8	0	0	6.99817e+06	131453	32097.4	131453	23173.6	0	646110	60271.6	69479	0	0	22757.2	480340	85883.9	112390	0	526251	1.00243e+06	277676	90585.4	119968	82072.8	222480	272408	224652	40418.1
RI=1202.7, 8.2316 min 081816023	0	0	0	0	0	0	0	0	0	0	0	0	0	0	0	0	0	0	0	0	0	0	0	0	0	0	0	0	0	0	0	0	0	0	0	0	0	0	0	0	0	0	0	0	0	0	0	0	0
Malonic acid (tms derivative)	0	154942	56666.3	213765	293115	135185	52650.4	58343.7	50958.2	201056	121018	418104	110020	105056	97666.8	271657	513120	1.76577e+06	216178	0	31763	102991	68513.1	7.9172e+06	137031	31095	137031	22200.2	103007	520017	56084.6	75562	27908	81671.7	100651	263089	88916.8	121173	58558.4	339530	678071	260828	96298.9	128901	86979.4	233863	289240	220815	43104.2
RI=1213.7, 8.3215 min 081816032	0	0	0	140824	227387	104205	0	0	0	15451	29189.8	62488.9	0	0	0	0	0	0	0	0	0	0	0	0	0	0	0	0	34432.8	36667.8	0	0	0	16400.8	0	27265.8	0	0	0	43964.3	53430.7	110308	0	0	0	0	0	107418	0
L-Valine, N-(trimethylsilyl)-, trimethy	0	0	0	487407	688690	316233	0	1900.27	0	33310.2	99181.3	214891	0	0	0	0	0	0	0	0	0	0	0	0	0	0	0	0	39401.6	35412.6	0	0	0	0	22215.4	35594.4	0	0	0	55114.7	60738.8	99985.1	0	0	0	0	0	93751.6	0
RI=1239.9, 8.5343 min 081816023	0	0	0	0	0	0	0	0	0	0	0	32602.9	0	0	0	13703.4	52849	0	0	0	0	12473.9	0	0	0	0	0	0	0	0	0	0	0	0	0	0	0	0	0	0	0	0	0	0	0	0	0	0	0
Norvaline (2TMS)	0	0	0	0	0	0	0	0	0	0	0	0	0	0	0	0	0	0	0	0	0	0	0	0	0	0	0	0	0	0	0	0	0	0	0	0	0	0	0	0	0	0	0	0	0	0	0	0	0
(EIQTMS_N12C_ATHL_1249.2_3161BN29_[917;	0	38948.9	0	99934.2	76663.5	95070.9	80040.6	231562	65928.2	69890.1	45162.1	0	0	19444.4	27295.4	39400.2	61052.9	36208.8	0	44201.1	0	35009.4	26803.6	0	0	92348.6	0	0	0	204135	0	65579.2	102291	37686.5	34784.8	35797.8	0	36566.3	65621.3	57603.3	47922.4	32900.2	0	261546	28091.1	17674.4	56928.5	31361.8	61988.9
Benzoic acid trimethylsilyl ester	0	0	0	0	0	0	0	0	0	0	0	0	0	0	0	0	0	0	0	0	0	0	0	0	0	0	0	0	0	0	0	0	0	0	0	0	0	0	0	0	0	0	0	0	0	0	0	0	0
RI=1258.3, 8.6844 min 081816029	0	0	0	100949	0	40115.6	0	0	0	0	0	0	0	0	0	0	0	0	29311	0	0	0	0	46371.5	0	17058.1	0	0	58542.2	41300.9	0	0	0	26293.9	35382.9	51488.8	0	0	0	42174.2	88817.2	36750.5	0	0	0	0	0	0	0
(octanoic acid)	3839.32	0	0	396840	715049	0	809.57	9428.87	0	0	59312.1	213402	0	0	0	0	21273.8	0	0	10372.1	0	53093.4	34034.2	12235.7	4815.89	16786.1	4815.89	0	47964.9	17111.7	0	2052.48	29704.6	0	0	43828.9	0	0	36952.9	2762.49	65431.5	5998.55	0	0	4761.9	0	27683.9	9075.05	0
Pipecolic acid (TMS)	0	0	0	0	0	0	0	0	0	0	0	0	0	0	0	0	0	0	0	0	0	0	0	0	0	0	0	0	0	0	0	0	0	0	0	0	0	0	0	0	0	0	0	0	0	0	0	0	0
L-Leucine, N-(trimethylsilyl)-, trimeth	0	0	0	0	0	0	0	0	0	0	0	0	0	0	0	0	0	0	0	0	0	0	0	0	0	0	0	0	0	0	0	0	0	0	0	0	0	0	0	0	0	0	0	0	0	0	0	0	0
Trimethylsilyl ether of glycerol	0	0	0	0	0	0	0	0	0	0	0	0	0	0	0	0	0	0	0	0	0	0	0	0	0	0	0	0	0	0	0	0	0	0	0	0	0	0	0	0	0	0	0	0	0	0	0	0	0
Phosphoric acid (tms derivative)	0	0	0	0	0	0	0	0	0	0	0	0	0	0	0	0	0	0	0	0	0	0	0	0	0	0	0	0	0	0	0	0	0	0	0	0	0	0	0	0	0	0	0	0	0	0	0	0	0
L-Isoleucine, N-(trimethylsilyl)-, trim	0	0	0	0	0	0	0	0	0	0	0	0	0	0	0	0	0	0	0	0	0	0	0	0	0	0	0	0	0	0	0	0	0	0	0	0	0	0	0	0	0	0	0	0	0	0	0	0	0
(Nicotinic acid-TMS)	0	0	0	0	0	0	0	0	0	0	0	0	0	0	0	0	0	0	0	0	0	0	0	0	0	0	0	0	0	0	0	0	0	0	0	0	0	0	0	0	0	0	0	0	0	0	0	0	0
L-Proline, 1-(trimethylsilyl)-, trimeth	0	0	0	0	0	0	0	0	0	0	0	0	0	0	0	0	0	0	0	0	0	0	0	0	0	0	0	0	0	0	0	0	0	0	0	0	0	0	0	0	0	0	0	0	0	0	0	0	0
(benzylacetic acid)	0	0	0	149356	412204	0	0	0	0	60907.5	39668.6	107151	0	0	0	150517	111381	85757.2	28792.1	0	0	818644	952616	704387	0	30698.3	0	0	2572619	2.63922e+06	0	0	22690.9	1.00854e+06	604242	1.93612e+06	42576.3	0	130120	2.56965e+06	3.90703e+06	603313	0	0	0	0	47914.6	618976	0
Maleic acid (2TMS)	176970	237742	183269	2.3695e+07	3.08013e+07	1.38274e+07	177258	380932	262534	554735	4.79675e+06	1.26001e+07	208861	264143	175865	462632	255402	383389	536343	248332	137992	387502	263771	307797	181417	350101	181417	181192	321443	387598	138764	514074	201727	209904	187052	236822	150716	189147	259147	360821	683402	514047	243661	280865	438281	317217	346203	400079	222456
Glycine, N,N-bis(trimethylsilyl)-, trim	0	0	0	76002	94607.6	61873.5	0	0	0	0	0	38253.5	0	0	0	0	0	0	0	0	0	0	0	0	0	0	0	0	0	0	0	0	0	0	0	0	0	0	0	0	0	0	0	0	0	0	0	0	0
Succinic acid (tms derivative)	0	0	0	0	0	0	0	0	0	0	0	0	0	0	0	0	0	0	0	0	0	0	0	58259.5	0	0	0	0	28827.8	0	0	0	0	0	0	0	0	0	0	0	0	0	0	0	0	0	0	0	0
(like succinic acid)	0	0	0	0	0	0	0	0	0	0	0	0	0	0	0	0	0	0	0	0	0	0	0	0	0	0	0	0	65454.2	23862.2	0	0	0	0	0	91869.9	0	0	0	0	121729	0	0	0	0	0	0	0	0
Glyceric acid (3TMS)	16869.5	0	0	111824	412149	0	0	0	0	60844.3	51032.3	169180	0	0	11321.2	149367	111581	87537.1	21970.9	0	0	798982	935346	116799	0	30306.2	0	0	2.57236e+06	2.63931e+06	0	0	22875.5	1.0084e+06	602133	1.93542e+06	39652.5	0	130811	2.56986e+06	3.90408e+06	604418	0	0	18558.5	0	47682.5	618644	0
(Pyrimidine, 2,4-bis[(trimethylsilyl)ox	0	0	0	0	0	0	0	0	0	0	0	0	0	0	0	0	0	0	0	0	0	0	0	0	0	0	0	0	0	0	0	0	0	0	0	0	0	0	0	0	0	0	0	0	0	0	0	0	0
Fumaric acid (tms derivative)	0	0	0	0	0	0	0	0	0	0	0	0	0	0	0	0	0	0	0	0	0	0	0	0	0	0	0	0	0	0	0	0	0	0	0	0	0	0	0	0	0	0	0	0	0	0	0	0	0
(nonanoic acid)	0	0	0	46558.9	34054.1	0	0	0	0	0	0	0	0	0	0	0	0	0	0	0	0	29238.2	0	0	23188.8	0	23188.8	0	39324.2	35130.5	0	21405	0	0	0	26015	0	0	25486.8	28877.7	50013.9	0	0	0	19923.9	0	18559	0	0
Serine tritms	0	0	0	675363	808590	387012	0	0	0	33347.8	23074	83746.8	0	0	0	4611.18	236518	402970	13901.6	0	0	34443.4	23793.7	7369.6	0	0	0	0	251283	113349	0	0	0	26335.9	35163.8	349196	3221.92	0	25649.3	82279.5	476456	65943.4	3523.61	0	1914.83	0	0	57798.2	1131.5
Pipecolic acid (2TMS)	0	0	0	0	0	0	0	0	0	0	0	0	0	0	0	0	0	0	0	0	0	0	0	0	0	0	0	0	0	0	0	0	0	0	0	0	0	0	0	0	0	0	0	0	0	0	0	0	0
RI=1371.9, 9.5687 min 082616028	0	0	0	0	0	0	0	0	0	0	0	0	0	0	0	0	0	0	0	0	0	0	0	0	0	0	0	0	0	0	0	0	0	0	0	0	0	0	0	0	0	0	0	0	0	0	0	0	0
RI=1384.6, 9.6650 min 081816023	0	0	0	0	0	0	0	0	0	0	0	0	0	0	0	24441.4	22905	27068.5	0	0	0	22528.3	18664.5	28052.4	0	0	0	0	32959.6	42309.2	0	0	0	0	0	44156.9	0	0	0	53035.2	51219.9	34128.3	0	0	0	0	0	30706.9	0
RI=1389.9, 9.7052 min 082316015	0	0	0	0	0	0	0	0	0	0	0	0	0	0	0	0	0	0	0	0	0	0	0	0	0	0	0	0	0	0	0	0	0	0	0	0	0	0	0	0	0	0	0	0	0	0	0	0	0
N,O,O-Tris(trimethylsilyl)-L-threonine	0	14818.1	8307.42	23332.4	16590.8	0	0	0	16796	19411.9	0	33028.9	0	0	0	0	27012.6	29670.4	21519.7	0	0	34824.5	0	32720.1	12736.8	0	12736.8	0	57270.2	38298	0	18904.1	0	0	0	0	0	12358.3	26559.4	46184.2	73567.1	0	16813.5	0	0	0	13545.8	29460.6	0
4-methylcatechin	0	0	0	0	1706.79	26818.9	0	34433.5	0	8816.08	0	13428.3	0	0	0	0	24903.5	22175.3	0	0	0	0	0	26098.2	0	0	0	0	25453.7	0	0	0	19274.8	0	0	21803.6	0	0	0	29032.9	39185.9	0	0	39113	0	0	0	0	0
Glutaric acid (2TMS)	0	0	0	0	0	0	0	0	0	0	0	0	0	0	0	0	0	0	0	0	0	0	0	0	0	0	0	0	0	17083	0	0	0	0	0	0	0	0	0	0	0	0	0	0	0	0	0	0	0
(Hydrocinnamic acid, trimethylsilyl est	0	0	0	0	36796.7	0	0	0	0	0	0	0	0	0	0	0	0	0	0	0	0	0	0	0	0	12894.9	0	0	120019	52304.4	0	0	0	187306	44699.4	150808	0	0	0	1.9188e+06	679278	24839.8	0	0	0	0	0	26171.2	0
B-alanine (3TMS)	0	0	0	0	0	0	0	0	0	0	0	0	0	0	0	0	0	0	0	0	0	0	0	0	0	0	0	0	0	0	0	0	0	0	0	0	0	0	0	0	0	0	0	0	0	0	0	0	0
(Mandelic acid (ditms))	0	0	0	0	46800.7	0	0	0	0	21158.8	0	0	0	0	0	0	0	34304.8	0	0	0	0	0	28430	0	0	0	0	73762.9	28790.6	0	0	0	74178.9	29059.9	74336.6	0	0	0	811642	303893	0	0	0	0	0	0	0	0
Erythrose peak 1 (TMSoxime)	0	0	0	28240.7	48459.7	22092.6	0	0	0	0	11055.9	18531.7	0	0	0	0	0	0	0	0	0	0	0	0	0	0	0	0	0	0	0	0	0	0	0	0	0	0	0	41227.4	0	0	0	0	0	0	0	0	0
L-Homoserine, tris(trimethylsilyl) deri	0	0	0	0	0	0	0	0	0	0	0	0	0	0	0	0	0	0	0	0	0	0	0	0	0	0	0	0	0	0	0	0	0	0	0	0	0	0	0	0	0	0	0	0	0	0	0	0	0
(decanoic acid TMS)	0	0	0	35784.9	44858.5	0	0	0	0	0	0	0	0	0	0	0	0	0	0	0	0	0	0	0	0	0	0	0	0	0	0	0	0	0	0	0	0	0	0	0	0	0	0	0	0	0	0	0	0
Erythrose, O-methyloxime, tris-O-(trime	0	0	0	0	33537.7	0	0	0	0	20824.7	0	0	0	0	0	0	0	0	0	0	0	0	0	0	0	0	0	0	0	0	0	0	0	0	0	47476.6	0	0	0	778277	253324	0	0	0	0	0	0	0	0
Citramalic acid (?TMS)	0	0	0	0	0	0	0	0	0	0	0	0	0	0	0	0	0	0	0	0	0	0	0	0	0	0	0	0	0	0	0	0	0	0	0	0	0	0	0	0	0	0	0	0	0	0	0	0	0
Malic acid (tms derivative)	0	0	0	113675	177177	47780.9	0	0	0	49816.9	38217.7	68090.5	0	0	0	0	0	0	0	0	0	0	0	53872.6	0	0	0	0	138929	64677.3	0	0	0	116195	0	282997	0	0	0	160108	317269	0	0	0	0	0	0	47144.1	0
(Adipic acid)	0	0	0	116303	211367	77745.9	0	0	0	112108	94696.1	279280	0	0	0	235926	934898	223179	0	0	0	1.12958e+06	691800	354712	0	0	0	0	1.98186e+06	859432	0	35744.9	0	696035	296455	1.19006e+06	19160	0	53557.1	1.59231e+06	2.82634e+06	295289	0	0	0	0	0	326663	0
Erythritol (tms derivative)	0	0	0	34929.8	48976.1	0	0	0	0	13524.5	9048.92	24384.3	0	0	0	0	0	4103.53	0	0	0	0	0	0	0	0	0	0	0	0	0	0	0	0	0	56800.6	0	0	0	38810.2	61994.1	0	0	0	0	0	0	0	0
Benzoic acid, 2-[(trimethylsilyl)oxy]-,	0	0	0	0	0	0	0	0	0	0	0	0	0	0	0	0	0	0	0	0	0	0	0	0	0	0	0	0	0	0	0	0	0	0	0	0	0	0	0	0	0	0	0	0	0	0	0	0	0
RI=1521.9, 10.6424 min 081816029	0	0	0	705585	1.03091e+06	468201	0	0	23088.1	424259	244452	726348	0	0	0	94508	350219	193842	0	0	0	422775	263875	122982	0	0	0	0	698961	309932	0	0	0	265214	113566	421068	0	0	23248.6	568298	1.01858e+06	192464	0	0	0	59801.9	0	184697	0
L-Aspartic acid, N-(trimethylsilyl)-, b	0	0	0	0	0	0	0	0	0	733.72	2204.97	5656.92	0	0	0	6331.68	10529	16348.8	0	0	0	157910	93960.7	34622.6	0	0	0	0	280566	41759.4	0	0	0	96014.5	40405.2	40544.5	0	0	0	88289.7	150349	10761.3	0	0	0	0	0	21046.3	0
L-Methionine, N-(trimethylsilyl)-, trim	25337	0	0	1.07223e+06	1.76889e+06	0	0	0	40012	364961	282542	1.11433e+06	0	0	0	284197	1.17659e+06	337859	31574.9	0	0	1.46657e+06	890233	427630	0	0	0	0	2.51913e+06	1.07911e+06	0	55428.1	0	870833	388108	329518	24075.3	0	66022.3	2.01369e+06	3.58427e+06	412078	0	0	0	28413.3	0	463107	0
L-Proline, 5-oxo-1-(trimethylsilyl)-, t	0	0	0	0	0	0	0	0	0	0	0	0	0	0	0	0	28432.2	0	0	0	0	28812.9	0	0	0	0	0	0	56795.6	25594	0	0	0	16603.7	0	29305.5	0	0	0	44440.8	70594.5	0	0	0	0	0	0	0	0
Hydroxyproline (tms derivative)	0	0	0	0	0	0	0	0	0	0	0	0	0	0	0	0	0	0	0	0	0	0	0	0	0	0	0	0	0	0	0	0	0	0	0	0	0	0	0	0	0	0	0	0	0	0	0	0	0
GABA (tritms)	0	0	0	0	0	0	0	0	0	0	0	0	0	0	0	0	0	0	0	0	0	0	0	0	0	0	0	0	0	0	0	0	0	0	0	0	0	0	0	0	0	0	0	0	0	0	0	0	0
Cinnamic acid (TMS)	0	0	0	53346.6	96973.5	35646.7	0	0	0	52335.5	39498.3	120600	0	0	0	92804.4	387172	91328.8	0	0	0	453685	278159	145004	0	0	0	0	832225	352060	0	0	0	279522	124101	499478	0	0	22233.5	657410	1.18087e+06	129446	0	0	0	0	0	128564	0
RI=1551.4, 10.8417 min 082316015	0	0	0	62337.7	41197.7	26103.9	0	0	2802.63	0	0	58725.5	0	0	0	0	0	0	0	0	0	0	22902.6	31257.8	0	0	0	0	0	0	0	0	0	0	0	0	0	0	0	0	0	0	0	0	0	0	0	0	0
Alanine, phenyl-, trimethylsilyl ester,	0	0	0	0	0	0	0	0	0	0	0	0	0	0	0	0	0	0	0	0	0	0	0	0	0	0	0	0	0	0	0	0	0	0	0	0	0	0	0	0	0	0	0	0	0	0	0	0	0
(EIQTMS_N12C_NID1_1542.3_1267BK12_[786;	0	0	0	0	0	0	0	0	0	0	0	0	0	0	0	0	0	0	0	0	0	0	0	0	0	0	0	0	0	0	0	20818.4	0	0	0	0	0	0	0	0	0	0	0	0	0	0	0	0	0
L-Cysteine, N,S-bis(trimethylsilyl)-, t	0	0	0	0	15689.8	0	0	0	0	0	0	5756.79	0	0	0	0	0	0	0	0	0	0	0	0	0	0	0	0	0	0	0	0	0	0	0	0	0	0	0	0	0	0	0	0	0	0	0	0	0
Threonic acid (?TMS)	0	0	0	47840	49248	0	0	0	0	0	0	29074.8	0	0	0	0	0	0	0	0	0	0	0	0	0	0	0	0	0	0	0	0	0	0	0	0	0	0	0	0	0	0	0	0	0	0	0	0	0
2-oxo-glutaric acid (methoximino, ditms	0	0	0	69078.1	118852	42937.6	0	0	0	12339.8	23446.3	60776.5	0	0	0	0	32561.5	0	0	0	0	0	0	41862	0	0	0	0	0	0	0	0	0	0	0	0	0	0	0	0	0	0	0	0	0	0	0	0	0
L-Asparagine, N,N2-bis(trimethylsilyl)-	0	0	0	0	0	0	0	0	0	0	0	0	0	0	0	0	0	0	0	0	0	0	0	0	0	0	0	0	0	0	0	0	0	0	0	0	0	0	0	0	0	0	0	0	0	0	0	0	0
Pimelic acid (2TMS)	0	0	0	118110	149867	54045.3	0	0	0	0	27547.5	65092.4	0	0	0	0	17045.1	20417.9	0	0	0	0	0	0	0	0	0	0	0	0	0	0	0	0	11339.9	0	0	0	0	0	0	0	0	0	0	0	0	0	0
L-Arginine (tms derivative)	0	0	0	24547	36477.8	0	0	0	0	0	0	0	0	0	0	0	0	0	0	0	0	0	0	0	0	0	0	0	0	0	0	0	0	0	0	0	0	0	0	0	0	0	0	0	0	0	0	0	0
Glutamic acid (tms derivative)	0	0	0	0	0	0	0	0	0	0	0	0	0	0	0	0	0	0	0	0	0	0	0	0	0	0	0	0	0	0	0	0	0	0	0	0	0	0	0	0	0	0	0	0	0	0	0	0	0
Benzoic acid, 4-[(trimethylsilyl)oxy]-,	0	0	0	0	0	0	0	0	0	0	0	0	0	0	0	0	0	0	0	0	0	0	0	0	0	0	0	0	0	0	0	0	0	0	0	0	0	0	0	0	0	0	0	0	0	0	0	0	0
RI=1638.1, 11.4122 min 081816032	0	0	0	755.08	0	0	0	0	0	0	0	0	0	0	0	0	0	0	0	0	0	0	0	0	0	0	0	0	0	0	0	0	0	0	0	0	0	0	0	0	0	0	0	0	0	0	0	0	0
N,O-Bis(trimethylsilyl)-L-phenylalanine	0	0	0	0	0	0	0	0	0	0	0	0	0	0	0	0	0	0	0	0	0	0	0	0	0	0	0	0	0	0	0	0	0	0	0	0	0	0	0	0	0	0	0	0	0	0	0	0	0
(p-Hydroxyphenylacetic acid (tms))	0	31842.7	0	184457	260845	34268.5	0	0	0	29928.5	0	37073.2	0	0	0	101408	26235.7	50813.4	44935.5	0	0	0	0	576989	28343.6	0	28343.6	0	0	75030	0	0	0	0	0	48495.1	0	0	0	56764.2	133705	56034.6	0	28418.7	0	48377	54543.7	49369.7	0
Dodecanoic acid (TMS)	0	0	0	0	0	10606.2	0	0	0	0	0	0	0	0	0	0	0	0	0	0	0	0	0	0	0	0	0	0	0	0	0	0	0	0	0	0	0	0	0	0	0	0	0	0	0	0	0	0	0
Tartaric acid, bis-O-(trimethylsilyl)-,	0	0	0	61132.1	73919.8	0	0	0	0	0	0	0	0	0	0	0	0	0	0	0	0	0	0	0	0	0	0	0	0	0	0	0	0	0	0	0	0	0	0	0	0	0	0	0	0	0	0	0	0
d-Xylose peak 1 (tms, methoxamine deriv	0	5571.29	0	185609	240036	0	0	0	0	0	0	34068.7	0	0	1936.03	0	0	0	41.14	0	0	0	0	344194	0	0	0	0	0	0	0	0	0	0	0	5019.7	0	0	0	0	61154.6	0	0	0	0	0	0	0	0
Arabinose (methoxamino, tms derivative)	0	32281.8	0	182233	213101	122309	0	0	0	54613.8	22140.3	64688	22121.6	19900.7	0	100701	0	53655.7	53219.4	0	0	0	0	579196	35055	0	35055	0	7549.13	73446.8	0	0	0	0	6819.48	48999.9	0	26191.1	0	57054.6	132450	55389.4	21981.5	28311.2	0	46568.4	56951.7	50613.6	0
d-Ribose, 2,3,4,5-tetrakis-O-(trimethyl	0	32283.8	0	746031	1.21515e+06	320284	0	0	0	85858.4	162551	232829	22127.1	18340.2	0	100697	0	53648.4	39852.2	0	0	0	0	572212	31206.5	0	31206.5	0	66913.8	73485.5	0	0	0	0	0	50806.7	0	25851.2	0	57028.6	132405	55925.8	20756.9	28292.9	0	46575.1	56918.9	50919	0
RI=1717.4, 11.9122 min 081816029	0	0	0	181254	215588	114826	0	0	0	0	26501.9	33316.7	0	0	0	0	0	0	0	0	0	0	0	0	0	0	0	0	276748	35336.2	0	0	0	30514.1	0	0	0	0	0	0	0	0	0	0	0	0	0	0	0
(dithioerythritol??)	0	0	0	2.15596e+06	3.30983e+06	1.59053e+06	0	0	0	47197.7	369281	474585	0	0	0	0	0	0	27513.1	0	0	28933.8	0	25920.2	0	0	0	0	349539	74213.3	0	0	0	0	0	354942	0	0	0	21445.2	1.02736e+06	0	0	0	0	72068.1	27828	0	0
RI=1733.1, 12.0073 min 081816029	0	0	0	1.49649e+06	2.33624e+06	1.1342e+06	0	0	0	40390.1	248254	316101	0	0	0	0	0	0	0	0	0	0	0	0	0	0	0	0	0	0	0	0	0	0	0	0	0	0	0	0	0	0	0	0	0	46593.4	20391.8	0	0
Rhamnose peak 1(TMSoxime)	0	0	0	172999	208297	101434	0	0	0	0	28369.3	44961.6	0	0	0	0	0	0	0	0	0	0	0	0	0	0	0	0	0	0	0	0	0	0	0	0	0	0	0	0	0	0	0	0	0	0	0	0	0
Arabinitol/Xylitol	0	0	0	2.66373e+06	3.21441e+06	1.51602e+06	0	0	0	29971.1	340372	511982	0	0	0	0	0	30831.4	0	0	0	0	0	0	0	0	0	0	284917	28335.3	0	0	0	0	0	0	0	0	0	0	0	0	0	0	0	0	0	0	0
Rhamnose peak 2 (TMSoxime)	0	0	0	0	0	940510	0	0	0	0	0	0	0	0	0	0	0	0	25035.8	0	0	0	0	0	0	0	0	0	350324	72943.3	0	0	0	0	0	356237	0	0	0	0	1.02524e+06	0	0	0	0	0	0	0	0
Adonitol (TMSoxime)	0	0	0	684209	641984	560874	0	0	0	0	124614	124630	0	0	0	0	0	0	0	0	0	0	0	0	0	0	0	0	0	0	0	0	0	0	0	0	0	0	0	0	0	0	0	0	0	0	0	0	0
Putrescine (4TMS)	0	0	0	37912.2	43637.6	21614.7	0	0	0	0	0	0	0	0	0	0	0	0	0	0	0	0	0	0	0	0	0	0	0	0	0	0	0	0	0	0	0	0	0	0	0	0	0	0	0	0	0	0	0
Fucose peak 1 (TMSoxime)	0	0	0	656834	725600	397014	0	0	0	0	66261.2	154621	0	0	0	0	0	0	0	0	0	0	0	0	0	0	0	0	62314.9	7215.26	0	0	0	0	0	38590	0	0	0	0	70833.5	0	0	0	0	0	0	0	0
RI=1750.8, 12.1140 min 081816029	0	0	0	882443	321622	709192	0	0	0	24234.8	142408	146579	0	0	0	0	0	0	0	0	0	0	0	0	0	0	0	0	24852	0	0	0	0	0	0	0	0	0	0	0	61710.6	0	0	0	0	31156.8	0	0	0
cis-Aconitic acid (3TMS)	0	0	0	0	0	0	0	0	0	0	0	0	0	0	0	0	0	0	0	0	0	0	0	0	0	0	0	0	0	0	0	0	0	0	0	0	0	0	0	0	0	0	0	0	0	0	0	0	0
RI=1754.9, 12.1394 min 082316005	0	33820	14345.5	475250	992091	556550	0	0	0	52461.2	260192	328968	25638.8	13946.3	0	138139	0	0	40688.1	0	0	23431.5	0	141511	24314	0	24314	0	155452	78988.4	0	0	0	0	0	354355	19971.1	26940	0	0	264445	48107.8	17748.5	0	0	70268.2	27926.6	0	0
(Hydrocinnamic acid, p-(trimethylsiloxy	0	0	0	0	0	0	0	0	0	0	0	0	0	0	0	0	0	0	0	0	0	33074.7	28854.5	37075.8	0	0	0	0	314699	98646.9	0	0	0	0	23414.1	274107	0	0	0	0	550026	0	0	0	0	0	0	0	0
Glycerol 3-phosphate (4TMS)	0	0	0	884508	1.36571e+06	703774	0	0	0	0	141418	181505	0	0	0	0	0	0	0	0	0	0	0	0	0	0	0	0	0	0	0	0	0	0	0	0	0	0	0	0	63248.6	0	0	0	0	31742.5	0	0	0
(Arabinofuranose, 1,2,3,5-tetrakis-O-(t	0	0	0	68090.2	90648.4	72592.6	0	0	0	38452.7	31721.3	72094.1	0	0	0	0	0	27675.3	0	0	0	87211.5	72382.8	0	0	0	0	0	87896.2	0	0	0	0	0	0	4171.18	0	0	0	0	8467.54	700.86	0	0	0	0	0	0	0
RI=1797.6, 12.3974 min 081816023	0	0	0	279548	307700	0	0	0	0	173662	140688	360326	0	0	0	27400	66884	116439	0	0	0	114898	86276.8	71447.3	0	0	0	0	108027	37303.9	0	0	0	0	0	41051.7	0	0	0	39832.3	77602.1	0	0	0	0	0	0	0	0
RI=1799.4, 12.4084 min 082616028	0	0	0	130235	204850	83785.7	0	0	0	0	25565.3	77461.9	0	0	0	28288.8	47247.3	89468.1	7717.06	0	0	96703.9	76873.3	59497.8	0	0	0	0	98222.2	30230.1	0	0	0	0	0	29101	0	0	0	30928.8	65678	0	0	0	0	0	0	0	0
(EIQTMS_N12C_NID1_1774.7_1248BK08_[920;	0	0	0	617114	246321	731851	0	0	0	39673	29115.4	58137.8	0	0	0	0	0	34731.1	0	0	0	29672.9	19461.6	0	0	0	0	0	34970.1	0	0	0	0	0	0	0	0	0	0	0	29688.3	0	0	0	0	0	0	0	0
Shikimic acid (tms derivative)	0	0	0	0	0	0	0	0	0	0	0	0	0	0	0	0	0	0	0	0	0	0	0	0	0	0	0	0	19855.1	0	0	0	0	0	0	0	0	0	0	0	21942.4	0	0	0	0	0	0	0	0
3-phospoglyceric acid (TMS)	0	0	0	0	0	0	0	0	0	0	0	0	0	0	0	0	0	0	0	0	0	0	0	0	0	0	0	0	0	0	0	0	0	0	0	0	0	0	0	0	0	0	0	0	0	0	0	0	0
RI=1826.5, 12.5650 min 082316015	0	0	0	104845	139369	0	0	0	0	0	0	0	0	0	0	0	0	0	0	0	0	0	0	0	0	0	0	0	0	0	0	0	0	0	0	0	0	0	0	0	0	0	0	0	0	0	0	0	0
L-Ornithine, N2,N5,N5-tris(trimethylsil	0	0	0	33263.8	47602.5	27249.3	0	0	0	0	0	23502	0	0	0	0	0	0	0	0	0	0	0	0	0	0	0	0	0	0	0	0	0	0	0	0	0	0	0	0	14551	0	0	0	0	0	0	0	0
Isocitric acid (tms derivative)	0	0	0	617795	247389	729067	0	0	0	39983.1	28908.5	59202	0	0	0	0	0	34606.1	0	0	0	29597	16269.6	0	0	0	0	0	35372.1	0	0	0	0	0	0	0	0	0	0	0	29115.6	0	0	0	0	0	0	0	0
Citric acid (tms derivative)	0	0	0	651897	1.10673e+06	438527	0	0	0	173809	138707	206636	0	0	0	0	58551.3	30401	0	0	0	95276.4	72695.5	63972.2	0	0	0	0	95600.2	15579.4	0	0	0	0	0	14510.6	0	0	0	18043.1	58652.5	0	0	0	0	0	0	0	0
(EIQTMS_N12C_SCA_1852.6_3147BF23_[931;	0	0	0	592110	661492	41823.7	0	0	0	0	0	0	0	0	0	0	0	15292.1	0	0	0	0	0	0	0	0	0	0	0	0	0	0	0	0	0	0	0	0	0	27400.1	29627.1	0	0	0	0	0	0	0	0
RI=1852.7, 12.7162 min 081816012	0	0	0	1.54692e+06	2.46547e+06	5.18024e+06	0	0	0	970447	1.41968e+06	3.88613e+06	0	0	0	0	499624	1.57489e+06	0	0	0	0	0	0	0	0	0	0	0	0	0	0	0	0	0	0	0	0	0	0	0	0	0	0	0	0	0	0	0
Pinitol (TMS)	0	0	0	40284.3	58021.5	0	0	0	0	0	0	0	0	0	0	0	0	0	0	0	0	0	0	0	0	0	0	0	0	0	0	0	0	0	0	0	0	0	0	0	0	0	0	0	0	0	0	0	0
Quinic acid (tms derivative)	0	0	0	0	0	0	0	0	0	21715.4	35502.3	83330.8	0	0	0	0	0	33711.4	0	0	0	0	0	0	0	0	0	0	0	0	0	0	0	0	0	0	0	0	0	0	0	0	0	0	0	0	0	0	0
D-Fructose, 1,3,4,5,6-pentakis-O-(trime	0	0	0	8.89359e+06	1.37925e+07	1.4997e+06	0	0	0	69218.1	0	0	0	0	0	0	129504	126528	0	0	0	75125.6	22684.5	0	0	0	0	0	0	0	0	0	0	0	0	0	0	0	0	0	0	0	0	0	0	0	0	0	0
(EIQTMS_N12C_ATHL_1898.3_3038BN25_[908;	0	0	0	2.1678e+06	2.89356e+06	1.73603e+06	0	0	0	50576.1	408351	313263	0	0	0	0	0	48759.2	0	0	0	35419.9	36277.1	44300.4	0	0	0	0	48112.2	94936	0	33517.9	0	0	48324.8	34026.7	0	0	0	27286.5	66240.5	0	0	0	0	0	0	42084.8	0
d-Glucose, 2,3,4,5,6-pentakis-O-(trimet	0	0	0	1.04678e+08	1.22488e+08	8.70379e+07	0	0	0	342430	1.75308e+07	2.60764e+07	0	0	0	0	2.22201e+06	3088946	74203.1	0	0	1.31101e+06	366218	225369	0	0	0	20768.7	56748.5	56969.8	0	0	0	0	67826.8	36784.2	0	0	0	0	0	51352.9	0	0	0	0	0	0	0
L-Lysine, N2,N6,N6-tris(trimethylsilyl)	0	0	0	1.10326e+06	1.30594e+06	726977	0	0	0	0	130238	199307	0	0	0	0	0	0	0	0	0	0	0	0	0	0	0	0	0	0	0	0	0	0	0	0	0	0	0	0	0	0	0	0	0	0	0	0	0
Cinnamic acid, p-(trimethylsiloxy)-, tr	0	0	0	159417	187823	174113	0	0	0	0	59854.3	90838.8	0	0	0	0	0	0	0	0	0	0	0	0	0	0	0	0	0	0	0	0	0	0	0	0	0	0	0	0	0	0	0	0	0	0	0	0	0
L-Tyrosine, N,O-bis(trimethylsilyl)-, t	0	0	0	4.00094e+06	1.0525e+06	8.53334e+06	0	0	0	0	1.11627e+06	1.60183e+06	0	0	0	0	0	0	0	0	0	0	0	0	0	0	0	0	0	0	0	0	0	0	0	0	0	0	0	0	29014.2	0	0	0	0	0	0	26266.9	0
D-Mannitol, 1,2,3,4,5,6-hexakis-O-(trim	0	0	0	6.88624e+07	7.56901e+07	4.89592e+06	0	0	0	166230	497381	803160	0	0	0	0	91000.7	150841	66299.2	0	0	126696	97296.7	0	0	0	0	81830.7	163701	204989	0	42828.2	0	99748.6	235921	149201	0	0	0	130615	384035	124165	0	0	0	0	180118	379059	0
Sorbitol (tms derivative)	0	0	0	5.01658e+07	5.51663e+07	4.81772e+07	0	0	0	130764	346611	594102	0	0	0	0	69471.8	123620	46141.4	0	0	85370	67612.4	0	0	0	0	61488	120361	141767	0	33801.9	0	76391.7	161324	107814	0	0	0	95698.4	276642	91009.1	0	0	0	0	128118	267712	0
L-Ascorbic acid, 2,3,5,6-tetrakis-O-(tr	0	0	0	7.76077e+07	7.98803e+07	7.18916e+07	0	0	0	240035	702049	1.38401e+06	0	0	0	0	143081	233800	96549.5	0	0	179322	152624	27825	0	0	0	125678	257132	305089	0	70752.6	0	155126	355028	220722	0	0	0	201378	184516	170217	0	0	0	0	278418	563761	0
(EIQTMS_N12C_SD2_1997.2_3237BF23_Galact	0	0	0	962574	1.32649e+06	644856	0	0	0	646882	276696	754821	0	0	0	0	267761	486262	0	0	0	102138	0	0	0	0	0	0	121573	175695	0	23834.8	0	0	48166.4	77458.4	0	0	0	76582.2	158144	34785.7	0	0	0	0	24454.2	141783	0
(another inositol??)	0	0	0	1.57479e+06	2.17582e+06	972093	0	0	0	1.04179e+06	458572	1.21705e+06	0	0	0	28149.1	457598	784932	0	0	0	0	53581.1	32021.3	0	0	0	0	0	0	0	0	0	15358.8	0	64944.3	0	0	0	50528.5	0	0	0	0	0	0	0	0	0
Pantothenic acid, O,O,O-tris(trimethyls	0	0	0	1.04331e+06	1.45678e+06	881303	0	0	0	0	0	36672.7	0	0	0	0	15195.1	24015.5	0	0	0	0	0	0	0	0	0	0	0	0	0	0	0	0	0	0	0	0	0	0	14051.6	0	0	0	0	0	0	0	0
RI=2009.8, 13.5921 min 081816029	0	0	0	0	21227.5	0	0	0	0	0	0	0	0	0	0	0	0	0	0	0	0	0	0	0	0	0	0	0	0	0	0	0	0	0	0	0	0	0	0	0	0	0	0	0	0	0	0	0	0
D-Gluconic acid, 2,3,4,5,6-pentakis-O-(	0	0	0	1.5351e+06	2.16479e+06	967814	0	0	0	960712	408641	1.21519e+06	0	0	0	24425.4	457334	782821	0	0	0	0	49915.5	31772.7	0	0	0	0	0	0	0	0	0	0	0	0	0	0	0	0	15291.4	0	0	0	0	0	0	0	0
Hexadecanoic acid, trimethylsilyl ester	0	0	0	0	0	0	0	0	0	0	0	0	0	0	0	0	0	0	0	0	0	0	0	0	0	0	0	0	0	0	0	0	0	0	0	0	0	0	0	0	0	0	0	0	0	0	0	0	0
GSIL67	0	0	0	85544	68697.6	27878	0	0	0	0	0	23702.1	0	0	0	0	0	0	0	0	0	0	0	0	0	0	0	0	0	0	0	0	0	0	0	0	0	0	0	0	0	0	0	0	0	0	0	0	0
scyllo-inositol (6TMS)	0	0	0	505149	414828	203314	0	0	0	69629.7	40891.1	151000	0	0	0	0	54359.8	53570.5	0	0	0	0	0	0	0	0	0	0	0	59846.6	0	0	0	0	0	35266.6	0	0	0	62317	80673.5	0	0	0	0	0	0	63272.4	0
Mucic acid (6TMS)	0	0	0	362558	297883	157914	0	0	0	68123.7	37655.3	203349	0	0	0	0	65544.9	59726.6	0	0	0	0	0	15914.6	0	0	0	0	0	67256	0	24694.5	0	0	0	0	0	0	0	71681.9	93270.4	26227.6	0	0	0	0	0	62752.2	0
Ferulic acid, trimethylsiloxy, trimethy	0	0	0	0	0	0	0	0	0	0	0	0	0	0	0	0	0	0	0	0	0	0	0	0	0	0	0	0	0	0	0	0	0	0	0	0	0	0	0	0	0	0	0	0	0	0	0	0	0
Inositol, 1,2,3,4,5,6-hexakis-O-(trimet	0	0	0	0	0	0	0	0	0	0	0	0	0	0	0	0	0	0	0	0	0	0	0	0	0	0	0	0	0	22055	0	0	0	0	0	0	0	0	0	0	35169.3	0	0	0	0	0	0	0	0
Caffeic acid (3TMS)	0	0	0	13719	0	0	0	0	0	0	0	0	0	0	0	0	0	0	0	0	0	0	0	0	0	0	0	0	0	0	0	0	0	0	0	0	0	0	0	0	0	0	0	0	0	0	0	0	0
Linoleic acid (TMS)	0	69412.1	19737.8	1.25883e+06	1.91389e+06	739101	0	22300.7	0	67273.7	158002	358418	70868.4	20894.5	25121.9	72430.3	0	0	77779.5	0	0	0	0	125010	48019.7	0	48019.7	0	0	47813.9	0	21423.1	0	0	0	33249.2	45654	60277.3	0	0	68124.4	0	31873.5	34686.9	41043.1	0	0	24443.1	0
Oleic acid, trimethylsilyl ester	0	0	0	117725	162010	107164	0	0	0	0	0	0	0	0	0	0	0	0	0	0	0	0	0	0	0	0	0	0	0	0	0	0	0	0	0	0	0	0	0	0	0	0	0	0	0	0	0	0	0
Octadecanoic acid (TMS)	0	0	0	150347	187767	105636	0	0	0	53542.1	0	127019	0	0	0	0	0	0	0	0	0	0	0	0	0	0	0	0	0	0	0	0	0	0	0	0	0	0	0	0	0	0	0	0	0	0	0	0	0
L-Tryptophan, N,1-bis(trimethylsilyl)-,	0	0	0	0	0	0	0	0	0	0	0	0	0	0	0	0	0	0	0	0	0	0	0	0	0	0	0	0	0	0	0	0	0	0	0	0	0	0	0	0	0	0	0	0	0	0	0	0	0
RI=2249.1, 14.8063 min 081816032	0	0	0	141349	135891	71383.1	0	0	0	28509.5	0	61870.5	0	0	0	0	0	0	0	0	0	0	0	0	0	0	0	0	0	0	0	0	0	0	0	0	0	0	0	0	0	0	0	0	0	0	0	0	0
Sinapic acid (TMS)	0	0	0	0	0	0	0	0	0	0	0	0	0	0	0	0	0	0	0	0	0	0	0	0	0	0	0	0	0	0	0	0	0	0	0	0	0	0	0	0	0	0	0	0	0	0	0	0	0
RI=2264.5, 14.8808 min 082316005	0	0	0	120664	149090	49588.7	0	0	0	18890.4	0	0	0	0	0	0	18227	0	0	0	0	0	0	0	0	0	0	0	0	0	0	0	0	0	0	0	0	0	0	0	0	0	0	0	0	0	0	0	0
RI=2269.1, 14.9027 min 082616028	22571.1	16696.5	0	278442	323025	155746	0	57662.6	46820.1	113729	36396.2	96033.6	31585.7	22919.4	26957.3	88701.9	124786	113596	43905.3	44586.2	0	36107.4	34669.9	0	0	33627.8	0	0	49677.2	71641.5	15499.9	79674.6	30257.8	0	0	40204.8	0	0	28793	30885.8	69705.1	0	0	32649.8	0	0	0	0	20100.8
RI=2293.6, 15.0211 min 082616028	0	0	0	135659	167409	63707.8	0	0	0	15186.7	2476.59	32286.5	0	0	0	0	0	0	0	0	0	0	0	0	0	0	0	14449.1	0	0	0	0	0	0	0	0	0	0	0	0	0	0	0	0	0	0	0	0	0
(EIQTMS_N12C_NID1_3140.6_1334BV19_[Diga	0	0	0	409599	97653.6	148786	0	50655.5	0	48143.4	48197.4	33248	0	0	0	17244.5	54485.1	35763.2	0	38928.5	0	0	0	0	0	0	0	15989.3	15634.3	34179	0	65761.2	0	0	0	0	0	0	0	41925.7	52955.7	35564.7	0	0	0	0	0	30088.5	0
BGSIL61	0	0	0	121043	148511	63140.1	0	0	0	0	0	0	0	0	0	0	0	0	0	0	0	0	0	0	0	0	0	0	0	0	0	0	0	0	0	0	0	0	0	0	0	0	0	0	0	0	0	0	0
(EIQTMS_N12C_LJAF_3142.1_2236BN50_[Diga	270744	273856	199886	1.05481e+06	1.32332e+06	657533	332330	612644	604698	519028	146308	559487	150789	452667	141061	549781	417891	689526	546345	505902	261687	255123	212519	498270	247733	305637	247733	180856	376370	743297	213236	1.06388e+06	217873	161742	268719	463003	172345	163271	258998	497934	909084	576311	226388	306375	361010	349298	367346	493773	399143
GSIL84	0	0	0	31574.2	62937.1	0	0	0	0	0	0	16977.7	0	0	0	0	0	0	0	0	0	0	0	0	0	0	0	0	0	0	0	0	0	0	0	0	0	0	0	0	0	0	0	0	0	0	0	0	0
Phenyl Beta-D-Glucopyranoside	0	0	0	502213	707724	293521	0	0	0	89201.1	31582.7	96867.8	0	0	0	0	0	0	0	0	0	0	0	18197.9	0	0	0	0	0	33708.3	0	0	0	0	0	0	0	0	0	34488.1	45614.5	31843	0	0	0	0	0	0	0
RI=2386.9, 15.4545 min 082616028	34393.9	0	0	564014	770104	0	39183.8	19860.6	0	0	0	40944.9	0	19911.8	0	42194.2	0	81821.4	0	0	0	0	13915	50244	19120.5	0	19120.5	0	0	0	0	0	14819.6	0	0	0	22069.2	17624.2	55624.9	0	0	24692.8	25980.5	25019.6	36860.3	37677.2	0	0	26361.6
like (2-O-Glycerol-.alpha.-d-galactopyr	0	0	0	1.1459e+06	1.56058e+06	658619	0	0	0	0	0	0	0	0	0	0	0	0	0	0	0	0	0	0	0	0	0	0	0	0	0	0	0	0	0	0	0	0	0	0	0	0	0	0	0	0	0	0	0
RI=2409.9, 15.5592 min 081816029	0	0	0	617114	945806	374606	0	0	0	223418	85087	186693	0	0	0	0	0	43605.1	0	0	0	55708.4	45136	72599.1	0	0	0	0	189776	336621	0	0	0	0	39680.2	100452	0	0	0	94494	323468	61860.2	0	0	0	0	0	27507	0
RI=2422.3, 15.6142 min 081816029	0	0	0	0	0	0	0	0	0	0	0	0	0	0	0	0	0	0	0	0	0	0	0	0	0	0	0	0	0	0	0	0	0	0	0	0	0	0	0	0	0	0	0	0	0	0	0	0	0
RI=2429.9, 15.6479 min 082616028	0	0	0	621803	981505	376941	0	0	0	234095	84151	186047	0	0	0	0	93217.1	62216.7	0	0	0	53569.4	46935.9	75846.3	0	0	0	0	216851	372938	0	0	0	0	45442.6	120319	0	0	29615.2	97376.4	350628	80939.3	0	0	0	0	0	33329.1	0
Eicosanoic acid (TMS)	0	0	0	0	50927.7	0	0	0	0	0	0	0	0	0	0	0	0	0	0	0	0	0	0	0	0	0	0	0	0	0	0	0	0	0	0	0	0	0	0	0	0	0	0	0	0	0	0	0	0
(Oleanitrile)	0	0	0	0	15851.5	0	0	0	0	0	0	0	0	0	0	0	0	0	0	0	0	0	0	0	0	0	0	0	0	0	0	0	0	0	0	0	0	0	0	0	0	0	0	0	0	0	0	0	0
RI=2522.0, 16.0547 min 081816029	0	0	0	0	0	0	0	0	0	0	0	0	0	0	0	0	0	0	0	0	0	0	0	0	0	0	0	0	0	0	0	0	0	0	0	0	0	0	0	0	0	0	0	0	0	0	0	0	0
RI=2536.5, 16.1169 min 082316015	0	0	0	0	0	0	0	0	0	0	0	0	0	0	0	0	0	0	0	0	0	0	0	0	0	0	0	0	0	0	0	0	0	0	0	0	0	0	0	0	0	0	0	0	0	0	0	0	0
RI=2548.8, 16.1699 min 081816029	0	0	0	176014	297014	134621	0	0	0	103953	31960.8	70321.9	0	0	0	0	0	27683.6	0	0	0	0	0	13806.7	0	0	0	0	0	0	0	0	0	0	0	0	0	0	0	0	0	0	0	9413.84	0	0	0	0	0
Salicin	0	0	0	31103.5	50451.6	21181.6	0	0	0	0	0	0	0	0	0	0	0	0	0	0	0	0	0	0	0	0	0	0	0	0	0	0	0	0	0	0	0	0	0	0	0	0	0	0	0	0	0	0	0
RI=2585.7, 16.3283 min 081816032	0	20655.2	0	113628	161771	51297.4	0	28594	0	40685.9	37489.8	32568.5	0	0	0	0	0	24173.3	0	0	0	0	0	33496.5	0	0	0	0	0	33377.8	0	0	0	0	0	0	0	0	0	0	30004.8	0	0	24676	17135.9	0	0	0	17392
RI=2597.7, 16.3802 min 082616028	0	14940.7	0	87314.9	117986	35531.2	0	17023.5	0	25022.6	0	32481.2	0	0	0	0	0	0	0	0	0	0	0	0	0	0	0	0	0	34439.4	0	22163.3	0	0	0	12745.2	11544.7	0	0	0	29848.3	0	0	27101.5	24717.9	13448.8	0	13639.5	0
Arbutin (5TMS)	0	0	0	808085	1.24273e+06	230979	0	24091.2	0	81850	57356.8	138423	0	0	0	0	0	0	0	0	0	0	0	48791.6	0	0	0	0	0	229033	0	0	0	0	0	0	0	0	0	0	3371.46	52145.9	0	0	0	0	0	0	0
RI=2633.6, 16.5264 min 082316005	0	0	0	0	0	0	0	0	0	0	0	0	0	0	0	0	0	0	0	0	0	0	0	0	0	0	0	0	0	0	0	0	0	0	0	0	0	0	0	0	0	0	0	0	0	0	0	0	0
(EIQTMS_N12C_ATHL_1852.4_3161BN34_Dehyd	0	0	0	22340.9	23475.7	0	0	0	0	0	0	0	0	0	0	0	0	0	0	0	0	0	0	0	0	0	0	0	0	0	0	0	0	0	0	0	0	0	0	0	0	0	0	0	0	0	0	0	0
RI=2653.3, 16.6066 min 082316015	0	0	0	0	0	0	0	0	0	0	0	0	0	0	0	0	0	0	0	0	0	0	0	0	0	0	0	0	0	0	0	0	0	0	0	0	0	0	0	0	0	0	0	0	0	0	0	0	0
(EIQTMS_N12C_SD1_2650.9_3223BF23_Adenos	0	0	26042.3	0	0	0	0	10863.1	18208.6	0	0	0	25910.2	18481.1	0	78604	0	51874.5	0	0	0	18970.1	25144.5	0	0	0	0	16379.5	20914.7	0	0	0	0	0	0	0	0	27367.2	38314.9	0	0	61583.8	0	9003.54	66854.9	38293.1	34364.2	0	0
RI=2679.8, 16.7139 min 082316015	0	0	0	0	0	0	0	0	0	0	0	0	0	0	0	0	0	0	0	0	0	0	0	0	0	0	0	0	0	0	0	0	0	0	0	0	0	0	0	0	0	0	0	0	0	0	0	0	0
Sucrose (tms derivative)	28234.4	0	0	27968.7	40762	0	0	0	0	25720.8	0	0	41363.8	0	9130.57	50751.5	0	38462.8	0	0	0	0	0	0	0	0	0	0	0	0	0	0	0	0	0	0	0	0	0	0	0	45452.8	0	19323.8	63765.6	32110	0	0	0
RI=2724.7, 16.8963 min 081816023	0	0	0	224209	272192	75639.4	0	0	0	21717.6	0	27044.1	0	0	0	0	0	0	0	0	0	0	0	0	0	0	0	0	0	0	0	0	0	0	0	0	0	0	0	0	0	0	0	0	0	0	0	0	0
(deoxyribose 3TMS?)	0	0	0	288522	107880	207454	0	0	0	47576.6	0	38091.1	0	0	0	36420.8	26455.4	0	0	0	0	0	0	0	0	0	0	0	0	0	0	0	0	0	0	0	0	0	0	0	0	0	0	0	0	0	0	0	0
Phloretin	0	18210.5	0	158311	227912	67527.4	8799.35	14288.6	16802.2	185098	111747	222885	0	11881.3	0	37086.5	932.71	8669.46	34341.2	14922.1	0	0	0	0	0	0	0	16912.9	0	24216.4	0	982.95	0	0	0	0	11393	0	27554.7	0	30576.2	33537.5	19290.6	29797.8	0	27405.5	16743.2	25227.1	20512.9
(1-Monooleoylglycerol trimethylsilyl et	0	0	0	134450	334080	105112	0	0	0	61577.2	0	40547	0	0	0	0	0	0	0	0	0	0	0	0	0	0	0	0	0	0	0	0	0	0	0	0	0	0	0	0	0	0	0	0	0	0	0	11606.2	0
(EIQTMS_N12C_OARPLAS_2783.6_3350DF06_[9	0	32431.8	0	181707	240572	76654.7	21410.7	36519.4	42188	61681.5	0	65428.3	0	23867.7	0	28984.7	25012.1	28719.1	58152.9	26181	0	0	0	35290.7	23223.4	37016.6	23223.4	0	0	52044.1	0	60786	0	0	0	25779.2	0	22951.5	26525.8	28523.9	60419.1	32743.9	0	44761.9	44398.5	32648.8	27750.6	29819.8	26311
D-Turanose peak1 (heptakis tms)	21753.5	26451	18200.8	1.59142e+06	1.94401e+06	853668	23800.7	23204.5	37607.3	423069	119417	247375	0	28148.7	0	70864.3	19788.3	39170.4	48713.2	29754.4	15763.8	0	0	25497.3	0	21727.5	0	20692.4	17297.4	37858.2	23248.2	39277	13642.3	0	0	26015.8	26434.5	20705.1	32786.1	28581.9	48373.6	54257.9	27699.9	33754.7	57045.7	32351.5	31158.2	37917.4	30619.2
RI=2816.8, 17.2657 min 082616028	4.0797e+06	3.77943e+06	3.81223e+06	1.66831e+07	2.0335e+07	1.01554e+07	3.91731e+06	8.32229e+06	5.65009e+06	9.03332e+06	1.78417e+06	7.63292e+06	3.20813e+06	5.36182e+06	2.05508e+06	1.79172e+07	6.28305e+06	1.23581e+07	7812491	5.38497e+06	2.09217e+06	4.26397e+06	2.80053e+06	404840	3.19347e+06	3.89999e+06	3.19347e+06	8.08245e+06	4.71449e+06	6.83344e+06	2.58329e+06	7.64941e+06	2.44536e+06	792932	1.97334e+06	2.84603e+06	3.1345e+06	4.4168e+06	5.1606e+06	7.49586e+06	1.51587e+07	2.62659e+07	3.53351e+06	5.87459e+06	9.12902e+06	1.05659e+07	1.50661e+07	2.09143e+07	5.30745e+06
RI=2850.8, 17.3950 min 081816029	0	0	0	0	0	0	0	0	0	0	0	0	0	0	0	0	0	0	0	0	0	0	0	0	0	0	0	0	0	0	0	0	0	0	0	0	0	0	0	0	0	0	0	0	0	0	0	0	0
RI=2873.4, 17.4811 min 081816029	9488.85	0	0	746442	617320	407257	0	5969.82	15323.4	45351	80227.9	183604	0	0	0	16798.4	25850.8	0	0	19503.1	0	0	0	0	0	0	0	0	0	13748.1	0	0	0	0	0	0	0	0	0	0	23534.3	0	0	0	28549.8	0	0	0	7590.36
RI=2944.9, 17.7528 min 081816029	16254.1	0	0	2.08385e+06	3.15072e+06	1.22072e+06	12868.8	0	0	58086.9	37453.7	58207.3	24886.8	0	0	38750.7	0	55381.8	0	0	16942.8	0	0	0	0	0	0	0	0	0	0	0	0	0	0	0	0	0	0	0	0	38797.5	0	0	29718.4	0	15549.5	0	0
RI=2968.9, 17.8440 min 081816029	73890.7	19008.8	0	254936	380717	1.18545e+06	28301	15811.5	0	56129.6	18636.4	71397	78100.1	6079.78	0	96432.7	20200.4	160074	33807.8	9367.57	35564.2	0	0	13176.9	35652.3	0	35652.3	37200.7	0	32574.9	26876.8	0	0	0	0	26060.4	0	28569.7	0	5542.13	36577.4	113317	36218.6	0	87556	44316	46662.9	52656.7	16214.7
GSIL135	0	0	0	2.0799e+06	3.12724e+06	1.17894e+06	0	0	0	49897.2	27866.5	57540.6	25108.7	0	0	38917.9	0	58941.6	0	0	0	0	0	0	0	0	0	0	0	0	0	0	0	0	0	0	0	0	0	0	0	37306	0	0	26285.7	0	0	0	0
RI=3011.1, 18.0102 min 082316015	27014.7	0	0	0	0	0	27303.9	0	21744.8	0	23216.8	18716.6	7850.52	11733.5	0	12595	17584.7	14132.5	22838.8	28913.5	0	20809.5	0	23014.5	0	0	0	0	0	0	0	0	0	0	0	0	17503.5	36526.6	27887.9	22512.8	21533	0	41267.5	0	27434	0	8385.79	0	10402.4
GSIL136	0	0	0	23758.8	25530.8	0	0	0	0	0	0	0	0	0	0	0	0	0	0	0	0	0	0	0	0	0	0	0	0	0	0	0	0	0	0	0	0	0	0	0	0	0	0	0	0	0	0	0	0
GSIL137	56622.2	3845.89	0	246369	371738	87499.6	0	0	21747.9	0	13713.3	0	0	19849.8	20138.2	8576.27	11508.5	14351	0	13930	0	23596.2	0	23458.7	0	25706.2	0	0	13394.8	11697.5	0	0	0	0	0	26671.3	0	22559.5	0	23877.3	14165.2	9193.38	15053.3	0	21386.7	0	0	0	11833.5
5'-Adenylic acid, pentakis(trimethylsil	0	0	0	0	0	0	0	0	0	0	0	0	0	0	0	0	0	0	0	0	0	0	0	0	0	0	0	0	0	0	0	0	0	0	0	0	0	0	0	0	0	0	0	0	0	0	0	0	0
Chlorogenic acid (tms derivative)	0	0	0	0	0	0	0	0	0	0	0	0	0	0	0	0	0	0	0	0	0	0	0	0	0	0	0	0	0	0	0	0	0	0	0	0	0	0	0	0	0	0	0	0	0	0	0	0	0
Quercetin (TMS)	33599.6	0	2465.78	635238	152593	0	30088.7	0	0	0	10811.9	0	0	0	0	30691.3	0	26922.7	7235.45	43344.2	0	0	0	0	0	0	0	0	0	0	0	0	0	0	0	0	15801.7	43638.7	0	0	0	0	0	25552.6	8113.21	0	20893.5	0	15887.7
Raffinose (TMS)	0	0	0	0	0	0	0	0	0	0	0	0	0	0	0	0	0	0	0	0	0	0	0	0	0	0	0	0	0	0	0	0	0	0	0	0	0	0	0	0	0	0	0	0	0	0	0	0	0
RI=3509.5, 20.2103 min 082616028	0	0	0	460133	882632	388014	0	0	0	41916.2	0	24556.9	0	0	0	0	0	0	0	0	0	0	0	0	0	0	0	0	0	0	0	0	0	0	0	0	0	0	249250	0	0	0	0	0	0	0	0	0	0
Phloridzin (TMS)	0	0	0	0	0	0	0	0	0	0	0	0	0	0	0	0	0	0	0	0	0	0	0	0	0	0	0	0	0	0	0	0	0	0	0	0	0	0	0	0	0	0	0	0	0	0	0	0	0
RI=3520.8, 20.3033 min 081816029	0	0	0	332279	885687	221749	0	0	0	31042.8	0	0	0	0	0	0	0	0	0	0	0	0	0	0	0	0	0	0	0	0	0	0	0	0	0	0	0	0	0	0	0	0	0	0	0	0	0	0	0
RI=3532.5, 20.3991 min 081816029	0	0	0	0	48276.7	0	0	0	0	0	0	0	0	0	0	0	0	0	0	0	0	0	0	0	0	0	0	0	0	0	0	0	0	0	0	0	0	0	0	0	0	0	0	0	0	0	0	0	0
RI=3564.5, 20.6623 min 081816029	0	0	0	364820	510489	192583	0	0	0	0	22097.9	0	0	0	0	0	0	50982.8	0	0	0	0	0	0	0	0	0	0	0	0	0	0	0	0	0	0	0	0	0	0	0	0	0	0	0	0	0	0	0
RI=3586.0, 20.8389 min 081816029	0	0	0	142991	241304	85888.3	0	0	0	66753.1	32604.8	62327.5	0	0	0	0	0	0	0	0	0	14183.5	13916.5	0	0	0	0	0	15179.2	0	0	0	17025.6	5047.75	10854.1	0	0	0	25393	0	0	0	0	0	0	0	0	0	0
RI=3592.3, 20.8907 min 081816029	58212.6	57800.5	49191.6	146689	276389	104605	51227.5	62632.1	62388.5	74943.3	28891.1	61334.9	69352.2	23523.4	0	85752.4	32928.2	51431.2	108275	28890.8	28276.5	41099.3	44278.8	0	53073.9	43873.7	53073.9	13628.2	40217.7	58177.8	39978.2	54708.6	57439.1	14153.6	36600.5	24979.9	51906.2	44787.7	82330.7	27689.3	54666.1	39472.3	49975	67249.9	59016	0	36914.2	40977.3	64552.7
RI=3604.6, 20.9916 min 081816029	101419	83446.4	67250.9	229720	272175	108869	86768.5	137440	107809	120629	0	84639.4	97592.9	79630.1	37092.2	130021	64490.5	90716	140675	85924.7	50619.9	44321.8	45915.2	0	67243.5	60524.6	67243.5	36138.7	47126.5	96941.5	53148.3	95892	65165.5	0	35512	32941.3	75669.3	84067.4	95715.2	44651	69123.5	56738.8	67780.5	90740.9	161541	23153.4	50251.1	52508.4	100225
RI=3645.0, 21.3234 min 081816029	0	0	0	0	0	0	0	0	0	0	0	0	0	0	0	0	0	0	0	0	0	0	0	0	0	0	0	0	0	0	0	0	0	0	0	0	0	0	0	0	0	0	0	0	0	0	0	0	0
[truncated: 5 more columns]

## Sheet: Polar-metabolites-WH
	DAY0						DAY1						DAY3						DAY7						DAY15						DAY21						DAY24						DAY28						DAY31
[Results Signal 1]	ASDNA1	ASDNA2	ASDNA3	ASDWH1	ASDWH2	ASDWH3	ASDNA1	ASDNA2	ASDNA3	ASDWH1	ASDWH2	ASDWH3	ASDNA1	ASDNA2	ASDNA3	ASDWH1	ASDWH2	ASDWH3	ASDNA1	ASDNA2	ASDNA3	ASDWH1	ASDWH2	ASDWH3	ASDNA1	ASDNA2	ASDNA3	ASDWH1	ASDWH2	ASDWH3	ASDNA1	ASDNA2	ASDNA3	ASDWH1	ASDWH2	ASDWH3	ASDNA1	ASDNA2	ASDNA3	ASDWH1	ASDWH2	ASDWH3	ASDNA1	ASDNA2	ASDNA3	ASDWH1	ASDWH2	ASDWH3	ASDNA1
	0NA1	0NA2	0NA3	0WH1	0WH2	0WH3	1NA1	1NA2	1NA3	1WH1	1WH2	1WH3	3NA1	3NA2	3NA3	3WH1	3WH2	3WH3	7NA1	7NA2	7NA3	7WH1	7WH2	7WH3	15NA1	15NA2	15NA3	15WH1	15WH2	15WH3	21NA1	21NA2	21NA3	21WH1	21WH2	21WH3	24NA1	24NA2	24NA3	24WH1	24WH2	24WH3	28NA1	28NA2	28NA3	28WH1	28WH2	28WH3	31NA1
(Tris(trimethylsilyl)borate)	36636.2	36710.2	0	0	76691.8	75070.6	0	40405	33468.3	94531.5	194064	150830	0	0	17111.2	33574.1	0	0	33596.2	31412.2	0	0	56868.6	25088.8	0	39230.3	44964	43489.9	55408.6	0	35085.5	36665.2	26463.2	0	47963.3	40349.3	38434.5	48060	0	56216.4	101553	41915.5	58192.6	41864.5	0	0	39494.3	27223.9	30726.9
RI=1004.1, 6.4805 min 081816032	0	0	0	0	0	0	0	0	0	0	0	0	0	0	0	0	0	0	0	0	0	0	0	0	0	0	0	0	0	0	0	0	0	0	0	0	0	0	0	0	0	0	0	0	0	0	0	0	0
(oxalic acid)	0	0	0	0	34709.6	0	0	0	0	74568.4	252599	108280	0	0	0	0	56015.6	0	22782	0	0	0	0	47767.1	0	0	0	55128.6	154471	94213.6	0	0	0	0	46608.1	41538.7	0	0	0	78667.2	135178	142465	0	0	0	0	50222	0	0
Pyruvic acid (methoxamine, tms derivati	0	0	0	31516.2	646094	169632	0	0	0	138647	425073	184088	0	0	0	43248.6	109053	0	0	0	0	123505	259120	92490.5	0	0	0	675645	266741	169559	0	0	0	0	457345	152358	0	0	0	90934.4	229684	70099.4	0	0	0	0	31745.8	16156.9	0
RI=1065.4, 7.0213 min 081816023	0	89441.2	0	343799	572910	2.12351e+06	0	0	0	224014	1.41056e+07	144114	0	0	0	0	43176.2	0	15221.8	0	0	45609.2	0	0	0	98226.1	0	64294.4	119429	195261	0	0	0	42758.4	51810.9	63126.1	20038.3	0	0	108367	150896	184981	0	23316	0	45692.7	58511.8	0	0
(Lactic acid)	16179.6	75262.6	21537.9	301732	508091	1.88714e+06	0	0	0	202796	1.22686e+07	130042	0	0	0	0	33326.4	0	0	21835.9	0	24981.2	23225.8	25718.5	0	81818.7	0	51356.3	52332.4	174455	0	0	0	38357.2	46541.3	37971	0	14180.1	11374.8	69120.6	144126	34422.8	12710.7	17616.7	0	39263.1	56665.7	27356.5	0
Hexanoic acid, trimethylsilyl ester	0	0	0	49872.3	62481.3	290234	0	0	0	38306.9	1.71138e+06	0	0	0	0	30794.8	0	0	0	0	0	32064.2	46666.6	25604	0	0	0	91560	89375.9	66377.9	0	0	0	0	91565.7	76057.2	0	0	0	80993.4	101548	66104.5	0	0	0	0	87705.2	0	0
RI=1090.6, 7.2438 min 081816023	0	20029.7	0	36422.9	101300	94808.9	0	0	0	39808.5	67282.2	36314.6	0	0	0	27541	24354.4	0	0	0	0	31475.9	30692.8	16988.8	0	0	0	59022.3	51698.7	58268.6	0	0	0	0	64699.7	66777.3	0	0	0	56853.3	51335.8	0	0	0	0	0	48418.7	14922.5	0
Butanoic acid, 2-(methoxyimino)-, trime	0	0	0	38163.8	108051	95663.8	29608	36114.1	28166.9	68361.1	159630	72302.7	0	51155.9	0	70947.3	30551.5	51001.9	0	0	18455.4	85522.7	56612.9	40112.1	0	0	0	99691.7	134374	88810.8	155172	0	32889.3	0	97188.1	65997.8	43200.6	27326.3	27637.5	170203	49823.8	80747.3	27214.9	0	0	17914.2	113652	0	0
l-Alanine, N-(trimethylsilyl)-, trimeth	0	0	0	0	0	0	0	0	0	0	0	0	0	0	0	0	0	0	0	0	0	0	0	0	0	0	0	0	0	0	0	0	0	0	0	0	0	0	0	0	0	0	0	0	0	0	0	0	0
RI=1123.1, 7.5311 min 082616028	0	0	0	0	0	11817.4	0	0	0	0	29057.9	0	0	0	0	0	0	0	0	0	0	0	27628	0	0	0	0	29761	41860.3	37817.2	0	0	0	0	47519	0	0	0	0	22995.5	42583.3	0	0	0	0	0	23799.2	0	0
Bis(trimethylsilyl)sarcosine	0	0	0	0	0	0	0	0	0	0	0	0	0	0	0	0	0	0	0	0	0	0	0	0	0	0	0	0	0	0	0	0	0	0	0	0	0	0	0	0	0	0	0	0	0	0	0	0	0
RI=1148.1, 7.7521 min 081816020	0	0	0	49922.9	205426	173901	0	0	0	112705	212169	148154	0	0	0	47549.6	35120.2	59289	0	0	0	123217	34234.6	38952.8	0	0	0	137654	125947	187657	0	0	0	47512.9	267126	243833	0	0	0	159778	301759	109136	0	0	0	43759	156853	64814.8	0
Butanoic acid, 3-[(trimethylsilyl)oxy]-	0	19115.1	14426	75865.4	548273	413863	0	0	0	256403	590109	256462	64593.4	0	0	45254.6	45349.5	73047.7	0	0	0	119074	42659.3	35255.1	0	0	0	161919	199663	202677	39911.2	0	0	46035.5	293822	276343	0	0	0	233650	486369	165489	0	0	0	0	169522	50339.9	0
(heptanoic acid tms)	0	0	0	0	35850.1	0	0	0	0	79994.9	105296	71886.4	0	0	0	40068.8	0	0	0	0	0	27486	81808.8	32006	0	0	0	172565	188930	84664.6	0	0	0	0	200857	143623	0	0	0	232539	281434	207531	0	0	0	0	72807.8	0	0
RI=1171.8, 7.9612 min 081816023	0	0	0	0	0	0	0	0	0	50067.8	127550	43179.1	0	0	0	35763.3	0	28447.8	0	0	0	68988.8	32263.8	20535.4	0	0	0	27199.6	78718.6	90754.6	0	0	0	0	20279.1	14961.9	0	0	0	0	33993.5	0	0	0	0	0	0	0	0
RI=1181.4, 8.0458 min 082616033	0	0	0	25594.1	28044.8	48051.1	0	0	0	0	22324.2	22949.9	0	0	0	61267.9	0	0	0	0	0	47366.3	112411	46176.2	0	0	0	236738	256129	116519	0	0	0	0	277912	186963	0	0	0	337919	354094	302068	0	0	0	0	243316	0	0
RI=1193.6, 8.1534 min 082316005	0	0	0	0	0	0	0	0	0	0	0	0	0	0	0	0	0	0	0	0	0	0	0	0	0	0	0	0	0	0	0	0	0	0	0	0	0	0	0	0	0	0	0	0	0	0	0	0	0
(N,O-Bis(trimethylsilyl)hydroxylamine)	31868.4	0	0	281400	162243	187095	38088.4	0	0	51342.4	121036	254754	30448.5	32216.7	0	518386	0	32332.3	40664.1	0	41027.6	57508.6	496121	170598	0	0	0	590067	629169	142051	35578.8	0	32392.9	19145.9	432195	218646	33003.6	36215.2	0	619470	316621	755343	32273.2	0	36414.1	0	634146	0	0
RI=1202.7, 8.2316 min 081816023	0	0	0	0	0	0	0	0	0	0	0	0	0	0	0	0	0	0	0	0	0	0	0	0	0	0	0	0	0	0	0	0	0	0	0	0	0	0	0	0	47306.5	0	0	0	0	0	0	0	0
Malonic acid (tms derivative)	32051.4	0	0	305698	386657	441051	42931.3	0	24336.3	53126.2	162433	272386	0	31128.2	0	574363	14286.5	30601.3	43828.6	0	42630.7	31366.1	484015	154698	0	14403.7	23570.2	498027	515070	62994.1	39139.5	0	33167.5	0	325295	96310	42748.8	41989.1	0	424161	45644.8	606911	34333.3	0	33802.1	22795.4	556194	0	17045.8
RI=1213.7, 8.3215 min 081816032	0	0	0	0	39141.8	41671.2	0	0	0	24329.5	34405.4	25818.5	0	0	0	32097.5	0	29727.7	0	0	0	40015.7	38733.4	0	0	0	0	73542.1	56455.7	63403.2	0	0	0	0	105536	78965.6	0	0	0	69342.6	168742	50764.5	0	0	0	0	93396.4	0	0
L-Valine, N-(trimethylsilyl)-, trimethy	0	0	0	35384.6	176840	182982	0	18308.8	0	0	120868	0	0	0	0	0	11880.5	35729.8	0	0	0	39421.8	42327.4	0	0	0	0	75568.2	42179.7	59785.1	0	0	0	21181.3	103312	75882.6	0	0	0	74236.7	155368	53605.6	0	0	0	30379.2	86108.7	0	0
RI=1239.9, 8.5343 min 081816023	0	0	0	0	0	0	0	0	0	0	66445.5	0	0	0	0	0	0	0	0	0	0	0	0	0	0	0	0	0	0	0	0	0	0	0	0	0	0	0	0	0	0	0	0	0	0	0	0	0	0
Norvaline (2TMS)	0	0	0	0	0	0	0	0	0	0	0	0	0	0	0	0	0	0	0	0	0	0	0	0	0	0	0	0	0	0	0	0	0	0	0	0	0	0	0	0	0	0	0	0	0	0	0	0	0
(EIQTMS_N12C_ATHL_1249.2_3161BN29_[917;	0	0	0	0	94147.6	49989.9	0	0	28262.2	0	108706	34806.1	0	0	0	36763.1	0	0	0	0	13356.4	48036.3	35908.3	0	0	14300.9	0	45980.4	35236.8	0	0	0	0	0	42121.6	42559	0	41111.7	0	41863.3	79398.3	39280.9	0	0	0	0	37404.3	0	0
Benzoic acid trimethylsilyl ester	0	0	0	0	0	0	0	0	0	0	14548.5	0	0	0	0	0	0	0	0	0	0	0	0	0	0	0	0	0	0	0	0	0	0	0	0	0	0	0	0	0	0	0	0	0	0	0	0	0	0
RI=1258.3, 8.6844 min 081816029	0	0	0	0	93959.5	49283.1	0	0	0	44668.2	107514	64210.7	0	0	0	72758.3	0	39725.4	0	0	0	0	44406.2	0	0	0	0	64347.6	79133.9	23100.9	0	0	0	0	82322.3	76821.3	0	0	0	95566.7	133359	70830.1	0	0	0	0	71988.9	0	0
(octanoic acid)	14582	17863.9	0	145916	0	845816	0	40426.2	0	40019.8	594032	43613.7	0	31855.1	15627.9	44705.6	16066.5	0	29921.8	0	20494.7	10473.7	58093.6	0	0	19634	39086.7	51456	63294.2	13587.7	17728.3	28069.1	27561.5	580.95	55970.4	43746.2	42795.8	42726.9	27828.2	73877.7	0	76486.6	23204.5	18984.7	0	69002	96294.4	0	16678.1
Pipecolic acid (TMS)	0	0	0	0	0	0	0	0	0	0	0	0	0	0	0	0	0	0	0	0	0	0	0	0	0	0	0	0	0	0	0	0	0	0	0	0	0	0	0	0	0	0	0	0	0	0	0	0	0
L-Leucine, N-(trimethylsilyl)-, trimeth	0	0	0	0	0	0	0	0	0	0	0	0	0	0	0	0	0	0	0	0	0	0	0	0	0	0	0	0	0	0	0	0	0	0	0	0	0	0	0	0	0	0	0	0	0	0	0	0	0
Trimethylsilyl ether of glycerol	0	0	0	0	0	0	0	0	0	0	0	0	0	0	0	0	0	0	0	0	0	0	0	0	0	0	0	0	0	0	0	0	0	0	0	0	0	0	0	0	0	0	0	0	0	0	0	0	0
Phosphoric acid (tms derivative)	0	0	0	0	0	0	0	0	0	0	0	0	0	0	0	0	0	0	0	0	0	0	0	0	0	0	0	0	0	0	0	0	0	0	0	0	0	0	0	0	0	0	0	0	0	0	0	0	0
L-Isoleucine, N-(trimethylsilyl)-, trim	0	0	0	0	0	0	0	0	0	0	0	0	0	0	0	0	0	0	0	0	0	0	0	0	0	0	0	0	0	0	0	0	0	0	0	0	0	0	0	0	0	0	0	0	0	0	0	0	0
(Nicotinic acid-TMS)	0	0	0	0	33823.6	0	0	0	0	0	0	0	0	0	0	0	0	0	0	0	0	0	0	0	0	0	0	0	0	0	0	0	0	0	0	0	0	0	0	0	0	0	0	0	0	0	0	0	0
L-Proline, 1-(trimethylsilyl)-, trimeth	0	0	0	0	0	0	0	0	0	0	0	0	0	0	0	0	0	0	0	0	0	0	0	0	0	0	0	0	0	0	0	0	0	0	0	0	0	0	0	0	0	0	0	0	0	0	0	0	0
(benzylacetic acid)	0	0	0	68875.2	199360	323220	25402	17318.2	0	460374	376486	164099	32291.8	64013.6	0	2.73784e+06	467616	1.36155e+06	0	131759	39975.8	5.43906e+06	5.79052e+06	1.38441e+06	42389.4	26018.5	108572	5.99248e+06	5.82486e+06	5.3486e+06	13895.5	0	82797.1	0	8.19504e+06	5.59467e+06	91639	29828.6	0	4.32014e+06	6654309	4.92764e+06	39981.9	118055	24402.9	101270	3.88187e+06	61769	42863.2
Maleic acid (2TMS)	294635	247731	179010	1.58225e+06	9.28804e+06	8.96662e+06	195839	416061	236199	585098	8.4587e+06	478992	167663	311370	179648	413910	254854	319848	319171	222426	227555	265215	477259	149223	104135	357268	335649	458357	605210	280574	181274	323198	296305	306410	548679	321615	352724	369891	370522	610403	852488	706584	220519	357730	253649	803380	889335	611556	293386
Glycine, N,N-bis(trimethylsilyl)-, trim	0	0	0	0	0	25674.5	0	0	0	0	25968.7	0	0	0	0	0	0	0	0	0	0	0	0	0	0	0	0	0	0	0	0	0	0	0	0	0	0	0	0	0	0	0	0	0	0	0	0	0	0
Succinic acid (tms derivative)	0	0	0	0	0	0	0	0	0	0	0	0	36957.9	0	0	0	0	0	0	0	0	0	0	0	0	0	0	0	0	0	0	0	0	0	0	0	0	0	0	0	0	0	0	0	0	0	0	0	0
(like succinic acid)	0	0	0	0	0	0	0	0	0	0	0	0	0	0	0	0	0	0	0	0	0	0	0	0	0	0	0	16132.4	0	0	0	0	0	0	27281.9	0	0	0	0	69963.2	102769	64176.4	0	0	0	0	62133.2	0	0
Glyceric acid (3TMS)	19638.7	0	0	62659.2	113108	342289	24423.3	18518.5	0	459506	100679	184490	32228.4	63920.3	0	2.73719e+06	468909	1.36184e+06	0	126822	39832.4	5.43796e+06	5.78929e+06	1.38608e+06	42465.8	27022	109159	5.9931e+06	5.82356e+06	5.35092e+06	13951	0	82714.7	0	8.19958e+06	5.59523e+06	106818	30224.8	0	4.31984e+06	6.6465e+06	4.9289e+06	40245.6	118718	24904.1	101603	3.87872e+06	57524.5	42587.9
(Pyrimidine, 2,4-bis[(trimethylsilyl)ox	0	0	0	0	0	0	0	0	0	0	0	0	0	0	0	0	0	0	0	0	0	0	0	0	0	0	0	0	0	0	0	0	0	0	0	0	0	0	0	0	0	0	0	0	0	0	0	0	0
Fumaric acid (tms derivative)	0	0	0	0	0	0	0	0	0	0	0	0	0	0	0	0	0	0	0	0	0	0	0	0	0	0	0	0	0	0	0	0	0	0	0	0	0	0	0	0	0	0	0	0	0	0	0	0	0
(nonanoic acid)	0	0	0	20885.2	0	0	0	0	0	46561.1	0	0	0	0	0	0	0	0	0	27312.8	0	49105	0	0	0	31689.3	0	0	0	0	0	0	0	0	30397.6	41580.3	0	0	0	43240.1	52966.5	35974.7	0	23550.3	0	49385.6	0	20870.8	0
Serine tritms	0	10597.7	0	29336.1	244720	155042	0	0	0	28732.3	66341.2	0	0	0	0	0	0	0	0	0	0	28012.2	0	0	0	19395	0	58758.4	84765.7	43146.4	0	0	0	0	97991.8	32096	0	0	0	251333	388434	226272	0	4267.07	0	43140.2	229841	9947.02	0
Pipecolic acid (2TMS)	0	0	0	0	0	0	0	0	0	0	0	0	0	0	0	0	0	0	0	0	0	0	0	0	0	0	0	0	0	0	0	0	0	0	0	0	0	0	0	0	0	0	0	0	0	0	0	0	0
RI=1371.9, 9.5687 min 082616028	0	0	0	0	0	0	0	0	0	0	0	0	0	0	0	0	0	0	0	0	0	0	0	0	0	0	0	0	0	0	0	0	0	0	0	0	0	0	0	0	0	0	0	0	0	0	0	0	0
RI=1384.6, 9.6650 min 081816023	0	0	0	0	0	0	0	0	0	0	0	14652.8	0	0	0	0	0	0	0	0	0	12692.8	23459.1	0	0	0	0	61014.9	116780	66451.4	0	0	0	0	40659.3	82123.5	0	0	0	32019	120555	66761.1	0	0	0	33568.9	28880.5	0	0
RI=1389.9, 9.7052 min 082316015	0	0	0	0	0	0	0	0	0	0	0	0	0	0	0	25026.6	0	21561.8	0	0	0	0	0	0	0	0	0	0	0	0	0	0	0	0	0	0	0	0	0	0	0	0	0	0	0	0	0	0	0
N,O,O-Tris(trimethylsilyl)-L-threonine	0	21414.5	0	0	21521.7	0	0	0	0	23002.8	0	25163.8	0	0	0	23803.8	19543	25193.5	0	23709.2	0	56639.1	35939.3	0	0	29351	0	52284.5	109891	63368.9	0	0	0	0	86894.3	66998.2	0	0	0	47956.7	112331	56287.8	0	0	0	48237.3	50105.7	0	0
4-methylcatechin	0	0	0	0	30495.1	43465.4	0	0	0	23499.8	0	30036.2	0	0	0	25045.1	0	0	0	0	0	0	25398.8	0	0	0	0	0	0	0	0	0	0	0	42235.4	32055.4	0	0	0	31159.6	51091.9	67266.2	0	0	0	0	105258	0	0
Glutaric acid (2TMS)	0	0	0	0	0	0	0	0	17698.2	0	50735.6	0	0	0	0	0	0	0	0	0	0	0	0	0	0	0	0	0	35660.5	0	0	0	0	0	29506.5	0	0	0	0	2639.22	38706.4	21641.2	0	0	0	0	11739.1	0	0
(Hydrocinnamic acid, trimethylsilyl est	0	0	0	0	0	29352.9	0	0	0	0	0	0	0	0	0	13505.3	0	0	0	0	0	125297	408242	25149.7	0	0	0	848450	487120	284742	0	0	0	0	969797	658196	0	0	0	611629	926113	1.21879e+06	0	0	0	0	420248	0	0
B-alanine (3TMS)	0	0	0	0	0	0	0	0	0	0	0	0	0	0	0	0	0	0	0	0	0	0	0	0	0	0	0	0	0	0	0	0	0	0	0	0	0	0	0	0	0	0	0	0	0	0	0	0	0
(Mandelic acid (ditms))	0	0	0	0	31300	0	0	0	0	0	0	0	0	0	0	0	0	0	0	0	0	62728.2	171842	0	0	0	0	353014	218255	129993	0	0	0	0	412981	278231	0	0	0	254583	369612	505428	0	0	0	0	177783	0	0
Erythrose peak 1 (TMSoxime)	0	0	0	0	11826.6	0	0	0	0	0	0	0	0	0	0	0	0	0	0	0	0	0	0	0	0	0	0	18126	0	0	0	0	0	0	21817.5	0	0	0	0	0	24442.3	25775.2	0	0	0	0	0	0	0
L-Homoserine, tris(trimethylsilyl) deri	0	0	0	0	0	0	0	0	0	0	0	0	0	0	0	0	0	0	0	0	0	0	0	0	0	0	0	0	0	0	0	0	0	0	0	0	0	0	0	0	0	0	0	0	0	0	0	0	0
(decanoic acid TMS)	0	0	0	0	0	0	0	0	0	0	0	0	0	0	0	0	0	0	0	0	0	0	0	0	0	0	0	0	0	0	0	0	0	0	0	0	0	0	0	0	0	0	0	0	0	7203.31	0	0	0
Erythrose, O-methyloxime, tris-O-(trime	0	0	0	0	31503	38456.8	0	0	0	9581.1	31177.9	26673.3	0	0	0	34403.6	1352.97	0	0	0	0	59021.2	131963	0	0	0	0	311444	201810	120361	0	0	0	0	354326	266479	0	0	0	255377	347232	506853	0	0	0	0	161374	0	0
Citramalic acid (?TMS)	0	0	0	0	0	0	0	0	0	0	0	0	0	0	0	0	0	0	0	0	0	0	0	0	0	0	0	0	0	0	0	0	0	0	0	0	0	0	0	0	0	0	0	0	0	0	0	0	0
Malic acid (tms derivative)	0	0	0	18554.8	33053.9	80749.3	0	0	0	0	42754.5	0	0	0	0	0	0	0	0	0	0	0	0	0	0	0	0	47286	34133	0	0	0	0	0	34849	0	0	0	0	33397.4	46883.1	15776.1	0	0	0	0	33669.1	0	0
(Adipic acid)	0	0	0	0	26703.2	0	0	0	0	0	35602.4	0	0	0	0	0	16710.1	0	0	0	0	38783.8	42072.4	27049.3	0	0	0	50386.9	90380.9	0	0	0	0	0	50135.1	0	0	0	0	80008.2	51535.4	85631.2	0	0	0	0	53670.3	0	0
Erythritol (tms derivative)	0	0	0	0	17901.4	18317.8	0	0	0	0	30301.3	7148.71	0	0	0	0	0	0	0	0	0	0	0	0	0	0	0	0	0	0	0	0	0	0	0	0	0	0	0	0	12256.6	0	0	0	0	0	0	0	0
Benzoic acid, 2-[(trimethylsilyl)oxy]-,	0	0	0	0	0	0	0	0	0	0	0	0	0	0	0	0	0	0	0	0	0	0	0	0	0	0	0	0	0	0	0	0	0	0	0	0	0	0	0	0	0	0	0	0	0	0	0	0	0
RI=1521.9, 10.6424 min 081816029	0	0	0	0	100039	67941.2	0	0	0	55143.4	174885	68465.7	0	0	0	44634.8	0	48775.9	0	0	0	0	0	0	0	0	0	0	37421.6	0	0	0	0	0	0	0	0	0	0	0	0	36242.7	0	0	0	64236	109124	65916.3	0
L-Aspartic acid, N-(trimethylsilyl)-, b	0	0	0	0	0	0	0	0	0	0	0	0	0	0	0	0	0	0	0	0	0	0	0	0	0	0	0	0	0	0	0	0	0	0	0	0	0	0	0	0	0	0	0	0	0	0	0	0	0
L-Methionine, N-(trimethylsilyl)-, trim	0	0	0	0	177655	96458.9	0	0	0	116424	300342	147624	0	0	0	70913.6	28247.6	56547.1	0	0	0	49236.3	55102.6	0	0	0	0	58769.4	136959	0	0	0	10793.5	0	61021.8	0	0	0	0	107183	86531.8	141557	0	0	0	79363.8	264801	104772	0
L-Proline, 5-oxo-1-(trimethylsilyl)-, t	0	0	0	0	0	0	0	0	0	0	0	0	0	0	0	0	0	0	0	0	0	0	0	0	0	0	0	0	0	0	0	0	0	0	0	0	0	0	0	0	0	0	0	0	0	0	0	0	0
Hydroxyproline (tms derivative)	0	0	0	0	0	0	0	0	0	0	0	0	0	0	0	0	0	0	0	0	0	0	0	0	0	0	0	0	0	0	0	0	0	0	0	0	0	0	0	0	0	0	0	0	0	0	0	0	0
GABA (tritms)	0	0	0	0	0	0	0	0	0	0	0	0	0	0	0	0	0	0	0	0	0	0	0	0	0	0	0	0	0	0	0	0	0	0	0	0	0	0	0	0	0	0	0	0	0	0	0	0	0
Cinnamic acid (TMS)	0	0	0	0	0	0	0	0	0	0	0	0	0	0	0	0	0	0	0	0	0	0	0	0	0	0	0	0	39769	0	0	0	0	0	0	0	0	0	0	33742.9	0	42134.9	0	0	0	0	0	0	0
RI=1551.4, 10.8417 min 082316015	0	0	0	0	69295.3	70250.8	0	0	0	0	0	0	0	0	0	0	0	0	0	0	0	0	0	0	0	0	0	34106	0	0	0	0	0	0	29066.2	37062.2	0	0	0	44158.3	44126.1	0	0	0	0	0	49540	0	0
Alanine, phenyl-, trimethylsilyl ester,	0	0	0	0	0	0	0	0	0	0	0	0	0	0	0	0	0	0	0	0	0	0	0	0	0	0	0	0	0	0	0	0	0	0	0	0	0	0	0	0	0	0	0	0	0	0	0	0	0
(EIQTMS_N12C_NID1_1542.3_1267BK12_[786;	14755.2	0	0	0	0	0	0	0	0	0	0	0	0	0	0	0	0	0	0	18071.7	0	0	0	0	0	21474.3	0	0	27858.1	24825.6	0	0	0	0	0	0	0	0	0	24940.5	0	0	0	0	0	0	0	0	0
L-Cysteine, N,S-bis(trimethylsilyl)-, t	0	0	0	0	9438.97	0	0	0	0	0	0	0	0	0	0	0	0	0	0	0	0	0	0	0	0	0	0	0	0	0	0	0	0	0	0	0	0	0	0	0	0	0	0	0	0	0	0	0	0
Threonic acid (?TMS)	0	0	0	0	41938.5	0	0	0	0	0	0	0	0	0	0	0	0	0	0	0	0	0	0	0	0	0	0	0	0	0	0	0	0	0	0	0	0	0	0	0	0	0	0	0	0	0	0	0	0
2-oxo-glutaric acid (methoximino, ditms	0	0	0	0	81267.6	73036.3	0	0	0	0	217721	0	0	0	0	0	0	0	0	0	0	0	0	0	0	0	0	33783	0	0	0	0	0	0	0	0	0	0	0	40281.2	0	0	0	0	0	0	38105.9	0	0
L-Asparagine, N,N2-bis(trimethylsilyl)-	0	0	0	0	0	0	0	0	0	0	0	0	0	0	0	0	0	0	0	0	0	0	0	0	0	0	0	0	0	0	0	0	0	0	0	0	0	0	0	0	0	0	0	0	0	0	0	0	0
Pimelic acid (2TMS)	0	0	0	45814.1	1.28208e+06	757404	0	0	0	0	221282	0	0	0	0	0	0	0	0	0	0	0	0	0	0	0	0	0	0	0	0	0	0	0	0	0	0	0	0	159192	119162	136366	0	0	0	0	190298	0	0
L-Arginine (tms derivative)	0	0	0	0	191773	116533	0	0	0	0	0	0	0	0	0	0	0	0	0	0	0	0	0	0	0	0	0	0	0	0	0	0	0	0	0	0	0	0	0	0	0	0	0	0	0	0	0	0	0
Glutamic acid (tms derivative)	0	0	0	0	0	0	0	0	0	0	0	0	0	0	0	0	0	0	0	0	0	0	0	0	0	0	0	0	0	0	0	0	0	0	0	0	0	0	0	0	0	0	0	0	0	0	0	0	0
Benzoic acid, 4-[(trimethylsilyl)oxy]-,	0	0	0	0	0	0	0	0	0	0	0	0	0	0	0	0	0	0	0	0	0	0	0	0	0	0	0	0	0	0	0	0	0	0	0	0	0	0	0	0	0	0	0	0	0	0	0	0	0
RI=1638.1, 11.4122 min 081816032	0	0	0	0	0	0	0	0	0	0	0	0	0	0	0	0	0	0	0	0	0	0	0	0	0	0	0	0	0	0	0	0	0	0	0	0	0	0	0	0	0	0	0	0	0	0	0	0	0
N,O-Bis(trimethylsilyl)-L-phenylalanine	0	0	0	0	0	0	0	0	0	0	0	0	0	0	0	0	0	0	0	0	0	0	0	0	0	0	0	0	8782.5	0	0	0	0	0	0	0	0	0	0	0	15300.4	0	0	0	0	0	0	0	0
(p-Hydroxyphenylacetic acid (tms))	0	0	0	114687	70831.7	103395	0	0	0	29006.3	29363.4	64154.6	0	0	0	144981	0	0	0	0	0	0	72449	36522.7	0	0	0	46790.9	45471.3	0	0	0	0	0	29193.5	0	0	0	0	33064.2	183532	66269.4	0	0	0	0	73905.1	0	0
Dodecanoic acid (TMS)	0	0	0	0	31519	0	0	0	0	0	0	0	0	0	0	0	0	0	0	0	0	0	0	0	0	0	0	0	0	0	0	0	0	0	0	0	0	0	0	0	0	0	0	0	0	0	0	0	0
Tartaric acid, bis-O-(trimethylsilyl)-,	0	0	0	39305.6	28771.9	35260.2	0	0	0	0	32108.7	0	0	0	0	0	0	0	0	0	0	0	0	0	0	0	0	0	0	0	0	0	0	0	17566.6	0	0	0	0	0	0	0	0	0	0	0	0	0	0
d-Xylose peak 1 (tms, methoxamine deriv	0	0	0	111930	69940.7	109556	0	0	0	0	29238.3	27959.1	0	0	0	51048.6	0	0	0	0	0	0	46888.2	16275.4	0	0	0	26042.5	18724.2	0	0	0	0	0	15815.1	0	0	0	0	0	165894	44453.3	0	0	0	0	36245.8	0	0
Arabinose (methoxamino, tms derivative)	0	0	0	64026.9	109355	98617.2	0	0	0	78540.4	117655	64504.2	0	0	0	144392	20221.8	35702	0	0	0	47456.4	71374.9	36722.3	0	0	0	46293.9	44852.4	39754.4	0	0	0	0	27806	47033.5	0	0	0	32003.2	126359	62468.8	0	0	0	0	74456.5	0	0
d-Ribose, 2,3,4,5-tetrakis-O-(trimethyl	0	0	0	61182.4	539434	414056	0	0	0	79228.9	572342	86448	0	0	0	144426	0	36380.5	0	0	0	0	71153.2	36715.4	0	0	0	46256.3	110037	44445	0	0	0	0	67651.8	61295.5	0	0	0	75119	146122	80075.7	0	0	0	0	83598.4	0	0
RI=1717.4, 11.9122 min 081816029	0	0	0	0	320866	155923	0	0	0	0	53555.3	0	0	0	0	0	0	0	0	0	0	38019.1	0	0	0	0	0	74803.7	81909.8	0	0	0	0	0	0	0	0	0	0	57060.8	0	287356	0	0	0	0	87449.7	0	0
(dithioerythritol??)	0	0	0	0	289225	85731.7	0	0	0	144465	470376	59539.3	0	0	0	32845.7	0	29088.7	0	0	0	80735.2	92428.2	0	0	0	0	102923	191246	250465	0	0	0	0	383041	134999	0	0	0	277557	729403	536582	0	0	0	567613	204702	228450	0
RI=1733.1, 12.0073 min 081816029	0	0	0	0	154550	45382.5	0	0	0	0	61168.4	0	0	0	0	0	0	0	0	0	0	0	13878	0	0	0	0	0	0	0	0	0	0	19424.5	0	0	0	0	0	0	87359.3	37105.1	0	0	0	355360	165251	147569	0
Rhamnose peak 1(TMSoxime)	0	0	0	14073.8	290199	145205	0	0	0	0	35699.5	0	0	0	0	0	0	0	0	0	0	32975.1	0	0	0	0	0	0	0	0	0	0	0	0	0	0	0	0	0	0	0	0	0	0	0	0	0	0	0
Arabinitol/Xylitol	0	0	0	200592	4.76215e+06	2.37341e+06	0	0	0	84951.9	426426	43137.4	0	0	0	42506	0	23403	0	0	0	35911.1	30351.7	0	0	0	0	36653.7	29365.5	0	0	0	0	0	0	33103.1	0	0	0	41120.8	0	13804.6	0	0	0	0	41266.1	0	0
Rhamnose peak 2 (TMSoxime)	0	0	0	0	0	0	0	0	0	33610.2	410325	24650.7	0	0	0	29637.1	0	0	0	0	0	34400.8	41208.8	0	0	0	0	107591	172644	261484	0	0	0	0	384571	134121	0	0	0	231112	646159	538636	0	0	0	0	179302	0	0
Adonitol (TMSoxime)	0	0	0	0	1.17879e+06	0	0	0	0	0	178636	0	0	0	0	0	0	0	0	0	0	0	0	0	0	0	0	0	0	0	0	0	0	0	0	0	0	0	0	0	21467.7	35044.8	0	0	0	0	0	0	0
Putrescine (4TMS)	0	0	0	0	63115.7	33823.3	0	0	0	0	0	0	0	0	0	0	0	0	0	0	0	0	0	0	0	0	0	0	0	0	0	0	0	0	0	0	0	0	0	0	0	0	0	0	0	0	0	0	0
Fucose peak 1 (TMSoxime)	0	0	0	40852.4	1.15352e+06	605732	0	0	0	0	174396	0	0	0	0	0	0	0	0	0	0	0	0	0	0	0	0	0	0	25065.2	0	0	0	0	63154.5	20615.6	0	0	0	37286	92154.4	91000.3	0	0	0	0	0	0	0
RI=1750.8, 12.1140 min 081816029	0	0	0	0	112763	44392.7	0	0	0	58936	87520.8	0	0	0	0	0	0	0	0	0	0	29684	36400.8	0	0	0	0	37804.7	45476.9	0	0	0	0	0	43395.3	0	0	0	0	0	62961	62593	0	0	0	236006	133181	92541.5	0
cis-Aconitic acid (3TMS)	0	0	0	0	0	0	0	0	0	0	0	0	0	0	0	0	0	0	0	0	0	0	0	0	0	0	0	0	0	0	0	0	0	0	0	0	0	0	0	0	0	0	0	0	0	0	0	0	0
RI=1754.9, 12.1394 min 082316005	0	0	0	77218.8	369778	292727	0	0	0	120691	303435	128331	0	0	0	248016	0	22738.8	0	0	0	69605	136011	44460.4	0	0	0	192750	258948	185547	0	0	0	28269.5	391479	222365	0	0	0	225550	257508	534708	0	0	0	571150	337936	228886	0
(Hydrocinnamic acid, p-(trimethylsiloxy	0	0	0	0	0	0	0	0	0	0	38642.4	0	0	0	0	17835.3	0	0	0	0	0	152995	341101	0	0	0	0	18775.8	197120	415362	0	0	0	0	336258	31458.9	0	0	0	63790.5	120869	63702.4	0	0	0	0	26685.1	0	0
Glycerol 3-phosphate (4TMS)	0	0	0	0	110623	46658.4	0	0	0	59176.7	169490	0	0	0	0	0	0	0	0	0	0	29871.9	37961.6	0	0	0	0	38752.5	49510.3	0	0	0	0	0	44207.1	0	0	0	0	0	63671.4	63362.2	0	0	0	234111	134236	92565.5	0
(Arabinofuranose, 1,2,3,5-tetrakis-O-(t	0	0	0	0	134094	65821	0	0	0	19855.3	27230.8	0	0	0	0	0	0	0	0	0	0	0	0	0	0	0	0	31710	105754	53821.7	0	0	0	0	84236.2	107179	0	0	0	15320.1	256555	77451.4	0	0	0	0	36009.3	0	0
RI=1797.6, 12.3974 min 081816023	0	0	0	129495	2.99625e+06	1.45806e+06	0	0	0	434013	1.45653e+06	207450	0	0	0	0	0	0	0	0	0	45083.7	61865.8	0	0	0	0	56119.8	79006.9	54850.7	0	0	0	0	88213.2	62454.9	0	0	0	73931.9	191647	89408.7	0	0	0	0	89325.4	0	0
RI=1799.4, 12.4084 min 082616028	0	0	0	33105.2	913519	425389	0	0	0	107562	397351	66889.1	0	0	0	0	0	0	0	0	0	9383.06	15330.8	0	0	0	0	12609.1	0	13920.1	0	0	0	0	15305.3	13790.2	0	0	0	15599.6	50941.7	18889.9	0	0	0	0	10375.5	0	0
(EIQTMS_N12C_NID1_1774.7_1248BK08_[920;	0	0	0	39622.2	896716	416581	0	0	0	124535	415518	66493.7	0	0	0	0	0	0	0	0	0	0	0	0	0	0	0	0	24942.3	0	0	0	0	0	0	0	0	0	0	0	40711.5	25102.1	0	0	0	0	0	0	0
Shikimic acid (tms derivative)	0	0	0	0	45397.6	17146.2	0	0	0	0	0	0	0	0	0	0	0	0	0	0	0	0	0	0	0	0	0	0	0	0	0	0	0	0	0	0	0	0	0	0	0	0	0	0	0	0	0	0	0
3-phospoglyceric acid (TMS)	0	0	0	0	0	0	0	0	0	0	0	0	0	0	0	0	0	0	0	0	0	0	0	0	0	0	0	0	0	0	0	0	0	0	0	0	0	0	0	0	0	0	0	0	0	0	0	0	0
RI=1826.5, 12.5650 min 082316015	0	0	0	0	206230	93282.1	0	0	0	29529	90642.5	0	0	0	0	0	0	0	0	0	0	0	0	0	0	0	0	0	0	0	0	0	0	0	0	0	0	0	0	0	0	0	0	0	0	0	0	0	0
L-Ornithine, N2,N5,N5-tris(trimethylsil	0	0	0	0	12280.6	0	0	0	0	0	0	0	0	0	0	0	0	0	0	0	0	0	0	0	0	0	0	0	0	0	0	0	0	0	0	0	0	0	0	0	0	0	0	0	0	0	0	0	0
Isocitric acid (tms derivative)	0	0	0	30891.8	912873	417051	0	0	0	141427	447450	74769.1	0	0	0	0	0	0	0	0	0	0	13533.6	0	0	0	0	0	0	0	0	0	0	0	0	0	0	0	0	0	0	26584.3	0	0	0	0	0	0	0
Citric acid (tms derivative)	0	0	0	123795	2.95654e+06	1.45793e+06	0	0	0	405379	1.41573e+06	206843	0	0	0	0	0	0	0	0	0	0	40275.8	0	0	0	0	22501.6	24887.2	0	0	0	0	0	42010.4	36104.8	0	0	0	18618.3	129301	51964.2	0	0	0	0	49684.5	0	0
(EIQTMS_N12C_SCA_1852.6_3147BF23_[931;	0	0	0	32856.9	25770.6	257767	0	0	0	0	0	0	0	0	0	0	0	0	0	0	0	22042.4	0	0	0	0	0	16980.2	21862.2	25914.7	0	0	0	0	0	18131.1	0	0	0	32041.2	88385.6	49688.4	0	0	0	17709	27244.4	0	0
RI=1852.7, 12.7162 min 081816012	0	0	0	330760	259468	3.07565e+06	0	0	0	0	44047.7	0	0	0	0	0	0	0	0	0	0	21609.1	0	0	0	0	0	0	0	0	0	0	0	0	0	0	0	0	0	41300.3	20479.5	54343.1	0	0	0	0	513338	0	0
Pinitol (TMS)	0	0	0	0	0	0	0	0	0	0	0	0	0	0	0	0	0	0	0	0	0	0	0	0	0	0	0	0	0	0	0	0	0	0	0	0	0	0	0	0	0	0	0	0	0	0	0	0	0
Quinic acid (tms derivative)	0	0	0	0	0	0	0	0	0	0	0	0	0	0	0	0	0	0	0	0	0	0	0	0	0	0	0	0	0	0	0	0	0	0	0	0	0	0	0	0	0	0	0	0	0	0	0	0	0
D-Fructose, 1,3,4,5,6-pentakis-O-(trime	0	0	0	0	0	0	0	0	0	0	0	0	0	0	0	0	0	0	0	0	0	0	0	0	0	0	0	0	0	0	0	0	0	0	0	0	0	0	0	0	0	0	0	0	0	0	0	0	0
(EIQTMS_N12C_ATHL_1898.3_3038BN25_[908;	0	0	0	488257	674083	3.40957e+06	0	0	0	125866	326004	61065.6	0	0	0	45884.1	0	42909.2	0	0	0	95142.9	117293	0	0	0	0	111271	96052.4	79816.7	0	0	0	31219.4	112958	75170.8	0	0	0	61425.8	156647	66457.4	0	0	0	63276	121320	39981.8	0
d-Glucose, 2,3,4,5,6-pentakis-O-(trimet	0	0	0	6.68678e+06	7.43044e+07	6.20604e+07	0	0	0	97322.4	3.42066e+06	46060.8	0	0	0	0	53322.4	0	0	0	0	61925.8	71622.3	0	0	0	0	0	0	54539.2	0	0	0	0	0	0	0	0	0	0	0	0	0	0	13941.4	0	0	0	0
L-Lysine, N2,N6,N6-tris(trimethylsilyl)	0	0	0	61165.2	599977	580497	0	0	0	0	24292.8	0	0	0	0	0	0	0	0	0	0	0	0	0	0	0	0	0	0	0	0	0	0	0	0	0	0	0	0	0	0	0	0	0	0	0	0	0	0
Cinnamic acid, p-(trimethylsiloxy)-, tr	0	0	0	51536.9	285661	430578	0	0	0	0	0	0	0	0	0	0	0	0	0	0	0	0	0	0	0	0	0	0	0	0	0	0	0	0	0	0	0	0	0	0	14282.5	0	0	0	0	0	0	0	0
L-Tyrosine, N,O-bis(trimethylsilyl)-, t	0	0	0	365136	3.34014e+06	2.93924e+06	0	0	0	0	153606	0	0	0	0	0	0	0	0	0	0	0	0	0	0	0	0	25804.9	24992.7	0	0	0	0	0	32866.1	23914.1	0	0	0	26035.7	97304.4	31281.5	0	0	0	48545.4	96956.1	0	0
D-Mannitol, 1,2,3,4,5,6-hexakis-O-(trim	0	0	0	6.78787e+06	5.94085e+07	5.60425e+07	0	0	0	283485	426133	156432	0	0	0	173866	97799.7	119274	0	0	0	199375	353505	48905.9	0	0	0	362042	390738	180744	0	14046.3	0	182371	440060	325156	0	0	0	387239	1.7674e+06	527229	0	0	0	745769	1.43625e+06	355063	0
Sorbitol (tms derivative)	0	0	0	4.58683e+06	4.25187e+07	3.92769e+07	0	0	0	189197	518744	105186	0	0	0	119041	70057.2	80353.7	0	0	0	144930	237046	37271.7	0	0	0	259640	284914	128708	0	0	0	128896	299447	234692	0	0	0	256991	1.25078e+06	370307	0	0	0	528359	1.02288e+06	252746	0
L-Ascorbic acid, 2,3,5,6-tetrakis-O-(tr	0	0	0	1.83169e+06	6.46453e+07	5.62254e+07	0	0	0	382867	1.12629e+06	228645	0	0	0	280651	162201	188343	0	0	0	323906	527221	94213.9	0	28872.9	0	586100	645160	294079	0	0	0	276433	668423	524860	0	34226.9	0	595268	2.50087e+06	244691	0	0	28840.9	207500	506689	486254	0
(EIQTMS_N12C_SD2_1997.2_3237BF23_Galact	0	0	0	51956.4	479185	371991	0	0	0	299344	479738	129877	0	0	0	122750	92290.1	105290	0	0	0	75326.4	251286	59383.6	0	0	0	151999	230786	61058.9	0	0	0	196209	152575	101677	0	0	0	172564	270479	255682	0	0	0	396985	1.00952e+06	311379	0
(another inositol??)	0	0	0	93337	0	0	0	0	0	0	0	0	0	0	0	0	0	0	0	0	0	0	0	0	0	0	0	0	0	0	0	0	0	0	0	0	0	0	0	0	0	0	0	0	0	0	0	0	0
Pantothenic acid, O,O,O-tris(trimethyls	0	0	0	108500	638197	489859	0	0	0	25095.5	39538.2	0	0	0	0	0	0	0	0	0	0	0	0	0	0	0	0	0	21553.8	0	0	0	0	16591.7	13773.4	0	0	0	0	16282.9	45431.1	0	0	0	0	32065	82356.8	24394.6	0
RI=2009.8, 13.5921 min 081816029	0	0	0	0	38335	0	0	0	0	0	0	0	0	0	0	0	0	0	0	0	0	0	0	0	0	0	0	0	0	0	0	0	0	0	0	0	0	0	0	0	0	0	0	0	0	0	0	0	0
D-Gluconic acid, 2,3,4,5,6-pentakis-O-(	0	0	0	97091.8	382940	147950	0	0	0	77199	156938	0	0	0	0	0	0	0	0	0	0	0	0	0	0	0	0	31054.8	47121.1	0	0	0	0	0	0	56402.9	0	0	0	27159.2	82796	39928.2	0	0	0	22052.8	0	0	0
Hexadecanoic acid, trimethylsilyl ester	0	0	0	0	12006.4	0	0	0	0	0	0	0	0	0	0	0	0	0	0	0	0	0	0	0	0	0	0	0	0	0	0	0	0	0	0	0	0	0	0	0	0	0	0	0	0	0	0	0	0
GSIL67	0	0	0	130098	56677.6	49442.5	0	0	0	0	0	0	0	0	0	0	0	0	0	0	0	0	0	0	0	0	0	0	0	0	0	0	0	0	0	0	0	0	0	0	0	0	0	0	0	0	0	0	0
scyllo-inositol (6TMS)	0	0	0	0	371915	147943	0	0	0	485414	324079	46981.4	0	0	0	0	137731	127090	0	0	0	411841	55096.1	0	0	0	0	45985.9	68727.5	152378	0	0	0	38641.7	0	0	0	0	0	47944.9	123609	52944.4	0	0	0	224121	54149.8	115171	0
Mucic acid (6TMS)	0	0	0	0	261217	83668.1	0	0	0	500048	319766	47741.1	0	0	0	0	145124	131895	0	16113.3	0	418297	56423.7	0	0	0	0	47483.2	69986.7	161162	0	0	0	39734.8	34337.8	0	0	0	0	53965.8	130077	53709.4	0	0	0	218432	52099	122655	0
Ferulic acid, trimethylsiloxy, trimethy	0	0	0	0	0	0	0	0	0	0	0	0	0	0	0	0	0	0	0	0	0	0	0	0	0	0	0	0	0	0	0	0	0	0	0	0	0	0	0	0	0	0	0	0	0	0	0	0	0
Inositol, 1,2,3,4,5,6-hexakis-O-(trimet	0	0	0	0	0	0	0	0	0	0	0	0	0	0	0	40947.6	0	0	0	0	0	0	0	0	0	0	0	0	24192	0	0	0	0	0	0	0	0	0	0	0	38438.2	0	0	0	0	0	36207.1	0	0
Caffeic acid (3TMS)	0	0	0	0	0	0	0	0	0	0	0	0	0	0	0	0	0	0	0	0	0	0	0	0	0	0	0	0	0	0	0	0	0	0	0	0	0	0	0	0	0	0	0	0	0	0	0	0	0
Linoleic acid (TMS)	0	0	0	61553.4	348730	260125	0	0	0	42793.9	208616	74339.8	0	0	0	226951	0	24950.6	0	0	0	54380	107483	67975.7	0	0	0	33952.3	0	0	0	0	0	0	0	0	0	0	0	34024.3	31545.8	29529.9	0	0	0	0	55984.5	0	0
Oleic acid, trimethylsilyl ester	0	0	0	0	43175.7	62276.3	0	0	0	0	59131.3	0	0	0	0	0	0	0	0	0	0	0	0	0	0	0	0	0	0	0	0	0	0	0	0	0	0	0	0	0	0	0	0	0	0	0	0	0	0
Octadecanoic acid (TMS)	0	0	0	0	99922.1	34947.3	0	0	0	60949.4	89005.6	0	0	0	0	0	0	0	0	0	0	0	0	0	0	0	0	0	0	0	0	0	0	0	0	0	0	0	0	0	0	0	0	0	0	0	0	0	0
L-Tryptophan, N,1-bis(trimethylsilyl)-,	0	0	0	0	0	0	0	0	0	0	0	0	0	0	0	0	0	0	0	0	0	0	0	0	0	0	0	0	0	0	0	0	0	0	0	0	0	0	0	0	0	0	0	0	0	0	0	0	0
RI=2249.1, 14.8063 min 081816032	0	0	0	0	54416.4	19741.8	0	0	0	35911.3	49568.2	15003	0	0	0	0	0	0	0	0	0	0	0	0	0	0	0	0	0	0	0	0	0	0	0	0	0	0	0	0	0	0	0	0	0	0	0	0	0
Sinapic acid (TMS)	0	0	0	0	0	0	0	0	0	0	0	0	0	0	0	0	0	0	0	0	0	0	0	0	0	0	0	0	0	0	0	0	0	0	0	0	0	0	0	0	0	0	0	0	0	0	0	0	0
RI=2264.5, 14.8808 min 082316005	0	0	0	0	47446.2	0	0	0	0	0	0	0	0	0	0	0	0	0	0	0	0	0	0	0	0	0	0	0	0	0	0	0	0	0	0	0	0	0	0	0	0	0	0	0	0	0	0	0	0
RI=2269.1, 14.9027 min 082616028	0	0	0	36273.4	180968	150610	0	0	0	137775	181628	99862.1	0	0	0	101059	78471.7	165642	0	25216.2	0	105763	86575.8	31335.1	0	44314.6	0	42668.5	67437.9	34009.8	0	25287	0	0	38279.3	30242.4	0	0	0	76990.3	103565	61401.9	40195.7	72618.7	0	52038.6	35250.3	0	0
RI=2293.6, 15.0211 min 082616028	0	0	0	0	15738.4	22455.5	0	0	0	0	0	0	0	0	0	0	0	0	0	0	0	0	0	0	0	0	0	0	0	0	0	0	0	0	0	0	0	0	0	0	0	0	0	0	0	0	0	0	0
(EIQTMS_N12C_NID1_3140.6_1334BV19_[Diga	0	0	0	0	131624	0	0	0	0	89116.2	95830	0	0	0	0	0	0	0	0	0	0	62353.8	51702	0	0	0	0	176676	188378	152717	0	0	0	0	150017	170299	0	0	0	235430	375287	296602	0	48492.5	0	90010	304260	65963.5	0
BGSIL61	0	0	0	0	0	0	0	0	0	0	22713.3	0	0	0	0	0	0	0	0	0	0	0	0	0	0	0	0	0	0	0	0	0	0	0	0	0	0	0	0	0	0	0	0	0	0	0	0	0	0
(EIQTMS_N12C_LJAF_3142.1_2236BN50_[Diga	351622	350098	232605	983626	838114	644000	104625	411436	148880	773119	573986	735048	91516.4	137522	189954	494337	331734	520366	246743	412145	186031	674657	665972	209664	0	416852	191172	741891	787987	544713	156928	256368	189549	283853	581307	528113	208219	176110	56576.9	742544	919300	795979	352227	361706	173383	949128	694511	641593	227176
GSIL84	0	0	0	0	0	0	0	0	0	0	0	0	0	0	0	0	0	0	0	0	0	0	0	0	0	0	0	0	0	0	0	0	0	0	0	0	0	0	0	0	0	0	0	0	0	0	0	0	0
Phenyl Beta-D-Glucopyranoside	0	0	0	0	83083.8	0	0	0	0	0	47895.4	0	0	0	0	0	0	0	0	0	0	69461	52043.9	0	0	0	0	179746	214547	159566	0	0	0	1607.89	152840	180423	0	0	0	235843	393186	306329	0	0	0	92048.4	314156	67955.1	0
RI=2386.9, 15.4545 min 082616028	52370.2	57357.9	55558	182504	183450	179557	37636	60966.3	36579.3	48971.2	129635	62565.9	40329.5	41395.7	43157.3	48924.2	0	23439.7	34995.9	50407.4	54752.9	0	0	0	0	136038	41749.9	25526	31555.4	0	33159.6	40616.6	55853.8	21879.2	30949.7	47268.2	60461.1	38551.7	33764.4	33680.7	0	0	0	67472.8	61207.3	35566.5	0	0	35433.7
like (2-O-Glycerol-.alpha.-d-galactopyr	0	0	0	35309.4	254378	148259	0	0	0	0	0	0	0	0	0	0	0	0	0	0	0	0	0	0	0	32684.1	0	0	0	0	0	0	0	0	0	0	13793.2	0	0	28625.8	0	19136.3	0	13189	12612.7	18470.4	17244.3	0	0
RI=2409.9, 15.5592 min 081816029	0	0	0	110743	1.10659e+06	821456	0	0	0	230034	856562	295883	0	0	0	0	0	0	0	0	0	0	0	0	0	0	0	0	28471.5	0	0	0	0	0	0	0	0	0	0	0	0	0	0	0	0	0	0	0	0
RI=2422.3, 15.6142 min 081816029	0	0	0	0	0	0	0	0	0	0	0	0	0	0	0	0	0	0	0	0	0	0	0	0	0	0	0	0	0	0	0	0	0	0	0	0	0	0	0	0	0	0	0	0	0	0	0	0	0
RI=2429.9, 15.6479 min 082616028	0	0	0	111496	1.10295e+06	822931	0	0	0	228495	856127	295434	0	0	0	0	0	0	0	0	0	0	0	0	0	0	0	0	0	0	0	0	0	0	0	0	0	0	0	0	0	0	0	0	0	0	19942.4	0	0
Eicosanoic acid (TMS)	0	0	0	0	0	4398	0	0	0	0	0	0	0	0	0	0	0	0	0	0	0	0	0	0	0	0	0	0	0	0	0	0	0	0	0	0	0	0	0	0	0	0	0	0	0	0	0	0	0
(Oleanitrile)	0	0	0	0	0	0	0	0	0	0	0	0	0	0	0	0	0	0	0	0	0	0	0	0	0	0	0	0	0	0	0	0	0	0	0	0	0	0	0	0	0	0	0	0	0	0	0	0	0
RI=2522.0, 16.0547 min 081816029	0	0	0	0	0	0	0	0	0	0	0	0	0	0	0	0	0	0	0	0	0	0	0	0	0	0	0	0	0	0	0	0	0	0	0	0	0	0	0	0	0	0	0	0	0	0	0	0	0
RI=2536.5, 16.1169 min 082316015	0	0	0	0	0	0	0	0	0	0	0	0	0	0	0	0	0	0	0	0	0	0	0	0	0	0	0	0	0	0	0	0	0	0	0	0	0	0	0	0	0	0	0	0	0	0	0	0	0
RI=2548.8, 16.1699 min 081816029	0	0	0	0	173567	139803	0	0	0	0	0	29787.4	0	0	0	0	0	0	0	0	0	0	15336	0	0	0	0	0	0	0	0	0	0	0	0	0	0	0	0	0	0	0	0	0	0	0	0	0	0
Salicin	0	0	0	0	29954.8	24590.9	0	0	0	0	0	0	0	0	0	0	0	0	0	0	0	0	0	0	0	0	0	0	0	0	0	0	0	0	0	0	0	0	0	0	0	0	0	0	0	0	0	0	0
RI=2585.7, 16.3283 min 081816032	12844.8	12809	0	44719	162962	150844	0	0	0	39920.9	0	41219.8	0	0	0	0	0	0	0	0	0	27703.2	0	0	0	0	0	0	31500.9	0	0	0	0	0	14655.4	0	0	0	0	17237.6	35490.5	0	0	0	0	37019.4	0	0	0
RI=2597.7, 16.3802 min 082616028	17109.7	0	11670.6	60170.9	85101.7	49520.6	11283.7	0	0	62666.6	49513.8	55952.8	0	0	0	20193	0	39463.1	14249	0	0	36817.8	0	0	0	0	0	31234.2	35355	0	0	12412.6	0	0	25071.7	22244.4	0	0	0	25271.7	45256.6	0	0	28673	14168.2	49879.6	25324.7	24177.3	0
Arbutin (5TMS)	0	0	0	0	0	0	0	0	0	60615.8	0	65264.2	0	0	0	0	0	0	0	0	0	0	0	0	0	0	0	0	0	0	0	0	0	0	0	0	0	0	0	0	0	0	0	0	0	0	0	0	0
RI=2633.6, 16.5264 min 082316005	0	0	0	0	0	0	0	0	0	0	0	0	0	0	0	0	0	0	0	0	0	0	0	0	0	0	0	0	0	0	0	0	0	0	0	0	0	0	0	0	0	0	0	0	0	0	0	0	0
(EIQTMS_N12C_ATHL_1852.4_3161BN34_Dehyd	0	0	0	0	0	0	0	0	0	0	0	0	0	0	0	0	0	0	0	0	0	0	0	0	0	0	0	0	0	0	0	0	0	0	0	0	0	0	0	0	0	0	0	0	0	0	0	0	0
RI=2653.3, 16.6066 min 082316015	0	0	0	0	0	0	0	0	0	0	0	0	0	0	0	0	0	0	0	0	0	0	0	0	0	0	0	0	0	0	0	0	0	0	0	0	0	0	0	0	0	0	0	0	0	0	0	0	0
(EIQTMS_N12C_SD1_2650.9_3223BF23_Adenos	0	0	0	40692.9	423867	359195	0	0	0	0	0	0	0	0	0	0	0	0	0	0	0	0	6028.32	0	0	0	0	0	0	0	0	0	10593.1	0	0	0	0	0	21483.4	0	0	0	0	0	0	61804.2	0	39240.9	0
RI=2679.8, 16.7139 min 082316015	0	0	0	0	0	8598.41	0	0	0	0	0	0	0	0	0	0	0	0	0	0	0	0	0	0	0	0	0	0	0	0	0	0	0	0	0	0	0	0	0	0	0	0	0	0	0	0	0	0	0
Sucrose (tms derivative)	0	0	0	0	0	0	0	0	0	0	27830.5	0	0	0	0	0	0	0	0	0	0	0	0	0	0	0	0	0	5945.27	0	0	0	0	0	0	0	0	0	0	0	0	0	0	0	0	47591.1	0	25013.3	0
RI=2724.7, 16.8963 min 081816023	25554.8	0	0	0	373089	225148	0	0	0	0	50881	42477.8	0	0	0	23514.9	0	0	0	0	0	0	0	0	0	0	0	14340.1	17374.3	0	0	0	0	0	21403.6	22558.8	0	0	0	0	0	0	0	0	0	0	16116	0	0
(deoxyribose 3TMS?)	77237.6	0	0	41337.9	205440	139917	0	0	0	63545.8	130907	75636.8	0	0	0	0	0	0	0	0	0	0	0	0	0	0	0	0	0	0	0	0	0	0	57311.8	60649.4	0	0	0	0	0	0	0	0	0	0	0	0	0
Phloretin	18700	0	0	34795.9	57900	43840.2	0	0	0	19240.3	20122	46480.1	0	17317.2	5287.88	23254.1	10863.6	22505.2	20521.5	9279.25	20444.3	2544.84	13567.4	0	6928.5	16944.2	0	51401.8	29604.5	0	0	8868.18	0	9505.39	33607.9	44971.6	18584.8	17797	20372.7	32730.6	34065.9	27726.8	21788.3	6852.61	23615.9	25296.4	34018.9	12005.9	0
(1-Monooleoylglycerol trimethylsilyl et	0	0	0	0	0	0	0	0	0	21451.9	0	0	0	0	0	0	0	0	0	0	0	0	0	0	0	12380.1	0	17971	0	0	0	0	0	0	0	0	0	0	0	0	0	0	0	0	0	22274.5	0	0	0
(EIQTMS_N12C_OARPLAS_2783.6_3350DF06_[9	29083.8	39285.6	26615.3	112760	106496	141616	0	39492.9	25356.5	111037	91163.3	101677	0	32157.8	19904.8	52951.6	28701.5	77916.2	33253.5	41044.5	21977.8	64636.6	56538.6	20163.8	0	49386.1	30051.8	94448.6	67903.6	58868.1	19441.7	25728.8	32989.8	24247.8	70474.9	51815.1	45061.9	36038.7	42415.9	70831.9	93860.7	63200.3	36256	64264.1	41408.9	99581	63784.6	53233.2	29942.3
D-Turanose peak1 (heptakis tms)	0	25594.5	0	69532.4	243152	207980	0	0	21046.2	54501.8	65989.8	63074.6	0	34004.1	0	37164.3	0	41162.1	28028.6	26428.7	20148.7	40348.8	51784.3	0	0	32502.9	0	50769.3	38158.5	28198.6	0	24419.8	30466.1	0	41926.5	45121.2	35761.2	26006.3	30418.7	44395.5	51735.6	37130.8	0	38228.2	27391.5	59105.8	50142.1	41529.1	0
RI=2816.8, 17.2657 min 082616028	5.16486e+06	5.03391e+06	3.22942e+06	2.53198e+06	1.01212e+07	7.43164e+06	4.54197e+06	5.14139e+06	3.77325e+06	8.76568e+06	8.88121e+06	1.00994e+07	3.55158e+06	3.46685e+06	3.45193e+06	6.68247e+06	5.18668e+06	7.43769e+06	6.11452e+06	5.32895e+06	5.26896e+06	5.71049e+06	8.50723e+06	2.03555e+06	927946	7.32784e+06	3.87708e+06	6.8356e+06	5.65186e+06	3.36838e+06	3.73744e+06	5.63733e+06	4.72256e+06	1.50836e+07	6.64469e+06	4.44839e+06	4.41834e+06	5.23335e+06	5.85427e+06	5.01051e+06	9.69019e+06	6.64874e+06	4.28087e+06	6.79413e+06	4.65106e+06	3.57333e+07	1.56644e+07	1.83127e+07	4.18201e+06
RI=2850.8, 17.3950 min 081816029	0	0	0	0	0	0	0	0	0	0	0	0	0	0	0	0	0	0	0	0	0	0	0	0	0	0	0	0	0	0	0	0	0	0	0	0	0	0	0	0	0	0	0	0	0	0	0	0	0
RI=2873.4, 17.4811 min 081816029	21594.6	0	16235.8	0	211439	258001	0	0	0	0	42555.5	23002.5	0	0	0	0	0	0	0	0	0	0	0	0	0	0	0	0	20418.6	0	0	0	0	0	18928.4	19978.4	0	0	0	0	0	0	0	0	0	0	106614	0	0
RI=2944.9, 17.7528 min 081816029	0	0	0	44187.3	443594	427540	0	0	0	0	60886.4	0	0	0	0	0	0	0	0	0	0	0	0	0	0	17449.7	0	0	0	0	0	0	0	26761	0	0	0	0	12849.5	0	0	0	0	0	11709.4	40341.4	0	20358.8	0
RI=2968.9, 17.8440 min 081816029	25443.7	0	27792.4	105484	598597	131114	0	0	23010.7	43826.2	116365	57483.8	26763.8	23441.8	0	38611.9	24868	31709.2	20933.6	37236.4	24030.3	32404.8	13798.2	6028.9	0	57917.8	0	16540.3	0	0	0	15499.7	0	79527	19520.1	23538.2	17248	23725.7	49549.8	0	6923.78	0	39322.8	38028.7	33313.8	134798	0	60516.5	0
GSIL135	0	0	0	46471.2	434787	426567	0	0	0	0	60954	19597.4	0	0	9206.8	0	0	0	0	0	0	0	0	0	0	17677.2	0	0	0	0	0	0	0	25155.7	0	0	0	0	0	0	0	0	0	0	0	40286.4	0	0	0
RI=3011.1, 18.0102 min 082316015	0	0	0	19460	68375.5	65133.6	0	0	0	0	14595.8	0	0	12921	0	0	0	26908.7	0	0	0	0	0	19254	0	0	0	0	26128.3	0	0	0	0	20221.8	19923.4	0	0	0	0	0	36670	0	0	0	0	0	0	0	0
GSIL136	0	0	0	0	0	0	0	0	0	0	0	0	0	0	0	0	0	0	0	0	0	0	0	0	0	0	0	0	0	0	0	0	0	0	0	0	0	0	0	0	0	0	0	0	0	0	0	0	0
GSIL137	0	0	0	7395.62	0	71077.9	0	0	0	20876.5	0	0	0	0	0	0	18149.8	19221.4	0	0	0	13093.9	0	0	0	0	0	0	10151.8	26167.9	9575.84	0	0	0	26008.5	0	0	0	0	0	16596.1	0	0	1884.58	10901.2	10202.4	0	0	0
5'-Adenylic acid, pentakis(trimethylsil	0	0	0	0	0	0	0	0	0	0	0	0	0	0	0	0	0	0	0	0	0	0	0	0	0	0	0	0	0	0	0	0	0	0	0	0	0	0	0	0	0	0	0	0	0	0	0	0	0
Chlorogenic acid (tms derivative)	0	0	0	0	0	0	0	0	0	0	0	0	0	0	0	0	0	0	0	0	0	0	0	0	0	0	0	0	0	0	0	0	0	0	0	0	0	0	0	0	0	0	0	0	0	0	0	0	0
Quercetin (TMS)	0	0	0	54404.3	0	43617.3	0	0	0	0	0	0	0	0	0	0	0	19776.9	0	0	0	0	0	0	0	0	0	0	0	0	0	0	0	0	0	0	0	0	0	5941.36	23445	31294.8	0	0	0	0	0	0	13454.6
Raffinose (TMS)	0	0	0	0	0	0	0	0	0	0	0	0	0	0	0	0	0	0	0	0	0	0	0	0	0	0	0	0	0	0	0	0	0	0	0	0	0	0	0	0	0	0	0	0	0	0	0	0	0
RI=3509.5, 20.2103 min 082616028	302308	0	0	33948.5	362556	367787	0	0	0	0	0	0	0	0	0	0	0	0	0	0	0	0	0	0	0	0	0	0	0	0	0	0	0	0	0	0	0	0	0	0	0	0	48110.4	54864.6	0	0	0	0	0
Phloridzin (TMS)	0	0	0	0	0	0	0	0	0	0	0	0	0	0	0	0	0	0	0	0	0	0	0	0	0	0	0	0	0	0	0	0	0	0	0	0	0	0	0	0	0	0	0	0	0	0	0	0	0
RI=3520.8, 20.3033 min 081816029	0	0	0	0	262614	127544	0	0	0	0	0	0	0	0	0	0	0	0	0	0	0	0	0	0	0	0	0	0	0	0	0	0	0	0	0	0	0	0	0	0	0	0	0	0	0	0	0	0	0
RI=3532.5, 20.3991 min 081816029	0	0	0	0	0	0	0	0	0	0	0	0	0	0	0	0	0	0	0	0	0	0	0	0	0	0	0	0	0	0	0	0	0	0	0	0	0	0	0	0	0	0	0	0	0	0	0	0	0
RI=3564.5, 20.6623 min 081816029	0	0	0	0	66804.7	73126.7	0	0	0	0	0	0	0	0	0	0	0	0	0	0	0	0	0	0	0	0	0	0	0	0	0	0	0	0	0	0	0	0	0	0	0	0	0	0	0	0	0	0	0
RI=3586.0, 20.8389 min 081816029	0	0	0	0	0	17258.4	0	0	0	0	0	0	0	0	0	0	0	0	0	0	0	0	0	0	0	0	0	0	0	0	0	0	0	0	0	0	0	0	0	0	0	0	0	0	0	0	0	0	0
RI=3592.3, 20.8907 min 081816029	142398	133608	58615.3	33449.8	112708	112180	72048.9	106093	95777.3	57859.3	61079.9	94603	65665.7	64039.9	65471.9	59820.8	20539	60308.8	90190.8	65222	100344	44450.4	105026	24586.7	0	68852.6	78418.1	85698.4	64821	33049.5	64989.2	67029.4	78629.1	25229.3	64022.8	44999	67364.3	71044.8	81149.3	56096.2	46352.5	26708	68500.5	75120.1	70740.4	39800.7	42768.3	34280.4	68030.8
RI=3604.6, 20.9916 min 081816029	180138	182186	130276	41996.8	177711	125097	106717	151717	113481	106780	99563.1	118526	79113.9	81367	111166	80925.3	34536.1	87514.8	117674	109069	117143	86188.6	126206	26971.6	20556.3	125433	91546.1	101615	78790.9	49586.1	76981.2	87500.4	108096	35317.7	75481.6	63028.2	81033.4	91984.5	107667	66891.5	69735.1	33960.8	83663.1	141839	91731.1	61496.3	50051.9	57679.7	93740.1
RI=3645.0, 21.3234 min 081816029	0	0	0	0	0	0	0	0	0	0	0	0	0	0	0	0	0	0	0	0	0	0	0	0	0	0	0	0	0	0	0	0	0	0	0	0	0	0	0	0	0	0	0	0	0	0	0	0	0
[truncated: 5 more columns]

## Sheet: Polar-metabolites-RB
	DAY0						DAY1						DAY3						DAY7						DAY15						DAY21						DAY24						DAY28						DAY31
[Results Signal 1]	ASDNA1	ASDNA2	ASDNA3	ASDRB1	ASDRB2	ASDRB3	ASDNA1	ASDNA2	ASDNA3	ASDRB1	ASDRB2	ASDRB3	ASDNA1	ASDNA2	ASDNA3	ASDRB1	ASDRB2	ASDRB3	ASDNA1	ASDNA2	ASDNA3	ASDRB1	ASDRB2	ASDRB3	ASDNA1	ASDNA2	ASDNA3	ASDRB1	ASDRB2	ASDRB3	ASDNA1	ASDNA2	ASDNA3	ASDRB1	ASDRB2	ASDRB3	ASDNA1	ASDNA2	ASDNA3	ASDRB1	ASDRB2	ASDRB3	ASDNA1	ASDNA2	ASDNA3	ASDRB1	ASDRB2	ASDRB3	ASDNA1
	0NA1	0NA2	0NA3	0RB1	0RB2	0RB3	1NA1	1NA2	1NA3	1RB1	1RB2	1RB3	3NA1	3NA2	3NA3	3RB1	3RB2	3RB3	7NA1	7NA2	7NA3	7RB1	7RB2	7RB3	15NA1	15NA2	15NA3	15RB1	15RB2	15RB3	21NA1	21NA2	21NA3	21RB1	21RB2	21RB3	24NA1	24NA2	24NA3	24RB1	24RB2	24BR3	28NA1	28NA2	28NA3	28RB1	28RB2	28RB3	31NA1
(Tris(trimethylsilyl)borate)	0	0	0	88339.9	53696.6	71206.8	0	43167.7	0	54730.6	42280.5	70829.8	31506	65046.7	0	18969.7	0	0	25544.9	0	33914.9	47970.9	0	0	0	23653.5	34140.4	56165.7	55956.5	98993.4	41253.9	0	0	60659.5	0	42061.2	30714.9	0	0	0	45444.5	0	0	0	0	20480.9	28894.2	20792.1	34246.7
RI=1004.1, 6.4805 min 081816032	0	0	0	0	0	0	0	0	0	0	0	0	0	0	0	0	0	0	0	0	0	0	0	0	0	0	0	0	0	0	0	0	0	0	0	0	0	0	0	0	0	0	0	0	0	0	0	0	0
(oxalic acid)	0	0	0	0	0	0	0	0	0	0	0	0	0	0	0	108414	85349	77092.5	0	0	0	164707	40136.9	253882	0	0	0	0	20481.1	824273	0	0	0	83473.9	69836.3	863371	0	0	0	0	0	0	0	0	0	0	29829.2	0	0
Pyruvic acid (methoxamine, tms derivati	0	0	0	33794.7	0	0	0	0	0	0	27076.6	0	0	0	0	208605	0	137246	0	0	0	124642	67153.7	86104.8	0	0	0	27096.7	0	286527	0	0	0	0	22007.2	307943	0	0	0	25938.1	0	0	0	0	0	0	0	0	0
RI=1065.4, 7.0213 min 081816023	0	28575.4	26673.2	117046	104105	224164	0	0	0	289236	655076	1600335	0	0	0	60678.7	86228.1	178224	0	0	0	73587	22403.1	254931	14319.1	28683.4	0	0	20422.5	829734	21714.2	0	0	83209.4	72249.9	863137	0	22235.7	47503.7	29066.7	75615.2	50191.1	0	0	0	46565.5	30783.3	46297.1	0
(Lactic acid)	16394.2	24621.7	23515	102182	83559.8	196105	0	20712.4	0	259302	554787	1.40565e+06	0	16325.9	0	53478.3	44822.8	0	0	0	0	30238.6	14294.1	13457.9	0	26680.2	0	127923	63160.8	59459.4	0	15961	15961	156938	68913.9	38927.2	0	0	38104.8	23464.4	59897.9	44688.2	0	0	0	45330.9	13047.3	37815	0
Hexanoic acid, trimethylsilyl ester	0	0	0	28310	0	36297.8	0	0	0	46538	88791.2	221768	0	0	0	0	0	0	0	0	0	0	0	0	0	0	0	0	0	50449	0	0	0	0	0	51465.1	0	0	0	0	24287	0	0	0	0	0	0	0	0
RI=1090.6, 7.2438 min 081816023	0	0	0	0	0	0	0	0	0	0	0	0	0	0	0	0	0	0	0	0	0	0	0	0	0	0	0	0	0	0	0	0	0	0	33847.5	0	0	0	0	0	0	0	0	0	0	0	0	0	0
Butanoic acid, 2-(methoxyimino)-, trime	39493.6	32375.3	23459	67679.2	32066.4	0	33798.1	37664.7	48225.9	34180	0	82558.1	38614.5	24709.6	24892.4	0	26832.9	0	23288	0	0	84605.1	0	23412	0	35018.1	46589.2	321524	152089	154442	0	33880	33880	410871	166634	112912	0	0	33115.5	28036.7	43806.5	0	35391	39325.5	0	0	0	0	38968.7
l-Alanine, N-(trimethylsilyl)-, trimeth	0	0	0	0	0	0	0	0	0	0	0	0	0	0	0	0	0	0	0	0	0	0	0	0	0	0	0	0	0	0	0	0	0	0	0	0	0	0	0	0	0	0	0	0	0	0	0	0	0
RI=1123.1, 7.5311 min 082616028	0	0	0	0	0	0	0	0	0	0	0	0	0	0	0	0	0	0	0	0	0	0	0	0	0	0	0	0	0	0	0	0	0	0	0	0	0	0	0	0	0	0	0	0	0	0	0	0	0
Bis(trimethylsilyl)sarcosine	0	0	0	0	0	0	0	0	0	0	0	0	0	0	0	0	0	0	0	0	0	0	0	0	0	0	0	0	0	0	0	0	0	0	0	0	0	0	0	0	0	0	0	0	0	0	0	0	0
RI=1148.1, 7.7521 min 081816020	0	17544.2	0	0	0	14023.5	0	0	0	0	0	106164	0	0	0	211037	75810.2	0	0	0	0	33730.2	45263.1	29045.5	0	0	0	47180.1	121892	0	0	0	0	0	38337.2	0	0	17509.3	0	239267	0	0	0	0	27387.2	22708.9	0	82633.4	0
Butanoic acid, 3-[(trimethylsilyl)oxy]-	0	0	0	20000.6	0	0	0	0	0	37107	53686.1	194877	0	0	0	210490	76905.6	0	0	0	0	27716.3	33160.8	21725	0	0	0	29468.3	101149	0	0	0	0	0	29816.5	0	0	0	37501.8	194007	0	26562	0	0	0	17089.5	0	58499.4	0
(heptanoic acid tms)	22296	0	0	63362.1	48980.9	68010.1	0	0	0	168058	127629	39162.5	0	0	0	55583.8	40541.7	84725.2	0	0	0	186003	0	38780.6	0	0	18530	149995	227056	161372	67378.6	0	0	99237.4	197060	175083	0	0	287723	50033.2	231881	340285	0	0	0	0	199283	0	0
RI=1171.8, 7.9612 min 081816023	0	0	0	0	0	0	0	0	0	0	0	0	0	0	0	0	0	0	0	0	0	42121.2	0	0	0	0	0	0	0	0	0	0	0	0	15997.4	0	0	0	0	0	0	0	0	0	0	0	0	0	0
RI=1181.4, 8.0458 min 082616033	0	0	0	27488.9	0	0	0	0	0	0	0	0	0	0	0	27712.9	0	172146	0	0	0	57339.9	17590.7	0	0	0	0	64416.2	88715.6	81341.8	127513	0	0	90015	151762	45431.3	0	0	0	0	0	0	0	0	0	0	0	0	0
RI=1193.6, 8.1534 min 082316005	0	0	0	0	0	12179.4	0	0	0	0	0	0	0	0	0	0	0	0	0	0	0	0	0	0	0	0	0	0	0	0	0	0	0	0	0	0	0	0	0	0	0	0	0	0	0	0	0	0	0
(N,O-Bis(trimethylsilyl)hydroxylamine)	26798.3	0	25112.1	1.16411e+06	754299	927951	26144.9	0	0	73447.5	176220	923031	0	0	0	202478	57393.5	2.06261e+06	23447.8	30666.2	11848.1	33731.3	113085	0	0	0	0	0	0	0	1.04634e+06	31364.1	31364.1	0	294586	0	0	20149.3	11518.2	67692.9	0	35588.2	0	0	0	0	89055.9	70765.6	21336.1
RI=1202.7, 8.2316 min 081816023	0	0	0	0	0	0	0	0	0	0	0	0	0	0	0	0	0	0	0	0	0	0	0	0	0	0	0	0	0	0	0	0	0	0	0	0	0	0	0	0	0	0	0	0	0	0	0	0	0
Malonic acid (tms derivative)	32197.3	34394.6	28801.6	502638	327807	420342	34038	48368.5	25120.7	93284.9	82888.3	393012	29975.5	38320.4	26093	215962	70407.4	2.22711e+06	27789.8	38778.8	46044.3	103647	133368	37955.9	0	34577.3	42443.7	86416.5	71013.3	61484	1.63142e+06	38773.5	38773.5	57183.7	352738	42398.9	23050	25947.2	110221	79733.2	45850.3	79965.7	19745.4	0	23419.9	37550.8	100435	111103	32722.8
RI=1213.7, 8.3215 min 081816032	0	0	0	0	0	0	0	0	0	0	5514.98	0	0	0	0	0	0	0	0	0	0	0	0	0	0	0	0	0	0	0	0	0	0	18923.5	20680.9	0	0	0	0	0	0	0	0	0	0	0	0	0	0
L-Valine, N-(trimethylsilyl)-, trimethy	0	0	0	1.12983e+06	753868	930010	0	0	0	38321.3	180633	415604	0	0	0	0	0	28469.9	0	0	0	0	0	0	0	0	0	0	0	0	0	0	0	0	0	0	0	0	0	0	0	0	0	0	0	0	0	24858.8	0
RI=1239.9, 8.5343 min 081816023	0	0	0	0	0	0	0	0	0	0	0	0	0	0	0	0	0	0	0	0	0	0	0	0	0	0	0	0	0	0	0	0	0	0	0	0	0	0	0	0	0	0	0	0	0	0	0	0	0
Norvaline (2TMS)	0	0	0	0	0	0	0	0	0	0	0	0	0	0	0	0	0	0	0	0	0	0	0	0	0	0	0	0	0	0	0	0	0	0	0	0	0	0	0	0	0	0	0	0	0	0	0	0	0
(EIQTMS_N12C_ATHL_1249.2_3161BN29_[917;	0	17583.4	72094.6	86462.9	55101.4	60814.9	0	27788.8	26032.9	47326.5	0	68442.8	21437.1	24119.3	13913.8	0	85863.5	0	13954.9	0	20815.1	0	0	19442.7	22123.2	22440.2	21622.3	0	62743.2	20414.3	20967.4	13663.1	13663.1	55286.4	0	42741.7	18918.8	61148.8	0	22968.4	58901.6	0	70783.3	0	88089.6	16001.8	0	0	60625.1
Benzoic acid trimethylsilyl ester	0	0	0	0	0	0	0	0	0	0	0	0	0	0	0	0	0	0	0	0	0	0	0	0	0	0	0	0	0	0	0	0	0	0	0	0	0	0	0	0	0	0	0	0	0	0	0	0	0
RI=1258.3, 8.6844 min 081816029	23603.5	0	0	0	0	0	0	0	0	0	0	0	0	27827	0	0	0	0	0	22345.5	0	22927.2	0	0	0	0	0	0	32051.9	0	0	0	0	48841	26761.1	0	0	0	0	0	0	0	0	0	0	0	0	0	0
(octanoic acid)	40371.5	35897.5	30641	3.87656e+06	2.51029e+06	2.69939e+06	28376.9	37215.6	28616	94346.8	661074	2.92694e+06	35907.7	0	0	0	36668.9	32483	0	26126.6	27460.1	50801.2	0	0	26564.4	45448.9	33546.2	48656.2	48306.7	56372.6	37799.8	29667.4	29667.4	42452.1	49417.9	0	0	0	78609.2	0	136838	104456	22127.8	25752	20428.7	46245.3	0	90113.6	23175.8
Pipecolic acid (TMS)	0	0	0	0	0	0	0	0	0	0	0	0	0	0	0	0	0	0	0	0	0	0	0	0	0	0	0	0	0	0	0	0	0	0	0	0	0	0	0	0	0	0	0	0	0	0	0	0	0
L-Leucine, N-(trimethylsilyl)-, trimeth	0	0	0	0	0	0	0	0	0	0	0	0	0	0	0	0	0	0	0	0	0	0	0	0	0	0	0	0	0	0	0	0	0	0	0	0	0	0	0	0	0	0	0	0	0	0	0	0	0
Trimethylsilyl ether of glycerol	0	0	0	0	0	0	0	0	0	0	0	0	0	0	0	0	0	0	0	0	0	0	0	0	0	0	0	0	0	0	0	0	0	0	0	0	0	0	0	0	0	0	0	0	0	0	0	0	0
Phosphoric acid (tms derivative)	0	0	0	0	0	0	0	0	0	0	0	0	0	0	0	0	0	0	0	0	0	0	0	0	0	0	0	0	0	0	0	0	0	0	0	0	0	0	0	0	0	0	0	0	0	0	0	0	0
L-Isoleucine, N-(trimethylsilyl)-, trim	0	0	0	0	0	0	0	0	0	0	0	0	0	0	0	0	0	0	0	0	0	0	0	0	0	0	0	0	0	0	0	0	0	0	0	0	0	0	0	0	0	0	0	0	0	0	0	0	0
(Nicotinic acid-TMS)	0	0	0	0	0	0	0	0	0	0	0	0	0	0	0	0	0	0	0	0	0	0	0	0	0	0	0	0	0	0	0	0	0	0	0	0	0	0	0	0	0	0	0	0	0	0	0	0	0
L-Proline, 1-(trimethylsilyl)-, trimeth	0	0	0	0	0	0	0	0	0	0	0	0	0	0	0	0	0	0	0	0	0	0	0	0	0	0	0	0	0	0	0	0	0	0	0	0	0	0	0	0	0	0	0	0	0	0	0	0	0
(benzylacetic acid)	21060.3	0	0	42508.2	30991.2	29283.8	0	0	0	0	0	35078.6	0	29963.1	0	59928.2	0	0	0	0	0	313468	33064.5	0	0	0	0	324784	663119	641972	0	0	0	711639	811023	138338	0	0	0	0	30313.1	0	25873.1	0	0	0	29829.1	0	0
Maleic acid (2TMS)	304237	276471	266810	3.95228e+07	2.311e+07	2.57439e+07	233801	309471	241086	855962	6.11211e+06	2.69237e+07	292386	223103	197375	219489	264935	272530	197178	229037	218490	412491	78853.4	52434.1	223476	382867	273376	387608	357536	447013	280688	242642	242642	352566	414078	133842	179184	159071	610983	92775.5	1.22513e+06	939988	150462	204713	152240	432428	198611	773910	187281
Glycine, N,N-bis(trimethylsilyl)-, trim	0	0	0	118839	68107.6	73830.3	0	0	0	0	0	76899	0	0	0	0	0	0	0	0	0	0	0	0	0	0	0	0	0	0	0	0	0	0	0	0	0	0	0	0	0	0	0	0	0	0	0	0	0
Succinic acid (tms derivative)	0	0	0	0	0	0	0	0	0	0	0	0	0	0	0	0	0	0	0	0	0	0	0	0	0	0	0	0	0	0	0	0	0	0	0	0	27042.5	0	0	0	0	0	0	0	0	0	0	0	0
(like succinic acid)	0	0	0	0	0	0	0	0	0	0	0	0	0	0	0	0	0	0	0	0	0	0	0	0	0	0	0	9388.95	0	20503	0	0	0	0	0	0	0	0	0	0	0	0	0	0	0	0	0	0	0
Glyceric acid (3TMS)	21006.7	0	0	43397.5	31342.2	29682.4	0	0	0	0	23301.9	34559.6	0	32213.3	0	56351.8	0	0	0	0	0	311214	30714.5	0	0	0	0	324276	661536	634504	0	0	0	715527	809577	137937	0	0	0	15309.4	29781.7	0	25959.8	0	0	0	29161.5	0	0
(Pyrimidine, 2,4-bis[(trimethylsilyl)ox	0	0	0	0	0	0	0	0	0	0	0	0	0	0	0	0	0	0	0	0	0	0	0	0	0	0	0	0	0	0	0	0	0	0	0	0	0	0	0	0	0	0	0	0	0	0	0	0	0
Fumaric acid (tms derivative)	0	0	0	0	0	0	0	0	0	0	0	0	0	0	0	0	0	0	0	0	0	0	0	0	0	0	0	0	0	0	0	0	0	0	0	0	0	0	0	0	0	0	0	0	0	0	0	0	0
(nonanoic acid)	52041.1	35964.9	0	66801.4	0	34374.1	33654.5	29919.7	0	80705.9	52136.1	0	0	33905.3	0	0	0	0	0	43563.2	0	38385.3	0	31706.9	0	49910.9	0	27532.6	31724.6	43937.4	0	0	0	61335	49391.4	0	0	23132	27404.3	0	77262.8	68293.4	31274.6	35457.7	0	29712.3	26128.5	38899.5	0
Serine tritms	48350.7	0	0	77090.9	0	42363.1	33186.9	0	0	75083.4	61787	0	0	35311.8	0	0	0	0	0	0	0	32576.8	0	30261	0	49371.4	0	0	51102.6	65215.2	0	0	0	62120	45526	0	0	0	0	0	99975.9	73479.5	35294.4	34955.2	0	0	0	37987.3	0
Pipecolic acid (2TMS)	0	0	0	0	0	0	0	0	0	0	0	0	0	0	0	0	0	0	0	0	0	0	0	0	0	0	0	0	0	0	0	0	0	0	0	0	0	0	0	0	0	0	0	0	0	0	0	0	0
RI=1371.9, 9.5687 min 082616028	0	0	0	0	0	0	0	0	0	0	0	0	0	0	0	0	0	0	0	0	0	0	0	0	0	0	0	0	0	0	0	0	0	0	0	0	0	0	0	0	0	0	0	0	0	0	0	0	0
RI=1384.6, 9.6650 min 081816023	0	0	0	0	0	0	0	0	0	0	0	0	0	0	0	0	0	0	0	0	0	0	0	0	0	0	0	0	0	0	0	0	0	0	0	0	0	0	0	0	0	0	0	0	0	0	0	0	0
RI=1389.9, 9.7052 min 082316015	0	0	0	0	0	0	0	0	0	0	0	0	0	0	0	0	0	0	0	0	0	0	0	0	0	0	0	0	0	0	0	0	0	0	0	0	0	0	0	0	0	0	0	0	0	0	0	0	0
N,O,O-Tris(trimethylsilyl)-L-threonine	51799	33843.2	0	78107.5	22370.8	46929.3	38489.9	0	0	78817.6	65292.9	28250.2	0	38710.1	0	0	18002.9	0	0	31976.1	0	34153.1	0	30806.8	0	53023.9	0	28863.8	34583.8	44683.4	28496.8	0	0	62993.7	50650.1	0	0	22037.2	0	0	83712.2	76710.6	32592.7	35591.5	0	29787.6	23121.2	40069.3	0
4-methylcatechin	0	0	0	0	19917.3	0	0	0	0	0	0	0	0	0	0	0	0	0	0	0	0	0	0	0	0	0	0	0	0	0	0	0	0	0	32713.5	0	0	14661	0	0	0	0	0	0	0	0	0	0	0
Glutaric acid (2TMS)	0	0	0	0	0	0	0	0	0	0	0	0	0	0	0	0	0	0	0	0	0	0	0	0	0	0	0	0	0	0	0	0	0	0	0	0	0	0	0	0	0	0	0	0	0	0	0	0	0
(Hydrocinnamic acid, trimethylsilyl est	0	0	0	0	0	0	0	0	0	0	0	0	0	0	0	0	0	0	0	0	0	0	0	0	0	0	0	0	0	0	0	0	0	116910	31815.9	22796.6	0	0	0	0	0	0	0	0	0	0	0	0	0
B-alanine (3TMS)	0	0	0	0	0	0	0	0	0	0	0	0	0	0	0	0	0	0	0	0	0	0	0	0	0	0	0	0	0	0	0	0	0	0	0	0	0	0	0	0	0	0	0	0	0	0	0	0	0
(Mandelic acid (ditms))	0	0	0	0	0	0	0	0	0	0	0	0	0	0	0	0	0	0	0	0	0	0	0	0	0	0	0	0	0	0	0	0	0	51127.1	0	0	0	0	0	0	0	0	0	0	0	0	0	0	0
Erythrose peak 1 (TMSoxime)	0	0	0	0	0	0	0	0	0	0	0	0	0	0	0	0	0	0	0	0	0	0	0	0	0	0	0	0	0	0	0	0	0	0	0	0	0	0	0	0	0	0	0	0	0	0	0	0	0
L-Homoserine, tris(trimethylsilyl) deri	0	0	0	0	0	0	0	0	0	0	0	0	0	0	0	0	0	0	0	0	0	0	0	0	0	0	0	0	0	0	0	0	0	0	0	0	0	0	0	0	0	0	0	0	0	0	0	0	0
(decanoic acid TMS)	0	0	0	0	0	19417.5	0	0	0	0	0	0	0	0	0	0	0	0	0	0	0	0	0	0	0	0	0	0	0	0	0	0	0	0	0	0	0	0	0	0	0	0	0	0	0	0	0	0	0
Erythrose, O-methyloxime, tris-O-(trime	0	0	0	0	0	0	0	0	0	0	0	0	0	0	0	0	0	0	0	0	0	0	0	0	0	0	0	0	0	0	0	0	0	11623.7	0	0	0	0	0	0	0	0	0	0	0	0	0	0	0
Citramalic acid (?TMS)	0	0	0	0	0	0	0	0	0	0	0	0	0	0	0	0	0	0	0	0	0	0	0	0	0	0	0	0	0	0	0	0	0	0	0	0	0	0	0	0	0	0	0	0	0	0	0	0	0
Malic acid (tms derivative)	0	0	0	79608.6	38431.1	78873	0	0	0	0	0	37954.9	0	0	0	0	0	0	0	0	0	0	0	0	0	0	0	0	0	29987.3	0	0	0	0	0	0	0	0	0	0	0	0	0	0	0	0	0	0	0
(Adipic acid)	0	0	0	0	0	0	0	0	0	0	0	16147.5	0	0	0	0	0	0	0	0	0	0	0	0	0	0	0	0	0	0	0	0	0	0	0	0	0	0	0	0	0	0	0	0	0	0	0	0	0
Erythritol (tms derivative)	0	0	0	0	0	0	0	0	0	0	0	0	0	0	0	0	0	0	0	0	0	0	0	0	0	0	0	0	0	0	0	0	0	0	0	0	0	0	0	0	0	0	0	0	0	0	0	0	0
Benzoic acid, 2-[(trimethylsilyl)oxy]-,	0	0	0	0	0	0	0	0	0	0	0	0	0	0	0	0	0	0	0	0	0	0	0	0	0	0	0	0	0	0	0	0	0	0	0	0	0	0	0	0	0	0	0	0	0	0	0	0	0
RI=1521.9, 10.6424 min 081816029	0	0	0	40475.6	0	0	0	0	0	0	0	49752.8	0	0	0	0	0	0	0	0	0	0	0	0	0	0	0	0	0	39511.6	0	0	0	0	0	0	0	0	0	0	0	0	0	0	0	0	0	0	0
L-Aspartic acid, N-(trimethylsilyl)-, b	0	0	0	0	0	0	0	0	0	0	0	0	0	0	0	0	0	0	0	0	0	0	0	0	0	0	0	0	0	0	0	0	0	0	0	0	0	0	0	0	0	0	0	0	0	0	0	0	0
L-Methionine, N-(trimethylsilyl)-, trim	0	0	0	71245.8	34019.2	49351.2	0	0	0	0	60993.1	102910	0	0	12748.4	0	0	0	0	0	0	0	0	0	0	0	0	10256.8	0	63424.6	0	0	0	0	0	0	0	0	0	0	0	0	0	0	0	0	0	0	0
L-Proline, 5-oxo-1-(trimethylsilyl)-, t	0	0	0	0	0	0	0	0	0	0	0	0	0	0	0	0	0	0	0	0	0	0	0	0	0	0	0	0	0	0	0	0	0	0	0	0	0	0	0	0	0	0	0	0	0	0	0	0	0
Hydroxyproline (tms derivative)	0	0	0	0	0	0	0	0	0	0	0	0	0	0	0	0	0	0	0	0	0	0	0	0	0	0	0	0	0	0	0	0	0	0	0	0	0	0	0	0	0	0	0	0	0	0	0	0	0
GABA (tritms)	0	0	0	0	0	0	0	0	0	0	0	0	0	0	0	0	0	0	0	0	0	0	0	0	0	0	0	0	0	0	0	0	0	0	0	0	0	0	0	0	0	0	0	0	0	0	0	0	0
Cinnamic acid (TMS)	0	0	0	0	0	0	0	0	0	0	0	0	0	0	0	0	0	0	0	0	0	0	0	0	0	0	0	0	0	0	0	0	0	0	0	0	0	0	0	0	0	0	0	0	0	0	0	0	0
RI=1551.4, 10.8417 min 082316015	0	0	0	0	0	0	0	0	0	0	0	6361.44	0	17193.6	0	0	0	0	0	0	0	0	0	0	0	0	0	0	0	0	0	0	0	0	0	0	0	0	0	0	0	0	0	0	0	0	0	0	0
Alanine, phenyl-, trimethylsilyl ester,	0	0	0	0	0	0	0	0	0	0	0	0	0	0	0	0	0	0	0	0	0	0	0	0	0	0	0	0	0	0	0	0	0	0	0	0	0	0	0	0	0	0	0	0	0	0	0	0	0
(EIQTMS_N12C_NID1_1542.3_1267BK12_[786;	0	0	0	0	0	0	0	0	0	0	0	0	0	0	0	0	0	0	0	0	0	0	0	0	0	0	0	0	0	0	0	0	0	0	0	0	0	0	0	0	0	0	0	0	0	0	0	0	0
L-Cysteine, N,S-bis(trimethylsilyl)-, t	0	0	0	0	0	0	0	0	0	0	0	0	0	0	0	0	0	0	0	0	0	0	0	0	0	0	0	0	0	0	0	0	0	0	0	0	0	0	0	0	0	0	0	0	0	0	0	0	0
Threonic acid (?TMS)	0	0	0	0	0	0	0	0	0	0	0	0	0	0	0	0	0	0	0	0	0	0	0	0	0	0	0	0	0	0	0	0	0	0	0	0	0	0	0	0	0	0	0	0	0	0	0	0	0
2-oxo-glutaric acid (methoximino, ditms	0	0	0	0	0	0	0	0	0	0	0	0	0	0	0	0	0	0	0	0	0	0	0	0	0	0	0	0	0	0	0	0	0	0	0	0	0	0	0	0	0	0	0	0	0	0	0	0	0
L-Asparagine, N,N2-bis(trimethylsilyl)-	0	0	0	0	0	0	0	0	0	0	0	0	0	0	0	0	0	0	0	0	0	0	0	0	0	0	0	0	0	0	0	0	0	0	0	0	0	0	0	0	0	0	0	0	0	0	0	0	0
Pimelic acid (2TMS)	0	0	0	19601.9	0	0	0	0	0	0	0	23130	0	0	0	0	0	0	0	0	0	0	0	0	0	0	0	0	0	0	0	0	0	0	0	0	0	0	0	0	0	0	0	0	0	0	0	0	0
L-Arginine (tms derivative)	0	0	0	0	0	0	0	0	0	0	0	0	0	0	0	0	0	0	0	0	0	0	0	0	0	0	0	0	0	0	0	0	0	0	0	0	0	0	0	0	0	0	0	0	0	0	0	0	0
Glutamic acid (tms derivative)	0	0	0	0	0	0	0	0	0	0	0	0	0	0	0	0	0	0	0	0	0	0	0	0	0	0	0	0	0	0	0	0	0	0	0	0	0	0	0	0	0	0	0	0	0	0	0	0	0
Benzoic acid, 4-[(trimethylsilyl)oxy]-,	0	0	0	0	0	0	0	0	0	0	0	0	0	0	0	0	0	0	0	0	0	0	0	0	0	0	0	0	0	0	0	0	0	0	0	0	0	0	0	0	0	0	0	0	0	0	0	0	0
RI=1638.1, 11.4122 min 081816032	0	0	0	0	0	0	0	0	0	0	0	0	0	0	0	0	0	0	0	0	0	0	0	0	0	0	0	0	0	0	0	0	0	0	0	0	0	0	0	0	0	0	0	0	0	0	0	0	0
N,O-Bis(trimethylsilyl)-L-phenylalanine	0	0	0	0	0	0	0	0	0	0	0	0	0	0	0	0	0	0	0	0	0	0	0	0	0	0	0	0	0	0	0	0	0	0	0	0	0	0	0	0	0	0	0	0	0	0	0	0	0
(p-Hydroxyphenylacetic acid (tms))	0	0	0	0	0	0	0	0	0	0	0	0	0	0	0	22129.5	0	62396.7	0	0	0	0	0	0	0	0	0	0	0	0	47108.4	0	0	0	31259.8	0	0	0	0	0	0	0	0	0	0	0	0	0	0
Dodecanoic acid (TMS)	0	0	0	0	0	0	0	0	0	0	0	0	0	0	0	0	0	0	0	0	0	0	0	0	0	0	0	0	0	0	0	0	0	0	0	0	0	0	0	0	0	0	0	0	0	0	0	0	0
Tartaric acid, bis-O-(trimethylsilyl)-,	0	0	0	0	0	0	0	0	0	0	0	0	0	0	0	0	0	0	0	0	0	0	0	0	0	0	0	0	0	0	0	0	0	0	0	0	0	0	0	0	0	0	0	0	0	0	0	0	0
d-Xylose peak 1 (tms, methoxamine deriv	0	0	0	0	0	0	0	0	0	0	0	0	0	25096.5	0	13335.7	0	49944.2	0	0	0	0	0	0	0	0	0	0	0	0	43522.9	0	0	0	0	0	0	0	0	0	0	0	0	0	0	0	0	0	0
Arabinose (methoxamino, tms derivative)	0	0	0	61214.9	30229.9	24376.4	0	0	0	0	0	23402.6	0	39271.1	0	27687.5	0	66153.9	0	0	0	0	0	0	0	0	0	0	0	0	46650.4	0	0	0	31229.8	0	0	0	0	0	0	0	0	0	0	0	0	0	0
d-Ribose, 2,3,4,5-tetrakis-O-(trimethyl	0	0	0	117183	40544.1	98089.9	0	0	0	233282	135663	116209	0	39119.2	0	24369.9	0	66142.6	0	0	0	0	0	0	0	0	0	0	0	0	46650.2	0	0	0	30230.7	0	0	0	0	0	0	0	0	0	0	0	0	0	0
RI=1717.4, 11.9122 min 081816029	0	0	0	0	0	0	0	0	0	0	0	0	0	0	1979.88	0	0	0	0	0	0	0	0	0	0	0	0	0	0	15458.7	0	0	0	0	0	0	0	0	0	0	0	0	0	0	0	0	0	0	0
(dithioerythritol??)	0	0	0	46318.5	0	53083.7	0	0	0	26339.8	0	52442.3	0	0	0	0	0	0	0	0	0	0	0	0	0	0	0	0	0	0	0	0	0	0	0	0	0	0	0	0	0	0	0	0	0	0	0	15397	0
RI=1733.1, 12.0073 min 081816029	0	0	0	0	0	34356.9	0	0	0	0	0	0	0	0	0	0	0	0	0	0	0	0	0	0	0	0	0	0	0	0	0	0	0	0	0	0	0	0	0	0	0	0	0	0	0	0	0	0	0
Rhamnose peak 1(TMSoxime)	0	0	0	0	0	15725.2	0	0	0	0	0	0	0	0	0	0	0	0	0	0	0	0	0	0	0	0	0	0	0	0	0	0	0	0	0	0	0	0	0	0	0	0	0	0	0	0	0	0	0
Arabinitol/Xylitol	0	0	0	103415	43004.2	145564	0	0	0	35461.7	0	0	0	0	0	0	0	0	0	0	0	0	0	0	0	0	0	0	0	0	0	0	0	0	0	0	0	0	0	0	0	0	0	0	0	0	0	0	0
Rhamnose peak 2 (TMSoxime)	0	0	0	0	10458.8	0	0	0	0	0	0	13095.3	0	17762.7	0	0	0	0	0	0	0	0	0	0	0	0	0	0	0	0	0	0	0	0	0	0	0	0	0	0	0	0	0	0	0	0	0	0	0
Adonitol (TMSoxime)	0	0	0	0	0	0	0	0	0	0	0	0	0	0	0	0	0	0	0	0	0	0	0	0	0	0	0	0	0	0	0	0	0	0	0	0	0	0	0	0	0	0	0	0	0	0	0	0	0
Putrescine (4TMS)	0	0	0	0	0	0	0	0	0	0	0	0	0	0	0	0	0	0	0	0	0	0	0	0	0	0	0	0	0	0	0	0	0	0	0	0	0	0	0	0	0	0	0	0	0	0	0	0	0
Fucose peak 1 (TMSoxime)	0	0	0	0	0	0	0	0	0	0	0	0	0	0	0	0	0	0	0	0	0	0	0	0	0	0	0	0	0	0	0	0	0	0	0	0	0	0	0	0	0	0	0	0	0	0	0	0	0
RI=1750.8, 12.1140 min 081816029	0	0	0	0	0	0	0	0	0	10529.3	0	15773.5	0	0	0	0	0	0	0	0	0	0	0	0	0	0	0	0	0	0	0	0	0	0	0	0	0	0	0	0	0	0	0	0	0	0	0	0	0
cis-Aconitic acid (3TMS)	0	0	0	0	0	0	0	0	0	0	0	0	0	0	0	0	0	0	0	0	0	0	0	0	0	0	0	0	0	0	0	0	0	0	0	0	0	0	0	0	0	0	0	0	0	0	0	0	0
RI=1754.9, 12.1394 min 082316005	0	0	0	46419.5	0	53431.3	0	0	0	0	0	46654	0	0	0	0	0	0	0	0	0	15746.2	0	0	0	0	0	0	0	0	0	0	0	0	30523.6	0	0	0	0	0	0	0	0	0	0	0	0	16221.2	0
(Hydrocinnamic acid, p-(trimethylsiloxy	0	0	0	0	0	0	0	0	0	0	0	0	0	0	0	0	0	0	0	0	0	0	0	0	0	0	0	0	0	0	0	0	0	0	0	0	0	0	0	0	0	0	0	0	0	0	0	0	0
Glycerol 3-phosphate (4TMS)	0	0	0	0	0	0	0	0	0	0	0	0	0	0	0	0	0	0	0	0	0	0	0	0	0	0	0	0	0	0	0	0	0	0	0	0	0	0	0	0	0	0	0	0	0	0	0	0	0
(Arabinofuranose, 1,2,3,5-tetrakis-O-(t	0	0	0	28071	0	0	0	0	0	0	0	0	0	0	0	0	0	0	0	0	0	0	0	0	0	0	0	0	0	0	0	0	0	0	0	0	0	0	0	0	0	0	0	0	0	0	0	0	0
RI=1797.6, 12.3974 min 081816023	0	0	0	40796	23479.1	0	0	0	0	0	0	28512.9	0	0	0	0	0	0	0	0	0	0	0	0	0	0	0	0	0	0	0	0	0	0	0	0	0	0	0	0	0	0	0	0	0	0	0	0	0
RI=1799.4, 12.4084 min 082616028	0	0	0	39385.1	0	19796.4	0	0	0	0	0	0	0	0	0	0	0	0	0	0	0	0	0	0	0	0	0	0	0	0	0	0	0	0	0	0	0	0	0	0	0	0	0	0	0	0	0	0	0
(EIQTMS_N12C_NID1_1774.7_1248BK08_[920;	0	0	0	0	0	0	0	0	0	0	0	0	0	0	0	0	0	0	0	0	0	0	0	0	0	0	0	0	0	0	0	0	0	0	0	0	0	0	0	0	0	0	0	0	0	0	0	0	0
Shikimic acid (tms derivative)	0	0	0	0	0	0	0	0	0	0	0	0	0	0	0	0	0	0	0	0	0	0	0	0	0	0	0	0	0	0	0	0	0	0	0	0	0	0	0	0	0	0	0	0	0	0	0	0	0
3-phospoglyceric acid (TMS)	0	0	0	0	0	0	0	0	0	0	0	0	0	0	0	0	0	0	0	0	0	0	0	0	0	0	0	0	0	0	0	0	0	0	0	0	0	0	0	0	0	0	0	0	0	0	0	0	0
RI=1826.5, 12.5650 min 082316015	133.16	0	0	42043.5	0	0	0	0	0	0	0	17300.4	0	0	0	0	0	0	0	0	0	0	0	0	0	0	0	0	0	0	0	0	0	0	0	0	0	0	0	0	0	0	0	0	0	0	0	0	0
L-Ornithine, N2,N5,N5-tris(trimethylsil	0	0	0	0	0	0	0	0	0	0	0	0	0	0	0	0	0	0	0	0	0	0	0	0	0	0	0	0	0	0	0	0	0	0	0	0	0	0	0	0	0	0	0	0	0	0	0	0	0
Isocitric acid (tms derivative)	0	0	0	0	0	0	0	0	0	0	0	0	0	0	0	0	0	0	0	0	0	0	0	0	0	0	0	0	0	0	0	0	0	0	0	0	0	0	0	0	0	0	0	0	0	0	0	0	0
Citric acid (tms derivative)	0	0	0	182471	65200.9	47600.2	0	0	0	0	0	30205.6	0	0	0	0	0	0	0	0	0	0	0	0	0	0	0	0	0	0	0	0	0	0	0	0	0	0	0	0	0	0	0	0	0	0	0	0	0
(EIQTMS_N12C_SCA_1852.6_3147BF23_[931;	0	0	0	371713	142010	163034	0	0	0	0	0	158678	0	0	0	0	0	0	0	0	0	61368.3	0	0	0	0	0	20060	43425.6	0	0	0	0	0	18695	0	0	0	0	0	0	0	0	0	0	0	0	0	0
RI=1852.7, 12.7162 min 081816012	0	0	0	522017	208053	1.84597e+06	0	0	0	0	0	225850	0	0	0	0	0	0	0	0	0	35436.4	0	0	0	0	0	14613.9	27327	0	0	0	0	0	0	0	0	0	0	0	0	0	0	0	0	0	0	0	0
Pinitol (TMS)	0	0	0	0	0	0	0	0	0	0	0	0	0	0	0	0	0	0	0	0	0	0	0	0	0	0	0	0	0	0	0	0	0	0	0	0	0	0	0	0	0	0	0	0	0	0	0	0	0
Quinic acid (tms derivative)	0	0	0	0	0	0	0	0	0	0	0	0	0	0	0	0	0	0	0	0	0	0	0	0	0	0	0	0	0	0	0	0	0	0	0	0	0	0	0	0	0	0	0	0	0	0	0	0	0
D-Fructose, 1,3,4,5,6-pentakis-O-(trime	0	0	0	0	0	0	0	0	0	0	0	0	0	0	0	0	0	0	0	0	0	0	0	0	0	0	0	0	0	0	0	0	0	0	0	0	0	0	0	0	0	0	0	0	0	0	0	0	0
(EIQTMS_N12C_ATHL_1898.3_3038BN25_[908;	0	0	0	4.50722e+06	2.73246e+06	3.60652e+06	0	0	0	274157	62514.9	2.14416e+06	0	0	0	0	17168.7	0	0	0	0	71963.6	0	0	0	0	0	34553.3	65709.6	0	0	0	0	0	52847.8	0	0	0	0	0	22169.7	0	0	0	0	0	0	0	0
d-Glucose, 2,3,4,5,6-pentakis-O-(trimet	0	0	0	6.03646e+07	3.13925e+07	4.70909e+07	0	0	0	0	436658	2.37376e+07	0	0	0	0	0	0	0	0	0	48633.7	0	0	0	0	0	0	40873.5	0	0	0	0	0	36689.1	0	0	0	0	0	0	0	0	0	0	0	0	0	0
L-Lysine, N2,N6,N6-tris(trimethylsilyl)	0	0	0	608447	303172	404594	0	0	0	0	0	221212	0	0	0	0	0	0	0	0	0	0	0	0	0	0	0	0	0	0	0	0	0	0	0	0	0	0	0	0	0	0	0	0	0	0	0	0	0
Cinnamic acid, p-(trimethylsiloxy)-, tr	0	0	0	512213	310263	415242	0	0	0	0	0	251402	0	0	0	0	0	0	0	0	0	0	0	0	0	0	0	0	0	0	0	0	0	0	0	0	0	0	0	0	0	0	0	0	0	0	0	0	0
L-Tyrosine, N,O-bis(trimethylsilyl)-, t	0	0	0	3.75402e+06	2.28347e+06	3.00476e+06	0	0	0	74963.6	69944.3	1.81529e+06	0	0	0	0	0	0	0	0	0	0	0	0	0	0	0	0	0	0	0	0	0	0	0	0	0	0	0	0	0	0	0	0	0	0	0	0	0
D-Mannitol, 1,2,3,4,5,6-hexakis-O-(trim	0	0	0	6.58373e+07	4.19332e+07	5.50306e+07	15726.4	16294.9	21426.6	1.26605e+06	1.09716e+06	3.33362e+07	0	0	0	32646.7	0	0	0	0	0	144073	19046.9	0	0	32025.9	21967.2	63429.8	93141	36560.7	14438.5	0	0	0	81250.1	0	0	0	59461	30804.3	132322	106660	0	0	0	27503	0	122908	0
Sorbitol (tms derivative)	0	0	0	4.60328e+07	6.81702e+06	3.83178e+07	0	0	0	896531	802817	4.88773e+06	0	0	0	0	0	0	0	0	0	109017	0	0	0	0	0	48032.8	72429.1	24269.4	4602.06	0	0	0	63514.5	0	0	0	43538.1	25148.8	94575.9	78926.2	0	0	0	0	0	87069.7	0
L-Ascorbic acid, 2,3,5,6-tetrakis-O-(tr	0	7811.93	29529.2	3.03167e+07	1.44133e+07	2.08844e+07	9036.27	21076.2	34852.5	339647	334560	1.05357e+07	0	0	0	54929.6	29881	0	0	0	0	225380	32381.7	0	0	50722.6	38118.7	102800	148886	49366.9	19925.2	0	0	40834.6	128088	17182.4	0	0	91539	52645.7	189749	148519	0	0	0	43727	0	188473	0
(EIQTMS_N12C_SD2_1997.2_3237BF23_Galact	0	0	0	785835	312095	428691	0	0	0	261911	79121.1	204553	0	0	0	41776.2	0	0	0	0	0	136143	0	0	0	0	0	82625.2	64880.5	0	0	0	0	0	37005.3	0	0	0	0	0	0	0	0	0	0	0	0	101749	0
(another inositol??)	0	0	0	2.01117e+06	897861	1.11853e+06	0	0	0	0	0	0	0	0	0	0	0	0	0	0	0	0	0	0	0	0	0	0	0	0	0	0	0	0	0	0	0	0	0	0	0	0	0	0	0	0	0	0	0
Pantothenic acid, O,O,O-tris(trimethyls	0	0	0	803179	357382	542085	0	0	0	21892.4	0	261522	0	0	0	0	0	0	0	0	0	0	0	0	0	0	0	0	0	0	0	0	0	0	0	0	0	0	0	0	0	0	0	0	0	0	0	0	0
RI=2009.8, 13.5921 min 081816029	0	0	0	0	0	0	0	0	0	0	0	0	0	0	0	0	0	0	0	0	0	0	0	0	0	0	0	0	0	0	0	0	0	0	0	0	0	0	0	0	0	0	0	0	0	0	0	0	0
D-Gluconic acid, 2,3,4,5,6-pentakis-O-(	0	0	0	0	0	51659	0	0	0	0	0	0	0	0	0	0	0	0	0	0	0	15214.9	0	0	0	0	0	0	0	0	0	0	0	0	0	0	0	0	0	0	0	0	0	0	0	0	0	0	0
Hexadecanoic acid, trimethylsilyl ester	0	0	0	162284	0	103675	0	0	0	0	0	0	0	0	0	0	0	0	0	0	0	0	0	0	0	0	0	0	0	0	0	0	0	0	0	0	0	0	0	0	0	0	0	0	0	0	0	0	0
GSIL67	0	0	0	0	24458.8	0	0	0	0	0	0	20342.7	0	0	0	0	0	0	0	0	0	0	0	0	0	0	0	0	0	0	0	0	0	0	0	0	0	0	0	0	0	0	0	0	0	0	0	0	0
scyllo-inositol (6TMS)	0	0	0	452311	102146	361684	0	0	0	117693	130604	148989	0	0	0	0	0	0	0	0	0	29295.8	0	0	0	0	0	0	19677.4	31875.5	0	0	0	0	31518.2	0	0	0	51144	0	106002	116691	0	0	0	49536.1	19947.5	100023	0
Mucic acid (6TMS)	0	0	0	456915	101664	313284	0	0	0	120820	129815	145894	0	0	0	0	0	0	0	0	0	39659.9	0	0	0	0	0	0	0	29047	0	0	0	0	30070.6	0	0	0	55117.8	0	113866	120892	0	0	0	68919	0	99842.6	0
Ferulic acid, trimethylsiloxy, trimethy	0	0	0	0	0	0	0	0	0	0	0	0	0	0	0	0	0	0	0	0	0	0	0	0	0	0	0	0	0	0	0	0	0	0	0	0	0	0	0	0	0	0	0	0	0	0	0	0	0
Inositol, 1,2,3,4,5,6-hexakis-O-(trimet	0	0	0	0	0	0	0	0	0	0	0	0	0	0	0	0	0	0	0	0	0	0	0	0	0	0	0	0	0	0	0	0	0	0	0	0	0	0	0	0	0	0	0	0	0	0	0	0	0
Caffeic acid (3TMS)	0	0	0	0	0	0	0	0	0	0	0	0	0	0	0	0	0	0	0	0	0	0	0	0	0	0	0	0	0	0	0	0	0	0	0	0	0	0	0	0	0	0	0	0	0	0	0	0	0
Linoleic acid (TMS)	0	0	0	91348.4	65273.8	71155.3	0	0	0	0	0	61527.1	0	0	0	26303.1	0	0	0	0	0	0	0	0	0	0	0	0	0	0	0	0	0	0	16983.1	0	0	0	0	0	0	0	0	0	0	0	0	0	0
Oleic acid, trimethylsilyl ester	0	0	0	0	0	0	0	0	0	0	0	0	0	0	0	0	0	0	0	0	0	0	0	0	0	0	0	0	0	0	0	0	0	0	0	0	0	0	0	0	0	0	0	0	0	0	0	0	0
Octadecanoic acid (TMS)	0	0	0	2.22538e+06	615421	1.7307e+06	0	0	0	1.18861e+06	850400	884477	0	0	0	21035.1	28925.1	16208.1	0	0	0	83864.5	0	0	0	0	0	10927.5	0	0	0	0	0	0	0	0	0	0	54903.3	0	90238.3	156518	0	0	0	0	0	37868.4	0
L-Tryptophan, N,1-bis(trimethylsilyl)-,	0	0	0	0	0	19584.8	0	0	0	0	0	0	0	0	0	0	0	0	0	0	0	0	0	0	0	0	0	0	0	0	0	0	0	0	0	0	0	0	0	0	0	0	0	0	0	0	0	0	0
RI=2249.1, 14.8063 min 081816032	0	0	0	0	0	0	0	0	0	0	0	0	0	0	0	0	0	0	0	0	0	0	0	0	0	0	0	0	0	0	0	0	0	0	0	0	0	0	0	0	0	0	0	0	0	0	0	0	0
Sinapic acid (TMS)	0	0	0	0	0	0	0	0	0	0	0	0	0	0	0	0	0	0	0	0	0	0	0	0	0	0	0	0	0	0	0	0	0	0	0	0	0	0	0	0	0	0	0	0	0	0	0	0	0
RI=2264.5, 14.8808 min 082316005	0	0	0	43041.2	12999.9	30753.3	0	0	0	0	0	0	0	0	0	0	0	0	0	0	0	0	0	0	0	0	0	0	0	0	0	0	0	0	0	0	0	0	0	0	0	0	0	0	0	0	0	0	0
RI=2269.1, 14.9027 min 082616028	0	30828.4	103890	254072	107458	276879	24200.5	0	77238.2	128156	66273	97226.2	0	0	0	0	24230.7	0	0	0	0	40381.4	0	0	31809.6	138289	31770.1	39197.8	0	0	0	66468.3	66468.3	0	0	0	50084.3	0	0	0	0	0	0	53937.8	0	0	0	0	33051.7
RI=2293.6, 15.0211 min 082616028	0	0	0	125459	51322.9	52389.8	0	0	0	0	0	33504.6	0	0	0	0	100.37	0	0	0	0	0	0	0	0	0	0	0	0	0	0	0	0	0	0	0	0	0	0	0	0	0	0	0	0	0	0	0	0
(EIQTMS_N12C_NID1_3140.6_1334BV19_[Diga	0	0	0	72333.7	31807.9	0	0	0	0	0	0	0	0	0	0	0	0	0	0	0	0	0	0	0	0	0	0	0	0	0	0	0	0	0	3042.33	0	0	0	0	0	0	0	0	0	0	0	0	2546.49	0
BGSIL61	0	0	0	125729	50541.9	53034.4	0	0	0	0	0	32490.3	0	0	0	0	0	0	0	0	0	0	0	0	0	0	0	0	0	0	0	0	0	0	0	0	0	0	0	0	0	0	0	0	0	0	0	0	0
(EIQTMS_N12C_LJAF_3142.1_2236BN50_[Diga	146680	276987	400148	1.07736e+06	513921	695189	204987	18491.1	294826	448313	504762	506123	32062.7	152537	137905	142729	153733	130583	238606	60345	99783.1	351965	48584.3	29360.7	196143	404106	152786	340608	291053	426890	0	282723	282723	276222	360300	51073.6	245547	48205.6	350582	33658.7	547190	425811	109640	233430	154397	305110	301305	395336	179647
GSIL84	0	0	0	26319.2	0	0	0	0	0	0	0	0	0	0	0	0	0	0	0	0	0	0	0	0	0	0	0	0	0	0	0	0	0	0	0	0	0	0	0	0	0	0	0	0	0	0	0	0	0
Phenyl Beta-D-Glucopyranoside	0	0	0	0	0	0	0	0	0	0	0	0	0	0	0	0	0	0	0	0	0	0	0	0	0	0	0	0	0	0	0	0	0	0	0	0	0	0	0	0	0	0	0	0	0	0	0	0	0
RI=2386.9, 15.4545 min 082616028	53571.7	46369.2	25781.5	271469	111937	89612.2	44950.5	0	13168.6	25799	26562.5	34405.9	22063.4	64495.7	38345.5	0	0	38059.4	40616.2	39520.1	19845.4	0	0	0	38235	24806.8	35029.6	0	0	0	0	32016.4	32016.4	0	0	0	27955	23536.8	0	0	42537.5	0	32024.6	36495.2	0	0	34890.8	34859.9	0
like (2-O-Glycerol-.alpha.-d-galactopyr	0	0	0	495870	184217	166007	0	0	0	0	0	0	0	14667.8	0	0	0	0	0	0	0	0	0	0	0	0	0	0	0	0	0	0	0	0	0	0	0	0	0	0	0	0	0	0	0	0	0	0	0
RI=2409.9, 15.5592 min 081816029	0	0	0	125454	0	0	0	0	0	28730.2	0	0	0	0	0	33502.2	62415.1	0	0	0	0	409576	0	44831.1	0	0	0	372564	268413	427521	0	0	0	313975	339642	0	0	0	792840	0	1.35768e+06	1.84342e+06	0	0	0	210710	232071	408663	0
RI=2422.3, 15.6142 min 081816029	0	0	0	16943.8	0	13340.9	0	0	0	0	0	0	0	0	0	0	0	0	0	0	0	0	0	0	0	0	0	0	0	0	0	0	0	0	0	0	0	0	0	0	0	24181.2	0	0	0	0	0	0	0
RI=2429.9, 15.6479 min 082616028	0	0	0	88286.9	0	0	0	0	0	0	22108	0	0	0	0	49512.4	74304.2	0	0	0	0	413193	0	49418.6	0	0	0	383097	274753	456810	0	0	0	317039	338799	0	0	0	791526	0	1.38032e+06	1.84319e+06	0	0	19291	217576	254893	401842	0
Eicosanoic acid (TMS)	0	0	0	0	0	0	0	0	0	0	0	0	0	0	0	0	0	0	0	0	0	0	0	0	0	0	0	0	0	0	0	0	0	0	0	0	0	0	0	0	0	0	0	0	0	0	0	0	0
(Oleanitrile)	0	0	0	0	0	0	0	0	0	0	0	0	0	0	0	0	0	0	0	0	0	0	0	0	0	0	0	0	0	0	0	0	0	0	0	0	0	0	0	0	0	0	0	0	0	0	0	0	0
RI=2522.0, 16.0547 min 081816029	0	0	0	0	0	0	0	0	0	0	0	0	0	0	0	0	0	0	0	0	0	0	0	0	0	0	0	0	0	0	0	0	0	0	0	0	0	0	0	0	0	0	0	0	0	0	0	0	0
RI=2536.5, 16.1169 min 082316015	0	0	0	0	0	0	0	0	0	0	0	0	0	0	0	0	0	0	0	0	0	0	0	0	0	0	0	0	0	0	0	0	0	0	0	0	0	0	0	0	0	0	0	0	0	0	0	0	0
RI=2548.8, 16.1699 min 081816029	0	0	0	103119	44660.2	45593.5	0	0	0	0	0	0	0	0	0	0	0	0	0	0	0	0	0	0	0	0	0	0	0	0	0	0	0	0	0	0	0	0	0	0	0	0	0	0	0	0	0	0	0
Salicin	0	0	0	26303.7	0	0	0	0	0	0	0	0	0	0	0	0	0	0	0	0	0	0	0	0	0	0	0	0	0	0	0	0	0	0	0	0	0	0	0	0	0	0	0	0	0	0	0	0	0
RI=2585.7, 16.3283 min 081816032	0	0	0	68086.4	31432.4	37353.8	0	0	0	0	0	0	0	0	0	0	0	0	0	0	0	0	0	0	0	0	0	0	0	0	0	0	0	0	0	0	0	0	0	0	0	0	0	0	0	0	0	0	0
RI=2597.7, 16.3802 min 082616028	0	0	0	137417	56923.3	61787.4	0	0	0	30789	34337.4	42806.8	0	0	0	0	0	0	0	0	0	0	0	0	0	0	0	0	0	0	0	0	0	0	0	0	0	0	0	0	0	0	8477.35	0	0	0	0	0	0
Arbutin (5TMS)	0	0	0	0	0	0	0	0	0	0	0	0	0	0	0	0	0	0	0	0	0	0	0	0	0	0	0	0	0	0	0	0	0	0	0	0	0	0	0	0	0	0	0	0	0	0	0	0	0
RI=2633.6, 16.5264 min 082316005	0	0	0	0	0	0	0	0	0	0	0	0	0	0	0	0	0	0	0	0	0	0	0	0	0	0	0	0	0	0	0	0	0	0	0	0	0	0	0	0	0	0	0	0	0	0	0	0	0
(EIQTMS_N12C_ATHL_1852.4_3161BN34_Dehyd	0	0	0	41642.3	0	0	0	0	0	0	0	0	0	0	0	0	0	0	0	0	0	0	0	0	0	0	0	0	0	0	0	0	0	0	0	0	0	0	0	0	0	0	0	0	0	0	0	0	0
RI=2653.3, 16.6066 min 082316015	0	0	0	0	0	0	0	0	0	0	0	0	0	0	0	0	0	0	0	0	0	0	0	0	0	0	0	0	0	0	0	0	0	0	0	0	0	0	0	0	0	0	0	0	0	0	0	0	0
(EIQTMS_N12C_SD1_2650.9_3223BF23_Adenos	17349.9	0	0	0	6.05213e+06	0	0	32144.5	0	2471.05	0	478722	0	0	0	14933.4	24527.2	0	0	0	0	0	0	0	0	0	9735.28	15691	0	19616.8	29965.2	0	0	0	0	0	0	457.47	0	0	31627.4	0	0	0	0	0	3779.18	838.51	0
RI=2679.8, 16.7139 min 082316015	0	0	0	135881	62897.4	0	0	0	0	0	0	0	0	0	0	0	0	0	0	0	0	0	0	0	0	0	0	0	0	0	0	0	0	0	0	0	0	0	0	0	0	0	0	0	0	0	0	0	0
Sucrose (tms derivative)	0	0	0	0	0	0	0	23459.1	0	0	0	0	0	0	0	0	0	0	0	0	12550.4	0	0	0	0	0	0	0	0	0	20784	0	0	0	0	0	0	12987.6	0	0	0	0	0	0	0	0	0	0	0
RI=2724.7, 16.8963 min 081816023	0	0	0	1.37364e+06	745384	296960	0	0	0	34693.7	27807.5	72750.1	0	0	0	0	0	0	0	0	9755.97	0	0	0	0	0	0	0	0	0	0	0	0	0	0	0	0	0	0	0	21038.7	0	0	0	0	17270.5	0	18882.6	0
(deoxyribose 3TMS?)	0	0	0	0	0	0	0	0	0	0	27856.7	0	0	0	0	0	0	0	0	0	0	0	0	0	0	0	0	0	0	0	0	0	0	0	0	0	0	0	0	0	0	0	0	0	0	0	0	0	0
Phloretin	0	20863.5	0	639336	276641	272145	17246.2	21835.2	0	75881	176242	125783	0	0	13782.4	0	0	0	0	0	0	12577.4	0	0	11293.5	12042.2	0	0	0	27956.5	0	0	0	19347.4	0	0	0	24607.5	20796.8	0	0	20120.8	0	0	0	12372.1	0	0	0
(1-Monooleoylglycerol trimethylsilyl et	0	0	0	250539	113552	108532	0	0	0	39901.4	49357.3	0	0	0	0	0	0	0	0	0	0	0	0	0	0	0	0	0	0	0	0	0	0	0	0	0	0	0	0	0	0	0	0	0	0	0	0	0	0
(EIQTMS_N12C_OARPLAS_2783.6_3350DF06_[9	26066.7	21918.9	21735.1	158762	65213.6	80635.9	18553.5	21953.9	0	29244.1	39734.7	52410.4	15898.7	25002.5	0	0	0	0	23997.1	23893.7	0	25095.1	0	0	0	0	0	23388.2	20443.4	32673.4	17123	0	0	25084.9	23190.8	0	0	25045.2	29706.4	0	41175	24464	0	16212.1	0	22846	20470.4	26244.5	0
D-Turanose peak1 (heptakis tms)	20544.4	25375.2	27502.8	635184	279418	272774	16780.3	27884.3	9702.19	75878.9	176940	133265	0	0	0	0	0	0	0	23985.9	0	24937.8	0	0	0	18979.1	18891.3	23943.1	0	26958.5	0	0	0	21400	0	0	0	35560.3	19542	0	29357	27808	20997.8	12364.5	16415.4	0	0	0	14836.7
RI=2816.8, 17.2657 min 082616028	4.25901e+06	3.84321e+06	5.91952e+06	1.65249e+07	9.35324e+06	1.03952e+07	2.8866e+06	3.57513e+06	3.44832e+06	7.69616e+06	7.86877e+06	6.77584e+06	3.34623e+06	101127	1.95874e+06	1.74789e+06	2.25674e+06	2.91146e+06	4.09391e+06	4.61596e+06	2.64299e+06	3.97486e+06	414165	291458	2.60571e+06	3.95489e+06	2.75226e+06	2.7271e+06	2.69138e+06	3.49253e+06	2.57705e+06	2.66732e+06	2.66732e+06	2.00366e+06	2.45954e+06	260580	3.52471e+06	2.99554e+06	2.16462e+06	249708	4124115	2.20614e+06	2.59881e+06	3.03165e+06	2.22858e+06	3.48597e+06	2.07023e+06	5.44529e+06	2.77498e+06
RI=2850.8, 17.3950 min 081816029	0	0	0	0	0	0	0	0	0	0	0	0	0	0	0	0	0	0	0	0	0	0	0	0	0	0	0	0	0	0	0	0	0	0	0	0	0	0	0	0	0	0	0	0	0	0	0	0	0
RI=2873.4, 17.4811 min 081816029	0	0	0	254235	512605	161215	0	0	0	187018	455288	195993	0	0	0	0	0	0	0	0	0	0	0	0	0	0	0	0	0	0	0	0	0	0	0	0	0	0	0	0	54249.5	0	0	0	0	0	0	0	0
RI=2944.9, 17.7528 min 081816029	0	0	0	343443	353354	401406	0	0	0	0	9950.05	458864	0	0	0	0	0	19830.5	0	0	0	0	0	0	0	0	0	0	0	0	37879.1	0	0	0	0	0	0	0	0	0	0	0	0	0	0	0	0	0	0
RI=2968.9, 17.8440 min 081816029	32229.9	0	0	467990	345395	402945	0	44107.1	0	0	38597.3	495443	28408.7	0	0	15324.7	0	74673.2	22454.9	32698.5	0	0	0	0	0	0	0	0	12325.5	0	105672	0	0	0	0	17206.9	0	0	0	0	0	0	0	0	0	13075.9	0	0	0
GSIL135	0	0	0	345102	340237	744236	0	0	0	0	28440.4	255800	0	0	0	0	0	19191.3	0	0	0	0	0	0	0	0	0	0	0	0	37297.4	0	0	0	0	0	0	0	0	0	0	0	0	0	0	0	0	0	0
RI=3011.1, 18.0102 min 082316015	0	0	0	13398.8	0	0	0	0	0	0	0	0	0	0	0	0	0	0	0	0	0	16181.7	0	0	0	0	21151	0	0	0	3984.52	0	0	10586.7	42693.6	3777.31	8076.7	0	0	0	3446.89	0	0	0	0	0	0	3761.33	0
GSIL136	0	0	0	0	0	0	0	0	0	0	0	0	0	0	0	0	0	0	0	0	0	0	0	0	0	0	0	0	0	0	0	0	0	0	0	0	0	0	0	0	0	0	0	0	0	0	0	0	0
GSIL137	0	14376	0	129812	69067.6	72338.8	0	0	11557.7	0	19014.6	40158.9	0	0	0	0	0	0	0	0	0	0	0	0	0	0	0	17708	0	0	0	0	0	0	6744.33	0	0	0	0	0	0	0	0	0	0	0	0	0	0
5'-Adenylic acid, pentakis(trimethylsil	0	0	0	0	0	0	0	0	0	0	0	0	0	0	0	0	0	0	0	0	0	0	0	0	0	0	0	0	0	0	0	0	0	0	0	0	0	0	0	0	0	0	0	0	0	0	0	0	0
Chlorogenic acid (tms derivative)	0	0	0	0	0	0	0	0	0	0	0	0	0	0	0	0	0	0	0	0	0	0	0	0	0	0	0	0	0	0	0	0	0	0	0	0	0	0	0	0	0	0	0	0	0	0	0	0	0
Quercetin (TMS)	0	0	0	33803.3	0	18698.9	0	0	0	0	0	0	27884.1	0	0	0	0	0	0	0	23550.6	0	0	0	0	0	0	0	0	0	0	0	0	0	0	0	2269.11	0	0	0	0	8201.91	0	0	0	0	0	0	0
Raffinose (TMS)	0	0	0	0	0	0	0	0	0	0	0	0	0	0	0	0	0	0	0	0	0	0	0	0	0	0	0	0	0	0	0	0	0	0	0	0	0	0	0	0	0	0	0	0	0	0	0	0	0
RI=3509.5, 20.2103 min 082616028	0	0	0	1.34355e+06	683070	410193	0	0	0	0	0	242451	0	0	0	0	0	0	0	0	0	0	0	0	0	0	0	0	0	0	0	0	0	0	0	0	0	0	0	0	0	0	0	0	0	0	0	0	0
Phloridzin (TMS)	0	0	0	0	0	0	0	0	0	0	0	0	0	0	0	0	0	0	0	0	0	0	0	0	0	0	0	0	0	0	0	0	0	0	0	0	0	0	0	0	0	0	0	0	0	0	0	0	0
RI=3520.8, 20.3033 min 081816029	0	0	0	561960	0	165358	0	0	0	33565.1	44465.6	40558.3	0	0	0	0	12337.9	0	0	0	0	21496.8	0	0	0	0	0	0	0	0	0	0	0	0	0	0	0	0	0	0	0	0	0	0	0	0	0	0	0
RI=3532.5, 20.3991 min 081816029	0	0	0	345862	179605	121086	0	0	0	36016.2	46701	40572.4	0	0	0	0	0	0	0	0	0	24246.2	0	0	0	0	0	0	0	0	0	0	0	0	0	0	0	0	0	0	0	0	0	0	0	0	0	0	0
RI=3564.5, 20.6623 min 081816029	0	0	0	354295	152967	215895	0	0	0	0	0	73099.4	0	0	0	0	0	0	0	0	0	0	0	0	0	0	0	0	0	0	0	0	0	0	0	0	0	0	0	0	0	0	0	0	0	0	0	0	0
RI=3586.0, 20.8389 min 081816029	0	0	0	320755	165261	131994	0	16500.9	0	0	0	28428.7	10968.7	0	0	0	12435.9	0	0	0	2848.09	5841.89	0	0	0	0	15817.2	8039.77	299.95	214.83	4946.39	0	0	0	0	0	0	6046.54	0	0	792.21	0	10975.6	0	4622.43	0	0	0	12843.6
RI=3592.3, 20.8907 min 081816029	77647.6	103718	107127	314901	160802	132511	65873.9	57929.3	68141.4	81908.6	73829.5	86953.1	45761.5	0	32433.7	27180.4	32587.8	34132.7	59665.1	99834.1	52829.1	55278.4	0	0	37399.8	65828.3	43277.2	34676.6	41285	41460.1	39893.4	39666.9	39666.9	36608.9	38538.3	0	56019.9	43182.5	37760.8	0	50740.2	39657.6	64256.9	57876.7	51172.8	34904.3	28946	39375.4	71765.3
RI=3604.6, 20.9916 min 081816029	93524.6	108535	127679	250862	150989	147329	77531.9	68511.4	76417.1	110791	79949.2	98940.1	52718.9	0	40707.5	33272.1	39339.1	36288.1	73048	113893	58341	61438.6	0	0	48918.5	81247.4	45770.8	36598	45752.8	45683.6	48938.4	46059.7	46059.7	42754.9	43816.1	0	69150.4	49210.9	39974.6	0	59258.9	37643.9	70923.3	64196.2	60789.8	36965.1	33222.8	41167.1	81381.1
RI=3645.0, 21.3234 min 081816029	0	0	0	116714	53469.1	37186.4	0	0	0	56948.4	74246.4	16835.1	0	0	0	0	0	0	0	0	0	0	0	0	0	0	0	0	0	0	0	0	0	0	0	0	0	0	0	0	0	0	0	0	0	0	0	0	0
[truncated: 5 more columns]

## Sheet: Volatile-metabolites-GR
[Header Info Signal 1 COLT 3.0]
020218ASDGR1.D
2018-02-02 15:33:00
ASDGR1
	0ASDGR1	0ASDGR2	0ASDGR3	1ASDGR1	1ASDGR2	1ASDGR3	3ASDGR1	3ASDGR2	3ASDGR3	7ASDGR1	7ASDGR2	7ASDGR3	15ASDGR1	15ASDGR2	15ASDGR3	21ASDGR1	21ASDGR2	21ASDGR3
[Results Signal 1]
Pentane	277542	264725	107580	1593580	1181750	252185	2470850	2740880	5150010	9449570	11422700	4312320	0	4743520	4686900	99425.1	73296.7	10642200
carbon dioxide [Emmi 031418 ASDGR-P2]	13326000	10786200	17617500	37813600	26273500	12030300	23308900	11407300	5482980	15379700	34776800	14491300	20476200	11537800	16211100	18444400	36958900	50200100
Ethane, 2-chloro-1,1,1,2-tetrafluoro-	0	0	0	0	0	0	0	0	0	0	0	0	0	0	0	0	0	0
hexane [Emmi 022318 ASDGR-P1]	311376	254527	475466	2752180	896894	0	1625750	1747490	2077060	2114410	2561950	4893870	0	1248600	3653820	6858680	7896730	5484710
Formaldehyde (less than 80 10151504)	0	0	0	0	0	128714	0	0	0	0	0	0	0	0	0	0	0	0
Ethyl Chloride	0	0	0	0	0	0	0	0	0	0	0	0	0	0	0	0	0	0
Cyclopropane, propyl-	0	0	80221.7	0	0	0	0	0	0	0	0	0	0	0	0	0	1027490	0
Methanethiol (less than 80 11021517)	0	0	0	0	0	0	0	0	0	0	0	0	0	123173	1352930	1837250	572597	1022220
n-Hexane	311376	254527	475466	2752180	896894	0	1625750	1747490	2077060	2114410	2561950	4893870	0	1248600	3653820	6858680	7896730	5484710
1-Butene, 2,3-dimethyl-	0	0	0	226274	0	176272	0	0	75654.5	437974	0	0	0	355560	1133100	204340	931117	869367
1,3-Butadiene, 2-methyl-	142323	0	33946.1	6380690	2677540	3749700	6027530	4365050	4129640	7971760	11705900	9962400	0	1278630	7309840	6362200	12199700	10206100
Propane, 2-methoxy-2-methyl-	0	0	0	0	0	0	0	0	17907.1	0	0	0	0	89279.2	0	0	0	0
Acetaldehyde	286571	83736.1	750010	0	0	1321590	0	408874	0	0	0	0	0	0	0	0	0	0
Heptane	0	0	0	-1	116179	67228.6	663576	427549	1264810	935955	769902	1253670	0	717913	634331	0	2149030	2896810
Propane, 2-ethoxy-2-methyl-	0	0	0	0	0	0	0	0	0	0	0	0	0	0	0	0	0	0
Carbon disulfide	0	0	155308	360687	199159	0	10537.4	0	0	0	0	0	0	1422030	0	0	0	232353
Dimethyl sulfide	0	0	255704	34841700	37213300	46631400	86865.4	9932850	13803200	933456	45152400	71523100	0	9013410	171934000	191863000	255835000	184529000
Butane, 1-methoxy-	0	0	0	0	0	0	0	0	0	0	0	0	0	0	77491900	0	0	0
Dimethyl sulfide	804054	1050500	288586	42424600	0	58191100	9988550	12092100	14836800	43085100	0	0	96784.8	148172000	157010000	259379000	329084000	241792000
(3-ethyl pentane)	0	0	0	0	0	0	0	0	0	0	0	0	0	0	0	0	0	0
borane-methyl sulfide complex [Emmi 022	0	0	255704	34841700	37213300	46631400	86865.4	9932850	13803200	933456	45152400	71523100	0	9013410	171934000	191863000	255835000	184529000
Propanal	70886	0	108810	0	0	0	0	0	28299.6	0	-1	0	0	0	0	0	0	0
Furan	31371.1	0	39360.8	0	0	0	0	0	0	0	0	0	0	0	0	143281	311671	0
Hexane, 2,4-dimethyl-	37938.8	0	14741.3	313269	194685	125347	0	0	904061	0	0	934093	0	0	0	0	3890430	622596
Octane	0	0	0	0	335807	0	321141	0	3053770	0	0	28201600	0	0	8070440	0	10846000	612672
2,4 Hexadiene [! Emmi 031418 ASDGR2]	0	0	0	599742	108816	334150	731704	3183340	1539540	3983730	8561240	741475	0	1460720	494223	123417	0	1337200
2-Methylpropanal	203233	327370	360568	0	0	0	0	0	0	0	0	0	0	604047	0	0	0	0
Acetone	335737	866382	586140	20286000	1739430	2249420	626170	1964670	1815870	7094300	4739060	10078400	496773	1778600	2769240	5342450	3197820	4120760
butane, 1-methoxy-3-methyl [Emmi 031418	0	0	0	0	0	0	1840870	5364790	8284480	4509650	4624630	7869440	0	2137120	6306310	3584840	7819710	5789210
Ethyl formate	0	0	0	0	0	0	0	0	0	0	0	0	0	0	0	0	0	0
Methyl acetate	0	0	0	0	0	0	0	0	0	0	360331	1442930	0	1445840	3754290	0	0	0
1-Heptene, 3-methyl-	343182	291658	181665	96334.6	194618	232239	316557	350778	208444	57997	80418.4	0	445979	188456	145582	243940	216031	0
2-Octene, (E)-	0	0	0	0	0	0	0	297347	0	0	183688	271145	0	0	416890	0	609926	0
Tetrahydrofuran (check)	0	0	0	0	0	0	0	0	0	0	0	0	0	0	0	0	0	0
Ketene	0	0	0	0	0	0	0	0	0	0	0	0	0	0	0	0	0	0
Furan, tetrahydro-2,2,5,5-tetramethyl-	0	0	0	0	0	0	0	0	0	0	0	0	0	0	0	0	0	0
2 methyl furan [Emmi 031418 ASDGR2]	81083.4	80162.9	36421.2	526082	217199	346415	105132	203082	121788	1038710	1177270	1508560	0	684310	1393420	1169610	2766550	1382540
Butanal	0	57396.2	37578.2	0	0	89205.5	58556.9	0	67130.7	0	209032	0	0	0	35791.4	134945	59546.3	77978.9
Ethyl acetate	97619	114419	266873	484206	299217	273995	169051	188126	0	158971	60259.8	0	0	33867.1	167689	566709	907294	2588380
Furan, 3-methyl-	630607	54225.4	69113.5	3840160	1551030	2856470	999342	1749460	844806	3995040	4521900	5468360	0	2177610	3992810	4053590	8193430	4057990
Nonane (10151504)	171639	0	0	326637	335881	0	-1	0	531922	0	0	0	113852	0	0	0	1636370	2366990
Isopropyl acetate	0	0	36963.9	0	0	0	0	0	0	0	0	0	0	0	0	0	0	0
Methanol	0	0	0	0	0	0	0	0	0	0	0	0	0	0	0	0	0	0
2-Butanone	446195	125876	440468	6307800	1698560	2573540	0	1620110	241774	24847700	10374700	56181700	0	12771100	7075880	7029920	6672300	7765910
Sulfur dioxide (less than 80 11021517)	0	0	0	0	0	0	0	0	0	0	0	0	0	0	0	0	0	135332
2-Propanol, 2-methyl-	126637	65367.1	1758930	157703	889688	102043	222886	473238	267394	230759	301686	0	0	0	0	0	0	0
Methyl propanoate	0	0	0	0	0	0	0	0	0	0	0	0	0	485393	640632	0	0	0
2-Methylbutanal	0	71747.3	189630	0	0	0	0	0	0	0	0	0	0	-1	0	202948	149680	0
propane [Emmi 030918 ASDWH1]	0	62743.6	0	0	0	0	0	0	0	0	0	0	0	0	0	0	0	83532.3
Butanal, 3-methyl-	255637	102347	276871	0	52211.4	103312	0	0	42342.7	60172.5	747034	0	0	263238	0	189829	0	0
Isopropanol	105483	587730	184609	3684440	1358530	1685370	274477	96471.3	1005190	2047510	6709710	24338800	620274	5927270	11113700	29485400	41448900	30786300
Ethanol	2326790	1126930	10981700	7732730	19284000	12910900	0	0	0	0	0	0	0	0	0	4539410	9723790	2881870
Benzene	1519900	1316190	2130070	3459390	2413210	2835400	3064460	4141760	3526370	6880370	7179980	7231460	1769400	3507290	4477670	5779110	8484610	5247010
2-ethyl furan [Emmi 031418 ASDGR2]	321439	457904	125463	1627740	606982	1088040	616311	1001110	44672.7	3895570	3777720	4355170	60068.8	1753210	2825310	2505790	4310470	2917620
1-methoxy-3-methyl-2-butene [Emmi 03121	0	0	0	0	0	0	0	0	0	0	0	0	0	0	0	0	0	0
(2-amino-3-butenoic acid)	0	0	0	0	0	0	0	0	0	0	0	0	0	0	0	0	0	0
octane, 2,2,6-trimethyl [Emmi 041418 AS	0	0	0	0	0	0	0	0	0	53593.3	101444	384511	0	0	0	0	0	0
Propanoic acid, 1-methylethyl ester (RT	0	0	0	0	0	0	0	0	0	0	0	0	0	0	0	0	0	0
Ethyl propanoate	0	0	0	0	0	0	0	0	0	0	0	0	0	0	0	0	0	0
furan, 2,4-dimethyl [Emmi 031018 ASDWH-	0	0	0	0	0	0	0	0	0	0	0	0	0	0	0	0	0	0
1,1,3,3,5,5-hexamethyl-2-thia-1,3,5-tri	185612	257633	152340	2785370	857699	2239220	2401190	4164490	4622300	124570	97324.2	138248	1897360	8362740	5454920	11785700	10647300	12476700
Ethyl 2-methylpropanoate	0	0	0	0	0	0	0	0	0	0	0	0	0	0	0	0	288029	328945
1,6-dimethylhelpta-1,3,5-triene [Emmi 0	401367	128169	64789	1629880	816799	867159	469672	359368	651945	647073	996731	3337190	0	731848	2111770	332564	3178220	2764180
Benzene, (trifluoromethyl)- (11101508)	0	0	0	0	0	0	0	27459.9	0	0	0	0	443827	0	0	0	0	0
Propyl acetate	0	0	0	0	0	0	0	0	0	0	0	0	0	0	0	0	0	0
2-Pentanone	0	0	0	0	0	0	0	0	0	1023650	879053	4338030	0	1247170	1235540	1505620	559778	523979
Pentanal	0	654424	514223	0	0	0	167446	0	0	0	0	0	94511.9	0	0	0	0	0
octane, 2,3,3-trimethyl [Emmi 041418 AS	0	0	0	0	0	0	0	0	0	0	0	0	0	0	0	0	0	0
3-Buten-2-one, 3-methyl- (10151504)	0	0	0	0	0	0	0	0	0	0	0	0	0	0	0	0	0	0
Methyl butanoate	0	0	0	0	0	0	0	0	0	54993.3	122171	1983540	0	271515	448537	0	255712	392813
heptane, 2,2,4,6,6-pentamethyl [Emmi 03	0	0	0	0	0	0	0	0	0	240503	121689	0	0	0	-1	0	-1	0
2,3-Butanedione	61433.4	-1	331209	0	0	0	0	0	49170	127265	200390	0	0	229778	198020	104837	0	0
3-Pentanone, 2-methyl-	0	112739	0	0	186327	528649	26347.4	0	0	951611	835108	858515	-1	999092	349244	0	248706	0
(Acetonitrile)	692676	926436	394628	0	389970	254533	505987	401856	990464	276975	365773	0	182156	0	0	0	256966	0
(GSV3)	0	0	0	0	0	0	0	0	0	0	0	0	0	0	0	0	0	0
Methyl Isobutyl Ketone (11021517)	0	28645.7	0	79555.8	21483.8	30292.1	0	12138	24976.6	36130.1	76245.1	559720	0	133049	102201	140199	195540	207643
2-Ethylbutanal	0	0	0	0	0	0	0	0	0	0	0	0	0	0	0	0	0	0
heptane, 2,2,4,6,6-pentamethyl [Emmi 04	0	0	0	0	0	0	0	0	0	240503	121689	0	0	0	-1	0	-1	0
3-hexene, 1-methoxy-, (Z) [Emmi 031218	0	0	0	0	0	0	0	0	0	0	0	0	0	0	0	0	0	0
2-Pentanone, 3-methyl- (11101516)	0	0	0	35109.7	0	0	0	24123.4	0	0	0	109297	0	0	134104	92023.7	100168	133161
Trichloromethane (10151504)	631225	566940	1128910	1677080	1131840	1055840	498115	633790	243520	5801910	10084600	8223660	391521	190774	198439	8622750	3365100	1917240
Methyl 2-methylbutanoate	0	0	0	0	0	0	0	0	0	261744	339886	1268150	0	212341	119315	0	74386.8	93774.9
octane, 6-ethyl-2-methyl [Emmi 041418 A	0	0	0	0	0	0	0	0	0	310924	187785	0	0	0	0	0	0	0
Amylene hydrate	0	0	0	0	0	0	53042.2	0	53466	0	0	0	0	0	0	0	0	0
Butanoic acid, 3-methyl-, methyl ester	0	0	0	0	0	0	0	0	0	129201	0	751251	0	290415	213316	0	0	162581
2-Methylpropyl acetate	0	0	0	0	0	0	0	0	0	0	0	0	0	18132.3	0	0	836403	682408
(1-Penten-3-one)	170167	102830	309939	0	0	0	0	0	0	0	327783	0	0	0	170920	153038	251963	0
a-Pinene	188438	106551	951189	214182	306939	143345	103703	114950	51583.3	80269.3	67169.2	101175	23021	47094.3	37811.5	0	0	40191.9
(NVC022)	796055	761877	791453	1082420	482688	679089	521709	1011690	460628	0	0	0	421554	0	321111	586890	336754	443795
2-butanol (+/-) [Emmi 022318 ASDGR3]	0	0	0	167507	160782	183515	25865.3	123761	114925	4421130	4099850	21340500	0	13745200	9518260	8445220	10793000	14358800
2-Butanol	0	0	0	167507	160782	183515	25865.3	123761	114925	4421130	4099850	21340500	0	13745200	9518260	8445220	10793000	14358800
Z-1-methoxy-2-hexene [Emmi 031218 ASDHW	0	0	0	0	0	0	0	0	0	0	0	0	0	0	0	48883.2	0	0
4,4-dimethyl-2-cyclopenten-1-one [Emmi	0	21482.2	0	59953.3	0	35310.7	61122.4	39505.5	0	222803	337978	511394	0	251806	630271	310468	808664	378045
Nonane, 2,6-dimethyl-	0	0	0	0	0	0	27960.8	0	28773.1	0	270465	1178330	-1	0	-1	0	0	0
heptane, 5-ethyl-2,2,3-trimethyl [Emmi	0	0	0	0	0	0	0	0	0	506468	262102	242473	0	0	0	0	0	0
Ispropyl butyrate (ISTD)	0	0	0	0	0	0	45910.1	0	67518.1	0	0	0	0	-1	-1	0	-1	0
Ethyl butanoate	0	0	0	0	0	0	0	153162	0	0	0	0	0	0	0	43542.2	670609	1363810
2-butanol (R) [Emmi 031418 ASDGR3]	0	0	0	0	0	0	0	0	62479.7	5292400	3384420	7571490	0	1896380	2525260	4783130	1213070	8596760
Toluene	520994	657658	800794	3252550	992752	1209180	657158	1101310	666732	743487	538216	1268060	412894	892033	757814	1853650	1615580	1128910
1-Propanol	0	0	0	3106710	7074850	4899040	0	0	0	0	0	0	0	0	3296240	4060730	8909590	10330000
Methyl thiolacetate (! 11101510)	0	0	0	0	80255.3	0	0	0	0	0	0	5011370	0	699144	761982	1256460	407412	476335
Propyl propanoate	0	0	0	0	0	0	0	0	0	0	0	0	0	0	0	0	0	0
Disulfide, dimethyl (! 11101510)	0	0	0	0	0	0	3073820	5887540	300997	35716500	51974800	65121600	0	23822900	24504300	43032100	15715200	18172500
Ethyl 2-methylbutanoate	302907	70171.9	3097620	111056	304382	103527	46972.8	179582	42972.7	36645.8	47591	225033	0	0	46087.6	30883.4	92748.1	180810
(3-Methyl-7-oxo-1,7-dihydro-triazolo(4,	0	0	0	0	0	0	0	0	0	0	0	0	0	0	0	0	0	0
decane, 2,3,6, trimethyl [Emmi 031418 A	0	0	0	0	0	0	0	0	0	512309	555849	657277	0	0	0	0	0	0
Butanoic acid, 3-methyl-, ethyl ester (	0	0	0	0	0	0	0	0	0	0	0	0	0	0	0	0	112221	146622
1,4-Dioxane	128681	90501.6	977245	152636	68829.6	118049	-1	94792.3	0	0	0	0	60006.2	0	0	0	0	0
camphene [Emmi 020218 ASDGR3]	9176.82	37910.9	28736.4	38272.1	44513.3	26727.1	15582	0	0	0	0	0	0	0	0	0	31330.3	0
Disulfide, dimethyl (! 11101510)	0	0	0	0	0	0	3073820	5887540	300997	35716500	51974800	65121600	0	23822900	24504300	43032100	15715200	18172500
SOILA1	156289	154958	113116	1970990	558817	1369510	2229550	1918550	2575080	94363.9	84826.6	109447	1809130	3006470	2554130	2923690	3387180	3695600
3-Hexanone, 4-methyl- (11101510)	0	0	0	0	0	0	0	0	0	0	0	0	0	13810.3	0	97303.7	142607	117227
SOILA2	49780	67888.7	55950.7	793578	241760	626104	602641	693923	894599	0	0	0	311444	1084880	775270	1196280	866501	1476710
Butyl acetate	0	0	0	0	0	0	0	0	0	0	0	0	0	0	0	0	0	0
nepthalene, 1-isocyano [Emmi 031418 ASD	0	0	0	0	0	0	0	0	0	58917.6	48930	61199	0	0	0	0	0	0
decane, 3,7-dimethyl [Emmi 042018 ASDRB	0	0	0	0	0	0	0	0	0	96346	218745	222554	0	0	0	0	0	0
2-Hexanone	0	0	0	0	0	0	0	0	0	0	0	0	0	0	0	0	0	0
Hexanal	514989	546225	437773	220228	238855	230022	453734	345600	399323	109752	256801	0	106443	235057	220639	654024	427400	251247
Undecane (10151504)	19968.9	-1	53733.1	-1	22007.8	-1	-1	-1	0	0	0	31545.3	-1	0	-1	0	45662.2	0
2-Butenoic acid, methyl ester, (E)- (11	0	0	0	0	0	0	0	0	0	114975	0	967209	0	0	0	0	0	0
2-Methyl-1-propanol	90500.3	-1	-1	2967250	4657970	5201610	0	151110	101494	3967420	6329980	15351500	0	7292300	7124220	11293000	23112300	23655800
B-pinene [Emmi 020318 NAC-P2]	156740	-1	989920	144388	218914	105810	40957.1	112575	42581.3	0	0	60950.4	27016.1	0	0	42700.6	47168	23995.4
(GSVA1) (3-Ethyl-2-methyl-1-pentene)	0	27395.8	-1	0	0	0	0	0	0	0	0	0	0	0	0	0	0	0
(3-Pentanol)	63178.1	0	0	863360	316371	350258	36274.9	515467	518399	3240560	2953700	11058500	0	4106450	5629600	4807400	9318760	6912450
Butanoic acid, 1-methylpropyl ester (11	0	0	0	0	0	0	-1	0	0	0	0	290695	0	243865	0	0	140334	312220
2-Methylbutyl acetate (HCV2)	0	46024.1	59090.7	0	102813	0	0	36335	122659	101764	0	0	0	27686.2	0	103671	0	0
Ethylbenzene	139907	216234	191580	635212	249806	293839	173094	241994	173644	136129	131506	205204	117450	191940	210438	0	262677	0
Propyl butanoate	0	0	0	0	0	0	0	0	0	0	0	0	0	0	0	0	0	0
(R)-(-)-2-Pentanol	0	0	0	158787	149856	157899	0	291634	0	5763740	4934790	20386400	0	10189100	14317000	22247300	21781300	27860200
2-butanol, 3-methyl-, (S)- [Emmi 031418	0	0	0	0	0	-1	0	39268.7	37786.3	18068.4	186966	0	0	0	0	0	0	0
p-xylene [Emmi 020318 ASDGR1]	205290	280523	362075	773141	323082	449242	242545	334169	257290	200193	202310	123861	150798	207179	313505	161006	325824	69169
GSV40	0	0	0	0	0	0	0	0	0	0	0	0	0	0	0	0	0	0
(3-Hexen-2-one)(NVC004)	15263.4	38787.8	34179.6	43869.8	0	0	21974.4	54749.5	67927.9	89912.3	53787.6	99145.2	0	0	53578.6	34616.6	30215.8	-1
(E)-2-Pentenal	0	0	0	0	0	0	0	0	0	0	0	0	0	0	0	0	0	0
Ethyl pentanoate	0	0	0	0	0	0	0	0	0	0	0	0	0	0	0	0	0	22108.8
(Z)-3-Hexenal	20095.1	-1	64433.9	0	55275.4	72547.6	0	38551	31531.9	-1	0	60864.7	0	94610.9	0	0	0	0
Propyl 2-methylbutanoate	0	0	0	0	0	0	0	0	0	0	0	0	0	0	0	0	0	0
Butyl propanoate	0	0	0	-1	0	0	0	0	0	0	0	0	0	0	-1	42603.1	0	43730.4
3-Pentanol, 2-methyl- (11101510)	0	0	0	0	0	0	0	0	79508.9	178917	184270	109428	0	192833	70852.5	184249	341401	0
Methane, nitro-	0	0	0	433648	0	0	0	0	0	0	53677.8	952368	0	0	0	0	0	0
1-Butanol	66112.3	103590	112848	250431	444262	556653	0	503634	204859	587309	3047100	3147740	0	2143570	4632200	8786320	11401500	24444300
(2-Methylpropyl butanoate)(NVC015)	0	0	0	0	0	0	0	0	0	43785.8	148170	387062	0	210594	149671	36850.8	184254	183545
3-Heptanone	7501.18	41581.7	-1	29657	15020.9	17369.5	0	-1	-1	-1	0	28219	0	-1	-1	-1	0	0
Acetic acid, 1-methylcyclopentyl ester	157757	148021	125210	0	0	0	92531.4	70803	118338	27291.6	0	0	0	0	0	127882	102840	63932.4
(1-Penten-3-ol)(NVC016)	2557670	1800070	2700270	4948050	1726940	1866650	153767	351489	524982	1329700	1509860	1867930	17719	707183	339827	477957	374555	0
(2-butenenitrile)	0	0	0	0	0	0	0	68700.1	0	0	0	0	0	0	0	0	0	0
a-Myrcene	100862	-1	789489	47218.1	102851	43791.2	-1	32077.3	0	0	0	0	0	0	0	0	0	0
2-Butenoic acid, 1-methylethyl ester (!	0	0	0	0	0	0	0	0	0	45375.1	32256	278153	0	52090.1	0	0	0	0
(2-Propen-1-amine)(NVC017)	0	0	87334.8	0	0	0	0	0	0	814775	1642910	2667240	0	1412960	0	1988980	155477	3649360
Ethyl (E)-2-butenoate	0	0	0	0	0	73744.3	0	43361.9	0	0	0	289922	0	0	0	0	0	0
thiophene, 3-ethyl [Emmi 031218 ASDWH1]	0	0	0	24448.3	0	-1	81743.4	20900.7	21860.2	76524	93387.9	187195	0	80157.1	116029	82694.6	195219	173299
(isopropylisothiocyanite)	0	0	0	0	0	0	0	0	0	0	0	0	0	0	0	0	0	0
Pentyl acetate	0	0	0	-1	0	0	0	0	0	0	0	0	0	0	0	0	0	0
Heptanal (11101508)	401658	527040	301013	282767	159827	325523	466804	506816	394555	219361	263456	197658	154312	379220	225200	519469	306939	254273
Pyridine (11101508)	0	73600.8	0	0	0	30959	0	0	0	0	0	40884.5	0	0	-1	0	62712	57217.4
a-Terpinene	0	106622	109341	141710	-1	0	97644	0	0	0	0	403260	0	113699	384578	130420	618722	349278
(2,4-pentadienenitrile)	992993	571993	643212	657864	302108	497678	673045	457363	431738	377770	601705	496322	395966	400757	440052	473664	441982	0
o-xylene [Emmi 030918 NAC3]	127895	212918	210179	444272	206278	253314	183272	226633	198412	0	100011	0	101326	0	148336	204733	209668	158680
(Ketene/hydrogen azide)	0	0	0	0	0	0	0	0	0	0	1195370	1104460	0	0	589580	4137050	0	1046280
2-Heptanone	208732	224833	0	950289	169242	0	0	0	0	551223	0	1492370	0	634523	26939.8	0	0	368501
Cyclotrisiloxane, 2,4,6-triethenyl-2,4,	9849.79	0	0	68819.5	23305	49800.2	50349.6	53239.2	71472.2	0	0	0	27042.6	60424.6	55141	19724.6	53513	75691.9
Propanoic acid, 2-methyl-, 3-methylbuty	0	0	0	0	0	0	0	0	0	26295.4	62961.4	34891.9	0	0	0	0	0	0
hexenal, 2-methyl [Emmi 021718 ASDGR2]	86012.6	121224	0	0	0	0	68494.1	226519	153616	231534	0	96414.8	384992	876667	91292.9	408164	53209	258442
Dodecane (10151504)	1197350	289867	1396280	416917	1135560	217115	0	183206	91882.1	96413	108597	229770	62354.9	77237.6	69626.4	-1	-1	-1
Heptanal	401658	527040	301013	282767	159827	325523	466804	506816	394555	219361	263456	197658	154312	379220	225200	519469	306939	254273
1,3-Diisopropoxy-1,3-dimethyl-1,3-disil	0	0	0	46265	0	0	0	0	0	0	0	85483.4	0	0	58932.7	0	0	0
Methyl hexanoate	0	0	0	0	0	0	0	0	0	0	0	0	0	0	0	0	0	0
limonene? (10151504)	1343650	515481	15546200	913243	1913210	734588	451250	572715	301143	153095	186099	267727	62492.6	148921	141409	257591	154952	177653
2-Methylbutyl propanoate	0	0	0	0	353631	281385	0	0	0	0	0	0	0	0	0	0	0	0
(2-Hexenal)(NVC019)	0	24561.6	0	0	0	0	0	0	0	0	0	0	0	0	0	0	0	0
(Dimethyl peroxide) (NVC006)	0	0	0	0	0	0	0	0	0	0	0	0	0	0	0	0	0	0
benzene, propyl [Emmi 041418 ASDRB2]	0	18359	0	28202	-1	0	-1	-1	23382.2	0	0	0	-1	0	0	0	0	0
2-Methyl-1-butanol	239106	0	260630	2322270	4751350	3705360	0	207897	149323	2415130	3879740	7917610	0	5015420	2629960	7128310	16352500	12841200
3-Methyl-1-butanol	541751	260127	662810	6405890	11964400	10088800	98256.5	552884	581511	4639080	9834960	4104260	0	3079700	1421070	3872520	5043750	6950380
(o-Methoxy-benzoyl)-tris(trimethylsilyl	-1	-1	-1	66517.1	17855.9	40814.1	56907.5	41369.3	56096.2	-1	-1	0	40093.6	55308.4	53286.4	75235.3	76838.5	90009.3
2-Hexenal, (E)-	0	0	-1	0	0	0	0	0	0	0	0	0	0	0	0	0	0	0
(isothiocyanatocyclopropane)	0	0	0	0	0	0	0	0	0	0	0	0	0	0	0	0	0	0
4-Octanone (10151504)	49731.4	0	0	30248.4	0	0	0	0	77333.8	0	0	25391.5	26087	0	0	0	0	0
2-Hexanol	0	0	0	0	0	0	0	0	0	136357	0	586145	0	435444	315227	1879950	882239	932037
benzene, 1-ethyl-2-methyl [Emmi 020318	85417.9	212458	136534	404002	133940	241341	170098	192461	192548	65665	0	107227	43213.5	119325	99113.1	70895.2	115945	113952
Butyl butanoate	0	0	0	0	0	0	0	13685.3	0	-1	60122.2	67147.9	0	44116.8	52721.8	32429	89451.6	129610
(isooctanol)	28407.1	45040	54689	0	70963.2	0	32487.8	0	32681	0	49358.4	31889.8	0	0	0	-1	34540.8	31521.8
1-Butanol, 3-methyl-, nitrate	0	0	0	0	0	0	0	0	0	0	0	0	0	0	0	0	0	0
Furan, 2-pentyl-	88630.1	82719.8	98352.2	271853	267637	158728	60441.4	98105.3	56726.9	276548	394412	364029	35346.2	374259	401327	273209	500566	270048
Decane, 3-ethyl-3-methyl-	0	0	0	42369.6	0	0	0	0	0	0	0	32516.4	0	0	0	32849.1	39821	41039.2
Butyl 2-methylbutanoate	0	0	0	0	0	0	0	0	0	-1	31567.2	87458.3	0	-1	22144.1	0	0	35888.2
2-heptanone, 6-methyl [Emmi 031418 ASDG	60972.2	101103	98878.1	201220	0	85664.9	84937.4	130899	85705.2	221815	204560	444852	45433.9	209074	129155	295055	137720	44399.8
Ethyl hexanoate	0	0	0	0	0	0	0	0	0	0	0	0	0	0	0	0	0	0
3,5 dimethyl-4-octanone [Emmi 031418 AS	0	0	0	0	0	0	0	-1	0	-1	19662.3	66126.5	0	26528.9	-1	0	0	0
Ethyl tiglate	0	0	0	0	0	0	0	0	0	0	0	0	0	0	0	0	0	0
Octane, 1-chloro- (101515504)	0	0	0	0	0	0	0	0	39157.4	80272.7	0	0	0	0	0	0	14644.5	0
Pentyl propanoate (HCV13)	0	0	0	0	0	0	0	0	0	0	0	0	0	0	0	0	0	0
SOILA5	-1	-1	-1	79863.8	-1	36173.8	62491	45622.1	66126.5	0	0	0	41225.2	62296.1	51841.4	58188.1	77817.6	76320.7
1-Pentanol	136549	122029	136937	112770	112333	136384	0	23819	38147.8	0	0	119515	-1	0	142133	940415	904315	1404210
3-Octanone	460132	0	474094	0	15064.6	0	0	0	0	968659	1024970	1221120	0	242758	0	400964	0	0
Prenyl acetate	0	0	0	131023	0	88700.6	20128.5	0	25912.3	109865	196157	134887	0	139974	0	206133	0	153812
1,3,5,7-Cyclooctatetraene	0	209083	0	835508	190929	366816	529627	219117	351375	0	0	0	105736	0	242868	0	755241	525913
(1-isocyano-3-methyl-benzene)	0	0	0	0	0	0	0	0	0	0	0	0	0	0	0	0	0	0
(isothiocyanatobutane)	0	0	0	0	0	0	0	0	0	0	0	0	0	0	0	0	0	0
Acetic acid, ethoxyhydroxy-, ethyl este	0	0	0	0	0	0	0	0	0	0	0	0	0	0	0	0	0	0
thiocyanic acid, methyl ester [Emmi 031	0	229285	0	-1	-1	181405	-1	29012.7	0	46431.8	65103.4	39548.9	0	20242.4	29756.2	-1	31121.5	28232.1
Acetic acid, mercapto-	0	0	0	0	0	0	0	0	0	-1	-1	0	0	-1	-1	12124.6	0	-1
2-methylbutyl butanoate	0	0	0	0	0	0	0	66430.6	41941.2	185485	551082	348198	0	199613	102280	29168.2	81958.8	83736.2
(NVC027)(GSV5)	0	0	0	0	0	0	0	0	0	0	68095.4	0	0	0	0	0	0	0
butanoic acid, 2-methyl, 3-methylbutyl	0	0	0	0	0	0	0	27004.3	-1	98496.7	228873	288316	0	68020.1	67966.5	56558.9	75341.3	96507.6
Hexyl acetate (HCV30)	19607.3	16250.1	40437.6	27098.4	-1	31510.1	24306.2	24465.8	-1	0	0	0	-1	0	0	18084.4	18913.4	-1
benzene, 1,3,5-trimethyl [Emmi 020218 A	116348	214131	182698	363150	183990	210808	162209	163350	191048	76818	81984	136449	58390.1	93927.3	98793.2	120676	161710	133127
(NVC028)(GSV6)	0	0	0	0	0	0	0	0	0	0	0	0	0	0	0	0	0	0
Cyclohexane, isocyanato- (10151504)	0	0	0	0	0	0	0	0	0	0	0	0	0	0	0	0	0	0
2-Methylbutyl 2-methylbutanoate	0	0	0	0	0	0	0	-1	0	-1	117576	11830.9	0	35940.2	21490.6	0	0	82602.1
2,4-dithiapentane [Emmi 031418 ASDGR2]	0	0	0	0	0	0	0	0	0	282346	472542	416296	0	241456	0	167827	121156	127829
2-Octanone	0	0	0	343407	0	0	66754.6	0	0	199828	225979	437006	0	95822.6	32224.1	485757	384063	270340
Acetoin	386175	0	358447	6533320	535078	607884	72171.9	0	0	1388580	0	1011090	0	235512	371788	0	0	403003
Cyclohexanone (10151504)	0	30924.8	0	0	0	0	0	0	0	0	0	0	0	0	0	0	0	0
Octanal	331555	416081	311823	433890	189921	376737	498049	475833	518740	256255	224697	274878	220569	287673	345621	539609	591436	641026
(1-Hepten-3-one)(NVC023)	0	0	0	0	0	0	-1	0	0	124142	427671	82823.5	0	93043.4	38194.8	73321.9	48681.4	64125.6
2-Propanone, 1-hydroxy-	366771	462472	829660	254076	269383	422096	225582	236445	232425	217918	268162	160334	291342	201025	284558	179175	216061	350104
Acetaldehyde, hydroxy- (11101510)	568410	480754	1613840	435049	0	821703	162349	187278	209335	229755	294427	166034	186440	182959	451182	0	338898	0
Arsenous acid, tris(trimethylsilyl) est	81058.3	69169.3	67581.4	107599	59828.2	91069.4	80053.7	95929.7	60093.6	49168.6	80265.4	80021.8	64110.5	0	57820.6	87470.9	81669.8	83003.8
(Pentyl butanoate)(NVC019)	0	0	0	0	0	0	0	0	0	0	0	0	0	0	0	0	0	0
2-Heptanol	0	0	0	0	0	0	0	0	0	383761	409393	1479680	0	1068450	551717	1629380	2308430	1894350
cyclohexanone, 2,2,6-trimethyl- [Emmi 0	108029	42173	61695.3	47220.2	36373.7	67147.9	-1	118338	117984	191188	173290	378311	0	40784.7	32900.4	154936	282229	64451.3
2-Isopropyl-5-methyl-1-heptanol	0	0	0	0	26323.9	0	-1	21227.3	0	0	0	0	15718.1	0	-1	-1	23269.7	-1
2-Penten-1-ol, (Z)-	0	0	0	135052	0	0	0	0	0	0	0	0	0	0	0	0	0	0
Propyl hexanoate	0	0	0	0	0	0	0	0	0	0	0	0	0	0	0	0	0	0
a-Methylstyrene (10151504)	89155.9	62329.8	246006	71388.2	80907.1	73426.1	105388	153676	70906.1	0	22143.5	23741.6	22752.2	28535.3	28017.4	45486	22538.9	32175.1
6-octen-2-one [Emmi 031418 ASDGR2]	45526.5	0	69053.6	699859	0	188357	0	112272	52029.6	231727	306726	997256	0	250057	135116	339782	295926	225922
2-Heptenal, (E)-	73355.5	76354.1	-1	-1	39188	-1	30817.9	-1	-1	0	0	506227	0	0	0	0	-1	0
Pentyl 2-methylbutanoate (GSV17)	0	0	0	0	0	0	0	0	0	0	0	0	0	0	0	0	0	0
(E)-2-Hexenyl acetate	0	0	0	0	0	0	0	0	0	0	0	0	0	0	0	0	0	0
2-hexanol, 3-methyl [Emmi 031418 ASDGR3	0	0	0	0	0	0	0	0	0	-1	-1	61483	0	-1	16026	-1	43229.8	-1
6-Methyl-5-hepten-2-one,	160232	194491	234488	285106	345705	276733	492161	623730	384749	196520	238677	227480	503717	419761	367058	905816	645711	619409
Hexyl propanoate	0	0	0	0	0	0	0	0	0	0	0	0	0	0	0	0	0	0
Z-2-dodecenol [Emmi 030918 ASDWH1]	-1	-1	-1	15326.6	-1	-1	15010.8	20538	29517.6	-1	-1	-1	17775.1	13987.7	-1	54100.3	54001.9	66568.3
Hexyl 2-methylpropanoate	0	0	0	0	0	0	0	0	0	0	0	0	0	0	0	0	0	0
(AITC2)	0	0	0	0	0	0	0	0	0	0	0	0	0	0	0	0	0	0
Anisole	0	0	0	0	0	0	0	0	0	0	0	-1	0	0	0	0	0	-1
2-Butenoic acid, butyl ester (11101510)	0	0	0	0	0	0	0	0	0	0	0	269817	0	0	0	0	0	0
2-isopropylpyrazine [Emmi 031218 ASDWH3	0	0	0	0	0	0	0	-1	0	0	0	0	0	0	0	-1	0	0
6-butyl-1,4-cycloheptadiene [Emmi 03121	0	0	0	0	0	0	0	75502.3	75420.2	69904.8	0	0	0	0	0	0	0	0
1-Hexanol	44442.7	102346	149182	74489.5	83679.1	73155.6	44054.6	-1	-1	55592.9	119831	106525	-1	21777.8	66133.2	310162	565135	1124420
cyclohexanol, 2,3-dimethyl- [Emmi 03141	0	0	0	0	0	-1	35866.3	0	0	0	52856.2	107797	0	43765.7	39711.8	55829.1	73676.4	61642.6
2-Cyclopenten-1-one (less than 80 10151	48004.3	65450.5	91949.8	0	0	57825.6	0	0	0	0	0	0	39728.6	0	0	0	0	0
3-Hexanol, 2-methyl- (less than 80 1102	0	0	0	0	0	0	0	0	0	0	0	0	0	0	0	0	0	0
2-Hydroxy-3-pentanone	0	0	0	259946	0	0	0	0	0	0	0	0	0	0	0	0	26350.8	0
3-Hexen-1-ol, (E)-	0	0	0	0	0	0	0	0	0	0	0	0	0	0	0	0	0	0
Ethanol, 2-(vinyloxy)-	23341.9	24072.7	0	-1	0	66636.5	26181.1	-1	0	0	18725.3	0	-1	-1	0	0	0	48284.9
Cyclohexasiloxane, dodecamethyl-	215316	174094	424361	163681	245001	142933	842861	1427450	890598	514292	1102800	405490	121835	101498	84164.1	4302010	1670840	1941900
(4-octanol?) (10151504)	0	0	0	0	0	0	0	0	0	0	0	0	0	0	0	0	-1	0
6-[(Z)-1-butenyl]-1,4-cycloheptadiene [	0	0	0	0	0	0	0	191056	172076	158174	75594.2	0	0	55866.7	0	106356	0	38061
SOILB1	0	0	0	-1	0	12994.7	21207.4	-1	-1	0	0	0	-1	-1	-1	-1	-1	36773.4
acetic acid, 2-ethylhexyl ester [Emmi 0	0	0	0	0	0	0	0	0	0	0	0	0	0	52509.9	0	78797	0	114329
Dimethyl trisulfide (! 11101510)	0	0	0	0	0	0	119885	247630	17671.8	735595	1584740	5216840	10930.3	5812070	3873010	6583700	2642230	3487780
3-Hexen-1-ol, (Z)-	247813	112204	334668	107775	134884	136480	0	0	0	0	0	0	0	0	0	0	0	0
nonanal [Emmi 022318 ASDGR3]	964170	1155680	1179320	1285590	734708	1199110	1656350	1514200	2165710	1700130	1843850	1768650	1221500	1343410	1644080	2525150	2944510	3075970
2-Nonanone	61315.5	80010.5	52773.8	65376.3	37887.2	0	40978.6	0	0	392359	0	0	0	329868	0	815816	0	211403
(3-Octanol)(NVC020)	0	0	28430.6	0	0	0	17700.4	0	0	205219	0	1102810	0	0	0	0	1243510	41785
(Pentamethylethanol)(NVC021)	41424.4	0	40566.8	82400	29160.1	44075.9	12455.7	43695.7	0	221187	284651	591758	0	370289	146027	482892	694744	421908
(NVC009)	0	0	0	0	0	0	0	0	0	0	0	0	0	0	0	0	0	0
Pentane, 1-nitro-	0	0	0	0	0	0	0	0	0	0	0	0	0	0	0	0	0	0
Ethanol, 2-butoxy- (less than 70 101515	34917.1	48298.3	15792	409146	32034.2	38766	27873.7	34935.5	-1	0	-1	0	-1	29401.7	-1	84146.2	-1	25914
2-cyclohexen-1-one, 3,5,5-trimethyl [Em	32155.2	0	43627.9	84257	0	40758.5	68179.4	62741.3	49007.3	189044	127235	824351	0	98947	185675	123302	490316	159711
2-Hexen-1-ol, (E)-	0	0	0	0	0	0	0	0	0	0	0	0	0	0	0	0	0	0
2,4-Hexadienal, (E,E)-	0	0	0	0	0	0	0	0	0	0	0	0	0	0	0	0	0	0
5-Hexen-1-ol (ISTD)	0	0	0	0	0	0	0	0	0	0	0	0	0	0	0	0	0	0
Dodecane, 4,6-dimethyl-	26867.7	0	78711.4	-1	47205.3	0	0	55666.8	113576	0	0	44596.9	0	0	0	0	100276	0
4-Hexen-1-ol, (E)-	0	0	0	0	0	0	0	0	0	0	0	90088.3	0	0	0	0	0	0
2-octanol (R) [Emmi 031418 ASDGR3]	0	0	0	0	0	0	0	0	0	-1	25441.9	51769.2	0	21373	21147.8	43651.6	61175.5	54245.5
N,N-Dimethylacetamide	0	0	0	0	0	0	0	0	0	0	0	0	0	0	0	0	0	0
2-Hexen-1-ol, (Z)-	0	0	0	0	0	0	0	0	0	0	0	0	0	0	0	0	22505.3	0
Butyl hexanoate	0	0	-1	0	0	0	0	0	0	0	0	0	0	0	0	15153.2	-1	-1
Hexyl butanoate	0	0	0	0	0	0	-1	0	0	0	0	0	0	0	0	0	0	0
2-Octanol	0	0	0	0	0	0	0	0	0	27184.9	50977.9	99664.3	0	49897.7	46675.4	75725.6	135047	93681.8
Benzene, 1,3-bis(1,1-dimethylethyl)-	155988	125068	230931	174329	114762	102371	168778	257606	143993	228748	256459	219356	193344	150074	128570	190894	164667	154530
Cyclotetrasiloxane, octamethyl-	63104.2	59293.9	55199.8	50119.4	35059.9	54539.5	46105.9	53729.8	41863.9	32926.3	43837.9	50972.9	33658.8	35678.2	31248	79403.5	60911.8	69701.5
Hexyl 2-methylbutanoate	0	0	0	0	0	0	0	0	0	0	0	0	0	0	0	0	0	0
Acetic acid	4323340	3817730	5699660	7929570	2578100	2947700	5071270	3836200	4787220	6639260	11362700	23601200	3654010	17281600	16741900	15481100	48917800	45354400
benzene, 1-methoxy-4-methyl [Emmi 02231	0	0	0	0	0	0	0	-1	0	63752.6	50304.2	237713	0	108963	119690	55133.2	507111	254360
2-Octenal, (E)-	56369.9	77132.6	0	0	0	0	0	0	0	0	0	0	0	0	0	0	68389.4	77612.6
Benzene, 1,4-dichloro-	3055340	2952730	5183810	5778610	3727080	4063100	4116410	4241140	3893850	2689740	3064880	4897660	2807940	3259590	3104270	4277180	3909850	3220740
Ethyl octanoate	0	0	0	0	0	0	0	0	0	0	0	0	0	0	0	0	0	0
(2-propenyl-thiocyanic acid)	0	0	0	0	0	0	0	0	0	0	0	0	0	0	0	0	0	0
1-octen-3-ol [Emmi 031418 ASDGR2]	19726.6	19709.4	-1	0	0	0	0	0	0	29287.4	167303	0	0	0	0	0	0	0
((Z)-Linaloloxide) (GSV15)	0	0	0	0	0	0	0	0	0	0	0	0	0	0	0	0	0	0
Propanoic acid, 2-oxo-, methyl ester (1	-1	-1	31711.1	-1	-1	17854.1	-1	0	-1	-1	0	0	-1	-1	-1	-1	0	18170.9
Benzene, 1,4-dichloro-	3055340	2952730	5183810	5778610	3727080	4063100	4116410	4241140	3893850	2689740	3064880	4897660	2807940	3259590	3104270	4277180	3909850	3220740
dl-6-methyl-5-hepten-2-ol [Emmi 031418	0	0	26398.9	0	0	0	0	0	0	122195	54026.2	224408	0	143052	117820	230568	209196	315791
(1-Heptanol) (NVC001)	-1	22258.9	35137.2	29803.2	0	0	27778.8	-1	27208.7	44130.2	53384.2	27969.3	25525.9	0	0	67846.5	53866.1	70631.8
glycidol [Emmi 020218 ASDGR1]	361444	510219	157119	92892.2	37692.5	142965	388607	192168	146054	88499	115357	145655	178549	157180	86170.6	0	164872	336630
2-Hexanone, 3,3-dimethyl- (10151504)	42174.8	33037.2	37366.6	46459.5	-1	42402.6	30560.4	37966.3	-1	33863.5	-1	32210.3	29317.7	22792.6	40650.6	46176.5	28681	28349.4
6-Methyl-5-hepten-2-ol,	0	0	-1	0	0	0	0	0	0	251387	44790.7	414300	0	220406	227063	0	407264	380448
2-Methylbutyl hexanoate	0	0	0	0	0	0	0	0	0	0	0	0	0	0	0	0	0	0
(3-Furaldehyde)(NVC029)	0	0	0	0	0	0	0	0	0	0	0	0	0	-1	0	0	0	0
Furfural	221103	305298	414537	185474	208953	237080	148368	163499	159072	165897	154484	0	150980	165581	166443	0	201797	194919
3-Isopropoxy-1,1,1,7,7,7-hexamethyl-3,5	2778340	2650930	3618040	1335810	2216200	1147180	2579800	2851710	2354700	2681480	3264600	2663680	2036400	1532800	1053760	3930240	2525080	2600830
ethane-1,1-diole dipropanoate [Emmi 050	0	0	0	0	0	0	0	0	0	0	0	0	0	0	0	0	0	0
2-Ethyl-1-hexanol	135731	115503	154484	634628	154234	248123	342448	627327	389711	1077280	1276010	1543660	548127	4735090	978839	7808800	1190640	2869820
Cyclohexanecarbonitrile, 1-(1-piperidin	0	0	0	0	0	0	0	22986	0	-1	19083.3	0	0	0	0	0	0	0
3-Hydroxy-4-methoxybenzaldehyde, tert-b	24059.3	19985.8	25509.1	31985.5	17705.5	30439.9	20728.1	23184	-1	12588.2	16393.4	-1	21425	-1	-1	21945.4	22110.5	19610.6
Decanal	563629	563843	717518	889804	512020	858972	1129530	1098900	1258550	860088	1527270	1453750	1282700	1155930	1347100	2022710	2398890	2812060
Benzaldehyde, 2,5-bis[(trimethylsilyl)o	131331	87404.3	151010	595459	121177	261482	367191	483376	422038	97519	95079.6	122717	297162	398101	333759	463897	405219	499435
Pentyl hexanoate	0	0	0	0	0	0	0	0	0	0	0	0	0	0	0	0	0	0
4-ethyl-2-octanol [Emmi 031418 ASDGR3]	0	0	0	0	0	0	0	0	0	110242	39385.9	42808.1	0	264230	25725.8	783960	190613	275463
SOILA6	0	0	0	0	0	0	0	0	0	0	0	0	0	0	0	0	0	0
Propanoic acid (! 11101510)	1843680	2142720	2348450	2897440	1909500	1344670	1331340	2478140	1141680	1120040	1597710	3548240	1436910	3803810	2221560	2817030	6766580	6209090
Benzaldehyde	727521	759812	726410	698532	600684	706902	497582	384923	486441	347864	381926	533252	391433	381847	395919	653237	581492	631495
(DL-2,3-Butanediol)(NVC010)	0	0	0	0	0	0	0	0	0	0	0	0	0	0	0	0	0	0
2-Nonenal, (E)-	49124.9	56382.5	33981.4	28163.1	20319.4	20752.5	39073.4	15980.2	34387.9	13203.7	19950.4	12378	22482.3	26735.5	-1	41535.2	25886.7	34312.2
linalool	101010	28179.9	463431	139275	113751	65889.6	-1	36592.1	-1	-1	-1	103590	0	-1	-1	16454	27209.4	-1
benzene, 1-(chloromethyl)-2-methyl [Emm	0	0	0	0	0	0	0	0	0	0	0	-1	0	0	0	0	0	0
cyclodecene, 1-methyl [Emmi 031218 ASDW	-1	-1	49919.5	25087.4	21940.8	20218.9	-1	-1	22465	11985.1	-1	-1	-1	-1	-1	0	-1	-1
1-Octanol	73882.6	70104.4	87192.4	123347	39375.8	65484.1	56315.2	64299.4	87279.2	62887.4	69787.6	29084.9	50505.8	55783.6	62067	115847	177348	165769
4-penten-1-ol, 2-methylene [Emmi 031418	58321.8	88567.9	109220	0	85073.3	70522.5	91141.8	0	73797.1	42818	89880.5	0	0	0	0	0	0	100353
2-Methylpropanoic acid	85177.1	66230.6	76643.3	122178	55023.6	69915.3	79614.4	62645.5	48635	565601	1172330	4576480	55848.4	1652020	1488100	1345270	5554720	5369070
Propanoic acid, 2-hydroxy-, ethyl ester	0	0	0	0	0	0	0	0	0	0	0	0	0	0	0	0	0	0
Dimethyl Sulfoxide (11021517)	0	0	0	264198	0	0	0	0	247302	188471	219077	415410	0	0	451377	1508290	1057820	1479860
2,4,4-trimethylbut-2-enolide [Emmi 0314	0	0	0	94542	-1	34246.8	-1	85180.4	-1	117817	94592.4	134489	0	81428.5	-1	0	-1	26308.1
isobornyl acetate [Emmi 020218 ASDGR3]	64827.8	15271.2	237056	0	53909.5	0	0	0	0	0	0	0	0	0	0	0	0	0
Hexadecane (10151504)	23269.1	-1	45516.5	0	0	12949.2	-1	16620.2	21606.8	0	39587.9	0	0	0	0	23256.2	0	0
Methyl decanoate	0	0	0	0	0	0	0	0	0	0	0	0	0	0	0	0	0	0
1-propene, 2-(1-methylethoxy) [Emmi 031	0	0	-1	0	0	0	0	0	0	-1	-1	19035.4	0	20954.7	13849.9	30788.4	26671.7	31150.6
Undecanal (10151504)	-1	-1	38186.4	55224.8	23140.3	27819.8	49138.3	52044.7	45946.3	65350.3	73783.9	94276.6	55784.4	58712.6	60073.4	105077	134760	101578
(ethylene/nitric oxide)	0	0	0	0	0	0	0	0	0	0	0	0	0	0	0	0	0	0
Benzonitrile (10151504)	161362	174841	146724	189897	133147	157734	119431	92521	121216	81612.7	120112	133536	100877	70670.9	72661.7	127704	104301	132905
Butanoic acid (! 11101510)	390096	388389	440341	351253	294837	197067	317476	416272	248741	5043020	9336100	34299700	247279	15011200	8718340	9188350	30301800	39308800
Hexyl hexanoate	0	0	0	0	0	0	0	0	0	0	0	0	0	0	0	0	0	0
Pentanoic acid, octyl ester	0	0	0	0	0	0	0	0	0	0	0	0	0	0	0	0	0	0
Butyl octanoate	0	0	0	0	0	0	0	0	0	0	0	0	0	0	0	0	0	0
2-propenoic acid [Emmi 031418 ASDGR2]	59645.1	44819	51588.9	39166.5	29773.1	31076.3	79567.5	63095.6	44280.3	23317.7	191471	55517.3	61172.2	88499	74602.8	247871	85772.4	142304
(1,2-Ethanediol) not likely	0	0	0	0	0	0	0	0	0	0	0	0	83232.2	0	0	0	0	0
Cyclooctasiloxane, hexadecamethyl-	1223300	1283070	1354040	1080500	1317770	1122730	1130410	947218	602930	362738	517282	475320	752675	518227	420859	774542	535616	466765
(4,5-dihidro-2(1H)-pentalenone)	0	0	0	0	0	0	38346	0	0	0	-1	0	0	0	0	0	0	0
(NVC011)(ESTER)	0	0	0	0	0	0	0	0	0	0	0	0	0	0	0	0	0	0
(Silanediol, dimethyl-) not likely	1039660	1170150	1176080	1451060	1168380	1272150	993441	868575	1227800	731973	876287	967145	444240	303280	929848	1431910	979026	981093
Butyrolactone	104857	113788	131641	62541.4	68108.9	73531.9	93423.1	74398.8	80325.8	49230.7	65205.8	67858.6	62575	58190.2	78842.4	117244	62771.5	69236.2
2-Furanmethanol (10151504)	119801	138498	211977	80569.2	89684.5	69953.5	66417.1	56115.4	73728.5	75074.2	65951.8	25329.4	100351	46771.2	93666.7	50489.3	51695.3	0
Phenyl acetaldehyde	0	57187.2	69222.7	61256.4	55836.1	74329.8	0	63418.9	60976.7	39599.3	44553.6	0	51114	24459.1	37013.8	69701.7	60276.6	43132.3
2-Decenal, (E)-	-1	-1	0	-1	-1	-1	0	0	0	15620.6	0	-1	-1	-1	-1	-1	-1	-1
(trimethylamine)	0	0	0	0	0	0	0	0	0	0	0	8774930	0	2192550	0	0	7105210	7506990
Acetophenone (11101510)	612963	684783	786579	961108	637530	816818	425786	398108	498207	328185	358221	449696	363787	344108	346256	590235	543487	640626
1-nonanol [Emmi 022318 ASDGR1]	28674.2	-1	30409.7	-1	17331.9	23669.5	20198.1	-1	43969	29706.6	-1	34348.7	41574	41547	26975.2	106701	108436	86401.7
cyclohexene, 1-chloro-5-(1-chloroetheny	0	0	0	0	0	0	0	0	0	227302	83322.1	479805	0	0	0	0	0	0
a-Piperidinopropiophenone	0	0	0	0	0	0	0	0	0	0	0	0	0	0	0	0	0	0
Butanoic acid, 3-methyl- (11021517)	52651.2	41594.2	49477.7	34510.6	30426.5	21875.3	35577.4	41149.9	22431.4	357254	659869	3032230	28053.6	872022	981421	994548	2817200	3414230
disulfide, methyl (methylthio)methyl [E	0	0	0	0	0	0	0	0	0	112221	204374	266787	0	71450.4	93387.8	130365	66099.6	127561
Ethyl trans-4-decenoate	0	0	0	0	0	0	0	0	0	0	0	0	0	0	0	0	0	0
Decane, 1-chloro-	-1	-1	-1	-1	-1	-1	-1	0	-1	-1	0	27617.2	0	0	0	-1	-1	0
(methyl 1-propenyl disulfide)	0	0	0	0	0	0	0	22055	24081.1	16085.3	21211.7	0	0	0	0	0	24786.7	0
Cyclohexene, 1-chloro-4-(1-chlorothenyl	0	0	0	0	0	0	0	0	0	211013	197669	487140	0	0	0	0	0	0
2-Methylbutanoic acid	64465	62100.7	78501.4	55804.6	44997.1	35567.3	44666.2	58077.6	36168.7	561110	1078900	5394040	0	1417580	1170270	1090840	3635750	5005490
Estragole	0	0	0	0	0	0	0	0	0	0	0	0	0	0	0	0	0	0
2-Propenoic acid, 2-methyl- (below 80 1	118558	105524	143324	122786	93736.3	153854	1473630	308351	113017	103182	119275	124428	96463.9	127470	110133	140930	135846	293575
(methyl 2,4 hexadienoic acid))	0	0	0	0	0	0	0	0	0	0	0	0	0	0	0	0	0	0
2-Ethyl benzaldehyde	0	0	0	0	0	0	0	0	0	0	0	0	0	0	0	0	0	0
2-Pyrrolidinone, 1-methyl- (10151504)	0	0	0	0	0	0	0	0	0	0	0	0	0	0	0	0	0	0
Salicylaldehyde	25186.6	27694.8	27137	31604.2	23944.1	30992.6	26204.6	0	24704.4	0	22228.1	21929	23350.3	-1	-1	29709.1	26142.5	28245.8
Heptadecane (10151504)	11224.1	25450.2	0	0	-1	38072.2	0	0	12312.7	0	276558	26201.3	-1	22507	0	31681.4	0	38016.2
2(3H)-Furanone, 5-ethyldihydro- (110215	0	26644.8	33847.3	50279.5	19649.3	0	0	0	29905.5	52700.5	62300	212502	0	86947.6	77264.9	125012	216772	161962
2-furoic acid, 4-cyanophenyl ester [Emm	0	0	0	0	0	0	0	23820.2	0	23234.4	23869.4	0	0	0	0	0	-1	0
Dodecanal (10151504)	-1	-1	14085.1	12361.4	-1	-1	26307.5	22493.6	15106.6	0	25145.1	36539.2	31508.4	29615.7	27838.2	43661.5	42434.5	59380.4
2(5H)-Furanone, 3-methyl- (below 80 101	0	0	0	0	0	0	0	0	66277.7	29919.1	-1	34806.2	0	44066.4	0	117983	57555.1	42095.8
(Z,E) a-farnesene	0	0	0	0	0	0	0	0	0	0	0	0	0	0	0	0	0	0
(4-nitrophenyl-2-thiophencarboxylic aci	0	0	0	0	0	0	0	0	0	0	0	0	0	0	0	0	0	0
Pentanoic acid (! 11101510)	159052	196318	135845	113870	91519.7	20134.8	193821	183310	99073	113534	282623	336139	129387	381076	161592	744494	799865	936877
Oxime-, methoxy-phenyl-_	46457.8	0	0	0	10230.5	82969.5	0	0	105075	0	42400.1	71961.6	0	0	86941.9	25794.7	0	233262
4-Ethyl-benzaldehyde	0	0	0	0	0	0	0	0	0	0	0	0	0	0	0	0	0	0
a-farnesene	0	0	0	0	0	0	0	0	0	0	0	0	0	0	0	0	0	0
Acetamide (10151504)	0	39310.3	0	0	110691	0	55131	0	46241.7	61514.9	99805.4	56777.5	132073	56199.6	44251.8	158758	110451	140569
Naphthalene	0	0	0	0	86282.6	0	0	0	0	110779	157653	227568	0	0	0	124873	132424	142837
pentenal, 5-(benzoyloxy) [Emmi 031418 A	0	0	0	0	0	0	0	0	0	0	0	120919	0	0	0	0	96264	111485
Benzenemethanol, .alpha.,.alpha.-dimeth	554380	281324	1429530	394548	589705	407161	691567	920338	286759	50398.3	89934.1	0	100992	67856.9	73657.9	128675	0	0
2(5H)-Furanone	0	110336	0	0	0	0	0	0	0	77937.8	149762	0	98595.8	0	94016.1	106623	148489	166103
Ethyl trans-2-decenoate	0	0	0	0	0	0	0	0	0	0	0	0	0	0	0	0	0	0
1-chloroundecane [Emmi 041318 ASDRB1]	0	0	0	0	0	0	0	0	0	0	0	0	0	0	0	0	0	0
2-Cyclopenten-1-one, 2-hydroxy-	144316	67873.7	216915	122582	130250	103852	86148.7	102852	84156.2	79599.4	174542	64772.3	106445	109914	133615	172138	143877	140260
Pentyl glycolate (less than 80 10151504	0	0	51650.8	0	0	0	0	0	0	0	0	0	0	0	0	0	0	0
formamide, N,N-dibutyl- [Emmi 031418 AS	38130.5	72072	0	49494.5	-1	73820.9	84235.2	60248.2	155047	39345.6	105163	76772.6	100547	42859.7	88841.8	134380	105512	184684
Cyclotrisiloxane, hexamethyl-	0	0	0	0	0	0	0	0	0	0	0	0	0	0	0	0	0	0
Methyl salicylate	0	0	0	0	0	0	0	0	0	0	0	0	0	0	0	0	0	0
Octadecane (10151504)	-1	0	28010.6	0	-1	-1	0	1261120	325263	97196.9	1180180	445498	0	0	0	162513	0	-1
Pentanoic acid, 4-methyl- (below 80 111	0	0	0	0	0	0	0	0	0	-1	0	208604	0	20121.4	-1	0	-1	-1
Ethylamine, 2-((p-bromo-.alpha.-methyl-	0	0	0	0	0	0	0	0	0	0	0	0	0	0	0	0	-1	0
ethanol, 1-(2-butoxyethoxy) [Emmi 03091	0	0	0	0	0	0	0	0	0	0	0	0	0	0	0	55505.6	0	0
(Methyl 2,4-Decadienoate)(NVC024)	0	0	0	0	0	0	0	0	0	0	0	0	0	0	0	0	0	0
Hexyl octanoate	0	0	0	0	0	0	0	0	0	0	0	0	0	0	0	0	0	0
Z-2-Dodecenol (below 70 10151504)	-1	-1	-1	15326.6	-1	-1	15010.8	20538	29517.6	-1	-1	-1	17775.1	13987.7	-1	54100.3	54001.9	66568.3
oxazirane, 2-(dimethylethyl)-3-methoxy-	21546	28710.7	34587.8	-1	21718	23429.3	-1	27893	28234.1	13873.4	48637	34109	24515.1	28187	28798.6	56313.6	48392.4	39970.6
(Uracil)	23970.2	24321.3	31256.4	15449.3	0	18740.4	0	0	0	-1	25541	0	24223.6	16890.7	-1	26813.4	23639.3	19089.4
(5-cyano-1,2,3-thiodiazole)	0	0	0	0	0	0	0	0	0	0	0	0	0	0	0	0	0	0
Ethyl salicylate	0	0	0	0	0	0	0	0	0	0	0	0	0	0	0	0	0	0
2-Phenylethyl acetate	0	0	0	0	0	0	0	0	0	0	0	0	0	0	0	0	0	0
(E,Z)-Ethyl 2,4-decadienoate	0	0	0	0	0	0	0	0	0	0	0	0	0	0	0	0	0	0
Hexanoic acid	257443	230204	147696	138832	40114.7	134644	293419	196545	121121	123579	349203	233268	148701	205946	134718	483297	387336	365247
5,9-undecadien-2-one, 6,10-dimethyl- [E	231473	205772	48206.5	118385	118828	373364	150431	132844	111769	119230	45336.5	70059.4	333125	327249	336665	319896	471890	455663
(4-Methyl-1,5-heptadiene)(NVC002)	0	0	0	0	0	0	0	0	0	0	0	0	0	0	0	0	0	0
oxazolidine, 2,2-diethyl-3-methyl [Emmi	0	25371.4	0	0	28863.6	27190.3	0	0	0	0	0	0	0	0	0	0	45519.6	0
(NVC030)	0	0	0	0	0	0	0	0	0	0	0	0	0	0	0	0	0	0
2-Methyl-2-propenyl 2-propenoate (NVC00	0	0	0	0	0	0	0	0	0	0	0	0	0	0	0	0	0	0
Propanoic acid, 2-methyl-, 1-(1,1-dimet	95825.5	48212.9	76082.2	56152.3	71326.1	125970	52026.2	0	47266.8	81748.4	70224	0	227048	0	0	104834	90212.6	22945.4
Benzyl alcohol	20272.5	18486.7	21443.3	-1	-1	0	-1	0	15402.2	14881.4	29618.4	38739.4	-1	-1	-1	26665	19915.8	33146.4
4-Methyl-5H-furan-2-one (10151504)	-1	0	0	0	0	0	0	0	0	0	0	0	0	0	0	0	0	0
(cis-2,6-Dimethyl-2,6-octadiene) (NVC00	0	0	0	0	0	0	0	0	0	0	0	0	0	0	0	0	0	0
dimethyl sulfone [Emmi 031418 ASDGR2]	0	0	27985.9	0	21537.2	0	70203.8	0	319170	88584.7	70182.5	390032	0	243719	234526	293378	1645490	2271420
1,5-cyclooctadiene, 1,6-dichloro [Emmi	0	0	0	0	0	0	0	0	0	183112	153586	508418	0	0	0	0	0	0
phenylethyl alcohol [Emmi 031418 ASDGR2	13577.8	0	-1	29359.7	0	0	0	0	0	29372.8	46308.3	114736	0	49794.4	25102.6	61032.7	97893.6	93802.8
Butylated Hydroxytoluene	0	0	17461.9	-1	-1	0	0	-1	-1	0	-1	20515.4	0	-1	0	0	-1	18112.1
(2-propenamide)	0	0	0	0	0	0	0	0	0	0	0	0	0	0	0	0	0	0
Heptanoic acid (11101510)	60130.8	57593.3	44019.4	55878	30741.3	14683.2	86147	74299.7	43868.2	14281.1	260376	-1	65393.2	17184.7	58208.6	299383	74746.6	75974.6
methenamine [Emmi 030918 NAC3]	0	46776.2	0	0	27815.1	0	67043.8	0	0	0	0	0	269889	0	0	0	0	0
SOILA7 (1-Dodecanol)	24022.3	24673.5	32587	-1	135845	27073.2	29025.4	0	31861.2	28689.4	105591	76656.7	28496.2	20057.5	36154.9	58046.6	48456.2	57099.8
Ethanol, 2,2'-oxybis- (10151504)	0	0	51308.6	0	0	0	0	0	0	0	75910.8	0	0	0	20067.6	0	0	0
Benzothiazole	86170.6	76609.7	93522.2	106754	85235.7	89685.1	147054	148339	147707	266087	364027	442966	111019	121158	93463.4	162485	121504	138603
Sulfurous acid, 2-ethylhexyl hexyl este	49707.8	52951.9	0	0	0	73380.7	0	0	0	181230	8100790	606110	0	0	0	839187	0	0
dodecyl acrylate [Emmi 030918 ASDWH1]	0	0	0	0	0	0	0	0	0	0	204350	149402	0	0	0	50593.8	0	0
Levoglucosenone	-1	31579	0	65585.5	-1	0	0	0	0	0	0	0	0	0	0	0	24341.5	0
(NVC032)(Glycerin)	0	0	0	0	0	0	0	0	0	0	0	0	0	0	0	0	0	0
(vinylfuran?)	253606	300456	234619	202653	208510	208471	223156	173873	191389	255221	366885	1049510	196713	311996	256442	500238	331632	479669
(NVC012)	0	0	0	0	0	0	0	0	0	0	19635.8	0	0	0	0	0	0	0
3-Furancarboxylic acid, methyl ester (1	50695.6	42601.4	0	32116.6	39186	0	0	0	16795	0	89278.6	0	-1	22800.1	28902.1	61216.5	28561.7	0
2-nonanone, 9-hydroxy- [Emmi 031418 ASD	0	0	0	0	0	0	0	0	0	0	102809	-1	0	0	0	-1	0	0
(Methyl 9-dodecenoate, (E)-)(NVC025)	0	0	0	0	0	0	0	0	0	0	0	0	0	0	0	0	0	0
Vanillin	0	0	0	0	0	0	0	0	0	0	0	0	0	0	0	0	0	0
phenol, 4-ethyl-2-methoxy [Emmi 020318	0	0	0	29277.4	0	0	-1	0	0	0	0	0	0	0	0	0	0	0
(NVC013)(Ethyl 9-tetradecenoate)	0	0	0	0	0	0	0	0	0	0	0	0	0	0	0	0	0	0
1,2,3-propanetriol, diacetate [Emmi 041	0	0	0	27304.2	0	0	0	0	0	0	-1	44881.6	0	0	0	56085.1	0	0
triacetin [Emmi 042018 ASDRB1]	0	0	0	-1	0	-1	-1	-1	32311.6	0	0	0	-1	-1	-1	0	-1	19193.4
Octanoic Acid	-1	-1	32237.5	-1	-1	-1	15783.6	-1	31525.2	-1	280459	55540.8	-1	35327	26789.3	356194	-1	-1
(NVC014)(triunsaturated)	0	0	0	0	0	0	0	0	0	0	0	0	0	0	0	0	0	0
(1-Octen-3-one)(NVC008)	0	0	0	0	0	0	0	0	0	0	0	0	0	0	0	0	0	0
p-Cresol (! 11101510)	70644	59377.9	84697.2	93078.7	45111.4	44457.8	72441.6	74262.7	65592.2	2190000	3034030	16520600	51733.9	4882910	3493020	9764350	14328200	10059700
phenol, 2-chloro-4-(1,1-dimethylethyl)	0	0	0	0	0	0	0	0	0	38015	35965.4	80892	0	0	0	0	0	0
Cyclopropyl carbinol	448577	488420	432905	350465	245336	261895	157140	223801	286872	172857	822830	0	203913	165073	254458	433731	152884	280596
(NVC015)	0	0	0	0	0	0	0	0	0	0	0	0	0	0	0	0	0	0
NVC007	0	0	0	0	0	0	0	0	0	0	0	0	0	0	0	0	0	0
Ethanol, 2-[2-(ethenyloxy)ethoxy]- (bel	0	0	0	0	0	0	0	0	0	0	0	0	0	0	0	0	0	0
Nonanoic acid (11101510)	-1	-1	45496.1	55698.7	38557.7	27743.5	95168.5	70439.7	51540.7	42593	874875	122262	-1	-1	50240.4	516909	45615.4	78363.6
Cycloheptane, methyl- (below 80 1015150	0	0	0	0	46954.3	0	0	0	0	0	112380	63757.3	0	0	0	104457	0	-1
Eugenol	0	0	0	0	0	0	0	0	0	0	0	0	0	0	0	0	0	0
3,5-Dimethyldodecane (11021517)	235074	261008	103463	166491	23790.5	1579370	83144.9	-1	35254.8	920296	17769400	5430870	24691	26654.9	23362.1	3040970	14855.9	169098
Caprolactam	0	0	0	0	0	0	0	0	0	0	0	0	0	0	0	0	0	0
hexadecanoic acid, methyl ester [Emmi 0	0	0	0	0	0	0	0	0	0	0	414330	123512	0	0	0	160080	0	0
ketone, methyl 2-methyl-1,3-oxothiolan-	77802.5	84707.3	69281.5	132929	73352.2	99790.3	111430	50589.4	418718	109692	816724	170751	209185	137372	147983	229962	100661	159667
Diisooctyl phthalate	0	0	0	0	0	0	0	0	0	0	0	0	0	0	0	0	0	0
Isopropyl Palmitate (less than 80 11101	0	0	0	0	0	13732.3	0	0	0	0	146382	17525.8	0	0	0	93928.6	0	0
pentadecanoic acid [Emmi 032418 ASDWH2]	0	0	0	0	0	30454.8	0	447420	0	0	0	0	239952	0	0	675528	0	0
Methyl anthranilate	0	0	0	0	0	0	0	0	0	0	0	0	0	0	0	0	0	0
4-Methyl-2-oxopentanenitrile (less than	0	0	0	0	-1	0	0	0	0	0	53694.5	0	0	0	0	25522.7	0	0
n-Decanoic acid (! 10151504)	0	0	50899	0	32461	0	59130.9	0	0	0	932012	113793	52236.2	0	26427.5	651579	0	74071.2
Cinnamyl alcohol	0	0	0	0	0	0	0	0	0	0	0	0	0	0	0	0	0	0
Methyl dihydro Jasmonate	0	0	0	0	0	0	0	0	0	0	0	0	0	0	0	0	0	0
(NVC033)	0	0	14042.8	0	-1	0	0	0	0	0	0	0	0	0	0	0	0	0
tricosane, 2-methyl- [Emmi 031418 ASDGR	1134030	513657	121392	1304660	379427	166727	591309	851952	254329	124407	646340	712193	120253	0	0	80229.6	350807	2123180
Methyl jasmonate	0	0	0	0	0	0	0	0	0	0	0	0	0	0	0	0	0	0
(E,E)-Farnesol	0	2583040	282673	1022320	129164	0	5253500	0	0	0	0	0	0	592249	264586	0	157628	2437650
Diethyl Phthalate	362843	191286	334105	218376	261487	359495	315865	258385	294318	288706	992510	363679	296774	185549	118964	1176560	359478	624070
docosane, 7-hexyl- [Emmi 031418 ASDGR2]	46715.8	1313690	579583	1886490	819519	791838	2404750	19121000	10487500	3030590	1079530	3386000	742048	4248720	2177770	9332770	2965800	3466900
dodecanoic acid [Emmi 031418 ASDGR2]	2034120	2042470	854748	2861530	436049	5079420	3215610	13612000	3610590	2410850	1492620	7847100	2918260	601521	0	32422800	0	6462710
1,4:3,6-Dianhydro-.alpha.-d-glucopyrano	0	0	0	0	0	0	0	0	0	0	0	0	0	0	0	0	0	0
cyclohexadecane [Emmi 031418 ASDGR2]	453350	397658	98616	380880	151937	178732	329455	0	100049	465083	563043	109501	0	0	182701	272446	0	0
Triethylene glycol (10151504)	0	0	0	0	0	0	0	0	0	0	0	0	0	0	0	0	0	0
1,2-benzenedicarboxylic acid, mono(2-et	279241	5910160	4289290	2894520	1971450	2317660	17217100	863594	0	3438440	277866	889966	547700	4496890	5647320	6002360	16818800	47457000

## Sheet: Volatile-metabolites-WH
[Header Info Signal 1 COLT 3.0]
030918 ASDWH1.D
2018-03-09 20:31:00
ASDWH1
	0ASDWH1	0ASDWH2	0ASDWH3	0NAC1	0NAC2	0NAC3	1ASDWH1	1ASDWH2	1ASDWH3	1NAC1	1NAC2	1NAC3	3ASDWH1	3ASDWH2	3ASDWH3	3NAC1	3NAC2	3NAC3	7ASDWH1	7ASDWH2	7ASDWH3	7NAC1	7NAC2	7NAC3	15ASDWH1	15ASDWH2	15ASDH3	15NAC1	15NAC2	15NAC3	21ASDWH1	21ASDWH2	21ASDWH3	21NAC1	21NAC2	21NAC3
[Results Signal 1]
Pentane	281904	352055	192698	0	0	0	1344660	357734	895118	0	0	123819	4416880	1783950	3757820	269965	0	0	6276000	4470860	2675720	0	161203	0	5178920	7479650	33115.3	0	0	0	3639490	6378400	6669470	168018	50316	0
carbon dioxide [Emmi 031418 ASDGR-P2]	33173700	51995000	15956300	37121300	42089800	25940600	17237400	23866900	41287900	28677200	27918400	51404600	42351600	37141300	14112700	25237600	29127700	41944100	22234700	16013300	47172700	43364400	41490500	38301100	19006000	55860700	53035600	34422000	23897400	4385620	53415900	36251800	41898700	48293900	26335100	47120100
Ethane, 2-chloro-1,1,1,2-tetrafluoro-	0	0	0	0	0	0	0	0	0	0	0	0	0	0	0	0	0	0	0	0	0	0	0	0	0	0	0	0	0	0	0	0	0	0	0	0
hexane [Emmi 022318 ASDGR-P1]	247175	546740	272410	410949	516337	489348	732315	0	285137	271073	42882.1	257967	3857090	776572	1904180	0	0	210393	4908540	4938010	2066080	0	292828	304518	3586420	5566480	2569010	0	0	86413.3	2843660	6766120	7612860	511054	1037420	598819
Formaldehyde (less than 80 10151504)	0	0	0	36140.6	0	0	0	0	0	0	0	0	0	0	0	0	0	0	0	0	0	0	0	0	0	0	0	0	0	0	0	0	0	0	0	0
Ethyl Chloride	0	0	0	0	0	0	0	0	0	0	0	0	0	0	0	0	0	0	0	0	0	0	0	0	0	0	0	0	0	0	0	0	0	0	0	0
Cyclopropane, propyl-	0	0	87034.1	128993	0	0	0	0	0	0	0	0	0	0	0	0	0	0	0	0	0	0	0	0	103262	0	0	0	0	0	0	0	0	0	0	0
Methanethiol (less than 80 11021517)	0	0	0	0	0	0	0	0	0	0	0	0	545541	0	0	0	0	0	2136200	900374	0	0	0	0	896927	0	0	0	0	0	1925240	1485260	0	0	0	0
n-Hexane	247175	546740	272410	410949	516337	489348	732315	0	285137	271073	42882.1	257967	3857090	776572	1904180	0	0	210393	4908540	4938010	2066080	0	292828	304518	3586420	5566480	2569010	0	0	86413.3	2843660	6766120	7612860	511054	1037420	598819
1-Butene, 2,3-dimethyl-	27228.8	0	0	0	0	0	0	76865.7	189365	0	0	0	191282	0	0	0	0	0	1068740	0	575043	0	0	0	0	0	0	0	0	0	222065	1159770	0	0	0	0
1,3-Butadiene, 2-methyl-	51436.6	705086	0	51707.6	46675.6	0	18432000	3397260	14888600	170476	0	353276	16045600	11950000	14231800	126427	-1	0	17833000	9819190	6404480	-1	180945	142232	9697320	11821600	13393800	40224.3	0	220011	7624650	11606700	10876700	18338.2	123027	0
Propane, 2-methoxy-2-methyl-	0	0	0	0	0	0	0	0	0	0	0	0	0	0	0	0	0	0	0	0	0	0	0	0	0	0	0	0	0	0	0	0	0	0	38196.7	0
Acetaldehyde	62244.5	0	670491	175872	108197	98701.7	0	0	0	112330	1282590	0	0	0	0	50176.6	0	624328	0	0	0	0	331325	123871	0	0	0	26544.1	0	536102	0	0	0	100845	404848	275444
Heptane	0	0	0	0	0	0	0	0	0	0	0	0	0	0	0	0	0	0	3342960	2626950	655496	212018	0	0	1687300	2274360	5607860	0	57264.5	0	828386	2435530	4789170	0	0	0
Propane, 2-ethoxy-2-methyl-	0	0	0	0	0	0	0	0	0	0	0	0	0	0	0	0	0	0	0	0	0	0	0	0	0	0	0	0	0	0	0	0	0	0	0	0
Carbon disulfide	0	0	50060.7	0	0	0	149315	0	0	0	0	0	0	67721.8	0	0	0	146216	0	371115	96942.7	0	0	0	0	0	0	0	24709.5	0	202099	370532	0	0	0	0
Dimethyl sulfide	269062	22286000	160523	0	0	0	222693000	196435000	208040000	3075960	0	26125	232272000	23961400	194086000	59181.4	0	994824	289377000	41894600	202118000	107769	0	3193760	39486000	103692000	3395330	0	32002.5	47886.6	157065000	140990000	119934000	0	200884	4868900
Butane, 1-methoxy-	0	0	0	0	0	0	149434000	0	137960000	0	0	0	197150000	0	185370000	0	0	0	40004400	0	0	0	0	0	0	102653000	0	0	0	0	150592000	0	113670000	0	0	0
Dimethyl sulfide	5230380	25243400	8207240	0	0	0	309418000	259696000	282469000	3357610	480501	7062510	291042000	156951000	214102000	13025300	426418	1103800	253880000	107852000	152229000	2251280	8939890	2201090	265137000	185375000	137623000	10096900	5644050	8356450	86463400	127174000	238274000	5629850	3735170	8499140
(3-ethyl pentane)	0	0	0	0	0	0	0	0	0	0	0	0	0	0	0	0	0	0	0	0	0	0	0	0	0	0	0	0	0	0	0	0	0	0	0	0
borane-methyl sulfide complex [Emmi 022	269062	22286000	160523	0	0	0	222693000	196435000	208040000	3075960	0	26125	232272000	23961400	194086000	59181.4	0	994824	289377000	41894600	202118000	107769	0	3193760	39486000	103692000	3395330	0	32002.5	47886.6	157065000	140990000	119934000	0	200884	4868900
Propanal	0	0	93942.4	0	0	0	0	0	0	0	0	0	0	0	0	0	0	0	0	0	0	0	0	0	0	0	0	0	0	0	0	0	0	0	0	0
Furan	0	0	0	0	0	32608.8	0	0	0	0	40712.5	0	0	0	0	0	0	0	0	0	0	0	0	0	0	0	0	40706.2	0	0	0	226060	0	0	0	0
Hexane, 2,4-dimethyl-	86987	35873.5	0	26999.3	77447.9	-1	192297	0	211870	0	21821.9	0	1474800	0	2354400	58470.9	71664.9	0	5445930	3567650	0	0	0	0	1717700	2122160	264898	47459.7	203506	0	0	3511590	3976300	0	0	132858
Octane	0	0	0	0	34957.4	-1	0	0	0	-1	0	0	13937500	0	0	0	35382.5	20257.4	31464100	31324600	0	0	0	0	41766200	10903000	20993400	0	219127	111651	0	33297700	23726000	0	0	63734.2
2,4 Hexadiene [! Emmi 031418 ASDGR2]	0	0	0	0	0	0	284172	0	0	0	0	0	291515	2348650	0	0	0	0	180950	312368	1860590	0	0	0	351657	1741660	303711	0	0	0	0	0	0	0	0	0
2-Methylpropanal	1231610	685273	654720	0	47773.3	0	0	0	0	0	0	0	0	0	0	0	0	0	0	0	0	0	0	0	0	0	0	111402	0	0	0	0	0	84636.1	0	55587.6
Acetone	1078380	1076310	883430	348649	577346	857788	8886190	4770310	8493460	474265	562650	445272	9255040	1120510	14442700	413211	273788	417659	10890100	12982200	3406660	480414	182990	304209	11243200	4592160	6676900	661505	199605	677287	4782150	2714600	4357680	592540	240934	620592
butane, 1-methoxy-3-methyl [Emmi 031418	0	0	0	0	0	0	0	219365	1122390	0	0	0	9338570	855962	0	0	0	86463.5	0	14058800	6593970	469901	10351700	865359	14301600	0	12963400	1761070	0	0	13861200	0	0	981480	931073	0
Ethyl formate	0	0	0	0	0	0	0	0	0	0	0	0	0	0	0	0	0	0	0	0	0	0	0	0	0	0	0	0	0	0	0	0	0	0	0	0
Methyl acetate	0	0	0	0	0	0	0	0	0	0	0	0	0	0	0	0	0	0	0	0	0	0	0	0	0	1259320	0	0	0	0	0	0	0	0	0	0
1-Heptene, 3-methyl-	287447	250442	221472	302348	246180	215941	0	254937	0	219181	334327	43161.1	367924	142132	61118.6	298576	299504	220592	3700080	272734	363524	123980	219695	17282.7	87992.3	199059	77594.4	253648	258394	241756	52673.7	102790	312073	174510	194801	289688
2-Octene, (E)-	0	0	0	0	0	0	0	0	0	0	0	0	0	0	0	0	0	0	368255	0	0	129201	0	58790.8	0	0	0	0	0	298962	0	0	443884	120600	0	0
Tetrahydrofuran (check)	0	0	0	0	0	0	0	0	0	0	0	22098.3	0	0	0	0	0	0	0	0	0	0	0	0	0	0	0	0	0	0	0	0	0	0	0	0
Ketene	0	0	0	0	0	0	0	0	0	0	0	0	0	0	0	0	0	0	0	0	0	0	0	0	0	0	0	0	0	0	0	0	0	0	0	0
Furan, tetrahydro-2,2,5,5-tetramethyl-	0	0	0	0	0	0	0	0	0	0	0	0	0	0	0	0	0	0	0	0	0	0	0	0	0	0	0	0	0	0	0	0	0	0	0	0
2 methyl furan [Emmi 031418 ASDGR2]	62646.7	199176	73326.5	18024.7	48500.1	26948.9	834019	339341	964059	0	0	32130.8	3096910	808118	2611160	45881.6	-1	0	5543420	3286430	1973230	22056.4	0	0	5153500	3776570	5832830	0	46603.5	0	2476030	5642180	6363400	31744.6	62524.4	0
Butanal	23523.7	0	0	0	0	0	0	0	0	0	0	0	0	0	0	0	0	0	0	0	0	0	0	0	0	98833.4	0	0	0	0	60368.7	0	0	0	0	0
Ethyl acetate	131600	127022	121439	97125.5	115366	124396	214966	75271.1	104478	52836.2	91250.7	32166.7	0	64400.4	36981.8	35806.5	37878.5	57847.8	31933.4	169594	102868	57598.2	47737.5	97263.9	130739	454675	2403830	121159	0	127684	231872	0	269173	156546	132384	180068
Furan, 3-methyl-	300225	1695560	567984	0	0	31236.2	36358400	9556440	37057000	104200	0	231115	51812400	13880000	43701000	165291	0	24377.7	55787700	39041700	14580600	0	166368	123771	47255900	33257900	47240400	0	169381	0	26197300	48430300	46310700	126811	264007	120228
Nonane (10151504)	0	0	0	279475	826911	167478	0	0	0	0	101607	0	0	0	1109850	0	110026	260588	0	3541660	0	571014	0	474613	893470	3790840	707182	609626	691435	656178	725363	6402930	1937840	391595	392788	450949
Isopropyl acetate	0	0	0	0	0	0	0	0	0	0	0	0	0	0	0	0	0	0	0	0	0	0	0	0	0	0	0	0	0	0	0	0	63642	0	0	0
Methanol	0	0	0	323940	923822	0	362172	0	0	0	343424	177517	0	0	0	0	249459	302978	0	0	0	0	0	0	0	0	0	0	0	333419	0	0	0	0	238888	479439
2-Butanone	357673	860955	599745	33873.5	180506	107831	10113300	7108790	9876990	79591	75840.2	98721.1	15042200	239753	16632400	68444.9	0	0	8338290	10886100	8355210	0	362641	0	9954480	5353800	3805740	0	0	0	19191900	15538700	9658320	0	118869	0
Sulfur dioxide (less than 80 11021517)	0	0	0	0	0	0	0	0	0	0	0	0	0	0	0	0	0	0	0	0	0	0	0	0	0	0	0	0	0	0	0	0	0	0	0	0
2-Propanol, 2-methyl-	0	0	0	0	95810	0	0	70412	0	0	1651540	0	450362	237649	0	0	0	0	0	0	0	0	0	0	0	0	0	0	0	0	0	0	0	0	343244	0
Methyl propanoate	0	0	0	0	0	0	0	0	0	0	0	0	0	0	0	0	0	0	0	1216420	1186560	0	0	0	0	932560	3635170	0	0	0	599457	0	0	0	0	0
2-Methylbutanal	992841	178080	168129	-1	37272.1	0	0	0	0	-1	0	0	0	0	0	0	0	0	0	0	0	0	0	0	0	0	0	0	0	0	0	0	0	0	0	0
propane [Emmi 030918 ASDWH1]	117704	0	87728.1	-1	0	0	0	0	0	0	0	0	0	0	0	0	0	-1	0	0	0	0	0	0	0	0	0	0	0	0	0	0	0	-1	0	0
Butanal, 3-methyl-	468913	438456	350830	49148.1	28227.9	87795.2	0	45725.8	0	0	18068.2	-1	0	0	448121	0	0	0	0	0	173890	0	0	0	0	533435	0	0	0	0	304900	0	0	0	0	0
Isopropanol	221605	132307	72567.6	271794	80770.5	191071	603400	251916	400831	82469.5	138425	52997.3	3124400	208117	2259430	102836	90849.4	0	4925710	1668050	2006440	-1	126759	86867.8	100776000	5212980	7585850	239165	116584	57857.5	1030920	26297000	14535100	197554	263007	183154
Ethanol	0	2267910	4661420	1702520	4703530	0	0	2379560	0	0	2841930	0	1819620	2715760	1896400	3379730	2694820	4417270	340355	406182	0	881558	0	1531970	851880	4058950	11547100	0	0	0	1177230	945447	2649730	0	13680900	2504300
Benzene	2026700	2794930	1963100	1894190	2550950	2504090	4233110	2402210	3557160	1597840	1977000	1525300	9562230	4832480	8095360	1666170	1538220	1638530	9556120	7558570	5786760	2020630	1741520	2027430	7305530	6322040	7924060	1693720	1676990	1653370	4765510	7382640	6593340	1602630	1813540	1670890
2-ethyl furan [Emmi 031418 ASDGR2]	193379	564691	187293	108406	27911.5	26096.3	1996650	802660	1936640	100401	53621.8	21169.7	3524490	1572040	3411420	45238.4	0	0	7675770	4356660	2651000	41066	0	36968.9	5539710	4661980	5708230	45477.9	30547.4	50461.9	3325600	5170590	4043950	0	48231.6	33056.1
1-methoxy-3-methyl-2-butene [Emmi 03121	0	0	0	0	0	0	0	0	0	0	0	0	0	0	0	0	0	0	0	0	0	0	88818.6	0	0	0	0	0	0	0	0	0	0	0	0	0
(2-amino-3-butenoic acid)	0	0	0	0	0	0	0	0	0	0	0	0	0	0	0	0	0	0	0	0	0	0	0	0	0	0	0	0	0	0	0	0	0	0	0	0
octane, 2,2,6-trimethyl [Emmi 041418 AS	0	0	0	0	0	0	32118.1	49966.9	52348.8	0	52201.4	0	177067	0	0	-1	0	0	0	1775560	56201.3	0	-1	0	0	0	0	0	-1	0	0	-1	210534	0	0	0
Propanoic acid, 1-methylethyl ester (RT	0	0	0	0	0	0	0	0	0	0	0	0	0	0	0	0	0	0	0	0	0	0	0	0	0	0	0	0	0	0	0	0	0	0	0	0
Ethyl propanoate	0	0	0	0	0	0	0	0	0	0	0	0	0	0	0	0	0	0	0	0	0	0	0	0	0	569914	1763450	0	0	0	78102.6	0	0	0	0	0
furan, 2,4-dimethyl [Emmi 031018 ASDWH-	0	0	0	0	0	0	0	0	0	0	0	0	0	0	0	0	0	0	0	0	47717.5	0	0	0	113173	0	160555	156912	0	0	52553.1	103738	92955.8	0	0	0
1,1,3,3,5,5-hexamethyl-2-thia-1,3,5-tri	842392	933220	913377	878023	839163	683110	52758.7	58237.2	50030.6	44417.5	45605.3	146210	70956.4	75894.3	54589	81915.1	117054	82195.7	109056	133092	211566	129190	86500.4	75131.3	103316	200638	249655	258974	61777	84280.6	196930	197352	234287	130879	222257	145488
Ethyl 2-methylpropanoate	0	0	0	0	0	0	0	0	0	0	0	0	0	0	0	0	0	0	0	0	0	0	0	0	0	44852.6	531864	0	0	0	0	0	0	0	0	0
1,6-dimethylhelpta-1,3,5-triene [Emmi 0	124766	906085	81822.1	21426.6	24272.4	26365.9	1560930	260308	1344340	-1	0	31995.9	668952	274332	497414	15249.4	0	0	3064280	446815	612077	13344.2	20592.4	-1	1251210	1465540	1785450	26746.4	-1	19997.8	904478	1589340	1994520	0	0	0
Benzene, (trifluoromethyl)- (11101508)	0	0	0	33280.6	21580.7	22997.5	0	0	0	71976.2	69721.7	90662.7	0	0	0	164440	300671	331627	0	0	0	393704	444536	360086	0	0	0	293597	519466	431515	0	0	0	621958	582426	572478
Propyl acetate	162696	0	0	0	0	0	0	0	0	0	0	0	0	0	0	0	0	0	0	0	0	0	0	0	0	5235340	5486010	0	0	0	1269030	0	0	0	0	0
2-Pentanone	0	177337	0	0	115212	179677	0	396478	362435	0	0	0	1995170	0	2044640	0	0	0	2124440	2347580	897988	0	0	0	1235490	544999	776659	0	0	0	1355130	2517520	783806	64822.5	0	0
Pentanal	952569	0	0	234875	0	0	0	0	0	162333	210522	142633	0	294201	0	172418	72017.1	121250	0	0	0	132233	116985	108404	0	0	0	122707	161423	137675	0	0	0	156066	124953	162391
octane, 2,3,3-trimethyl [Emmi 041418 AS	0	0	0	0	0	0	0	0	0	0	0	58956.7	0	0	0	0	52971.9	0	0	0	0	0	0	0	0	0	0	0	0	85034.7	0	0	0	140216	52147.8	95397.1
3-Buten-2-one, 3-methyl- (10151504)	0	0	0	0	0	0	0	0	0	0	0	0	0	0	0	0	0	0	0	0	0	0	0	0	0	0	0	0	0	0	0	0	0	0	0	0
Methyl butanoate	0	0	0	0	0	0	0	0	0	0	0	0	0	0	0	0	0	0	556082	360381	41112.3	0	0	0	0	402352	-1	0	0	0	337946	0	0	0	22881.7	0
heptane, 2,2,4,6,6-pentamethyl [Emmi 03	0	0	0	0	0	0	306612	174436	305148	240290	154393	43160.9	0	387590	101967	127588	122560	106770	0	0	0	73063.5	0	61383.8	59072.2	2053710	249406	19410.7	35605.5	62549.8	0	76805.5	0	39293.8	-1	54901.2
2,3-Butanedione	0	369781	0	0	175485	177897	1193260	0	0	0	15043	40420.8	0	213705	0	61412.4	68417	0	445091	0	0	-1	0	50650.3	0	0	659052	20270.3	72321.5	90936.5	0	0	0	99806.5	31151.8	13234.8
3-Pentanone, 2-methyl-	32355.4	128161	39664.9	51849.8	0	0	1136180	0	0	0	0	0	1199400	142566	0	0	0	0	518532	1650700	851655	0	161026	0	1233760	1523170	1037300	0	0	0	1035310	2090980	1203730	0	0	65548.6
(Acetonitrile)	204847	196578	353252	330476	0	446156	267134	301225	284326	262579	256746	0	0	341712	159336	297118	0	281129	0	0	0	306513	312908	268150	0	0	0	380495	393233	462146	345117	866062	0	249564	402437	0
(GSV3)	0	0	0	0	0	0	0	0	0	0	0	0	0	0	0	0	0	0	0	0	0	0	0	0	0	0	0	0	0	0	0	0	0	0	0	0
Methyl Isobutyl Ketone (11021517)	0	23563.7	-1	0	49230.7	-1	57679.4	32294.6	100988	0	0	0	246073	0	145317	0	0	0	696412	423334	175222	0	0	0	278410	68433.1	-1	19672.8	0	0	237298	709477	117015	0	0	0
2-Ethylbutanal	0	0	0	0	568207	455349	0	0	0	0	177716	195562	0	0	0	0	0	0	0	0	0	0	0	0	0	0	0	0	0	0	0	0	0	0	0	0
heptane, 2,2,4,6,6-pentamethyl [Emmi 04	0	0	0	0	0	0	306612	174436	305148	240290	154393	43160.9	0	387590	101967	127588	122560	106770	0	0	0	73063.5	0	61383.8	59072.2	2053710	249406	19410.7	35605.5	62549.8	0	76805.5	0	39293.8	-1	54901.2
3-hexene, 1-methoxy-, (Z) [Emmi 031218	0	0	0	0	0	0	0	0	0	0	0	0	0	-1	0	0	0	0	0	0	0	0	101636	24704.4	72388.5	0	0	0	0	0	64641.6	-1	0	-1	0	0
2-Pentanone, 3-methyl- (11101516)	0	0	0	0	0	0	0	0	0	0	0	0	432341	0	126724	0	0	0	529570	756480	0	0	0	0	0	0	154157	0	0	0	199752	163712	342204	0	0	0
Trichloromethane (10151504)	1449970	1633760	1437950	2528120	1987090	2303340	2835780	3064080	4551520	3214810	1649880	811690	800851	8874040	5911480	832354	3928630	1329690	6149450	6999200	5928890	722299	612266	3468350	0	499034	435554	936908	592916	510989	331488	483847	403073	1615960	534618	1706910
Methyl 2-methylbutanoate	0	26161	0	0	0	0	31320.2	0	0	0	0	0	0	0	0	0	0	0	953373	508815	0	0	0	0	0	0	0	0	0	0	0	0	0	0	0	0
octane, 6-ethyl-2-methyl [Emmi 041418 A	0	0	0	0	0	0	356998	296168	355757	334419	264400	326054	437321	363674	0	359659	407824	383885	0	659817	0	296205	301986	372530	439491	284368	629812	139120	192339	245322	241843	573984	205741	58521.2	109218	69999.9
Amylene hydrate	0	0	0	0	20986.6	0	0	0	0	0	0	0	0	0	0	0	0	0	0	0	0	0	0	0	0	0	0	0	0	0	0	0	8478470	0	0	0
Butanoic acid, 3-methyl-, methyl ester	0	0	0	0	0	0	0	0	0	0	0	0	94531.9	0	0	0	0	0	409414	401942	222745	0	0	0	0	0	0	0	0	0	0	0	0	0	28869.1	0
2-Methylpropyl acetate	0	0	0	0	0	0	0	0	0	0	0	0	0	0	0	0	0	0	0	0	0	0	0	0	119932	725363	693417	0	0	0	0	0	1714730	0	0	0
(1-Penten-3-one)	187102	92505.8	134496	0	0	0	0	0	0	0	0	0	137562	0	0	0	0	0	0	0	0	0	0	0	246942	196152	343251	0	0	0	0	345416	105659	0	0	0
a-Pinene	34287.3	32041.1	0	32312.4	55499.4	36854.3	0	0	76783.7	26491.7	109463	0	0	70467.2	0	0	0	31392.8	0	0	100131	27376.2	17773.4	33182.9	0	82185.6	0	0	0	0	90577.3	0	123712	0	51692.2	22339.5
(NVC022)	530203	469750	466155	515521	533720	815223	532037	591042	400941	470985	628488	467998	408586	299527	0	280266	229218	336199	256623	261514	544001	264687	217068	273434	681011	288675	185756	256898	243334	254337	309954	0	304625	299826	282717	270251
2-butanol (+/-) [Emmi 022318 ASDGR3]	-1	22332.8	21324.4	0	0	0	168129	171234	162289	0	0	0	708316	18470.2	834969	-1	0	0	1318420	570026	969379	24426.5	246222	0	7986170	3491430	4430860	262853	42407.7	34819.9	5733600	7594500	8004900	52757.5	58683.6	44387.5
2-Butanol	-1	22332.8	21324.4	0	0	0	168129	171234	162289	0	0	0	708316	18470.2	834969	-1	0	0	1318420	570026	969379	24426.5	246222	0	7986170	3491430	4430860	262853	42407.7	34819.9	5733600	7594500	8004900	52757.5	58683.6	44387.5
Z-1-methoxy-2-hexene [Emmi 031218 ASDHW	0	0	0	0	0	0	0	694241	0	0	0	0	1028410	0	0	0	0	0	0	0	0	0	0	0	0	0	0	0	0	0	0	1390320	0	0	0	0
4,4-dimethyl-2-cyclopenten-1-one [Emmi	0	0	0	0	0	0	134995	0	95406.3	0	0	0	258129	73755.3	293768	0	0	0	610537	206770	150298	0	0	0	605111	564545	631280	0	0	0	374543	441564	379955	0	0	0
Nonane, 2,6-dimethyl-	0	0	0	-1	35738.9	31425.3	0	0	0	0	0	0	205677	1004710	38303.4	0	0	0	572379	0	0	223130	0	0	0	0	508137	115688	150046	429350	804613	1749730	1715730	-1	0	128683
heptane, 5-ethyl-2,2,3-trimethyl [Emmi	0	0	0	0	0	0	277926	496684	0	442259	305451	399022	626507	496894	75982.6	439533	649622	540866	319843	730416	661893	432674	447692	450346	0	109394	196633	134266	229542	310795	150704	206888	260573	96302.4	163557	129096
Ispropyl butyrate (ISTD)	0	0	0	0	0	0	318913	198462	212249	0	0	0	0	25123.3	262208	0	0	0	0	424411	33456.5	0	0	0	0	0	0	0	0	0	448330	0	0	0	0	0
Ethyl butanoate	0	0	0	0	0	0	0	0	0	0	0	0	0	0	0	0	0	0	0	0	0	0	0	0	0	269189	994049	0	0	0	0	0	0	0	0	0
2-butanol (R) [Emmi 031418 ASDGR3]	0	0	0	0	0	0	0	0	0	0	0	0	351949	0	498251	0	0	0	596402	0	0	0	0	0	4473470	0	0	145060	0	0	998106	4053890	8618170	0	0	0
Toluene	449077	539851	471660	560633	1080900	986262	640602	301036	366585	250112	292251	187179	895115	521690	404466	277645	161164	208535	1035660	1525320	1079770	336764	279540	378012	128175	0	0	199717	292857	312768	935091	1901030	1397280	313962	382096	254053
1-Propanol	0	0	0	0	0	0	0	0	0	0	0	0	0	0	0	0	0	0	0	0	0	0	0	0	11634800	42659400	151779000	0	0	0	4654450	7591190	5969100	0	0	0
Methyl thiolacetate (! 11101510)	0	0	0	0	0	0	0	0	0	0	0	0	1595180	0	59197.4	0	0	0	2635740	0	0	0	0	0	0	0	0	0	0	0	2301430	2938.37	0	0	0	0
Propyl propanoate	0	0	0	0	0	0	0	0	0	0	0	0	0	0	0	0	0	0	0	0	0	0	0	0	0	85446.8	0	0	0	0	0	0	0	0	0	0
Disulfide, dimethyl (! 11101510)	176182	243967	0	311545	292140	0	523836	0	0	128814	118176	355246	66473500	638709	79454000	2266260	165557	294770	36078000	37467600	29857200	0	709120	1054330	14710900	12699500	18975100	665816	277121	480068	22888200	22257400	14659200	1500520	1480390	563877
Ethyl 2-methylbutanoate	0	0	0	0	0	0	0	0	0	0	95301.4	0	0	0	33445.4	0	0	0	99785.3	0	0	0	24902.6	0	0	91820.1	0	77505.1	0	0	0	0	0	0	127033	0
(3-Methyl-7-oxo-1,7-dihydro-triazolo(4,	0	0	0	0	0	0	0	0	0	0	0	0	0	0	0	0	0	0	0	0	0	0	0	0	0	0	0	0	0	0	0	0	0	0	0	0
decane, 2,3,6, trimethyl [Emmi 031418 A	-1	21499	0	0	22685	0	528091	486561	506549	478960	367425	477980	667734	695098	517160	422628	447892	503595	741024	821160	673908	320672	219201	336194	697234	838631	769277	24299.5	138504	98235	750594	741715	690310	90767.9	97214.9	0
Butanoic acid, 3-methyl-, ethyl ester (	0	0	0	0	0	0	0	0	0	0	0	0	0	0	0	0	0	0	0	0	0	0	0	0	0	0	330987	0	0	0	0	0	0	0	0	0
1,4-Dioxane	68919.6	47854.8	60905	67531	61869.4	27883	0	0	0	0	-1	0	0	0	0	0	0	0	0	0	0	-1	0	0	0	0	0	48967	59484.3	0	0	0	0	0	109225	0
camphene [Emmi 020218 ASDGR3]	0	0	0	0	40535	33042.9	0	0	0	0	0	0	0	0	0	0	0	0	62591.8	0	0	0	0	0	0	0	0	0	0	0	0	0	0	0	35305.2	0
Disulfide, dimethyl (! 11101510)	176182	243967	0	311545	292140	0	523836	0	0	128814	118176	355246	66473500	638709	79454000	2266260	165557	294770	36078000	37467600	29857200	0	709120	1054330	14710900	12699500	18975100	665816	277121	480068	22888200	22257400	14659200	1500520	1480390	563877
SOILA1	393858	413164	410909	426681	489823	313831	90509.8	85078.6	87234	101131	83228.9	146543	103812	106697	68866.6	116953	123791	99078	114324	109618	140485	152010	120935	147065	112278	162910	139319	173875	121412	125184	124585	137285	138585	179410	167205	141170
3-Hexanone, 4-methyl- (11101510)	0	0	0	0	45875.8	29672.9	0	0	0	0	0	0	244206	0	150221	0	0	0	396155	553261	0	0	0	0	472571	0	457098	0	0	0	0	1181320	934850	0	0	0
SOILA2	142711	179923	166980	195888	153527	146088	0	0	0	0	0	0	0	0	0	0	-1	0	-1	0	0	0	0	0	0	0	0	34031.8	0	-1	0	0	0	-1	28363.6	-1
Butyl acetate	0	0	0	0	0	0	0	0	0	0	0	0	0	0	0	0	0	0	0	0	0	0	0	0	0	0	0	16902.5	0	0	0	0	0	0	0	0
nepthalene, 1-isocyano [Emmi 031418 ASD	0	0	0	0	0	0	62521.9	63789	58114.6	72483.6	42109.2	55960.8	84137.8	63567.9	41264.2	67744.3	68212.7	72629.8	64466.4	82125.1	48590.3	89910.2	78016.5	80010	57319.9	86476.3	66297.8	54159.8	69810.7	80813	90879.6	70400.4	69856.1	78697.9	62494.3	49094.6
decane, 3,7-dimethyl [Emmi 042018 ASDRB	0	-1	0	0	0	0	-1	157587	223319	240794	0	0	27998	46691.5	0	201266	0	-1	215208	224849	184101	-1	-1	0	225460	357288	184560	0	0	25769.5	345708	272256	245791	-1	0	0
2-Hexanone	0	0	0	0	0	0	902301	0	0	0	0	0	949537	0	0	0	0	0	0	0	0	0	0	0	0	0	0	0	0	0	0	0	0	0	0	0
Hexanal	611460	401009	531181	461031	484753	404119	392172	280256	304426	332264	413946	270610	336885	285556	648491	207881	165405	301626	0	0	168550	238676	205586	134303	0	0	0	271952	310340	311996	604117	0	-1	274694	253008	301044
Undecane (10151504)	18160.3	40963.8	28686.1	-1	20880.5	-1	20662.3	0	-1	0	-1	0	-1	-1	14747	-1	0	0	128619	55597.6	85144.7	104523	91548.8	70733.6	181049	30359.3	147042	22538.6	69053	196263	145087	155664	0	99903.7	131460	171026
2-Butenoic acid, methyl ester, (E)- (11	0	0	0	0	0	0	36859.2	0	0	0	0	0	365446	0	383369	0	0	0	205684	104444	0	0	0	0	0	0	0	43845.4	0	0	0	0	0	0	0	0
2-Methyl-1-propanol	74743.5	90999.4	96386.2	46774.4	43459.5	-1	462449	916406	631098	-1	0	-1	2739100	0	3265580	-1	0	0	5241020	4659510	312081	52893.1	86548.9	48253	8209940	28832700	41649600	66112.3	337705	95494.6	4391900	21888600	40331200	31245.4	191496	79279.4
B-pinene [Emmi 020318 NAC-P2]	0	32314.1	39464.7	22662.7	17616.7	30801.1	53765.4	42808.1	39895.2	35128.1	56651.9	18857.2	55605	66720.3	46628.4	17646.1	19569	22582.4	71811.6	71515.8	86421.6	21317.7	0	25176.9	0	50243.8	64117.3	17503.8	20927.5	20087.8	61380.4	81881.5	67557.8	19723.2	72063.5	0
(GSVA1) (3-Ethyl-2-methyl-1-pentene)	0	0	39821.4	0	0	-1	0	-1	-1	0	0	0	0	0	0	0	0	0	0	0	0	0	0	0	0	0	0	0	0	0	0	0	0	0	0	0
(3-Pentanol)	0	0	0	0	0	0	93437.6	65832.3	123475	0	0	0	976723	281080	2142940	18342.9	0	0	5867130	2273790	2180450	34746.3	162433	34280.7	7442680	5740220	11753100	66194.3	118905	79928.3	4391330	10037600	14258800	217681	122871	13164.5
Butanoic acid, 1-methylpropyl ester (11	0	0	0	0	0	0	0	0	0	0	0	0	0	0	0	0	0	0	0	0	0	0	0	0	0	0	0	0	0	0	0	0	0	0	0	0
2-Methylbutyl acetate (HCV2)	0	0	0	0	0	61718.2	0	0	0	0	0	0	62055.2	0	0	0	0	0	98208.5	0	23440	0	0	0	0	2842120	0	0	28576.8	0	211872	171228	160786	36682.5	-1	42823
Ethylbenzene	160662	198365	191238	294050	389014	473965	160957	0	0	136419	155422	193973	151144	139035	184061	94733	96707.8	104416	325819	569138	231601	158952	123858	153390	289683	0	0	0	117175	0	215211	289551	273084	121944	131729	101651
Propyl butanoate	0	0	0	0	0	0	0	0	0	0	0	0	0	0	0	0	0	0	0	0	0	0	0	0	0	169438	418931	0	0	0	0	0	0	0	0	0
(R)-(-)-2-Pentanol	0	0	0	0	0	0	0	356574	180627	0	0	0	1451990	0	1601030	0	0	0	6632540	3969950	3224150	0	0	0	18075500	13945500	17225600	213578	0	127932	9580220	25616300	24424600	239240	0	415514
2-butanol, 3-methyl-, (S)- [Emmi 031418	0	0	0	0	0	0	0	0	0	0	0	0	144688	-1	0	0	0	0	475266	0	0	0	0	0	0	0	0	0	0	-1	0	0	0	26964	32287.3	-1
p-xylene [Emmi 020318 ASDGR1]	213311	285025	263369	331251	425851	468130	210281	54240.5	177478	101739	173659	169588	294279	205951	315193	172193	91170.3	121841	536787	431443	356475	197891	79492.6	119641	344355	116078	367230	190012	161160	205117	380573	423614	376381	168491	81878.2	139450
GSV40	0	0	0	0	0	0	0	0	0	0	0	0	0	0	0	0	0	0	0	0	0	0	0	0	0	874308	0	0	0	0	0	0	0	0	0	0
(3-Hexen-2-one)(NVC004)	65748.5	39777.9	-1	34200.5	39399.4	67373	37161	14122	18421.2	0	30774.2	0	46519.2	0	48315.4	0	0	0	73738.1	48194.2	25432.2	32267.3	0	0	79446.9	48036.2	70896	41657.3	0	74602.1	0	37464.7	20590.1	68190	0	40525
(E)-2-Pentenal	-1	0	-1	0	0	0	0	0	0	0	0	0	0	0	0	0	0	0	0	0	0	0	0	0	0	0	0	0	0	0	0	0	0	0	0	0
Ethyl pentanoate	0	0	0	0	0	0	0	0	0	0	0	0	0	0	0	0	0	0	0	0	0	0	0	0	0	0	0	0	0	0	0	0	0	0	0	0
(Z)-3-Hexenal	0	0	0	0	0	0	0	0	0	0	0	0	0	0	0	0	0	0	726469	29239.8	131205	0	0	125409	0	0	0	0	0	0	238390	0	0	0	-1	0
Propyl 2-methylbutanoate	0	0	0	0	0	0	0	0	0	0	0	0	0	0	0	0	0	0	0	0	0	0	0	0	0	-1	24942.4	0	0	0	0	0	0	0	0	0
Butyl propanoate	0	0	0	0	0	0	0	0	0	0	0	0	0	0	0	0	0	0	0	0	0	0	0	0	36821.5	122200	78691.5	0	0	0	0	-1	0	-1	0	0
3-Pentanol, 2-methyl- (11101510)	0	0	0	0	0	0	0	0	0	0	0	0	180954	96914.2	180557	0	0	0	133642	100606	242076	0	0	0	289926	325461	567165	0	0	0	286450	681657	718244	0	0	0
Methane, nitro-	0	0	0	0	0	0	0	0	59163.5	0	0	0	0	0	2318090	0	0	0	179304	360732	0	0	0	0	0	0	0	0	0	0	0	0	0	0	0	0
1-Butanol	0	0	-1	0	64974	99513.1	0	0	0	0	0	0	210115	0	322081	0	0	0	493319	129658	288348	0	102343	61775.7	6229670	12700300	43800700	0	318928	756396	3894370	4111370	4173280	227003	191796	133700
(2-Methylpropyl butanoate)(NVC015)	0	0	0	0	0	0	0	0	0	0	0	0	0	0	0	0	0	0	0	0	0	0	0	0	0	0	0	0	0	0	0	0	0	0	0	0
3-Heptanone	17371.4	27867.8	-1	35748.7	138314	106470	18738.9	-1	19271.3	0	0	0	42314.2	0	31239.6	0	0	0	63123.5	52157.3	-1	0	0	0	32306.4	22041.6	0	-1	0	0	25912.3	32812.1	-1	0	0	0
Acetic acid, 1-methylcyclopentyl ester	52100.9	50389	65909.6	58388.8	80276.1	55362.7	110988	58097.4	36855.8	51603.4	59594.8	46086	59027	46392.6	55373.9	39268.7	38260.4	44824.7	102312	76153.9	72979.3	64862.7	35876.8	41133	159264	104966	67586.3	65570.9	97979.1	201104	120965	197217	0	111712	100430	161649
(1-Penten-3-ol)(NVC016)	1212990	1791290	1581540	60560.6	98958.7	23234.5	2933640	3129800	3185780	39371.7	0	0	1074490	291777	1087650	23899.7	0	0	265136	267323	456295	0	58304.4	39382.6	203019	158300	143474	27866.2	-1	0	83632.5	148378	260565	18026.5	98156.7	23410.8
(2-butenenitrile)	0	0	0	0	0	0	0	0	0	0	0	0	0	0	0	0	0	0	0	0	0	0	0	0	0	0	0	0	0	0	0	0	0	0	0	0
a-Myrcene	0	0	0	0	0	0	0	0	0	0	20135.2	0	0	0	0	0	0	0	0	0	0	0	0	0	0	0	0	-1	0	0	0	81323.8	0	0	152505	0
2-Butenoic acid, 1-methylethyl ester (!	0	0	0	0	0	0	0	25888.8	0	0	0	0	0	0	0	0	0	0	0	0	0	0	0	0	0	0	0	0	0	0	30177.8	0	548377	0	0	0
(2-Propen-1-amine)(NVC017)	50278.5	56770.6	0	0	0	0	209330	589845	277086	0	0	0	223343	0	0	0	0	0	0	0	0	0	0	0	2136400	4615360	4667610	0	0	0	0	0	0	0	0	0
Ethyl (E)-2-butenoate	0	0	0	0	0	0	0	0	0	0	0	0	0	0	0	0	0	0	0	0	0	0	0	0	0	0	62647.2	0	0	0	0	0	0	0	0	0
thiophene, 3-ethyl [Emmi 031218 ASDWH1]	0	0	0	0	0	0	43775.8	0	-1	0	0	0	175776	72535.9	131955	0	0	0	340412	427890	215735	0	0	0	290507	356048	357043	0	0	17219	245985	339270	277328	0	0	0
(isopropylisothiocyanite)	0	0	0	0	0	0	0	0	0	0	0	0	0	0	0	0	0	0	0	0	0	0	0	0	0	0	0	0	0	0	0	0	0	0	0	0
Pentyl acetate	0	0	0	0	0	0	0	0	0	0	0	0	0	0	0	0	0	0	0	0	0	0	0	0	0	0	0	0	0	0	0	0	0	0	0	0
Heptanal (11101508)	411918	333762	320456	597942	311883	247343	266463	326128	432602	199816	337993	243582	314992	343832	579399	363445	226909	343161	278991	319629	365345	307255	291644	240888	309852	405276	272946	390902	308658	303549	431532	427951	356633	327996	394237	377126
Pyridine (11101508)	0	0	29421.4	0	0	0	0	0	0	0	0	0	0	0	0	0	0	0	0	0	0	0	0	0	0	0	51456.7	0	0	0	147951	0	107703	0	59951.6	0
a-Terpinene	-1	58836.1	0	0	0	0	67270.6	0	52533	0	0	0	18921.2	47585.1	122886	0	0	0	212938	18211.4	0	0	0	0	225269	176612	173247	0	0	0	179734	367066	334050	18066.7	0	0
(2,4-pentadienenitrile)	431393	440252	379743	402737	429577	371291	379487	356333	394091	297579	450220	425420	522344	398839	321574	410479	379169	371206	652599	551930	681599	370324	312079	396116	698936	541439	468707	420189	353668	792473	652784	642383	577891	730311	430169	1081670
o-xylene [Emmi 030918 NAC3]	148765	176058	154788	254970	322812	371293	0	0	0	115942	144718	219072	43779.1	130565	0	83373.1	88986.1	87265.9	308268	0	0	121067	108615	127628	0	0	167996	98027.7	106616	107666	0	0	0	100073	105292	87502
(Ketene/hydrogen azide)	895122	0	0	0	0	0	319210	491172	0	0	1017970	625637	0	0	1531930	0	0	0	0	0	1243710	977516	691933	785580	1857680	1161380	1282200	1183640	940095	1274980	2157270	1411460	1133510	1304180	0	1273700
2-Heptanone	0	0	0	0	21505.7	14236.6	846421	389856	822921	0	0	0	948202	0	821760	0	0	0	1102690	1716640	876110	0	0	0	702919	814367	0	0	0	0	1730630	1569860	758862	0	0	0
Cyclotrisiloxane, 2,4,6-triethenyl-2,4,	-1	0	0	0	0	0	0	0	0	0	0	0	0	0	0	0	0	0	0	0	0	0	0	0	0	0	0	0	0	0	0	0	0	0	0	0
Propanoic acid, 2-methyl-, 3-methylbuty	0	0	0	0	0	0	0	0	0	0	0	0	83415.4	0	97701.1	11220.7	0	0	0	0	0	0	0	0	0	-1	3277050	0	0	0	0	0	0	0	0	0
hexenal, 2-methyl [Emmi 021718 ASDGR2]	105514	299688	222671	227677	851305	562104	50824.5	43097.8	73795.7	26611.2	0	0	0	195465	0	91109.8	90145.4	100199	99199	128120	746086	152112	101875	217392	-1	399253	167750	176471	112244	91388.6	1871390	228053	178158	199581	108044	98562
Dodecane (10151504)	30196.3	46197.6	33477.4	31387.4	44562	11581.5	26238.8	22004.4	33917.4	-1	21154.6	0	275347	0	0	0	0	0	293007	302842	218089	169781	-1	-1	305053	251634	320092	0	-1	19080.9	255667	398255	366373	182950	2885240	207527
Heptanal	411918	333762	320456	597942	311883	247343	266463	326128	432602	199816	337993	243582	314992	343832	579399	363445	226909	343161	278991	319629	365345	307255	291644	240888	309852	405276	272946	390902	308658	303549	431532	427951	356633	327996	394237	377126
1,3-Diisopropoxy-1,3-dimethyl-1,3-disil	0	0	0	0	0	0	0	0	0	0	0	0	0	0	0	0	50307.6	56876.4	0	0	0	45749.8	0	0	89304.6	63352.8	0	0	0	0	0	0	72350.9	50022.6	0	0
Methyl hexanoate	0	0	0	0	0	0	0	0	0	0	0	0	0	0	0	0	0	0	0	0	0	0	0	0	0	0	0	0	0	0	0	0	0	0	0	0
limonene? (10151504)	132087	145068	163776	345618	197906	140226	140666	122097	131384	91321.4	400386	116619	194082	199603	279211	124645	125278	111913	301674	262492	334253	167825	184114	211777	258632	313523	257652	255526	230508	194593	279401	344390	312566	178097	2994960	211395
2-Methylbutyl propanoate	0	0	0	0	0	0	0	0	0	0	0	0	0	0	0	0	0	0	0	0	0	0	0	0	0	0	0	0	0	0	0	0	0	0	0	0
(2-Hexenal)(NVC019)	0	0	0	26340.7	-1	-1	0	0	0	0	0	0	0	0	0	0	0	0	0	0	0	0	0	0	0	0	0	0	0	0	0	0	0	0	0	0
(Dimethyl peroxide) (NVC006)	0	0	0	0	0	0	0	0	0	0	0	0	0	0	0	0	0	0	0	0	0	0	0	0	0	0	0	0	0	0	0	0	0	0	0	0
benzene, propyl [Emmi 041418 ASDRB2]	0	0	0	-1	23299.9	22944.6	0	0	0	0	0	-1	0	-1	0	0	-1	-1	23738.4	0	0	-1	0	0	0	0	0	0	0	0	0	0	0	0	0	0
2-Methyl-1-butanol	164622	185576	185289	0	0	0	604383	1241760	834246	0	0	0	811362	-1	1073930	0	0	0	1049610	697504	953449	0	125271	78830.6	7456010	15264300	16703400	494808	316295	291776	9053020	6820580	11711700	483969	298095	206536
3-Methyl-1-butanol	195565	203660	264871	0	0	0	1121270	2322780	1737280	75309.4	0	0	1829810	0	2269000	58063.9	45667.2	40086.1	544441	271997	842079	0	169584	0	4791430	8998620	15287000	469064	170733	351708	4443030	3256670	5656200	323823	176361	0
(o-Methoxy-benzoyl)-tris(trimethylsilyl	12620.7	-1	-1	12004.8	29923.9	-1	-1	-1	-1	-1	-1	-1	-1	11886	-1	-1	-1	-1	-1	-1	-1	14447.2	26041.7	12226.4	0	0	0	-1	12457.2	13919.8	0	0	0	14738.5	14833.1	-1
2-Hexenal, (E)-	0	0	0	-1	0	0	0	0	0	0	0	0	0	0	0	0	0	0	0	0	0	0	0	0	0	0	-1	0	0	0	0	0	0	0	0	0
(isothiocyanatocyclopropane)	0	0	0	0	0	0	0	0	0	0	0	0	0	0	0	0	0	0	0	0	0	0	0	0	0	0	0	0	0	0	0	0	0	0	0	0
4-Octanone (10151504)	0	0	0	0	-1	0	0	0	0	0	0	0	0	-1	0	0	0	-1	25250.4	27963.6	0	0	0	0	0	-1	32400.5	23903	0	0	23371.3	-1	-1	0	0	0
2-Hexanol	0	0	0	0	0	0	0	0	0	0	0	0	0	0	0	0	0	0	391287	279040	125117	0	0	0	1138970	1358640	1268380	0	0	36992.5	1692050	2574070	4272820	0	0	0
benzene, 1-ethyl-2-methyl [Emmi 020318	56702	70242.5	75467.8	116454	258245	253852	-1	40649.3	57161.1	87467.9	58984.8	81115.2	82314.5	98756.3	92017.8	50158.1	57186.2	61216.2	171074	117685	134650	79184	50736	84473.6	67351.2	142241	103555	88722.5	75805.5	67125.6	77959.5	132831	112888	70929.6	55405.7	58075.6
Butyl butanoate	0	0	0	0	0	0	0	0	0	0	0	0	0	0	0	0	0	0	0	0	-1	0	0	0	-1	75413.5	79346.4	-1	-1	0	27632.6	26141.4	0	10258.3	-1	-1
(isooctanol)	350770	121728	177041	61680.4	0	0	-1	-1	28363.6	19071.4	101149	23230.2	14921.8	20531.3	26175.4	-1	0	-1	37664.8	33969.4	73641.4	0	0	-1	80802	0	0	0	33499.2	29848.6	-1	58267.4	13935.3	20058.2	178898	23758.6
1-Butanol, 3-methyl-, nitrate	0	0	0	0	0	0	0	0	0	0	0	0	0	0	0	0	0	0	0	0	0	0	0	0	0	0	0	0	0	0	0	0	0	0	0	0
Furan, 2-pentyl-	48120.2	82766.9	-1	47164.2	69041.1	56722.2	174502	139336	165411	71569.7	59972.6	66121.4	315277	60125.5	422819	53578.6	35434.6	34828.1	986074	484221	162779	53936.4	54877.2	61382	603043	549511	748049	108699	-1	109724	304695	500717	544406	70724.5	106651	79630.3
Decane, 3-ethyl-3-methyl-	37966.3	30868.3	0	0	0	0	0	0	0	0	0	0	0	-1	0	-1	-1	-1	0	0	0	0	0	0	0	0	0	37739.5	0	0	0	0	0	0	0	0
Butyl 2-methylbutanoate	0	0	0	0	0	0	0	0	0	0	0	0	0	0	0	0	0	0	0	0	0	0	0	0	-1	-1	-1	0	0	0	-1	-1	-1	-1	18648	-1
2-heptanone, 6-methyl [Emmi 031418 ASDG	65908.1	74370.8	62628.7	30641.5	168870	152146	143238	109897	140147	-1	94173.5	52760.4	291606	69106.8	429732	92272.3	31624.3	36597.1	379075	489695	362458	-1	53928.3	45491	257307	301787	145140	50337.8	51329	37017.1	282882	287802	199975	42906.8	58679	65767
Ethyl hexanoate	0	0	0	0	0	0	0	0	0	0	0	0	0	0	0	0	0	0	0	0	0	0	0	0	0	0	0	0	0	0	0	0	0	0	0	0
3,5 dimethyl-4-octanone [Emmi 031418 AS	35703.4	0	22328.9	0	0	0	30114.3	0	-1	0	0	0	47463.1	-1	49854	-1	0	0	34835.7	46225.2	25858.6	-1	0	0	81427.3	0	117088	0	-1	25878.7	65812.3	54116.2	60327.1	0	0	-1
Ethyl tiglate	0	0	0	0	0	0	0	0	0	0	0	0	0	0	0	0	0	0	0	0	0	0	0	0	0	0	0	0	0	0	0	0	0	0	0	0
Octane, 1-chloro- (101515504)	42814.8	43029.1	0	31920.3	27902.4	0	-1	0	33964.7	31373.5	-1	34111.9	56641.2	74805.5	54388.9	-1	44291.5	55035.5	0	-1	110100	-1	41436.2	47737.5	128476	398217	195455	142279	316616	443046	125022	237135	222599	111352	149243	196460
Pentyl propanoate (HCV13)	0	0	0	0	0	0	0	0	0	0	0	0	0	0	0	0	0	0	0	0	0	0	0	0	0	0	0	0	0	0	0	0	0	0	0	0
SOILA5	-1	-1	-1	-1	-1	12903.7	0	0	-1	-1	0	0	0	0	0	0	-1	-1	0	-1	-1	0	0	-1	0	-1	-1	0	-1	-1	0	-1	0	-1	-1	-1
1-Pentanol	146948	65343.4	107406	-1	30332.6	26164.3	111004	290553	133716	28483.4	31150.6	25237	110967	0	160452	0	0	-1	0	23454.5	66544.4	-1	-1	-1	446061	1062370	2822530	0	92946	178073	526317	260482	1013960	0	-1	48988.5
3-Octanone	0	0	0	0	0	0	751785	509336	735827	0	0	151971	1112000	0	1228010	0	0	0	1639500	1381120	1355760	0	0	0	0	600933	326337	0	0	0	525370	627020	454158	0	0	0
Prenyl acetate	0	0	0	0	0	0	235734	184402	150147	0	0	0	155089	72296.3	251528	0	0	0	83727.8	0	62756.4	0	0	0	234891	197602	266169	0	0	0	187753	144006	221011	29835.1	0	0
1,3,5,7-Cyclooctatetraene	195841	208797	169729	229207	402588	325660	0	0	0	208503	194905	0	0	213009	0	151756	172628	182347	470450	734258	0	176838	184139	192793	760646	493175	608042	388303	242198	343217	352534	820084	661297	264518	283742	273620
(1-isocyano-3-methyl-benzene)	0	0	0	0	0	0	0	0	0	0	0	0	0	0	0	0	0	0	0	0	0	0	0	0	0	0	0	0	0	0	0	0	0	0	0	0
(isothiocyanatobutane)	0	0	0	0	0	0	0	0	0	0	0	0	0	0	0	0	0	0	0	0	0	0	0	0	0	0	0	0	0	0	0	0	0	0	0	0
Acetic acid, ethoxyhydroxy-, ethyl este	0	0	0	0	0	0	0	0	0	0	0	0	0	0	0	0	0	0	0	0	0	0	0	0	0	0	0	0	0	0	0	0	0	0	0	0
thiocyanic acid, methyl ester [Emmi 031	-1	93996.8	0	0	0	0	-1	0	0	0	0	0	28975.8	73095.3	40665.7	22247.4	0	60752.2	23468.4	25270.7	23389	0	0	-1	0	0	22752.2	-1	0	0	0	20843.5	-1	0	-1	-1
Acetic acid, mercapto-	0	0	0	0	0	0	0	0	0	0	0	0	-1	0	56045.5	0	0	0	27163.9	30954	24432.2	0	0	0	-1	0	0	0	0	0	-1	0	0	0	0	0
2-methylbutyl butanoate	0	0	0	0	0	0	0	0	0	0	0	0	16925.8	0	74919.6	-1	0	0	0	0	75922.6	0	0	18253.2	0	32510.1	-1	0	0	0	-1	-1	0	0	0	0
(NVC027)(GSV5)	0	0	0	0	0	0	0	0	0	0	0	0	0	0	0	0	0	0	0	0	0	0	0	0	0	0	0	0	0	0	0	0	0	0	0	0
butanoic acid, 2-methyl, 3-methylbutyl	0	0	0	0	0	0	0	0	0	0	0	0	121158	17471.9	140806	23938.1	0	0	57644.2	39218.5	41129.6	0	0	0	51446	116264	96585.5	0	-1	17894	94741.9	82783.6	86471.3	0	0	0
Hexyl acetate (HCV30)	0	-1	0	27635.8	-1	0	0	0	-1	0	0	0	0	-1	0	0	-1	0	15412.3	-1	17534.2	-1	25121.7	-1	26671.7	30769.2	-1	46117.8	29552.9	18961	52864.6	59727.4	55384.6	66892.6	42927.1	56449.7
benzene, 1,3,5-trimethyl [Emmi 020218 A	101659	144579	114763	203888	331977	308078	81295.2	68417	85967.7	113706	91666.1	150588	96104.4	96143.3	105986	54543	73205.9	65635.9	217521	160909	150683	73906	69918.2	84622.7	121337	177952	148678	106700	106108	71860.9	118023	158023	152492	71930.9	66750.4	66639.9
(NVC028)(GSV6)	0	0	0	0	0	0	0	0	0	0	0	0	0	0	0	0	0	0	0	0	0	0	0	0	0	0	0	0	0	0	0	0	0	0	0	0
Cyclohexane, isocyanato- (10151504)	0	0	0	0	0	0	0	0	0	0	0	0	0	0	0	0	0	0	0	0	0	0	0	0	0	0	0	0	0	0	0	0	0	0	0	0
2-Methylbutyl 2-methylbutanoate	0	0	0	0	0	0	0	0	0	0	0	0	114959	17206.6	148529	-1	0	0	26223.1	0	0	0	0	-1	0	33779.8	0	-1	-1	0	0	0	0	0	-1	0
2,4-dithiapentane [Emmi 031418 ASDGR2]	0	0	0	0	0	0	78412.3	0	0	0	0	0	440105	363283	428867	0	0	0	365113	373391	437651	0	0	0	244867	459809	311243	0	0	0	303507	269996	233809	0	0	0
2-Octanone	87727.9	0	0	84057.9	88573.7	56976.7	0	0	0	79707.2	161730	0	330983	0	497425	0	76308.6	70264.5	175233	437942	156616	0	98361.9	95214.3	210094	349322	139092	0	94661.6	168328	613931	652319	0	0	0	87884.5
Acetoin	214302	407491	334864	0	0	0	8940970	1612200	2853420	146448	0	554593	854468	0	477470	0	0	0	0	0	0	0	94398.8	122494	0	0	0	0	0	84979.6	0	454773	549149	0	0	0
Cyclohexanone (10151504)	-1	40173.8	0	16632	27332.4	29266.8	30881	37721	32797	0	-1	-1	33200.2	45348.2	22872.8	0	0	0	0	0	0	0	0	-1	0	0	0	0	0	0	0	0	28373.5	14338.8	0	0
Octanal	430852	412168	379925	460448	401717	336284	425169	353407	342723	307537	384453	360700	439540	426355	399493	319269	347109	366252	452980	488366	528578	487035	369284	369014	532568	869159	601593	820799	721511	645278	483286	800054	787468	572310	614393	781546
(1-Hepten-3-one)(NVC023)	46487.3	68748.7	35434.6	33168.2	29616.7	42309.1	47233.2	35075	30021	47811.2	0	42000.6	79262.4	0	74021.6	49266.8	42419.4	53388.7	84077.3	62361.9	95861.9	47856.5	45869	55881.8	103929	166016	95523.6	60258.2	85582.4	54497.8	115996	100679	104891	67302.5	0	87934.6
2-Propanone, 1-hydroxy-	223591	272467	180397	210573	433652	371141	140090	168843	203979	153636	359278	162792	338717	544184	458445	576299	595436	333381	200710	233366	174073	176704	171363	186119	243126	120921	329283	285444	241392	222055	511604	246231	292646	204058	402090	306662
Acetaldehyde, hydroxy- (11101510)	220147	430734	183397	191724	540432	282778	0	158641	189378	204953	350777	138600	196441	562701	181374	596931	636527	209009	0	0	0	147980	0	0	0	0	0	172670	239266	0	391349	0	449644	187407	222637	300854
Arsenous acid, tris(trimethylsilyl) est	76147.7	81458.2	71475.6	76659.7	115557	95041	63016.8	78696.2	66607	89297	96183.4	76013.3	64631.3	65740.1	68066.9	74259.4	80137.7	73390.8	71964.7	74699.5	93964.1	67902.2	78877.7	79432.1	86137	0	89774.2	72690.2	67277.3	70593.6	83306.2	89843	91266	65074.7	73978.8	75831.8
(Pentyl butanoate)(NVC019)	0	0	0	0	0	0	0	0	0	0	0	0	0	0	0	0	0	0	0	0	0	0	0	0	0	0	0	0	0	0	0	0	0	0	0	0
2-Heptanol	0	0	0	0	0	0	0	0	0	0	0	0	143185	0	208952	0	0	0	617172	246690	323753	0	0	0	1911090	2777490	2404070	212518	275505	211559	4326370	4084200	4286620	258880	166108	435923
cyclohexanone, 2,2,6-trimethyl- [Emmi 0	24768.2	78142.1	21119.8	19532.2	34561	32380.3	89668.3	76410.1	17072.1	24756.5	0	23229.4	266196	52576.3	320737	40691.3	0	19872.2	449986	435490	232261	57239.8	66943.1	60379.2	278345	245272	443758	55764.2	45065.9	50040.6	252989	414024	404184	63488.9	0	48173
2-Isopropyl-5-methyl-1-heptanol	-1	-1	-1	23257.9	-1	24106.3	-1	-1	-1	-1	-1	-1	0	21969.4	27718.3	-1	-1	20919.4	33805	35406.9	36323.3	-1	-1	22444.8	31306.8	0	0	36056.2	-1	-1	0	0	0	41810.2	-1	30609
2-Penten-1-ol, (Z)-	59744.2	75497.5	73972.1	0	0	0	143173	370371	159660	54344.6	0	0	138844	0	0	0	0	0	0	0	0	0	0	0	0	0	0	131458	0	0	0	0	101571	0	0	0
Propyl hexanoate	0	0	0	0	0	0	0	0	0	0	0	0	0	0	0	0	0	0	0	0	0	0	0	0	0	0	0	0	0	0	0	0	0	0	0	0
a-Methylstyrene (10151504)	56288.4	39624.5	31995.6	-1	48261.4	46809.8	24035.8	27575.5	53719.7	41414.4	48679.7	34456.8	0	47814.5	63653.5	40548.5	33507.6	32471	0	28973.3	33265.5	27778.8	22697.9	26513.6	31090.9	27202.6	31207.7	31878.6	30339.1	27778.8	27484.8	31916.6	30597.8	28445.8	26666.6	24459.1
6-octen-2-one [Emmi 031418 ASDGR2]	0	-1	0	0	0	0	441590	326233	456327	87277.6	0	127695	742481	48987.1	887326	119511	0	0	498192	970833	593633	96647.5	0	0	334280	251613	82177.2	0	0	0	457087	465451	215232	0	0	62401.9
2-Heptenal, (E)-	24126.5	0	16063.1	0	27205.9	0	0	-1	0	-1	0	0	0	0	0	0	0	0	107690	0	35348.9	0	0	-1	0	0	0	0	0	0	0	0	500820	0	-1	0
Pentyl 2-methylbutanoate (GSV17)	0	0	0	0	0	0	0	0	0	0	0	0	0	0	0	0	0	0	0	0	0	0	0	0	0	0	0	0	0	0	0	0	0	0	0	0
(E)-2-Hexenyl acetate	0	0	0	0	0	0	0	0	0	0	0	0	0	0	0	0	0	0	0	0	0	0	0	0	0	0	0	0	0	0	0	0	0	0	0	0
2-hexanol, 3-methyl [Emmi 031418 ASDGR3	0	0	0	0	0	0	0	0	0	0	0	0	-1	0	-1	0	0	0	0	-1	25505.8	0	0	0	65197.4	236336	152470	0	-1	0	88934.2	141139	179736	0	0	-1
6-Methyl-5-hepten-2-one,	383132	392720	347666	363791	445665	306144	252711	235813	271496	190515	280390	180750	271770	215737	366625	198937	277575	152290	577478	540846	424402	267579	132807	259489	851716	1000430	846671	779999	488754	708550	890024	883243	816776	746472	712401	825537
Hexyl propanoate	0	0	0	0	0	0	0	0	0	0	0	0	0	0	0	0	0	0	0	0	0	0	0	0	0	0	0	0	0	0	0	0	0	0	0	0
Z-2-dodecenol [Emmi 030918 ASDWH1]	33791.5	24264.2	22233.1	24516.2	16069.8	23675.9	27666	-1	-1	16460.8	-1	-1	-1	-1	-1	-1	-1	-1	26307.9	27276.5	28808.6	37837	21073.9	27918.2	47520.5	53521.4	41932.9	58089.4	50971.2	57536.6	39601	43213	48817.4	55920.1	42073.9	63336
Hexyl 2-methylpropanoate	0	0	0	0	0	0	0	0	0	0	0	0	0	0	0	0	0	0	0	0	0	0	0	0	0	0	0	0	0	0	0	0	0	0	0	0
(AITC2)	0	0	0	0	0	0	0	0	0	0	0	0	0	0	0	0	0	0	0	0	0	0	0	0	0	0	0	0	0	0	0	0	0	0	0	0
Anisole	0	0	0	0	0	0	0	0	0	0	0	0	32595.4	0	0	0	0	0	296666	492709	37267.4	172845	1496150	47890.1	180652	133926	486605	721489	54628.6	129503	83585	550239	305629	68844	75564.7	53741.5
2-Butenoic acid, butyl ester (11101510)	0	0	0	0	0	0	0	0	0	0	0	0	0	0	0	0	0	0	0	0	0	0	0	0	0	0	0	0	0	0	0	0	0	0	0	0
2-isopropylpyrazine [Emmi 031218 ASDWH3	0	0	0	0	0	0	67032	0	38441.8	0	0	-1	320379	62924.4	425673	0	0	0	201444	268106	52221.5	24608.6	0	0	273245	100173	190453	0	0	20558.2	51369.4	494078	273208	0	0	44667.8
6-butyl-1,4-cycloheptadiene [Emmi 03121	0	0	0	0	0	0	0	0	0	0	0	0	74126.5	744847	0	0	0	0	0	0	187255	0	-1	0	0	256605	0	0	17740.8	0	37714.3	0	0	0	0	0
1-Hexanol	119673	54057.4	43342.3	67289	60965.5	69224.4	80160.8	50176.6	74130.5	48811.3	31622.6	29444.8	19353.9	48358.9	56078.4	-1	27414.2	53291.3	41821.7	40617.4	21509	35224.6	49940.1	39657.3	130415	336229	621464	60816	109908	189516	187868	112960	90301.7	116269	56054.9	143474
cyclohexanol, 2,3-dimethyl- [Emmi 03141	0	0	0	0	0	0	0	0	-1	0	0	0	0	0	-1	0	0	0	50071.5	-1	0	0	-1	0	75993.1	0	50981.3	83533	-1	0	0	119839	85441.8	-1	-1	-1
2-Cyclopenten-1-one (less than 80 10151	23227.2	34324.1	20239	52946.9	71952.7	30260.2	0	0	0	34918.7	65177.3	-1	0	0	0	53630.6	72730.6	31186.8	0	0	0	41533	36414	0	0	0	0	68035	48599	66049.2	0	0	0	41131.4	62781.6	54250.6
3-Hexanol, 2-methyl- (less than 80 1102	0	0	0	0	0	0	0	0	0	0	0	0	0	0	0	0	0	0	0	0	0	0	0	0	0	0	0	0	0	0	0	0	0	0	0	0
2-Hydroxy-3-pentanone	0	0	0	0	-1	0	56735.3	97448.2	76279.5	0	0	0	0	0	0	0	0	0	0	0	99662.6	0	0	0	0	0	0	0	0	0	183641	0	0	0	0	0
3-Hexen-1-ol, (E)-	0	0	0	0	0	0	0	50861.4	29472.2	0	0	0	0	0	0	0	0	0	0	0	0	0	0	0	0	0	0	0	0	0	0	0	0	0	0	0
Ethanol, 2-(vinyloxy)-	0	0	0	0	0	0	0	21363	0	0	0	0	0	0	0	0	26626.3	0	0	0	0	0	0	0	0	0	0	0	11983	0	0	0	-1	0	0	0
Cyclohexasiloxane, dodecamethyl-	2425780	2699260	2231190	2350900	2751180	2616640	2269160	3632870	2731760	3114250	7722630	1991010	2740120	2732720	3034490	2944660	2935360	2888530	3437960	2563610	3040040	2727940	3010700	3099480	1578290	2660780	2665150	2460270	2802710	2813530	2759920	1948560	2099940	2300020	3376770	2044540
(4-octanol?) (10151504)	0	0	0	-1	0	0	0	0	0	0	0	0	0	0	0	0	0	0	0	0	0	0	0	0	0	0	-1	0	-1	0	0	-1	-1	0	-1	0
6-[(Z)-1-butenyl]-1,4-cycloheptadiene [	0	0	0	0	0	0	0	0	0	0	0	0	151276	942672	0	0	0	0	0	0	336830	0	48087.6	194887	0	306533	0	0	37876.8	0	30368.8	0	0	0	0	0
SOILB1	0	0	0	0	0	0	0	0	0	0	0	0	0	0	0	0	0	0	0	0	0	0	0	0	0	0	0	0	0	0	0	0	0	0	0	0
acetic acid, 2-ethylhexyl ester [Emmi 0	0	0	0	62181.8	22537.2	21974.4	0	0	0	0	-1	0	0	0	0	0	0	0	0	0	0	0	0	0	0	0	0	0	0	0	0	0	432612	0	0	0
Dimethyl trisulfide (! 11101510)	0	51613	0	0	71509.2	0	0	0	0	0	-1	0	4312440	226813	7013690	962094	60951.6	78902.9	8677790	8036140	6444650	96432	185119	179631	4614460	3841090	4296750	217476	109691	135260	5169490	5136910	3539360	372474	473469	131248
3-Hexen-1-ol, (Z)-	117783	116054	117337	38231.8	0	0	353837	1030320	496882	193786	0	59376.2	0	0	0	0	0	0	0	0	0	0	0	0	0	0	0	0	0	0	0	0	0	0	0	0
nonanal [Emmi 022318 ASDGR3]	2453510	2049210	2238410	2675010	2159290	1969930	1718530	1583930	1809300	1868210	1953200	1973610	2378130	2528250	2235540	2027020	2640500	2198410	2686280	3444380	3033360	3270900	3367680	3041920	4619840	4823310	4880080	5662070	5379310	5962110	3597770	5605550	5311440	4968470	5293910	6302630
2-Nonanone	45388.8	74360.7	66769.8	48057.9	27723.3	50468.5	51481.8	49443	40247.9	38248.6	0	34448.1	135719	0	0	0	41090.4	40446.7	0	0	652887	64272.6	79452.8	77748.7	0	903361	0	0	114533	0	1910350	233359	317213	130473	0	94996.9
(3-Octanol)(NVC020)	61671.1	-1	0	-1	0	44666	103302	0	0	0	0	13305.6	0	0	0	0	0	0	65950.1	0	47280.2	19253.8	30762.5	30731.2	0	0	0	161210	0	123401	0	1005600	0	0	0	58828.6
(Pentamethylethanol)(NVC021)	0	0	-1	0	-1	0	0	59840.7	60402.7	-1	0	0	74308	0	208249	39647.3	0	0	271280	178453	164575	67527.6	114917	83890.7	157135	576287	538008	0	65903.7	0	602594	391966	722453	121094	144445	86468.5
(NVC009)	0	0	0	0	0	0	0	0	0	0	0	0	0	-1	0	28213.7	0	0	0	0	0	-1	0	0	0	0	0	0	0	0	0	0	0	0	0	0
Pentane, 1-nitro-	0	0	0	0	0	0	0	0	0	0	-1	0	0	0	0	-1	0	0	0	0	0	-1	0	0	0	0	0	26575.9	0	-1	0	0	0	-1	0	-1
Ethanol, 2-butoxy- (less than 70 101515	0	0	0	19350.2	0	0	0	0	0	0	23555.3	0	0	0	0	0	0	-1	0	0	0	-1	0	-1	0	0	0	40766.2	0	0	0	0	0	0	-1	-1
2-cyclohexen-1-one, 3,5,5-trimethyl [Em	0	48933.4	25645.2	0	27311.8	0	70424.6	43888.3	44021	0	0	0	418263	243954	428760	53612.2	0	0	1017240	887793	238127	112542	39639.6	70891	651699	299531	691248	31772.2	58249	97258.6	285385	645926	460251	49647.4	23068.1	79385
2-Hexen-1-ol, (E)-	27849.4	-1	-1	-1	0	0	25776.2	-1	17687	0	0	-1	33650.4	0	53677.7	0	0	0	33354.6	-1	37731.7	0	-1	0	48488.2	-1	69968.6	-1	-1	0	25006.8	-1	36820.8	0	0	-1
2,4-Hexadienal, (E,E)-	0	0	0	0	0	0	0	0	0	0	0	0	0	0	0	0	0	0	0	0	0	0	0	0	0	0	0	0	0	0	0	0	224804	0	0	0
5-Hexen-1-ol (ISTD)	0	0	0	0	0	0	0	0	0	0	0	0	0	0	0	0	0	0	0	0	0	0	0	0	0	0	0	0	0	0	0	0	0	0	0	0
Dodecane, 4,6-dimethyl-	0	153598	0	0	-1	0	0	0	0	0	30474.9	0	193103	26831.9	0	0	0	0	78522.5	0	38616.8	0	0	0	0	0	0	0	0	0	0	95982.7	109425	0	111666	0
4-Hexen-1-ol, (E)-	0	0	0	0	0	0	72648.8	0	53706.2	0	0	0	66573.4	0	0	0	0	0	0	0	0	0	0	0	0	0	0	0	0	0	0	0	0	0	0	0
2-octanol (R) [Emmi 031418 ASDGR3]	0	0	0	0	0	0	0	0	0	0	0	0	-1	-1	-1	0	0	0	35044.6	36046.1	26792.6	0	-1	0	53985.1	54325.3	41749.7	-1	-1	11894.4	61111.7	73106.9	64872.8	-1	0	-1
N,N-Dimethylacetamide	0	0	0	0	0	0	0	0	0	0	0	0	0	0	0	0	0	0	0	0	0	0	0	0	0	0	0	0	0	0	0	0	0	0	0	0
2-Hexen-1-ol, (Z)-	0	0	0	0	0	0	0	0	0	0	0	0	0	0	0	0	0	0	0	0	0	0	-1	0	0	0	0	0	0	0	0	0	0	0	0	0
Butyl hexanoate	0	0	0	0	0	0	0	0	0	0	0	0	0	0	0	0	0	0	0	0	0	0	13731.6	14267.6	-1	-1	0	0	-1	-1	37529.5	36827.3	40063	36551	38925.3	36516.5
Hexyl butanoate	0	-1	0	0	0	-1	0	0	0	0	0	0	0	0	0	0	0	0	0	0	33513.4	0	-1	0	0	0	0	0	25483.9	0	0	0	0	0	0	0
2-Octanol	0	0	0	0	0	0	0	0	0	0	0	0	0	0	18130.6	0	0	0	27413.3	15823.8	-1	0	0	0	75963.2	125657	86346.1	0	0	0	87495.3	127794	114843	0	0	28586.9
Benzene, 1,3-bis(1,1-dimethylethyl)-	138649	150622	136095	137983	199065	173688	154450	150954	159136	153982	191295	166627	196002	204910	259901	232660	194982	194568	208156	191214	151123	200955	181247	214476	276387	216129	220574	225389	215151	242548	303237	227994	248017	226774	354050	207966
Cyclotetrasiloxane, octamethyl-	50820	62096.2	53849	51483.6	71823.4	70077.8	51426.2	58813.4	55105.7	64421.3	97562.6	69353.4	63677	59189.8	63371.3	62420.4	64659.8	65909.8	62664	59203.2	68280.2	63710.6	64513.7	68634.7	47871.6	53558.4	71089.2	64935.4	61068	81406.1	44254.6	62469.1	57057.8	63682.9	70539.8	62511.1
Hexyl 2-methylbutanoate	0	0	0	0	0	0	0	0	0	0	0	0	0	0	0	0	0	0	0	0	0	0	0	0	0	0	0	0	0	0	0	0	0	0	0	0
Acetic acid	4819590	4668370	5961910	5128780	5920650	4728010	4956990	3617880	4407760	3496500	6514700	4310870	4384180	4320820	5766970	4553690	3758110	3218400	8272890	6705380	6535450	6198340	4442870	4161200	12322100	25155600	14546200	8858180	8896910	8217370	50235600	19945400	49809300	14398300	8885940	12773400
benzene, 1-methoxy-4-methyl [Emmi 02231	0	0	0	0	0	0	0	0	0	0	0	0	16058.1	50700.7	0	0	25888.8	34025	637657	829436	203068	295591	1465600	122202	571843	524847	940926	100755	96650.4	138555	463225	1160820	1168930	724581	258342	238083
2-Octenal, (E)-	-1	-1	0	-1	0	-1	32956.6	33042.2	37187.7	15551.8	54052.3	22781.2	36032.6	41324.6	48419.3	32277.8	-1	29342.7	0	76493.8	74588.6	42648.5	33492.5	0	0	67141.2	65263.6	70423.9	65691.4	62044.1	94478.2	134292	0	56745.7	0	35031.4
Benzene, 1,4-dichloro-	3489570	4664880	3664100	5298080	7058720	7091380	2709550	2368090	2774270	3953460	4138940	5504640	3760580	3239860	3978770	3360130	7719010	7031620	6344130	5009410	4198530	5113480	5404270	5202820	3813790	4237850	4380160	2824350	2995620	2389040	3306040	4173170	3676000	1895340	1638050	1784910
Ethyl octanoate	0	0	0	0	0	0	0	0	0	0	0	0	0	0	0	0	0	0	0	0	0	0	0	0	0	0	0	0	0	0	0	0	0	0	0	0
(2-propenyl-thiocyanic acid)	0	0	0	0	0	0	0	0	0	0	0	0	0	0	0	0	0	0	0	0	0	0	0	0	0	0	0	0	0	0	0	0	0	0	0	0
1-octen-3-ol [Emmi 031418 ASDGR2]	-1	19825.7	14169.1	-1	24403.7	0	-1	-1	-1	-1	0	0	0	0	0	0	0	0	0	0	60694.2	0	0	0	0	0	0	-1	-1	0	0	0	0	0	0	0
((Z)-Linaloloxide) (GSV15)	0	0	0	0	0	0	0	0	0	0	0	0	106803	0	0	0	0	0	242582	200206	155160	0	40820.6	0	198139	173112	216302	0	0	0	155867	221310	185657	0	0	0
Propanoic acid, 2-oxo-, methyl ester (1	-1	-1	-1	-1	28813.7	16805	0	0	-1	0	21777.8	13887.4	0	-1	0	-1	18036.5	-1	0	0	0	-1	-1	0	0	0	0	-1	-1	-1	24449	-1	0	-1	-1	-1
Benzene, 1,4-dichloro-	3489570	4664880	3664100	5298080	7058720	7091380	2709550	2368090	2774270	3953460	4138940	5504640	3760580	3239860	3978770	3360130	7719010	7031620	6344130	5009410	4198530	5113480	5404270	5202820	3813790	4237850	4380160	2824350	2995620	2389040	3306040	4173170	3676000	1895340	1638050	1784910
dl-6-methyl-5-hepten-2-ol [Emmi 031418	0	0	0	0	0	0	0	0	0	0	0	0	0	0	0	0	0	0	55503	0	0	0	0	0	61426.7	75007.9	180172	0	0	0	59869.7	171696	47444.5	0	0	0
(1-Heptanol) (NVC001)	23555.3	-1	-1	34075.4	25487.3	0	-1	22164.2	-1	-1	31418	-1	-1	24944.6	46247	21574.6	22434.7	-1	47033.3	-1	62956.3	0	-1	24528	79552.2	73518.2	31765.6	30043.4	52290	0	87870.5	106591	64180	48862.8	41297.8	63823.2
glycidol [Emmi 020218 ASDGR1]	199031	141671	147402	230195	210665	111050	130062	189214	133846	78642.5	185554	133780	120444	145097	107495	159194	140326	83144.9	0	71512.6	101931	107550	84527.4	87859	182856	0	0	189319	0	165846	0	0	0	98456.4	108016	0
2-Hexanone, 3,3-dimethyl- (10151504)	19264.6	28959.3	47611.9	20487.7	17590.6	43036.6	-1	-1	-1	-1	-1	-1	-1	-1	33173.5	47004.7	-1	-1	34495.4	50767.6	35793.1	-1	-1	-1	36314	63001.8	71289.7	33985.1	47663.3	75432	45150	57180.5	63571.2	39252.1	77589.1	51014.9
6-Methyl-5-hepten-2-ol,	0	0	0	0	0	0	0	0	87675.8	0	0	0	159311	0	246994	0	0	0	276982	163188	168378	0	0	0	476259	366859	469018	44198.2	0	0	498259	629672	638481	90661.2	0	0
2-Methylbutyl hexanoate	0	0	0	0	0	0	0	0	0	0	0	0	0	0	0	0	0	0	0	0	0	0	0	0	0	0	0	0	0	0	0	0	0	0	0	0
(3-Furaldehyde)(NVC029)	0	0	0	0	0	0	0	0	0	0	0	0	0	0	0	23797.2	0	0	0	0	0	0	0	0	0	0	0	0	0	0	0	0	0	0	0	36057.7
Furfural	176161	146425	110640	179915	335168	210946	89177.8	113486	154263	127801	281845	112610	112261	263234	171133	163681	199895	130751	0	119287	0	87507.8	95595.4	107530	216418	0	0	150583	142041	117953	0	0	0	103802	152011	217581
3-Isopropoxy-1,1,1,7,7,7-hexamethyl-3,5	2101180	2704280	1894320	2042870	3558280	3164480	2461040	3126250	2864420	2792570	3439030	2384140	3193320	3461980	3685040	3613540	3175210	2686070	2182320	2009800	2577370	2242520	2501030	1983500	777852	1123070	1089920	1116320	1207330	1110460	2056260	1892180	1847720	2052820	2000130	1703340
ethane-1,1-diole dipropanoate [Emmi 050	0	0	0	0	0	0	0	0	0	0	0	0	0	0	0	0	0	0	0	0	0	0	0	0	0	0	0	0	0	0	0	0	0	0	0	0
2-Ethyl-1-hexanol	197694	304868	282870	194295	314308	273632	411914	354522	463354	189509	138949	260281	1144190	690908	463821	248032	281355	275656	1265790	1370250	3642950	1025300	1201650	1140210	1129950	3541520	1177200	907257	803230	546580	9948100	1652200	1767270	2177610	1073770	818553
Cyclohexanecarbonitrile, 1-(1-piperidin	0	0	0	0	0	0	0	-1	-1	13366.1	0	0	394839	88821.6	739739	104279	23155.4	27664.6	256470	2228900	47930.4	187518	39285.1	39029.8	1943450	153339	296065	244321	84144.5	143240	34460.2	4405710	706065	122784	22683.4	495187
3-Hydroxy-4-methoxybenzaldehyde, tert-b	19301.5	-1	20462.4	21719	24909.4	22229.8	16250.1	20796.7	19968.5	24501.1	27410.9	19093.2	-1	-1	22412.9	23131.9	17453.5	21952.6	18617.8	-1	12983	18160.8	19657.7	15673.6	19980.2	-1	18108.7	20701	-1	26979.1	-1	14580.7	-1	17776.1	18912.4	19291.4
Decanal	1185020	1302440	1321130	1284270	1152740	1429830	1447180	1295350	871846	1167340	1097420	911447	918687	1017400	1120690	1008760	1441760	1181990	1457590	1996090	2033330	2229180	1873330	1659920	3074590	2380970	2909400	2726200	2975810	3481640	2124900	2160740	2555140	2720660	2451840	3033720
Benzaldehyde, 2,5-bis[(trimethylsilyl)o	140376	161606	162637	123613	193586	152204	101479	102218	83916	106999	18196.1	104142	115056	100398	119725	116070	117637	112353	101983	111016	120668	157962	148611	143408	83726.2	101737	103360	131541	130150	155247	115651	101600	116708	123773	122835	122761
Pentyl hexanoate	0	0	0	0	0	0	0	0	0	0	0	0	0	0	0	0	0	0	0	0	0	0	0	0	0	0	0	0	0	0	0	0	0	0	0	0
4-ethyl-2-octanol [Emmi 031418 ASDGR3]	0	0	0	0	0	0	0	0	0	0	0	0	0	0	61074.7	0	0	0	34973.9	26302.5	100661	0	0	-1	35730.4	1023040	63831.6	20128.1	92153	28062.7	2059540	202868	204390	124105	21169.7	63137.8
SOILA6	0	0	0	0	0	0	0	0	0	0	0	0	0	0	0	0	0	0	0	0	0	0	0	0	0	0	0	0	0	0	0	0	0	0	0	0
Propanoic acid (! 11101510)	1118050	1154370	909107	1247140	1447970	1337490	989409	952234	479736	388297	1450830	632575	669324	695602	724236	547258	553634	528128	1555410	1348880	855444	799260	517252	596109	2339770	7192030	2552020	1343420	1792120	1291760	9408690	4436490	9747560	2117590	1259810	1713000
Benzaldehyde	462239	542529	474664	434801	471781	453600	381629	410044	374989	367994	480094	351350	331026	333683	465508	290230	338940	366348	452803	439265	486177	365844	366169	447350	722491	613995	820549	625106	520343	560779	515577	677100	716120	425845	437294	453197
(DL-2,3-Butanediol)(NVC010)	0	0	0	0	0	0	0	0	0	0	0	0	0	0	0	0	0	0	0	0	0	0	0	0	0	0	0	0	0	0	0	0	0	0	0	0
2-Nonenal, (E)-	23380.6	-1	25808.4	25020.2	-1	22664.7	28506.8	-1	25317.6	23053	21473.8	24902.6	32534	25485.6	36551	27189.1	-1	23751.8	27544.7	36325.7	28825.4	30327.9	28099.7	25660.3	40546.8	33033.8	28095.7	40078.1	33709.2	37793.3	25376.6	35784	48679.7	35764.1	26703.9	35738.8
linalool	0	-1	0	0	0	0	-1	-1	-1	0	-1	0	-1	0	24983.3	0	0	0	-1	-1	-1	0	-1	-1	-1	-1	-1	0	0	-1	-1	-1	-1	-1	677210	0
benzene, 1-(chloromethyl)-2-methyl [Emm	0	0	0	0	0	0	0	0	0	0	0	0	0	0	0	0	0	0	14819.6	-1	16210.7	0	0	0	0	0	0	0	0	0	0	0	0	0	0	0
cyclodecene, 1-methyl [Emmi 031218 ASDW	-1	18078.3	0	-1	47268.5	32526.5	-1	-1	0	0	-1	0	41889.1	177789	16091.8	0	0	0	-1	-1	27234.7	0	0	0	22192.8	0	-1	20140.2	17838.2	0	15557.4	-1	0	43084.3	27910.5	29975.8
1-Octanol	103677	94083.4	87027.4	103811	76393.4	85006.3	89821.9	79202.4	81497.1	82902.4	86141.9	0	65619	73259.5	0	0	82463.6	91962.5	79407.3	54912.5	51752.4	101136	85766.7	75400.1	177695	285031	129323	179511	176220	227419	156712	221331	136108	194336	161389	237917
4-penten-1-ol, 2-methylene [Emmi 031418	57656.9	95774.8	66361.8	114592	114315	146439	44941.7	0	65254.7	84698.1	41521.2	79101.9	0	28052.9	0	29094.7	0	45084.3	36217.4	0	55539.1	0	0	0	0	82075	66090.5	0	0	0	0	0	0	0	148283	0
2-Methylpropanoic acid	69866.2	84504.3	68246.6	59819.8	68139.1	80090.6	120217	0	75293.1	0	0	0	382568	0	181677	0	0	0	1637100	854848	371193	267755	294053	276362	1934900	2880570	2309490	452498	538329	631299	4960320	3533990	7079850	1288130	701230	1028810
Propanoic acid, 2-hydroxy-, ethyl ester	0	0	0	0	0	0	0	0	0	0	0	0	0	0	0	0	0	0	0	0	0	0	0	0	0	0	0	0	0	0	0	0	0	885067	0	0
Dimethyl Sulfoxide (11021517)	108609	152520	139794	36672.7	51198	40298.2	327639	193847	201047	85717	88285.9	81404.4	593719	235487	472070	89909	53996.9	66098.9	799762	1375960	1017900	137488	168433	102389	555976	748047	889049	158031	195876	174166	800550	2032870	1369080	160705	127433	221958
2,4,4-trimethylbut-2-enolide [Emmi 0314	0	0	0	0	0	0	0	0	0	0	20540.5	0	0	0	0	0	0	0	0	0	0	0	0	0	0	0	0	0	0	0	0	0	0	0	0	0
isobornyl acetate [Emmi 020218 ASDGR3]	0	0	0	0	16616	-1	0	0	0	0	0	0	0	0	0	0	0	0	0	0	0	0	0	0	0	0	0	0	0	0	0	0	0	0	131694	0
Hexadecane (10151504)	0	27136.5	0	0	0	0	0	0	0	0	165882	0	51896.5	0	-1	0	0	0	18592.6	0	0	0	0	0	0	0	0	0	0	0	0	0	34059.2	-1	0	21858.7
Methyl decanoate	0	0	0	0	0	0	0	0	0	0	0	0	0	0	0	0	0	0	0	0	0	0	0	0	0	0	0	0	0	0	0	0	0	0	0	0
1-propene, 2-(1-methylethoxy) [Emmi 031	0	-1	-1	22999.2	24239	-1	-1	0	0	0	0	0	-1	-1	15074	0	17342.6	-1	16342.3	-1	44467.2	0	13515.4	0	42937.4	53733	25746.8	-1	19908.3	29734.3	51777.6	22947.1	26392.2	25394.6	-1	23125.2
Undecanal (10151504)	43417.9	63598.1	49348.3	41833.7	63263.1	41044.2	78571.9	45395.3	47137.4	59011.9	59886.3	60866.1	68700.2	58740.6	116309	52151.1	53780.9	60047.1	128146	158347	89816.2	101472	76949	64745.5	160351	147850	148406	121199	113052	133291	120752	142367	158572	93839.3	105094	120009
(ethylene/nitric oxide)	0	0	0	0	0	0	0	0	0	0	0	0	0	0	0	0	0	0	0	0	0	0	0	0	0	0	0	0	0	-1	-1	0	0	0	0	0
Benzonitrile (10151504)	87744.7	82017.6	80999.5	100805	89775.8	100862	81154.1	107717	87099.6	81728.6	113884	93693.6	78375.4	77320.3	114974	82042.8	87390.2	88163	88629.3	103174	124048	121020	124261	111213	123000	116616	114248	128231	125634	135284	75458.9	97391.3	84406.6	100204	101591	109020
Butanoic acid (! 11101510)	281219	296614	283460	328035	355565	350485	228616	225036	188718	203584	412608	216545	309301	172943	338051	204920	149935	152831	2459430	1348650	885095	618507	562018	964890	3566100	9219580	4113480	1094780	2246910	1374570	22306400	8187080	18148600	6443590	2241120	2956280
Hexyl hexanoate	0	0	0	0	0	0	0	0	0	0	0	0	0	0	0	0	0	0	0	0	0	0	0	0	0	0	0	0	0	0	44348.6	-1	-1	47646.7	-1	36269.6
Pentanoic acid, octyl ester	0	0	0	0	0	0	0	0	0	0	0	0	0	0	0	0	0	0	0	0	0	0	0	0	0	0	0	0	0	0	0	0	0	0	0	0
Butyl octanoate	0	0	0	0	0	0	0	0	0	0	0	0	0	0	0	0	0	0	0	0	0	0	0	0	0	0	0	0	0	0	0	0	0	-1	-1	51303.8
2-propenoic acid [Emmi 031418 ASDGR2]	34108	24534.7	28170.2	45672.5	75679	42633.4	55027.1	43600.3	33638.6	31461.4	197904	36146.9	31473.3	23022.7	217842	23983.7	35968.8	30280.3	36062.9	31675.9	27856.1	27489.8	-1	21346.1	149404	75909.1	0	42636.7	48494.9	49356.7	110757	76515.6	109934	73503.4	39935.3	66410.4
(1,2-Ethanediol) not likely	0	0	0	0	78242.6	94089.5	0	36163.8	54067.3	0	210761	0	0	62349.4	0	0	0	42424.4	0	73955.9	0	0	0	0	0	0	0	98094.1	0	0	0	0	0	0	0	18754.5
Cyclooctasiloxane, hexadecamethyl-	321562	370375	300781	337538	449610	423751	369375	464743	372097	340427	460532	347745	428622	462376	510992	440139	506828	430278	489414	488556	512722	443620	475701	420932	579399	491199	478965	451105	453341	577283	674843	945381	722986	803056	722823	784608
(4,5-dihidro-2(1H)-pentalenone)	0	0	0	-1	0	-1	36237.6	35843.3	0	0	36456	50598.4	0	0	55174.6	0	-1	27083.1	22602.7	0	42897.1	-1	0	0	38396.4	37483.2	29011.9	22443.1	0	34352.6	30813.3	40250.3	29588.9	-1	0	18822.7
(NVC011)(ESTER)	0	0	0	0	0	0	0	0	0	0	0	0	0	0	0	0	0	0	0	0	0	0	0	0	0	0	0	0	0	0	0	0	0	0	0	0
(Silanediol, dimethyl-) not likely	811707	964974	1054780	989403	1038280	1114320	1025710	1080410	1179170	1060730	1398510	1051680	1020390	979139	1302270	938597	793908	934343	1028640	994729	1441250	800830	897986	770501	1527660	802560	1008070	998755	814701	1372870	865230	1303130	880095	1232520	816595	1338620
Butyrolactone	85310.4	63939.1	64911.8	77028	138372	105212	59041.9	52940.2	51609.6	66830.8	88104.2	56465.9	55596.2	90625.9	87780	73465.5	84307.4	64216.3	78283	86876.2	-1	61980.2	59221.7	60784.1	77123.8	58324.6	88203.4	72770.9	62509.4	69636	120305	84631.7	103638	70704.5	96700.8	86887.9
2-Furanmethanol (10151504)	64567.3	57246.7	37969.7	46307.5	172020	102419	47796.7	41180.2	69770.4	57639.1	126724	33994.9	60305.3	100365	81500.2	81602.6	93292.1	54348	28764.6	39212.9	27629.3	30240	27703.2	0	49724.6	23397.9	69636	63776.2	53862.5	36042.7	113052	31397.5	72999.4	39482.9	97119.1	78402.2
Phenyl acetaldehyde	63006.8	69174.2	57365.4	51782.6	78259.3	52237.9	0	39297.2	-1	42158.7	0	54653.6	0	38692.1	59799.6	36925.4	41010.5	40710.9	45099.6	53875.9	0	36727.7	52576.6	45585.1	44263	58396.8	0	0	64879.4	0	53419	50143	40079.4	0	59968.3	0
2-Decenal, (E)-	0	0	-1	-1	0	0	-1	0	-1	0	-1	-1	0	0	-1	-1	0	0	0	0	-1	-1	-1	-1	26345	-1	18061.5	21846	18253.6	26329.8	-1	30427.7	17759.9	-1	-1	-1
(trimethylamine)	0	0	0	0	0	0	0	86832.5	86286.5	0	0	83326.3	0	66805.2	0	97970.9	75480.5	78409	1626780	0	0	0	0	0	0	3601100	2651790	0	0	0	4403300	4433320	7747230	0	0	1467370
Acetophenone (11101510)	303653	334265	318242	298518	330569	382704	288415	274357	233192	201286	317910	198751	301276	179238	354186	165314	209604	240564	567393	566427	474872	393938	385382	394528	539152	558963	484529	461968	478931	487812	414132	443896	436331	297215	257571	339721
1-nonanol [Emmi 022318 ASDGR1]	28991.8	22176.3	24661.7	-1	-1	28599.5	40906.7	-1	0	46969.4	35107.3	0	32548.3	0	37176.7	0	22616.1	37633.7	39048.2	50211.3	52595.6	42345.7	30311.5	30618.1	128154	146619	129123	56983.3	69964.6	103919	88964.6	149128	125875	85990.6	58129.1	97361
cyclohexene, 1-chloro-5-(1-chloroetheny	0	0	0	0	0	0	244490	132035	191219	147363	66565	180030	239625	204940	265564	166290	287939	262310	336084	388718	275545	314652	225335	210759	322977	410928	350418	92757.8	237392	248818	338607	383304	402081	157733	115319	143257
a-Piperidinopropiophenone	0	0	0	0	0	0	0	0	52019.5	0	338703	0	0	0	0	133649	56234.6	0	0	0	0	0	0	0	0	0	0	0	0	0	90496.6	0	0	0	52824.2	0
Butanoic acid, 3-methyl- (11021517)	37036.4	33956.2	40388.9	37822.7	37359.8	41531.3	39083.6	24932.9	28375.2	-1	41959.7	30485.3	90755.3	26567.5	64412.9	28561.7	48757.6	21157.9	792016	384564	218709	144330	153224	136935	681303	1201990	1222910	237493	323817	522682	1504480	1426230	3545430	748189	296718	487874
disulfide, methyl (methylthio)methyl [E	0	0	0	0	0	0	0	0	0	0	0	0	142941	0	168158	0	0	0	157778	196093	198180	0	0	0	0	0	93848.2	0	0	0	74193.8	107906	92584.8	0	0	0
Ethyl trans-4-decenoate	0	0	0	0	0	0	0	0	0	0	0	0	0	0	0	0	0	0	0	0	0	0	0	0	0	0	0	0	0	0	0	0	0	0	0	0
Decane, 1-chloro-	0	-1	-1	-1	0	-1	-1	22873.9	20386.8	19405.7	55843.2	-1	0	0	-1	-1	-1	-1	29536.4	-1	22787.5	-1	-1	-1	-1	-1	-1	-1	-1	-1	-1	-1	-1	-1	-1	-1
(methyl 1-propenyl disulfide)	19100	-1	22198.8	21258.7	22431.4	0	22357.4	21697.2	21651.1	0	21490.6	18617.6	-1	-1	21307.4	-1	26014.4	-1	19978.6	0	0	-1	-1	-1	30102.2	0	0	0	0	0	0	0	26355.8	26369.3	-1	0
Cyclohexene, 1-chloro-4-(1-chlorothenyl	0	0	0	-1	0	0	247705	155917	196525	146091	47985.8	189203	264084	197198	288816	172308	295366	268627	338270	392364	310593	249786	195814	194722	333514	388251	373866	91247.5	184546	197756	388828	422063	383428	119640	74388.7	108409
2-Methylbutanoic acid	65654.4	63092.4	64559	55162.8	73810.8	76745.8	72744.8	40859.3	45163.4	33490.8	52893.1	48021.1	191086	41449	103656	59394.7	0	40304.9	1071510	732403	357801	237396	259978	244741	1710640	2234870	1516230	325599	543791	453096	2699280	2617650	5611310	1323920	535650	801935
Estragole	0	0	0	0	0	0	0	0	0	0	0	0	0	0	0	0	0	0	0	0	0	0	0	0	0	0	0	0	0	0	0	0	0	0	0	0
2-Propenoic acid, 2-methyl- (below 80 1	41591.9	61488	86091.6	80873.5	83466.9	86252.9	66771.6	91874.2	82517.2	94881.4	171399	64602.7	148437	166488	163738	158142	117156	111418	52347.1	66570	86877.2	79580.9	54707.5	43024.8	536799	155808	408832	318096	99177.1	254843	174503	165572	187748	131959	121076	155158
(methyl 2,4 hexadienoic acid))	0	0	0	0	0	0	0	0	0	0	0	0	0	0	0	0	0	0	0	0	0	0	0	0	0	0	0	0	0	0	0	0	0	0	0	0
2-Ethyl benzaldehyde	0	0	0	0	0	0	0	0	0	0	0	0	0	0	0	0	0	0	0	0	0	0	0	0	0	0	0	0	0	0	0	0	0	0	0	0
2-Pyrrolidinone, 1-methyl- (10151504)	0	0	0	0	0	0	0	0	0	0	0	0	0	0	0	0	0	0	0	0	0	0	0	0	0	0	0	0	0	0	0	0	0	0	0	23194.6
Salicylaldehyde	19922.5	0	22500.3	22083.6	23718.2	21786.2	0	21687.1	22770	20435	23879.5	0	-1	-1	0	0	0	0	23528.4	27212.6	29297.5	-1	22742.2	-1	31321.9	0	25794.7	0	20601.8	0	18953.8	27300	28875.8	0	22229.8	0
Heptadecane (10151504)	0	0	0	0	0	0	0	0	0	0	1051970	0	46337.8	0	274524	0	30947.3	0	45712.4	0	-1	0	0	-1	61370.4	0	19177.1	0	0	17705.5	0	0	47383.9	0	0	47228.3
2(3H)-Furanone, 5-ethyldihydro- (110215	0	0	0	0	30965.8	0	0	0	0	0	0	0	43665.8	0	0	0	0	0	100232	101441	41089.4	50482.8	49121.1	43364.1	162599	147993	170063	87379.7	84482	82048.2	153345	287755	289750	0	101780	0
2-furoic acid, 4-cyanophenyl ester [Emm	0	0	0	0	0	0	0	0	0	0	0	0	0	0	0	0	0	0	0	0	0	0	0	0	0	0	0	0	0	0	0	0	0	0	0	0
Dodecanal (10151504)	17208.2	25573.9	-1	-1	-1	-1	-1	28150	-1	-1	30577.1	-1	17628.7	14515.5	32568.5	-1	-1	-1	23331.8	28123.3	39486.5	34885.2	26570.9	22022.9	75902.6	56281.7	66845.9	36422.9	39774.6	65346.8	24548.3	39015.8	29947.7	37183.4	54542.9	57474.3
2(5H)-Furanone, 3-methyl- (below 80 101	116595	101049	79435.4	127636	189418	111658	70721.3	49314.7	99306.5	53603.8	104210	111853	39958.8	38341	50971.2	30203	51942.2	31696.6	38512.4	67880.4	54307.7	42100.8	55426.6	37685.8	56295.1	61316.6	59030.2	90081.6	73031.3	43742.2	54642	81960.5	43495.2	51144.2	55261.9	31046.4
(Z,E) a-farnesene	0	0	0	0	0	0	0	0	0	0	0	0	0	0	0	0	0	0	0	0	0	0	0	0	0	0	0	0	0	0	0	0	0	0	0	0
(4-nitrophenyl-2-thiophencarboxylic aci	13527.4	0	0	0	0	0	0	0	0	0	0	0	0	0	0	0	0	0	0	0	0	0	0	0	0	0	0	0	0	0	0	0	0	0	0	0
Pentanoic acid (! 11101510)	119282	37223.8	119776	142840	113420	108012	37880.6	96064.1	77689.9	32918.8	325638	120459	72485.3	69510	224368	86235.7	68475.1	73285	123954	118870	110632	117172	87759.8	76302.2	390034	474739	274677	218153	195885	199161	1333880	705610	2056200	454818	235712	368773
Oxime-, methoxy-phenyl-_	0	129712	0	0	0	129789	69893.8	142279	-1	126050	-1	42509.8	13135.9	0	0	0	7830.89	0	0	0	82835.4	39163.2	29265.6	4718.07	115248	119968	0	84028.6	0	0	0	0	86739.3	0	0	-1
4-Ethyl-benzaldehyde	0	0	0	0	0	0	0	0	0	0	0	0	0	0	0	0	0	0	0	0	0	0	0	0	0	0	0	0	0	0	0	0	0	0	0	0
a-farnesene	0	0	0	0	0	0	0	0	0	0	0	0	0	0	0	0	0	0	0	0	0	0	0	0	0	0	0	0	0	0	-1	-1	-1	0	-1	-1
Acetamide (10151504)	68599.6	60132.5	0	109227	282311	249240	250179	192831	160212	174455	161490	222348	148795	188325	229833	97897.1	98473.3	158874	47735.5	84064.9	127066	83095.1	200415	126952	143630	89719.7	90657.7	149705	131797	147217	110764	311346	85016.3	118579	84408.3	133000
Naphthalene	58815.9	67090.8	67053.8	67972.8	85634.6	80087.3	55189.7	51590	45704.4	49798.6	50653.7	50939.3	87425.5	78276.2	106021	77215.8	84233.5	96390	197244	193225	187795	193118	172395	154995	246414	156022	225083	118205	109138	215808	183174	194952	209958	164538	171180	173053
pentenal, 5-(benzoyloxy) [Emmi 031418 A	0	0	0	0	0	0	0	0	0	0	0	0	0	0	0	0	0	0	0	0	0	0	0	0	0	-1	36588.7	0	0	0	16983.1	0	0	0	0	0
Benzenemethanol, .alpha.,.alpha.-dimeth	333593	224658	244107	252459	374103	192966	128554	137424	335598	317493	391190	265018	168071	190806	198482	158684	146237	119729	77484.7	66161.8	76490.4	66150	55040.2	49667.5	48048	47354.2	0	0	0	0	0	0	0	0	0	0
2(5H)-Furanone	0	0	0	0	230411	173652	0	0	0	0	0	0	0	0	0	0	0	70085.3	94863.6	145938	92575.6	0	81313.7	78768.6	133422	0	188912	169324	140125	140579	205836	130913	124751	110206	109061	175022
Ethyl trans-2-decenoate	0	0	0	0	0	0	0	0	0	0	0	0	0	0	0	0	0	0	0	0	0	0	0	0	0	0	0	0	0	0	0	0	0	0	0	0
1-chloroundecane [Emmi 041318 ASDRB1]	0	0	0	0	0	0	-1	-1	16484.4	20275.9	23341.9	-1	0	0	31728.5	0	0	0	-1	0	-1	0	0	0	0	0	0	0	0	0	0	0	0	0	0	-1
2-Cyclopenten-1-one, 2-hydroxy-	116436	143073	92255.7	29761.4	251789	175032	64065.1	37092.7	76159.4	60800.9	405607	24440.6	106537	180212	226565	130432	196129	97649.1	-1	68574.2	-1	78976.8	66249.1	-1	113508	-1	116582	34538.1	90972.6	-1	225334	141222	193786	97508.9	144008	185329
Pentyl glycolate (less than 80 10151504	0	0	0	0	0	0	0	0	0	0	0	0	0	0	0	0	0	0	0	0	0	0	0	0	0	0	0	0	0	0	0	0	0	0	0	0
formamide, N,N-dibutyl- [Emmi 031418 AS	66593.5	56159	0	0	40212.5	59220	-1	116474	72549.1	72844.8	0	89673.4	56422.8	48180.7	99000.7	57425.8	64846.3	0	0	101637	115676	96900.7	91487.8	84697.2	183547	118292	176875	159882	0	213414	119346	170433	117634	145826	131074	0
Cyclotrisiloxane, hexamethyl-	0	0	0	0	0	0	0	0	0	0	0	0	0	0	0	0	0	0	0	0	0	0	0	0	0	0	0	0	0	0	0	0	0	0	0	0
Methyl salicylate	0	0	0	52694.9	0	0	0	0	0	0	32884.3	0	43832.9	0	45477.6	45830.4	0	0	0	0	0	0	0	0	49282.8	0	39730.3	0	0	0	90436.1	107431	99765.1	89266.8	91173.6	92211.8
Octadecane (10151504)	1496630	0	1421200	739032	0	0	0	24575.6	417587	0	2642880	30588.9	0	52980.3	1213390	0	36739.5	213835	397503	0	0	631774	40883.4	-1	262908	0	0	0	901600	73558.3	0	807490	591765	0	0	205607
Pentanoic acid, 4-methyl- (below 80 111	0	0	0	0	0	0	0	0	0	0	0	0	0	0	0	0	0	0	0	0	0	0	0	0	0	53720.6	-1	0	-1	0	74781.8	75344.8	55152.7	0	0	0
Ethylamine, 2-((p-bromo-.alpha.-methyl-	0	0	0	0	0	0	0	0	31246.3	0	0	134198	0	0	0	0	0	0	199520	0	0	0	0	0	0	0	0	0	0	0	0	0	0	0	0	0
ethanol, 1-(2-butoxyethoxy) [Emmi 03091	0	0	0	0	0	0	0	0	23318.4	67191	90217.2	0	0	0	54316.9	-1	0	0	0	0	0	0	0	0	53796	0	0	0	0	0	193432	314114	265704	128058	111700	224729
(Methyl 2,4-Decadienoate)(NVC024)	0	0	0	0	0	0	0	0	0	0	0	0	0	0	0	0	0	0	0	0	0	0	0	0	0	0	0	0	0	0	0	0	0	0	0	0
Hexyl octanoate	0	0	0	0	0	0	0	0	0	0	0	0	0	0	0	0	0	0	0	0	0	0	0	0	0	0	0	0	0	0	0	0	0	0	0	0
Z-2-Dodecenol (below 70 10151504)	33791.5	24264.2	22233.1	24516.2	16069.8	23675.9	27666	-1	-1	16460.8	-1	-1	-1	-1	-1	-1	-1	-1	26307.9	27276.5	28808.6	37837	21073.9	27918.2	47520.5	53521.4	41932.9	58089.4	50971.2	57536.6	39601	43213	48817.4	55920.1	42073.9	63336
oxazirane, 2-(dimethylethyl)-3-methoxy-	-1	27090	0	25909	21294	29341.2	47985.8	38480.4	40731	25221.8	47283.6	0	30468.5	30075.4	35407.7	-1	-1	24467.5	31760.4	37154.8	33566.4	28505.2	-1	-1	60540.5	34705.4	40751.8	31916.6	38764.3	42670.3	51065.3	56518.6	42853.4	36251	36432.5	47503.7
(Uracil)	16922.6	20452.3	0	21927.4	43841.3	-1	0	0	-1	0	55218.2	12388.3	26730.5	33440.4	34505.5	33453.1	33269	22176	0	17453.5	24552.1	0	0	0	0	0	-1	18971	0	19022.6	31708.3	-1	0	0	17472	24203.8
(5-cyano-1,2,3-thiodiazole)	0	0	0	0	0	0	0	0	0	0	0	0	0	0	0	0	0	0	0	0	-1	0	0	0	0	0	0	0	0	0	0	-1	0	0	0	0
Ethyl salicylate	0	0	0	0	0	0	0	0	0	0	0	0	0	0	0	0	0	0	0	0	0	0	0	0	0	0	0	0	0	0	0	0	0	0	0	0
2-Phenylethyl acetate	0	0	0	0	0	0	356052	67196.6	167160	0	0	-1	49029.1	0	0	0	0	0	0	0	0	0	0	0	0	0	0	0	0	0	0	0	0	0	0	0
(E,Z)-Ethyl 2,4-decadienoate	0	0	0	0	0	0	0	0	0	0	0	0	0	0	0	0	0	0	0	0	0	0	0	0	0	0	0	0	0	0	0	0	0	0	0	0
Hexanoic acid	171153	134854	144808	199443	173862	155025	124135	137661	101464	140178	376323	170615	133804	93874	347491	152833	125447	122926	172192	174105	176912	191446	161950	131243	363342	286845	261153	288572	248611	287393	355038	366087	441635	404213	239681	395941
5,9-undecadien-2-one, 6,10-dimethyl- [E	151837	241414	141463	148016	131813	289266	154782	271129	356340	179175	131379	98874.7	207764	95944.8	129441	150889	76285.4	358583	381716	236468	130901	313418	69977	175868	249352	292058	368182	384391	326707	483222	374129	816085	454618	590004	525146	765706
(4-Methyl-1,5-heptadiene)(NVC002)	0	0	0	0	0	0	0	0	0	0	0	0	0	0	0	0	0	0	0	0	0	0	0	0	0	0	0	0	0	0	0	0	0	0	31464.9	0
oxazolidine, 2,2-diethyl-3-methyl [Emmi	24706.3	0	0	0	52399.2	-1	0	-1	23659.4	17083.9	40679.5	0	0	-1	0	0	0	0	0	0	0	0	0	0	0	0	0	0	0	0	0	0	0	0	0	0
(NVC030)	0	0	0	0	0	0	0	0	0	0	0	0	0	0	0	0	0	0	0	0	0	0	0	0	0	0	0	0	0	0	0	0	0	0	0	0
2-Methyl-2-propenyl 2-propenoate (NVC00	0	0	0	0	0	0	0	0	0	0	0	0	0	0	0	0	0	0	0	0	0	0	0	0	0	0	0	0	0	0	0	0	0	0	0	0
Propanoic acid, 2-methyl-, 1-(1,1-dimet	54185.9	41309.5	0	55486.6	82489.7	59606.9	32988.5	56174.2	46008.5	40572	64473.4	-1	61903	51730.6	98863	21642.7	54769.7	56340.5	0	0	0	0	0	0	94829.3	0	44714.9	0	0	102907	21871.9	0	0	0	0	159602
Benzyl alcohol	-1	25166.9	-1	-1	0	11059.4	-1	-1	23231	0	-1	-1	17567.4	-1	25950.8	0	18329.5	0	27373.9	24595.7	35204.4	13844	19338.5	0	29122.8	38183	27315.1	27541.9	18238.1	-1	30809.5	48788.9	36893.6	26184.5	28270.6	18357.4
4-Methyl-5H-furan-2-one (10151504)	-1	0	0	-1	-1	-1	0	0	0	0	0	0	0	0	0	0	0	-1	0	0	0	0	0	0	0	0	0	0	0	0	0	0	0	0	0	0
(cis-2,6-Dimethyl-2,6-octadiene) (NVC00	0	0	0	0	0	0	0	0	0	0	0	0	0	0	0	0	0	0	0	0	0	0	0	0	0	0	0	0	0	0	0	0	0	0	0	0
dimethyl sulfone [Emmi 031418 ASDGR2]	29902.3	104619	0	0	0	0	68468.4	128925	98543.8	0	0	0	1317090	688740	486227	53182.1	63114.2	67833.4	1344920	3585280	2020810	265937	255217	97779.4	490340	210265	321105	37044.3	36230.3	36309	1428380	5366100	3651950	172605	42794.6	308800
1,5-cyclooctadiene, 1,6-dichloro [Emmi	0	0	0	0	0	0	168277	0	121766	113676	0	139297	185225	120868	253870	70778.4	223655	191391	290788	379640	219657	337487	204490	198505	332805	376480	314081	135813	261573	238785	380964	433168	347234	261273	277378	30159.4
phenylethyl alcohol [Emmi 031418 ASDGR2	24004.4	27486.8	24171.9	14446.3	-1	20257.4	102136	92381.3	92868.7	33122.8	0	31741.3	133330	-1	150244	20487.6	-1	-1	149839	110731	102867	46455.4	80817.1	45717.5	178300	322270	309434	102759	73773.7	72293	300229	266241	407309	125697	68289.8	83364.7
Butylated Hydroxytoluene	0	0	0	0	0	-1	0	0	-1	0	0	0	-1	0	-1	0	0	0	0	0	0	-1	0	0	0	0	18031.4	0	0	0	0	23145.4	16040.6	0	0	-1
(2-propenamide)	0	0	0	0	0	20606	0	0	0	0	-1	0	0	0	0	0	0	0	0	0	0	0	0	0	0	0	0	0	0	0	0	0	0	0	0	0
Heptanoic acid (11101510)	43427.7	42011.8	47644.8	55540.8	53486.2	46678.8	47791	58465.7	0	44935	217896	55154.4	55957.4	0	224912	51032.2	45738	51433.2	-1	-1	78686.2	66608.6	67572.9	47162.6	115678	68273.5	95529.8	98081.8	94123.7	115742	85935.4	160193	119243	86108.4	85649.8	179046
methenamine [Emmi 030918 NAC3]	37892.4	0	40933.7	-1	232952	353714	229134	199836	216127	181531	28657.4	234046	309982	685142	507729	224318	305555	272764	0	27230.5	63413.2	0	217125	113180	44436	0	0	0	0	0	0	145841	0	0	0	0
SOILA7 (1-Dodecanol)	22221.4	34620.6	26688.5	33855.4	42347.8	30997.7	30936.6	49597	49445.8	47320.6	98441.3	49880.9	25208.4	33252.2	219855	29357.8	33512.6	67655.3	128470	63794.6	73442.9	47260.1	74161.9	53464.3	102695	37704.2	32966.6	27649.2	21118.4	116432	46401.6	95946.5	99988.6	35095.2	48143.8	99640.8
Ethanol, 2,2'-oxybis- (10151504)	0	0	0	0	0	0	0	0	0	0	94076.4	0	0	0	0	0	0	0	0	0	0	0	0	0	58286.7	0	0	0	0	0	0	25554.5	0	0	0	0
Benzothiazole	295796	314889	288327	355669	442759	391821	315003	322360	370991	334925	372056	314758	409927	384305	426752	368448	363730	381481	363964	344146	346347	316762	324077	294064	344897	260644	248695	265655	236984	260271	225913	233451	214267	235934	258861	224658
Sulfurous acid, 2-ethylhexyl hexyl este	0	0	0	77239.3	0	0	0	54783.1	68251.7	54437.8	6326580	131884	208937	125857	7071660	0	241495	0	1196760	0	603016	0	0	118952	1538250	130151	60701.8	0	0	1079810	114959	318861	157520	1181300	198694	1185290
dodecyl acrylate [Emmi 030918 ASDWH1]	53407.2	-1	-1	54928.3	-1	-1	0	24749.8	22684.5	-1	71618.4	0	0	37911.9	181722	-1	85034.7	0	46969.3	0	174135	-1	29592.2	126987	175134	0	0	0	0	0	0	0	0	0	0	60142.7
Levoglucosenone	0	0	0	0	0	0	0	0	0	0	0	0	0	0	0	0	0	0	0	0	0	0	0	0	0	0	0	0	0	0	0	0	0	0	-1	0
(NVC032)(Glycerin)	0	0	0	0	0	0	0	0	0	0	0	0	0	0	0	0	0	0	0	0	0	0	0	0	0	0	0	0	0	0	0	0	0	0	0	0
(vinylfuran?)	221758	216221	212009	237476	258646	282174	249628	190200	195881	167261	322311	214746	1082090	169967	1033360	223800	271795	278902	4963160	5926770	1075940	1115300	1300380	918266	2493440	784592	3638200	1060670	626566	972629	576074	7198790	5060370	1057650	623757	1172540
(NVC012)	0	0	0	0	0	0	0	0	0	0	0	0	0	0	23340.2	0	0	0	0	0	0	0	0	0	0	0	0	0	0	0	0	0	0	0	0	0
3-Furancarboxylic acid, methyl ester (1	-1	-1	0	0	75087.6	29667.1	0	0	0	0	271648	0	0	18486.7	99118.1	0	21384.7	0	0	22060.1	0	0	0	0	0	-1	-1	0	0	0	-1	42265.3	27765.4	24054.7	41600.3	21344.4
2-nonanone, 9-hydroxy- [Emmi 031418 ASD	0	0	0	0	0	0	0	0	0	0	22723.7	0	0	0	49351.7	0	0	0	0	0	0	0	0	0	25897.2	0	0	0	0	0	0	0	0	-1	0	-1
(Methyl 9-dodecenoate, (E)-)(NVC025)	0	0	0	0	0	0	0	0	0	0	0	0	0	0	0	0	0	0	0	0	0	0	0	0	0	0	0	0	0	0	0	0	0	0	0	0
Vanillin	0	0	0	0	0	0	0	0	0	0	0	0	0	0	0	0	0	0	0	0	0	0	0	0	0	0	0	0	0	0	0	0	0	0	0	0
phenol, 4-ethyl-2-methoxy [Emmi 020318	0	0	0	0	0	0	-1	61981.9	33316.1	38942.4	-1	26523.8	35147.3	0	88710.7	0	81634.6	70123.2	0	45801.8	0	32709.6	114400	0	0	0	0	-1	0	0	0	0	0	0	0	0
(NVC013)(Ethyl 9-tetradecenoate)	0	0	0	0	0	0	0	0	0	0	0	0	0	0	0	0	0	0	0	0	0	0	0	0	0	0	0	0	0	0	0	0	0	0	0	0
1,2,3-propanetriol, diacetate [Emmi 041	0	0	0	0	0	0	0	0	0	0	39021.4	84396.5	0	0	77471.5	0	0	0	83296.1	99328.3	-1	33840.2	0	0	67905.9	0	0	0	0	0	0	239430	0	115713	161562	140243
triacetin [Emmi 042018 ASDRB1]	-1	0	-1	0	0	-1	0	0	-1	-1	0	0	0	0	0	0	-1	0	0	0	0	0	0	0	0	-1	34512.2	-1	-1	42282.2	-1	-1	-1	0	0	0
Octanoic Acid	-1	-1	-1	16366.6	-1	33252.2	-1	-1	-1	-1	289331	-1	-1	0	320762	-1	18292.7	27085	45961.7	37411.9	68231.5	-1	-1	-1	225921	72203	-1	54139.7	48358.8	106230	44849.3	97460.2	56602.6	105501	48510	172492
(NVC014)(triunsaturated)	0	0	0	0	0	0	0	0	0	0	0	0	0	0	0	0	0	0	0	0	0	0	0	0	0	0	0	0	0	0	0	0	0	0	0	0
(1-Octen-3-one)(NVC008)	0	0	0	0	0	0	0	0	0	0	0	0	0	0	0	0	0	0	0	0	0	0	0	0	0	0	0	0	0	0	0	0	0	0	0	0
p-Cresol (! 11101510)	76500.5	87089.5	83294.4	143494	241352	114700	89439.8	79282.6	86901.4	78232.6	88628.4	88613.3	2017500	89329	1052080	133385	127291	135657	9185570	11229600	4896550	1246450	1061610	800485	12886100	11526100	17487700	1217890	1334490	1896470	10761500	22955300	24502200	2961940	652463	2571910
phenol, 2-chloro-4-(1,1-dimethylethyl)	0	0	0	0	0	0	25987.9	14861.3	21302.4	17997.8	0	28135	25892.2	31844.4	34631.5	-1	27919.9	0	45282.7	66259.2	-1	34628.2	24405.4	23153.8	42446.9	66150	38048.6	17132.6	20777.7	-1	47854.8	73590.7	59369.5	20739	21678.7	17096.5
Cyclopropyl carbinol	364219	0	0	0	503100	289734	0	175873	0	112918	1608630	173012	258903	370595	823921	277253	412291	186292	0	154883	0	89113.3	0	107211	342181	133355	0	117447	112379	0	355332	251325	314474	0	258818	0
(NVC015)	0	0	0	0	0	0	0	0	0	0	0	0	0	0	0	0	0	0	0	0	0	0	0	0	0	0	0	0	0	0	0	0	0	0	0	0
NVC007	0	0	0	0	0	0	0	0	0	0	0	0	0	0	0	0	0	0	0	0	0	0	0	0	0	0	0	0	0	0	0	0	0	0	0	0
Ethanol, 2-[2-(ethenyloxy)ethoxy]- (bel	0	0	0	0	0	0	0	0	0	0	0	0	0	0	0	0	0	0	0	0	0	0	0	0	0	0	0	0	0	0	0	0	0	0	0	0
Nonanoic acid (11101510)	99157	23194.1	83245.7	124587	65399	67509.4	53348.8	41435.5	58643.4	40726.6	524625	103695	109146	65854.3	832369	22900.6	114017	34891.9	100098	123855	139277	33662.2	31651.2	87239	1162960	113826	48896.4	106420	112950	292268	90605.8	306011	189696	323612	86572.1	541563
Cycloheptane, methyl- (below 80 1015150	0	0	0	0	0	38924.7	0	-1	0	0	60265	0	0	0	127362	0	-1	0	42242.7	0	44271.7	0	0	0	152867	0	0	0	0	19059.7	0	0	0	405897	205833	134210
Eugenol	0	0	0	0	0	0	0	0	0	0	0	0	0	0	0	0	0	0	0	0	0	0	0	0	0	0	0	0	0	0	0	0	0	0	0	0
3,5-Dimethyldodecane (11021517)	294528	312176	165178	816729	188970	102194	102135	196338	335825	138345	8869000	1164500	1571070	825660	16189800	-1	1303900	43419.6	6975040	431239	3483420	84361.2	191869	1338440	10596900	1213330	331809	56233	41996.6	9599970	396887	2901240	2715140	8402470	1746150	7502050
Caprolactam	0	0	0	0	0	0	0	0	0	0	87198.7	0	0	0	-1	0	0	0	0	0	0	0	0	0	0	0	0	0	0	0	0	0	0	0	0	0
hexadecanoic acid, methyl ester [Emmi 0	0	0	0	0	0	0	0	0	0	0	173248	0	0	0	463620	0	0	0	128204	0	0	0	0	0	564680	0	0	0	0	166851	0	0	0	176259	0	174053
ketone, methyl 2-methyl-1,3-oxothiolan-	658984	190390	265907	130141	208752	183959	107667	205794	142466	137775	735805	207852	114057	93812.2	659232	123325	302284	84868.9	0	160689	186300	434581	268704	256207	794124	190169	428506	309446	248702	516697	257400	268611	242145	466482	162390	584203
Diisooctyl phthalate	0	0	0	0	0	0	0	0	0	0	0	0	0	0	0	0	0	0	0	0	0	0	0	0	0	0	0	0	0	0	0	0	0	0	0	0
Isopropyl Palmitate (less than 80 11101	0	0	0	0	0	0	0	0	0	0	70069.4	0	0	0	58881.7	0	0	0	-1	0	0	0	0	0	166118	0	0	0	0	25757.8	0	0	0	0	0	0
pentadecanoic acid [Emmi 032418 ASDWH2]	0	0	0	0	0	0	0	-1	0	0	0	0	0	0	0	108483	0	0	93999.3	0	0	0	0	162723	0	1363720	0	607619	-1	0	0	2165630	1676200	2208580	1759570	463143
Methyl anthranilate	0	0	0	0	0	0	0	0	0	0	0	0	0	0	0	0	0	0	0	0	0	0	0	0	0	0	0	0	0	0	0	0	0	0	0	0
4-Methyl-2-oxopentanenitrile (less than	0	0	0	0	0	0	0	0	0	0	426853	0	0	0	20124.7	0	0	0	0	0	0	0	0	0	0	0	0	0	0	0	0	0	0	0	0	0
n-Decanoic acid (! 10151504)	0	0	0	0	81885.7	0	63317.5	148652	0	76403	914826	81335.5	87042.5	71919.1	1014640	72916.1	101390	0	87196.6	62294.4	165731	80018.4	78004.1	47529.8	2108530	74993.5	0	99514.8	93094.8	204905	57106.6	204901	131476	162816	40704.7	333231
Cinnamyl alcohol	0	0	0	0	0	0	0	0	0	0	0	0	0	0	0	0	0	0	0	0	0	0	0	0	0	0	0	0	0	0	0	0	0	0	0	0
Methyl dihydro Jasmonate	0	0	0	0	0	0	0	0	0	0	0	0	0	0	0	0	0	0	0	0	0	0	0	0	0	0	0	0	0	0	0	0	0	0	0	0
(NVC033)	0	0	0	0	0	0	0	0	0	0	0	-1	0	0	0	0	0	0	0	0	-1	0	0	0	0	0	-1	0	0	0	0	0	0	0	-1	0
tricosane, 2-methyl- [Emmi 031418 ASDGR	1649970	2054440	1429070	144241	1647740	1048250	161365	1002730	1857060	582963	674722	874364	198591	4033900	757072	193677	136290	227547	476431	1246660	953261	276000	2439480	90861.1	999340	3672790	712468	586596	175631	413393	681466	18295.3	1138690	356381	3002500	415328
Methyl jasmonate	0	0	0	0	0	0	0	0	0	0	0	0	0	0	0	0	0	0	0	0	0	0	0	0	0	0	0	0	0	0	0	0	0	0	0	0
(E,E)-Farnesol	0	0	0	0	7190070	0	0	0	0	0	0	0	0	0	0	0	0	0	1818660	0	410980	415554	820282	2244910	0	0	2029540	675881	7516700	0	756024	0	6054610	0	0	3297700
Diethyl Phthalate	173814	154972	116211	128083	177699	153123	146772	253764	165295	147165	608836	165821	303559	304961	1007900	252534	236682	213360	356290	326413	288898	207235	252336	281191	0	210374	240350	146565	181981	0	192806	337359	329028	0	219097	0
docosane, 7-hexyl- [Emmi 031418 ASDGR2]	12391600	6126690	6904900	591414	5370100	4052680	3866260	9517210	11046800	2956480	325952	544281	569386	112122	838901	6085100	180799	8890590	4112420	7207900	11366500	7087850	8014290	7283770	2055720	1199130	2965590	4576360	4763330	4154020	2208540	512225	6812560	1915900	200015	2391580
dodecanoic acid [Emmi 031418 ASDGR2]	2585820	0	5056520	2837730	3624830	0	2061580	5057220	5601970	3761710	847891	1563910	3070920	2525720	1490690	3432720	3340080	5655650	19570100	12069200	8393520	3576730	16148900	29750200	3732340	41075900	14018600	37383600	21725400	4766070	4248630	51727700	32578100	47763900	43007400	26858600
1,4:3,6-Dianhydro-.alpha.-d-glucopyrano	0	0	0	0	0	0	0	0	0	0	44969.3	0	0	0	0	0	0	0	0	0	0	0	0	0	0	0	0	0	0	0	0	0	0	0	0	0
cyclohexadecane [Emmi 031418 ASDGR2]	0	1161080	0	0	135479	0	147338	363602	0	0	183056	-1	26883.4	0	297503	119508	-1	0	195129	11316.3	77028	0	0	0	931933	51419.1	313687	459636	180103	199172	121054	90121.9	109919	506750	520429	192339
Triethylene glycol (10151504)	0	0	0	0	0	0	0	0	0	0	0	0	0	0	0	0	0	0	0	0	0	0	0	0	0	0	0	0	0	0	0	0	0	0	0	0
1,2-benzenedicarboxylic acid, mono(2-et	1707870	735937	3178900	0	139416000	746899	1121580	1424880	1268670	7202400	1660750	884507	267742	13174900	555260	5418270	10082500	8772010	82216400	939060	14374600	16161200	39984500	55282800	656288	5363150	56139700	18160300	92263800	955434	16332000	14400400	101144000	20600100	26288700	65720700

## Sheet: Sheet3
Hewavitharana, S.S.; Klarer, E.; Muramoto, M.; Shennan, C.; Mazzola, M. Analysis of environmental variables and carbon input on soil microbiome, metabolome and disease control efficacy in strawberry attributable to anaerobic soil disinfestation. Microorganisms 2021, 9, X
Supplementary Material
2018-04-13 16:10:00
ASDRB1
	0ASDRB1	0ASDRB2	0ASDRB3	1ASDRB1	1ASDRB2	1ASDRB3	3ASDRB1	3ASDRB2	3ASDRB3	7ASDRB1	7ASDRB2	7ASDRB3	15ASDRB1	15ASDRB2	15ASDRB3	21ASDRB1	21ASDRB2	21ASDRB3
[Results Signal 1]
Pentane	383536	322449	303477	1849080	1907920	413789	3846380	3398050	3901040	4710720	17954900	9388540	6075260	6555080	21051700	7797470	6745230	11856500
carbon dioxide [Emmi 031418 ASDGR-P2]	16299700	15531600	15955700	12375300	12759500	8366740	14905000	15813300	14100000	27025000	9330860	11520500	15098400	12088000	36483100	14416500	10980800	6898270
Ethane, 2-chloro-1,1,1,2-tetrafluoro-	77328.7	73560.5	47144.2	210934	184803	0	242688	0	0	0	0	0	0	0	0	0	0	0
hexane [Emmi 022318 ASDGR-P1]	0	-1	0	0	343156	0	4468010	2271100	5099480	4396170	7455710	243782	6523770	492324	1642680	1565220	701574	0
Formaldehyde (less than 80 10151504)	0	83960.9	0	0	0	0	0	0	0	0	0	0	0	0	0	0	0	0
Ethyl Chloride	0	0	0	0	0	0	0	0	0	0	0	0	0	0	0	0	0	0
Cyclopropane, propyl-	0	0	0	0	0	0	0	0	0	391776	0	0	61431.7	0	0	0	0	0
Methanethiol (less than 80 11021517)	35674.8	0	106624	28361.1	0	0	0	0	0	0	0	0	0	0	386044	202737	369587	495294
n-Hexane	0	-1	0	0	343156	0	4468010	2271100	5099480	4396170	7455710	243782	6523770	492324	1642680	1565220	701574	0
1-Butene, 2,3-dimethyl-	0	0	0	0	0	0	0	0	0	364814	0	329170	85986.1	-1	879580	0	0	415521
1,3-Butadiene, 2-methyl-	333950	299408	195771	12026100	6615570	833145	7921940	7057300	6639230	4038480	6235200	3910110	1790410	3316220	3693450	4504510	4587290	2558700
Propane, 2-methoxy-2-methyl-	0	0	0	0	0	0	0	0	0	99669.4	0	0	0	0	0	0	0	0
Acetaldehyde	0	49632.2	580493	0	0	0	0	0	0	0	0	0	0	0	0	0	0	0
Heptane	134809	0	0	0	0	0	442198	952409	914392	2622100	2421820	0	562870	1605510	291458	160015	1780500	193417
Propane, 2-ethoxy-2-methyl-	0	0	0	0	0	0	0	0	0	0	0	0	0	0	0	0	0	0
Carbon disulfide	0	0	0	0	0	0	0	0	0	-1	0	1120580	445942	193583	0	433034	233491	0
Dimethyl sulfide	19150.2	0	0	237143	0	86677.9	7088070	59506	3437220	3059580	4549390	0	907295	40169900	16236500	59824500	4518930	48000200
Butane, 1-methoxy-	0	0	0	0	0	0	0	0	0	0	0	0	0	0	0	0	0	0
Dimethyl sulfide	0	0	0	0	0	0	0	5061090	0	0	0	489252	17003500	2641290	19705300	739304	31624500	0
(3-ethyl pentane)	0	0	0	0	0	0	0	0	0	0	0	0	0	0	0	0	0	0
borane-methyl sulfide complex [Emmi 022	19150.2	0	0	237143	0	86677.9	7088070	59506	3437220	3059580	4549390	0	907295	40169900	16236500	59824500	4518930	48000200
Propanal	0	0	0	0	0	0	0	80180.6	0	0	0	0	0	0	0	0	0	0
Furan	31273.6	0	0	0	0	0	0	0	0	0	0	0	0	0	0	0	0	0
Hexane, 2,4-dimethyl-	0	54477.7	-1	0	80697.7	0	2628720	2715550	4757800	3532170	4324590	0	1226570	787458	2419480	1631180	502205	0
Octane	0	110054	0	0	0	0	44357100	20431300	10121600	16695900	47904600	0	10142300	0	0	0	0	0
2,4 Hexadiene [! Emmi 031418 ASDGR2]	0	0	0	0	0	0	0	0	446696	266620	0	717477	0	0	0	0	0	0
2-Methylpropanal	0	15300.4	0	0	0	0	0	0	0	0	0	0	0	0	473645	0	0	0
Acetone	371550	518659	431645	378328	1872740	1606930	14023300	1906480	4402000	15990100	13013400	1355950	122634000	19087200	25187500	58611900	91274700	17611200
butane, 1-methoxy-3-methyl [Emmi 031418	0	0	0	0	0	0	0	0	0	0	0	0	0	0	0	0	0	0
Ethyl formate	0	0	0	0	0	0	0	0	0	0	0	0	0	0	0	0	0	0
Methyl acetate	0	0	0	0	0	0	0	0	0	0	0	0	0	0	0	0	0	0
1-Heptene, 3-methyl-	215503	287666	268247	154581	83932.5	56246.5	0	0	214966	616658	70232.7	46598.5	22340.1	150469	0	30691	185842	108436
2-Octene, (E)-	0	0	0	0	0	0	0	0	0	0	0	0	0	117496	0	0	58415.3	0
Tetrahydrofuran (check)	0	0	0	0	0	0	0	0	0	0	0	0	0	0	0	0	0	0
Ketene	0	0	0	0	0	0	0	0	0	0	0	0	0	0	0	0	0	0
Furan, tetrahydro-2,2,5,5-tetramethyl-	0	0	0	0	0	0	0	0	0	0	0	0	0	0	0	0	0	0
2 methyl furan [Emmi 031418 ASDGR2]	0	0	16912.1	0	-1	30198.6	466769	83312.8	108899	346516	0	257484	0	160155	230151	0	0	101732
Butanal	64196.2	81957.8	0	0	0	0	0	0	0	0	0	62753	0	0	0	0	0	0
Ethyl acetate	151345	121704	193558	43255.2	0	0	660635	575177	746360	0	0	167771	-1	0	0	0	0	0
Furan, 3-methyl-	0	0	0	152940	168004	48472.8	32437.9	0	1405630	1225180	652006	769848	771261	0	1402940	281988	718565	0
Nonane (10151504)	50481.2	99009.4	0	67432.2	331931	299957	1666890	1721240	349640	2962600	2731010	615470	1975920	4018350	130015	1245240	15700000	907343
Isopropyl acetate	0	0	0	0	0	0	0	0	0	0	0	0	0	0	0	0	2362220	0
Methanol	0	0	31020.2	0	0	0	0	0	0	0	0	0	0	0	0	0	0	0
2-Butanone	31575.4	71038.4	-1	0	82883.8	195505	2003330	1552730	1347140	7830180	6144160	205076	17315600	7792900	7406880	7609270	37017300	4254920
Sulfur dioxide (less than 80 11021517)	0	0	0	0	0	0	0	0	0	0	0	0	0	0	0	0	0	0
2-Propanol, 2-methyl-	0	0	0	0	76951.2	0	349996	433375	0	0	0	116027	0	0	0	0	0	0
Methyl propanoate	0	0	0	0	0	0	0	0	0	0	0	0	0	0	0	0	0	0
2-Methylbutanal	0	0	0	0	0	0	0	0	0	0	0	0	0	0	133850	0	0	0
propane [Emmi 030918 ASDWH1]	0	0	0	0	0	0	0	0	0	0	0	0	0	0	0	0	0	0
Butanal, 3-methyl-	26322.5	26434.4	0	0	0	0	0	77753.5	82534.7	0	0	0	13212200	1677280	0	0	2716420	0
Isopropanol	0	87660.7	0	0	0	413547	14895200	2974940	6178980	96291500	26701800	0	260322000	305106000	88670700	140901000	315140000	48035800
Ethanol	2588060	149423	2401230	0	0	0	38489600	24179000	24705000	0	6689330	1438450	0	0	427806	14661400	0	0
Benzene	1765090	1697730	1733870	0	2127230	1371260	1743690	2875820	2686010	2950290	2782700	2705970	0	1962160	1866350	0	0	911976
2-ethyl furan [Emmi 031418 ASDGR2]	86936.9	53804.4	78939.4	99421.3	85996.2	36933.5	339483	162390	142993	425021	317455	422180	380508	151180	378773	254453	548642	305473
1-methoxy-3-methyl-2-butene [Emmi 03121	0	0	0	0	0	0	0	0	1247670	0	0	0	0	0	0	0	0	0
(2-amino-3-butenoic acid)	0	0	0	0	0	1271770	64308.6	0	0	0	0	0	0	0	0	0	0	0
octane, 2,2,6-trimethyl [Emmi 041418 AS	0	0	0	264318	337112	368933	522803	691390	532184	543296	576749	429787	247600	501775	445058	201523	1009110	1276870
Propanoic acid, 1-methylethyl ester (RT	0	0	0	0	0	0	0	0	0	0	0	0	0	0	0	0	0	0
Ethyl propanoate	0	0	0	0	0	0	0	0	0	0	0	0	0	0	0	0	0	0
furan, 2,4-dimethyl [Emmi 031018 ASDWH-	0	0	0	0	0	0	0	0	0	0	0	0	0	0	0	0	0	0
1,1,3,3,5,5-hexamethyl-2-thia-1,3,5-tri	293232	266085	233061	200745	516843	682584	429222	257808	221113	168842	469303	324980	480094	192282	391759	86842.6	321976	302999
Ethyl 2-methylpropanoate	0	0	0	0	0	0	0	0	0	0	0	0	0	0	0	0	0	0
1,6-dimethylhelpta-1,3,5-triene [Emmi 0	0	0	0	-1	32424.6	0	66083.6	74703.3	-1	122854	52152.8	0	67726.8	0	-1	59138.4	0	0
Benzene, (trifluoromethyl)- (11101508)	0	0	0	93756.5	0	41799.6	0	0	0	34716.1	0	78078.4	0	0	0	0	0	0
Propyl acetate	0	0	0	0	0	0	0	0	0	0	0	0	0	0	0	0	0	0
2-Pentanone	-1	0	93252.3	0	0	0	265481	457488	627117	1133030	500364	0	36966500	6594320	60411200	19853800	35757600	26906000
Pentanal	238910	204222	242541	0	0	98270.6	0	0	0	0	0	0	0	0	0	17866300	0	0
octane, 2,3,3-trimethyl [Emmi 041418 AS	0	0	0	0	897936	1356110	1158360	1294690	556788	601836	1858280	1363330	741280	0	1124700	11335700	0	0
3-Buten-2-one, 3-methyl- (10151504)	0	0	0	0	0	0	0	0	0	0	0	0	0	0	0	0	0	0
Methyl butanoate	0	0	0	0	0	0	0	0	0	621814	0	0	0	0	0	0	0	0
heptane, 2,2,4,6,6-pentamethyl [Emmi 03	49199.8	54946.7	-1	920485	804947	1118840	1098450	1205730	5220460	1205310	1882140	1108310	989674	939888	1262240	1418940	2146830	1401200
2,3-Butanedione	361849	532990	14337.2	58556.4	27455.1	883547	1430210	868724	1233730	3299040	1830000	76572.7	0	0	31740800	43240000	81278900	7768470
3-Pentanone, 2-methyl-	232276	48844.2	0	0	0	0	0	0	0	0	0	0	0	0	0	4624850	0	0
(Acetonitrile)	0	171974	0	0	0	0	0	0	0	0	0	0	65251500	94778800	0	62788800	1482920	0
(GSV3)	0	0	0	0	0	0	0	0	0	0	0	0	0	0	0	0	0	0
Methyl Isobutyl Ketone (11021517)	-1	14968.8	0	0	0	0	0	0	0	0	0	0	253599	0	135631	571366	720678	0
2-Ethylbutanal	0	0	0	0	0	1078980	0	0	0	0	0	0	0	0	0	79062800	0	0
heptane, 2,2,4,6,6-pentamethyl [Emmi 04	49199.8	54946.7	-1	920485	804947	1118840	1098450	1205730	5220460	1205310	1882140	1108310	989674	939888	1262240	1418940	2146830	1401200
3-hexene, 1-methoxy-, (Z) [Emmi 031218	0	0	0	0	0	0	0	0	0	0	0	0	0	0	0	0	0	0
2-Pentanone, 3-methyl- (11101516)	0	0	0	0	0	0	0	0	0	0	0	0	0	0	0	0	0	0
Trichloromethane (10151504)	469350	401168	316109	3677060	865955	737069	3301730	6073740	934364	2193150	1094520	1523400	4978400	3503370	3012660	1453370	1990890	1367890
Methyl 2-methylbutanoate	0	0	0	0	0	0	0	0	0	0	0	0	0	0	0	0	0	0
octane, 6-ethyl-2-methyl [Emmi 041418 A	42699.1	50429.2	35637.3	2071620	1751630	2184650	3022640	3610770	3125450	3736780	2746100	2061650	2197450	1690530	1984310	2577070	3149760	1963450
Amylene hydrate	0	0	0	0	0	0	0	0	0	0	0	0	0	0	0	0	0	0
Butanoic acid, 3-methyl-, methyl ester	0	0	0	0	0	0	0	0	0	113471	68120.6	0	0	0	0	0	0	0
2-Methylpropyl acetate	0	0	0	0	0	0	0	0	0	0	0	0	0	0	0	0	0	0
(1-Penten-3-one)	0	0	0	0	0	0	0	0	0	0	0	0	0	0	0	0	0	0
a-Pinene	-1	64790.7	63375.3	227381	439691	467801	629426	630634	444533	535327	444146	228750	416042	447059	326749	318468	803164	371038
(NVC022)	595375	449480	67450.6	386831	588171	318751	142934	648518	0	0	0	276147	0	0	0	0	0	0
2-butanol (+/-) [Emmi 022318 ASDGR3]	0	0	0	0	0	0	72247.7	282167	383962	2250610	156887	0	7930130	4595630	765109	375822	22086100	314662
2-Butanol	0	0	0	0	0	0	72247.7	282167	383962	2250610	156887	0	7930130	4595630	765109	375822	22086100	314662
Z-1-methoxy-2-hexene [Emmi 031218 ASDHW	0	0	0	0	0	0	0	0	0	0	0	0	0	0	0	0	4306300	0
4,4-dimethyl-2-cyclopenten-1-one [Emmi	0	0	0	0	0	0	98305.8	0	0	252376	0	0	278078	405189	0	130128	11159.9	0
Nonane, 2,6-dimethyl-	0	0	0	27954.2	1603650	1742770	0	14386900	0	3161540	2323870	12169100	0	0	1498890	-1	437017	12901800
heptane, 5-ethyl-2,2,3-trimethyl [Emmi	101858	107228	77875.8	1505660	3083830	3205020	3199170	3403670	3320850	3794150	3177330	3785580	3592430	3707670	2807060	2461840	921651	2710840
Ispropyl butyrate (ISTD)	0	0	0	0	0	0	0	0	0	145360	0	0	231744	147422	93657.6	0	1078750	0
Ethyl butanoate	0	0	0	0	0	0	0	0	0	513781	0	0	0	0	0	0	0	0
2-butanol (R) [Emmi 031418 ASDGR3]	0	0	0	0	0	0	0	0	0	1629190	0	0	12610900	0	4824890	1016450	20746600	0
Toluene	532062	436403	440192	1402870	1739770	1755550	614220	3141920	3239380	3660830	3041650	2315640	2347210	2516030	2649550	1913470	3688540	1437650
1-Propanol	0	0	0	0	0	0	17413100	14388600	17359500	0	0	0	0	0	0	0	0	0
Methyl thiolacetate (! 11101510)	0	0	0	0	0	0	0	0	0	0	0	0	0	0	0	0	0	0
Propyl propanoate	0	0	0	0	0	0	0	0	0	0	0	0	0	0	0	0	0	0
Disulfide, dimethyl (! 11101510)	265384	41772.8	0	0	214941	0	15995600	6112460	8442720	8907830	678742	2532020	15303100	33646600	32360600	13914500	19582000	19014000
Ethyl 2-methylbutanoate	0	0	0	0	0	0	312411	0	331074	347545	68584.3	0	21656.9	170061	178490	0	0	0
(3-Methyl-7-oxo-1,7-dihydro-triazolo(4,	0	0	0	0	0	0	0	0	0	0	0	0	0	0	0	0	0	0
decane, 2,3,6, trimethyl [Emmi 031418 A	100674	109551	103100	2679740	3167160	3926670	2355230	4029510	2632610	3983050	6886860	4041500	2153410	2823710	3019690	10240700	14450600	6566500
Butanoic acid, 3-methyl-, ethyl ester (	0	0	0	0	0	0	179421	0	125941	164244	0	0	0	0	0	0	0	0
1,4-Dioxane	0	0	0	0	0	0	176965	0	0	0	0	0	0	0	0	0	0	0
camphene [Emmi 020218 ASDGR3]	0	0	0	0	0	0	32859.1	0	0	25924.1	0	0	0	0	0	0	0	0
Disulfide, dimethyl (! 11101510)	265384	41772.8	0	0	214941	0	15995600	6112460	8442720	8907830	678742	2532020	15303100	33646600	32360600	13914500	19582000	19014000
SOILA1	186527	170649	126047	125805	246495	332050	280081	190919	194425	352509	298435	160527	207145	144191	174384	139496	288002	159869
3-Hexanone, 4-methyl- (11101510)	0	0	0	144413	47561.7	189911	525624	0	557374	0	180717	145980	261809	143532	360324	2743360	0	0
SOILA2	80421.6	76470.2	26702.2	0	108312	146637	87445.7	26811.7	0	84767.3	93175.4	0	0	0	0	0	64761.3	0
Butyl acetate	0	0	0	0	0	0	0	0	0	0	0	0	0	0	0	0	0	0
nepthalene, 1-isocyano [Emmi 031418 ASD	19455.1	0	0	328980	430636	487156	571439	586552	609736	643776	589706	533402	339970	424766	476456	712493	852078	658332
decane, 3,7-dimethyl [Emmi 042018 ASDRB	0	0	0	1035770	1102190	1518290	899121	1608510	1970020	1754340	1096600	1054960	1148650	855713	1202400	3321680	3640120	2466190
2-Hexanone	0	0	0	0	0	0	0	0	0	0	0	0	0	0	0	629032	286895	0
Hexanal	806370	732020	1065110	544214	0	424113	1088290	57394.5	0	0	0	0	534519	577653	0	0	0	0
Undecane (10151504)	-1	-1	-1	38748.3	-1	104560	105779	70729.6	194821	116186	77070.2	70803.6	105948	131069	76438.3	182762	224875	270353
2-Butenoic acid, methyl ester, (E)- (11	0	0	0	0	0	0	0	0	0	0	0	0	0	0	0	0	0	0
2-Methyl-1-propanol	0	0	0	0	0	0	3599720	3080420	4989590	10886800	1523280	0	1349330	4552240	2023070	1116700	8821590	0
B-pinene [Emmi 020318 NAC-P2]	28421.4	-1	34726.1	91580.6	143065	144504	181722	228281	173255	201271	179711	94828.4	118804	126581	129069	87202.6	0	136487
(GSVA1) (3-Ethyl-2-methyl-1-pentene)	0	0	0	0	0	0	0	0	0	0	0	0	0	0	0	0	0	0
(3-Pentanol)	0	0	0	0	0	0	0	-1	96843.5	431080	0	0	276552	0	0	0	1032670	0
Butanoic acid, 1-methylpropyl ester (11	0	0	0	0	0	0	0	0	0	110910	0	0	0	0	0	0	397613	0
2-Methylbutyl acetate (HCV2)	92405	28217	131201	0	0	0	51257.7	0	0	395397	62346.7	0	52006800	64919600	31831.3	0	41833100	0
Ethylbenzene	190360	182650	175759	2359500	3164250	3877460	5413370	4960480	4786150	5658620	4508640	3849740	2842890	3112180	4077020	2312400	4156290	3407310
Propyl butanoate	0	0	0	0	0	0	0	0	0	287202	110582	0	0	0	134908	0	0	0
(R)-(-)-2-Pentanol	0	0	0	0	0	0	1469570	688649	975003	7214650	553620	0	286095000	336725000	117391000	180793000	252583000	85602200
2-butanol, 3-methyl-, (S)- [Emmi 031418	0	0	0	0	0	0	156830	156264	151781	166199	261054	0	0	0	0	0	0	0
p-xylene [Emmi 020318 ASDGR1]	273591	256128	247545	3430270	4272940	6123760	7152290	7392630	6914360	7818940	7251910	5484150	5139960	5200340	5571570	3423710	7065930	3132790
GSV40	0	0	0	0	0	0	0	0	0	2563490	0	0	0	0	0	0	0	0
(3-Hexen-2-one)(NVC004)	147899	111717	135533	0	0	0	0	0	0	0	0	0	0	0	0	99681.3	0	0
(E)-2-Pentenal	69165.8	0	0	53454.2	100178	70341.1	0	0	0	0	0	45030.7	0	0	0	260453	0	35246.4
Ethyl pentanoate	0	0	0	0	0	0	0	0	0	0	0	0	0	0	0	0	0	0
(Z)-3-Hexenal	0	0	0	386047	0	293012	389204	81962.2	0	137426	0	0	741377	364158	768214	809281	1603130	722563
Propyl 2-methylbutanoate	0	0	0	0	0	0	0	0	0	0	0	0	0	0	0	0	0	0
Butyl propanoate	-1	0	0	0	0	0	0	0	0	356510	0	0	0	0	0	0	0	0
3-Pentanol, 2-methyl- (11101510)	0	0	0	0	0	0	116521	133446	79818.5	424130	247774	40424.2	219877	296557	132457	0	563927	0
Methane, nitro-	0	0	0	0	0	0	165899	0	486615	0	0	0	0	0	0	0	0	0
1-Butanol	-1	0	131027	47910	72252.8	0	3117520	2686790	4386240	14913900	9116730	173263	8094400	3966020	6467470	738782	1406600	606705
(2-Methylpropyl butanoate)(NVC015)	0	0	0	0	0	0	70599.5	0	0	1796990	29797.8	0	205090	222926	33716.2	0	0	0
3-Heptanone	137390	-1	23456.2	33376.1	0	-1	-1	0	0	0	39447.9	-1	24707.8	27715.1	23088.2	229381	0	0
Acetic acid, 1-methylcyclopentyl ester	129575	104024	85805.2	59680.3	126080	88116.7	74702.3	67881	103527	93456.7	57169.5	84585.5	75086.6	118008	38299	153056	178804	144403
(1-Penten-3-ol)(NVC016)	31054.9	0	0	0	0	0	0	0	0	0	0	0	0	0	0	0	0	0
(2-butenenitrile)	0	0	71643.1	0	0	0	0	0	0	0	0	0	0	0	0	0	0	0
a-Myrcene	0	0	0	-1	-1	41479.6	202141	0	196074	0	-1	-1	0	94300.8	87224	0	0	0
2-Butenoic acid, 1-methylethyl ester (!	0	0	0	0	0	0	66979.9	0	0	421189	65279.8	0	279744	158700	128952	0	127745	0
(2-Propen-1-amine)(NVC017)	0	0	0	0	0	0	1327860	862791	1914270	41052.6	456459	0	0	0	619876	0	1070510	0
Ethyl (E)-2-butenoate	0	0	0	0	0	0	1673570	1467750	4411780	2387180	0	0	0	0	0	0	0	0
thiophene, 3-ethyl [Emmi 031218 ASDWH1]	0	0	0	0	0	0	0	0	0	0	0	-1	0	0	0	0	0	0
(isopropylisothiocyanite)	0	0	0	0	0	0	0	0	0	0	0	0	0	0	0	0	0	0
Pentyl acetate	149456	25562.9	113421	0	0	0	0	0	0	0	0	0	0	0	0	0	0	0
Heptanal (11101508)	674288	570979	531526	442096	614866	543305	1298580	2034070	2098220	498416	426197	392020	427489	647952	447448	742228	805128	498835
Pyridine (11101508)	0	0	0	29536.1	0	0	-1	0	0	0	0	0	0	0	0	0	0	0
a-Terpinene	0	0	0	0	0	0	0	0	0	-1	0	0	0	0	0	0	0	0
(2,4-pentadienenitrile)	154526	171153	190414	229829	363247	183984	157737	134696	150642	223872	226261	272640	359001	315811	207584	227170	325685	360090
o-xylene [Emmi 030918 NAC3]	0	159199	142546	4727510	5807860	7348590	9631590	8631650	9137630	10940900	9609850	7544050	6179310	6665400	7680890	5024750	9165190	4199790
(Ketene/hydrogen azide)	0	0	0	0	0	0	0	0	0	2322770	0	0	0	0	0	0	0	0
2-Heptanone	524808	425212	585123	184630	173041	357894	597382	0	0	1224200	1236240	0	1157310	2519920	1707290	11955700	4707510	1802780
Cyclotrisiloxane, 2,4,6-triethenyl-2,4,	-1	0	0	-1	0	0	-1	0	0	-1	-1	0	0	0	0	0	0	0
Propanoic acid, 2-methyl-, 3-methylbuty	0	0	0	0	0	0	0	0	0	0	0	0	-1	-1	91203.8	0	678056	0
hexenal, 2-methyl [Emmi 021718 ASDGR2]	1281260	322254	374954	0	156989	243534	147603	163049	181201	0	118714	120975	61029.4	0	62199.4	1676340	1417730	1441890
Dodecane (10151504)	150066	102072	119497	422804	395891	585314	821686	655697	1273400	1128930	744881	180854	574704	794603	477809	6154640	5610360	5549530
Heptanal	674288	570979	531526	442096	614866	543305	1298580	2034070	2098220	498416	426197	392020	427489	647952	447448	742228	805128	498835
1,3-Diisopropoxy-1,3-dimethyl-1,3-disil	49518.8	44563.2	43612.9	0	0	-1	0	0	118430	0	0	0	73808.1	63908.7	0	0	0	96769.7
Methyl hexanoate	0	0	0	0	0	0	0	0	0	0	0	0	0	0	0	0	0	0
limonene? (10151504)	243506	316510	352600	463588	498321	511068	807531	793970	912063	1489460	1287570	1410580	446028	526588	496400	1550540	1329440	1346560
2-Methylbutyl propanoate	0	0	0	0	0	0	0	0	0	0	0	0	0	0	231854	0	0	0
(2-Hexenal)(NVC019)	-1	0	0	-1	0	18711.9	30397.9	0	0	0	51495.4	0	0	0	0	-1	158916	-1
(Dimethyl peroxide) (NVC006)	0	0	0	0	0	0	0	0	0	0	0	0	0	0	0	0	0	0
benzene, propyl [Emmi 041418 ASDRB2]	-1	-1	-1	33459.8	43390.9	47189.8	0	82096.8	0	61195.7	58784.1	40890.1	47765.8	47578.4	49722.4	0	65382.2	33607.2
2-Methyl-1-butanol	0	0	0	-1	0	-1	6097810	3691800	8129410	9736300	1768280	0	3011280	2605570	2759460	654223	3427870	375742
3-Methyl-1-butanol	0	0	0	0	0	0	3401570	2407860	4910780	4838260	1238730	0	1504760	376972	3424240	0	0	0
(o-Methoxy-benzoyl)-tris(trimethylsilyl	-1	-1	0	-1	0	-1	-1	-1	-1	20559.8	-1	-1	0	0	0	0	0	-1
2-Hexenal, (E)-	0	0	0	0	0	0	0	0	0	0	0	0	0	0	0	0	97122.5	0
(isothiocyanatocyclopropane)	0	0	0	0	0	0	0	0	0	0	0	0	0	0	0	0	136599	0
4-Octanone (10151504)	0	116590	-1	0	0	0	0	0	0	0	0	0	0	0	0	0	0	0
2-Hexanol	0	0	0	0	0	0	0	0	0	0	0	0	551477	329720	0	542753	1726700	357591
benzene, 1-ethyl-2-methyl [Emmi 020318	136976	102939	81997.4	463513	554095	717882	669697	813025	1008900	834508	834609	491651	570793	652391	666881	456903	471448	408491
Butyl butanoate	14864.6	0	-1	0	0	0	0	0	16672.3	1785510	348481	0	436570	177420	175127	0	168291	0
(isooctanol)	35816.5	45867.4	0	498715	223716	377152	449771	387454	734720	513060	314004	57415.7	283814	290986	259118	984332	1451940	1078980
1-Butanol, 3-methyl-, nitrate	0	0	0	0	0	0	0	0	0	0	0	0	0	0	0	0	0	0
Furan, 2-pentyl-	278507	230331	452812	830762	738289	671575	1133610	871201	764704	600697	842389	120419	754906	674449	1056920	393920	841838	355420
Decane, 3-ethyl-3-methyl-	0	0	0	33406.8	34031	47961.9	26587.3	29526.9	24252.5	0	62865.7	-1	43616.2	35868.6	448498	251972	339577	183582
Butyl 2-methylbutanoate	0	0	-1	0	0	0	0	0	0	175602	44126.9	0	259792	135778	219798	0	0	0
2-heptanone, 6-methyl [Emmi 031418 ASDG	210922	107787	217909	0	0	0	279313	286956	327234	425776	452673	0	344434	416039	327768	528903	0	252944
Ethyl hexanoate	-1	0	0	0	0	0	0	0	0	0	0	0	0	0	0	0	0	0
3,5 dimethyl-4-octanone [Emmi 031418 AS	0	0	0	0	0	0	0	0	0	0	0	0	0	0	0	0	0	0
Ethyl tiglate	0	0	0	0	0	0	0	0	0	0	0	0	0	0	0	0	0	0
Octane, 1-chloro- (101515504)	81175.9	-1	-1	126863	86842.1	135883	97721.6	0	0	179617	132643	146385	107162	320601	119799	91479.7	127282	96484.8
Pentyl propanoate (HCV13)	0	0	0	0	0	0	0	0	0	0	0	0	0	0	0	0	0	0
SOILA5	0	-1	0	0	0	-1	-1	-1	0	-1	-1	-1	-1	-1	0	0	0	0
1-Pentanol	42146.2	32869.2	61182.2	28067	34903.7	47896.8	430681	546126	750770	0	0	24649	87810.4	72658.3	168922	0	0	0
3-Octanone	140928	0	0	0	0	0	0	0	0	0	524247	0	333878	334559	458183	0	816072	0
Prenyl acetate	0	0	0	0	0	0	0	0	0	88153	0	0	0	0	125347	0	0	0
1,3,5,7-Cyclooctatetraene	242829	167136	197363	457383	511841	326322	575124	521240	629493	559143	410988	260009	341942	394098	371228	359622	421660	313219
(1-isocyano-3-methyl-benzene)	0	0	0	0	0	0	0	0	0	0	0	0	0	0	0	0	0	0
(isothiocyanatobutane)	0	0	0	0	0	0	0	0	0	0	0	0	0	0	0	0	0	0
Acetic acid, ethoxyhydroxy-, ethyl este	0	0	0	0	0	0	0	0	0	0	0	0	0	0	0	0	0	0
thiocyanic acid, methyl ester [Emmi 031	0	0	0	0	0	0	-1	0	0	0	0	0	19962.6	24669.4	25808.2	21819.8	0	0
Acetic acid, mercapto-	0	0	0	0	0	0	0	0	0	0	0	0	0	0	92897.2	0	0	0
2-methylbutyl butanoate	-1	0	0	0	0	0	83299.4	18659.8	99682.8	780778	72355.9	0	96457.2	88693.9	77333.8	0	0	0
(NVC027)(GSV5)	0	0	0	0	0	0	0	0	30802.8	115139	0	0	0	0	0	0	0	0
butanoic acid, 2-methyl, 3-methylbutyl	0	0	0	0	0	0	30898.7	236579	369649	83322.9	28971.6	0	53203.9	94895.5	110831	0	0	0
Hexyl acetate (HCV30)	74896.1	22963.9	50611.7	-1	18105.4	-1	0	0	-1	0	0	0	0	0	0	0	0	98197.7
benzene, 1,3,5-trimethyl [Emmi 020218 A	125012	88478.9	120118	535009	577169	665396	960765	933513	1239890	923042	870917	521944	594811	661488	716135	550490	1052690	571805
(NVC028)(GSV6)	0	0	0	0	0	0	0	0	0	0	0	0	0	0	0	0	0	0
Cyclohexane, isocyanato- (10151504)	0	0	0	-1	0	-1	52618.5	0	-1	0	0	0	0	0	0	131629	164766	127571
2-Methylbutyl 2-methylbutanoate	0	0	0	0	0	0	0	0	0	0	0	0	0	-1	0	0	0	0
2,4-dithiapentane [Emmi 031418 ASDGR2]	0	0	0	0	0	0	0	63769.4	65709.8	0	0	-1	67426.8	41096.2	0	49555	0	86698.1
2-Octanone	257438	138382	74200.6	59767	0	189055	366463	1536780	447821	491857	523438	134336	508493	716850	439446	1810160	318971	475841
Acetoin	0	358597	375687	120962	0	618250	2366700	1745240	8135050	678837	648568	68446.6	0	0	0	0	0	0
Cyclohexanone (10151504)	0	0	0	0	0	0	0	0	0	0	0	0	0	0	0	393844	431262	316687
Octanal	851143	646009	620285	606173	677373	839170	756058	814239	886750	530472	406450	609425	632466	1024790	606593	729025	761583	680183
(1-Hepten-3-one)(NVC023)	65691.4	57247.7	55100.6	0	0	0	104919	118272	135658	136722	0	0	111690	87879.1	126460	0	0	0
2-Propanone, 1-hydroxy-	291199	362450	476960	783122	1076870	367122	205071	231378	241592	720626	398325	784392	441131	206087	210931	251598	182354	376851
Acetaldehyde, hydroxy- (11101510)	0	500384	462938	1715920	1486360	0	299520	343669	0	1017430	465599	1041220	0	193069	323968	0	0	0
Arsenous acid, tris(trimethylsilyl) est	94222.8	92099.3	77980.6	85239.8	92015.3	97008.2	125427	120481	99981.8	114531	101815	82199	0	92952.7	97702.1	104703	116854	78823.9
(Pentyl butanoate)(NVC019)	0	0	0	0	0	0	0	0	0	0	0	0	0	0	0	0	0	0
2-Heptanol	0	0	0	0	0	0	240892	222598	365217	1256040	404381	0	695549	1118330	1133780	2340080	1156980	846870
cyclohexanone, 2,2,6-trimethyl- [Emmi 0	0	0	0	0	0	0	86999.5	81242.5	82327.9	90662.7	58822.1	36675.8	0	0	64476.7	0	0	0
2-Isopropyl-5-methyl-1-heptanol	32593.7	-1	0	-1	39987.3	17848	21619.9	46744.3	27688.1	-1	-1	13746.2	-1	-1	-1	79837	231094	120374
2-Penten-1-ol, (Z)-	0	0	0	0	0	0	0	0	0	0	0	0	0	0	0	0	0	0
Propyl hexanoate	0	0	0	0	0	0	0	0	0	0	0	0	0	0	0	0	0	0
a-Methylstyrene (10151504)	59097.4	42324.2	58685.8	59396.4	76534.1	48153.8	43458.2	52402.6	75190.1	51649.9	40561.9	42225.1	35495	38809.7	31676.4	40081.4	0	22799.7
6-octen-2-one [Emmi 031418 ASDGR2]	48921.6	0	0	0	0	36499.7	0	0	0	0	0	0	0	0	0	0	0	251151
2-Heptenal, (E)-	55132.6	36119.7	51017.2	44035.8	0	0	0	11509.5	0	0	0	0	-1	0	0	137652	80325.6	104360
Pentyl 2-methylbutanoate (GSV17)	0	0	0	0	0	0	0	0	0	0	0	0	0	0	0	0	0	0
(E)-2-Hexenyl acetate	0	0	0	0	0	0	0	0	0	0	0	0	0	0	0	0	0	0
2-hexanol, 3-methyl [Emmi 031418 ASDGR3	0	0	0	0	0	0	0	0	0	0	0	0	0	0	0	0	0	0
6-Methyl-5-hepten-2-one,	238375	249320	323791	196886	226323	177625	199102	155051	319386	590325	411498	786265	383947	329894	302126	650931	557678	399192
Hexyl propanoate	0	0	0	0	0	0	0	0	0	0	0	0	0	0	0	0	0	0
Z-2-dodecenol [Emmi 030918 ASDWH1]	35804.2	30278.6	28190.4	30770.9	41786.6	39214.6	19714.5	25312.6	32170	38520.7	49403.8	56790.7	62413.7	83586.7	55655	96069.1	50218.6	65175.6
Hexyl 2-methylpropanoate	0	0	0	0	0	0	0	0	0	0	0	0	0	0	0	0	0	0
(AITC2)	0	0	0	0	0	0	0	0	0	0	0	0	0	0	0	0	0	0
Anisole	0	0	0	0	0	0	0	0	0	0	0	26369.3	0	0	0	0	0	0
2-Butenoic acid, butyl ester (11101510)	0	0	0	0	0	0	0	0	0	0	0	0	0	0	0	0	0	0
2-isopropylpyrazine [Emmi 031218 ASDWH3	0	0	0	0	0	0	0	24467.5	0	0	0	0	0	0	0	0	0	0
6-butyl-1,4-cycloheptadiene [Emmi 03121	0	0	0	0	0	0	0	0	0	0	-1	0	0	0	-1	0	0	0
1-Hexanol	125904	70699.4	145562	47108.9	42621.6	42522.5	1475940	1747360	3505320	293237	175545	49578.5	210166	155733	237508	0	0	0
cyclohexanol, 2,3-dimethyl- [Emmi 03141	0	0	0	0	0	0	0	0	0	0	0	0	0	0	0	0	0	0
2-Cyclopenten-1-one (less than 80 10151	82525	70654.1	60779.1	105366	104182	0	0	0	59680.3	79220.4	0	87368.4	0	0	0	0	0	0
3-Hexanol, 2-methyl- (less than 80 1102	0	0	0	0	0	0	0	0	0	0	0	0	0	0	0	0	0	0
2-Hydroxy-3-pentanone	0	0	0	0	0	0	0	0	0	0	0	0	0	0	0	0	0	0
3-Hexen-1-ol, (E)-	0	0	0	0	0	0	0	0	0	0	0	0	0	0	0	0	0	0
Ethanol, 2-(vinyloxy)-	0	0	0	-1	20020.6	-1	0	0	0	0	0	12507.6	19204.1	-1	0	0	0	0
Cyclohexasiloxane, dodecamethyl-	387688	248674	287284	237176	274525	214816	1138590	1090230	969975	4500550	4328630	4843840	2168420	715303	718021	1231200	874670	1655650
(4-octanol?) (10151504)	0	0	0	0	0	0	0	0	0	0	0	0	0	0	0	0	0	0
6-[(Z)-1-butenyl]-1,4-cycloheptadiene [	0	0	0	0	0	0	0	0	0	-1	0	17297.7	0	0	0	0	0	0
SOILB1	0	0	0	0	0	0	0	0	0	0	0	0	0	0	0	0	0	0
acetic acid, 2-ethylhexyl ester [Emmi 0	305441	217817	302704	44583.8	34492.1	46520	0	0	0	0	52315.2	31117	0	0	0	0	0	0
Dimethyl trisulfide (! 11101510)	0	0	0	0	0	0	414533	259706	268267	682255	0	0	3030900	4575680	4929330	1720910	3620380	914258
3-Hexen-1-ol, (Z)-	0	0	0	0	0	0	0	0	0	0	0	0	0	0	0	0	0	0
nonanal [Emmi 022318 ASDGR3]	5335080	4443400	3897360	3795640	4882970	5390780	5458160	5946560	6498020	5420300	4602500	7154960	6813150	7372130	5597250	6444260	6833090	6706480
2-Nonanone	36475.2	59697.9	31750.5	94331.4	58172.9	87269.5	649477	417913	335007	1120620	157398	78229.5	864789	865925	1323940	668785	1171490	356306
(3-Octanol)(NVC020)	127466	65646	0	0	46312.6	0	0	112409	59192.4	0	0	0	0	0	0	0	0	0
(Pentamethylethanol)(NVC021)	0	0	0	0	0	0	29801.5	0	0	89656.6	128555	22949.2	76364.9	0	20165	0	395711	0
(NVC009)	0	0	0	-1	0	-1	0	0	0	0	0	0	0	0	0	0	0	0
Pentane, 1-nitro-	0	0	0	0	0	0	0	0	0	0	0	0	0	0	0	0	0	0
Ethanol, 2-butoxy- (less than 70 101515	44222.6	36706.3	-1	-1	18861.4	0	0	0	0	354396	332035	428155	52933.4	53734.8	46450.3	2367590	2211260	1925510
2-cyclohexen-1-one, 3,5,5-trimethyl [Em	0	0	0	0	0	0	23508.3	0	0	28593.6	0	0	0	0	0	0	0	0
2-Hexen-1-ol, (E)-	0	0	0	0	0	0	0	0	0	0	0	0	0	0	0	0	0	0
2,4-Hexadienal, (E,E)-	0	0	0	0	0	0	0	0	0	0	0	0	0	0	0	0	0	0
5-Hexen-1-ol (ISTD)	0	0	0	0	0	0	0	0	0	0	0	0	0	0	0	0	0	0
Dodecane, 4,6-dimethyl-	17830.7	0	43909.4	0	0	-1	22907.6	183102	32371.4	0	0	0	0	-1	0	1463290	1667490	1127680
4-Hexen-1-ol, (E)-	0	0	0	0	0	0	0	0	0	0	0	0	0	0	0	0	0	0
2-octanol (R) [Emmi 031418 ASDGR3]	0	0	0	0	0	0	-1	-1	-1	0	23797.2	0	0	23781.7	30139.2	0	54742.8	0
N,N-Dimethylacetamide	0	0	0	0	0	0	0	0	0	0	0	0	0	0	0	0	0	0
2-Hexen-1-ol, (Z)-	0	0	0	0	0	0	0	0	0	0	0	0	0	0	0	0	0	0
Butyl hexanoate	17174.6	-1	-1	0	0	0	-1	0	0	0	0	0	0	0	0	0	0	0
Hexyl butanoate	0	0	0	0	0	0	0	0	0	68253.4	0	0	0	0	0	0	0	0
2-Octanol	0	0	0	0	0	0	0	0	26713.7	79385	0	0	32491.7	42378	0	52447.3	93224.9	0
Benzene, 1,3-bis(1,1-dimethylethyl)-	299363	289417	362344	296231	436750	222279	367443	310486	360516	365156	339389	455188	321276	240183	242340	266584	344245	291040
Cyclotetrasiloxane, octamethyl-	73599.1	61637.5	63122.6	53340	55072.1	62454	63868.6	67881	61281.4	70402.1	75752.9	56822.6	42159.6	53555	61207.4	60937	33798.2	0
Hexyl 2-methylbutanoate	0	0	0	0	0	0	0	0	0	0	0	0	0	0	0	0	0	0
Acetic acid	1702320	1756090	1871860	6074120	5242430	4325680	5278260	3541700	4977650	26792000	7805960	6037540	22010800	17399200	14645300	9713360	22269600	11060400
benzene, 1-methoxy-4-methyl [Emmi 02231	0	0	0	0	0	0	0	0	0	0	189689	-1	0	0	62645.5	0	125965	0
2-Octenal, (E)-	86567	44854.8	60571.4	69417	67345.1	0	16322.1	41650.6	-1	55618.5	0	66763.2	0	-1	38887	290887	300278	321940
Benzene, 1,4-dichloro-	11734500	7180410	9513710	8354670	9419780	8434610	25566700	21112300	20102500	10396400	10534600	4439770	5744660	6822750	6630290	4539770	10852300	3701690
Ethyl octanoate	0	0	0	0	0	0	0	0	0	0	0	0	0	0	0	0	0	0
(2-propenyl-thiocyanic acid)	0	0	0	0	0	0	0	0	0	0	0	0	0	0	0	0	0	0
1-octen-3-ol [Emmi 031418 ASDGR2]	-1	-1	-1	0	0	0	14891.5	30930.5	78644.2	0	0	0	-1	0	31073.3	16205.3	0	0
((Z)-Linaloloxide) (GSV15)	0	0	0	0	0	0	0	0	0	0	0	0	0	0	0	0	0	0
Propanoic acid, 2-oxo-, methyl ester (1	-1	-1	-1	37380	-1	-1	0	0	0	-1	-1	-1	-1	-1	0	0	0	0
Benzene, 1,4-dichloro-	11734500	7180410	9513710	8354670	9419780	8434610	25566700	21112300	20102500	10396400	10534600	4439770	5744660	6822750	6630290	4539770	10852300	3701690
dl-6-methyl-5-hepten-2-ol [Emmi 031418	0	0	0	0	0	0	0	0	0	0	0	-1	0	0	0	0	0	0
(1-Heptanol) (NVC001)	55340.3	-1	32778.5	43437.8	35340.8	33556.9	6735180	14972700	25520500	3214850	1021500	80525.6	110304	220179	619075	25726.9	0	77823.4
glycidol [Emmi 020218 ASDGR1]	196647	204191	90602.4	160254	179508	142452	123414	114028	0	153591	41194.7	127593	133414	0	0	0	0	0
2-Hexanone, 3,3-dimethyl- (10151504)	51342.5	81404.4	31654.4	66726.2	83287.7	72050.2	26538.8	78587	69876.2	25108.2	65548.6	59209.9	29032.5	93544.1	93513.8	111080	26614.6	79635.4
6-Methyl-5-hepten-2-ol,	0	0	0	0	0	0	0	0	0	142928	0	0	53753.3	0	0	0	0	0
2-Methylbutyl hexanoate	0	0	0	0	0	0	0	0	0	0	0	0	0	0	0	0	0	0
(3-Furaldehyde)(NVC029)	0	0	0	0	0	0	0	0	0	0	0	0	0	0	0	0	0	0
Furfural	265558	271256	310891	330916	350435	221446	108158	96910.8	115982	195866	118647	265097	140914	117027	138135	198717	132874	186912
3-Isopropoxy-1,1,1,7,7,7-hexamethyl-3,5	2714890	2316590	2745810	1369790	1582640	870096	3220950	3046140	2598120	4345980	3767010	3496770	3567840	2196320	2348200	3485970	2473710	3688020
ethane-1,1-diole dipropanoate [Emmi 050	0	0	0	0	0	0	0	0	0	0	0	0	0	0	0	2495460	2886670	2603050
2-Ethyl-1-hexanol	861568	351071	505556	264074	446107	571633	541481	422438	798319	719892	725360	233471	662022	905439	1346420	13075300	13691000	12105100
Cyclohexanecarbonitrile, 1-(1-piperidin	0	0	0	0	0	0	252595	94299.3	141977	36448.4	0	0	0	0	44948.4	0	0	0
3-Hydroxy-4-methoxybenzaldehyde, tert-b	42680.4	34099	37899.1	35397.6	37450.6	37515	40885.1	31234.6	29106.5	24835.4	17230.1	27009.4	30965.7	40745	29008.6	50173.2	43019.8	42828.2
Decanal	2085710	1850150	1501750	1831770	1666820	1692680	1791370	1972300	2161590	2631590	2650010	3479200	3293680	3869550	3892450	3449310	2572930	2874670
Benzaldehyde, 2,5-bis[(trimethylsilyl)o	187769	103814	107740	92374.8	133162	105627	130785	125659	141752	140823	113200	100400	91345	106144	118685	266476	278092	191549
Pentyl hexanoate	0	0	0	0	0	0	0	0	0	0	0	0	0	0	0	0	0	0
4-ethyl-2-octanol [Emmi 031418 ASDGR3]	0	0	0	0	0	-1	48993.8	34609.7	14246.7	300209	38903.8	0	241441	323138	589487	158906	370889	59884.9
SOILA6	0	-1	15005.8	0	22797.6	0	0	0	-1	0	0	-1	0	0	0	221251	232329	251518
Propanoic acid (! 11101510)	216513	247437	157776	278126	469474	194200	299949	312485	303628	1963930	574135	253189	1354900	1448390	949045	5753230	9397970	8068480
Benzaldehyde	677179	502775	545777	384848	533859	476080	398832	414076	417092	432855	369706	413342	410599	508227	487862	573877	600321	516993
(DL-2,3-Butanediol)(NVC010)	0	0	0	0	0	0	0	0	0	0	0	0	0	0	0	0	0	0
2-Nonenal, (E)-	47265.1	45724.6	43278.5	37460.6	40435.9	42640.1	45715.1	41857.2	54003.6	34252.7	37737.8	41660.6	39338	39407.8	26184.9	63748.6	105827	59977.7
linalool	0	0	0	0	0	0	0	0	-1	0	0	0	0	0	0	-1	-1	0
benzene, 1-(chloromethyl)-2-methyl [Emm	0	0	0	220045	177697	292102	368286	316159	654798	470476	425111	205810	182784	195960	208974	0	257431	79291
cyclodecene, 1-methyl [Emmi 031218 ASDW	28885.9	-1	20561.5	22135.7	0	-1	29866.9	29917.4	31105.2	27027.8	-1	0	0	33657.4	30987.5	0	0	0
1-Octanol	217690	172748	179605	137132	162390	181739	245851	267529	282678	177976	0	201742	155980	277897	131481	77775.3	211422	90361.2
4-penten-1-ol, 2-methylene [Emmi 031418	125831	0	85507.1	0	0	57144.3	0	0	0	0	0	44963.7	0	0	77637.8	0	0	0
2-Methylpropanoic acid	0	0	0	0	0	0	283628	0	262559	3136300	954964	50011.9	1683100	2123850	1563560	884715	4090880	672717
Propanoic acid, 2-hydroxy-, ethyl ester	0	0	0	0	0	0	0	0	0	0	0	0	0	0	0	0	0	0
Dimethyl Sulfoxide (11021517)	30918.7	51915	27763.7	55470.2	60258.1	51644.9	217864	173481	205504	234187	143924	63678.5	387902	559675	715117	423123	798674	537075
2,4,4-trimethylbut-2-enolide [Emmi 0314	0	0	0	0	0	0	0	0	0	0	0	0	0	0	0	0	0	0
isobornyl acetate [Emmi 020218 ASDGR3]	31151.7	-1	34497.1	-1	0	17668.6	-1	0	0	-1	-1	0	0	0	0	0	0	0
Hexadecane (10151504)	65411	36338.3	24623.4	39877.3	57036	-1	32099.5	-1	23971.2	53143.4	31741.1	20536.3	34613	18610.2	40793.8	694179	376053	351301
Methyl decanoate	0	0	0	0	0	0	0	0	0	0	0	0	0	0	0	0	0	0
1-propene, 2-(1-methylethoxy) [Emmi 031	28495	26310.7	25974.7	-1	30436.6	14411.8	26329.8	33359.8	42071.1	33683.2	37642.9	0	43619.5	45286.1	50189.4	69764.1	96326.2	87329.8
Undecanal (10151504)	112363	90106.8	90913.2	83601.8	88892.2	86827.4	92252.2	116456	113897	123510	127762	143921	140582	147176	179656	124732	155652	103019
(ethylene/nitric oxide)	-1	0	0	0	0	0	0	0	0	-1	0	0	0	0	0	0	0	0
Benzonitrile (10151504)	100012	89518.8	86515	61160.4	97529	90852.7	93789.4	96539.5	95054.4	85113.8	91489.4	102075	79101.1	94125.4	100926	102507	110475	99155.3
Butanoic acid (! 11101510)	150894	155274	126446	252726	360743	208218	920961	707542	2860140	42165900	10334400	229925	22012700	24414500	22290900	2469160	20359200	2849980
Hexyl hexanoate	0	-1	15916.3	0	0	-1	0	0	0	0	0	-1	0	0	0	0	0	0
Pentanoic acid, octyl ester	0	0	0	0	0	0	0	0	0	0	0	0	0	0	0	687962	709752	675938
Butyl octanoate	0	0	0	0	0	0	0	0	0	0	0	0	0	0	0	0	0	0
2-propenoic acid [Emmi 031418 ASDGR2]	-1	36235.3	0	35116.4	67477.2	34707.7	24827	0	38776.3	0	54623.5	64073.5	0	71730.2	53184.6	0	0	0
(1,2-Ethanediol) not likely	245407	263960	339040	451226	499215	358948	0	0	167396	0	0	344818	0	0	0	243421	0	114495
Cyclooctasiloxane, hexadecamethyl-	2148890	1844650	2178930	1305410	1888900	1319820	1402010	1270750	1205970	2043720	2224160	1946840	1866990	1303680	1185020	1923430	1586410	2051730
(4,5-dihidro-2(1H)-pentalenone)	0	-1	-1	16410.2	-1	-1	0	0	0	0	0	0	0	34471.5	77118.7	0	0	0
(NVC011)(ESTER)	0	0	0	0	0	0	0	0	0	0	0	0	0	0	0	0	0	0
(Silanediol, dimethyl-) not likely	3036260	2610330	2516700	2381920	3485730	2457840	2532660	2003120	2152010	1468000	1969530	2449700	1651560	1731110	2530020	3558970	1434830	3418660
Butyrolactone	184064	157226	172197	266337	252664	157648	114255	83877.4	111922	161472	146545	164583	153784	128750	112080	136525	0	176992
2-Furanmethanol (10151504)	120107	129852	212024	205437	224982	128559	34013.4	38695.4	45751.4	95420.6	66230.6	114319	173830	65590.6	109465	39469.4	0	62314.6
Phenyl acetaldehyde	0	0	0	46015.6	0	0	42976.1	47629.7	0	0	59646.8	76072.1	0	54297.8	76686.5	68974.1	0	0
2-Decenal, (E)-	18570.7	-1	-1	-1	-1	-1	-1	-1	-1	-1	-1	19203.9	-1	23084.5	24971.5	-1	-1	-1
(trimethylamine)	0	80408.2	71690.6	109646	151786	102512	0	302255	0	0	0	98036.1	1715040	2573990	0	0	5653520	0
Acetophenone (11101510)	362454	282284	292553	269079	348834	386563	269322	282687	371551	393946	387616	404282	351542	477564	587456	478371	569478	501372
1-nonanol [Emmi 022318 ASDGR1]	82034.4	55478.6	37339.6	0	91285.4	97552.6	89321.8	100310	193585	149638	122525	116273	141328	157724	135220	129256	172704	132967
cyclohexene, 1-chloro-5-(1-chloroetheny	113316	107987	97230	938073	866001	1137500	1719960	1955880	2688590	1924020	1739240	1114340	699236	845610	1045230	360468	1444090	452133
a-Piperidinopropiophenone	81928.6	83047.4	0	0	0	0	0	0	0	89172.7	0	106730	0	0	0	0	0	80344.3
Butanoic acid, 3-methyl- (11021517)	22690.1	31637.8	25159.7	29717.8	50463.8	39925.3	198796	101766	188299	1427490	681512	0	628651	914585	780494	460229	2011840	334911
disulfide, methyl (methylthio)methyl [E	0	0	0	0	0	0	0	0	0	0	0	0	0	33999.8	105496	0	75865.4	72241.7
Ethyl trans-4-decenoate	0	0	0	0	0	0	0	0	0	0	0	0	0	0	0	0	0	0
Decane, 1-chloro-	72453.4	21477	39359	179928	134086	173934	16267	18973.1	44300.3	47399.1	39026.3	38195.6	33027.7	20526.7	27426.7	34003.3	36113.3	42611.5
(methyl 1-propenyl disulfide)	0	25346.2	26801.7	20586.7	0	23594.1	24513.6	25857	37578.2	22223	28243.8	0	20302.8	0	30354.4	0	0	0
Cyclohexene, 1-chloro-4-(1-chlorothenyl	119972	129528	99896.2	1212030	1113510	1483630	2144290	2355020	3643100	2302670	2256900	1440640	830965	948163	1188040	399670	1835190	523475
2-Methylbutanoic acid	45435.6	38834.9	-1	0	65163.8	39879.8	303116	156673	289570	2679940	549116	0	1265420	1492100	1159000	398497	4077110	323746
Estragole	0	0	0	0	0	0	0	0	0	0	0	0	0	0	0	0	0	0
2-Propenoic acid, 2-methyl- (below 80 1	69686.7	89863.2	49781	231314	248198	141953	150762	152394	0	232935	282692	251884	97100.6	148285	88719.1	353200	161529	443663
(methyl 2,4 hexadienoic acid))	0	0	0	0	0	0	0	0	0	0	0	0	0	0	0	0	0	0
2-Ethyl benzaldehyde	0	0	0	0	0	0	0	0	0	0	0	0	0	0	0	0	0	0
2-Pyrrolidinone, 1-methyl- (10151504)	0	0	0	0	0	0	21687.9	0	0	-1	0	26485.1	-1	0	0	21930.7	29270.8	25746
Salicylaldehyde	34404.7	0	28828.4	0	0	0	26341	0	0	0	0	0	0	25517.5	31783.1	0	0	0
Heptadecane (10151504)	90946.8	82766.8	62307.8	53970	194509	51550.9	30786	38262	47542.3	101573	100068	80332.6	35360.6	51080.4	62754.7	6799.29	-1	45402.5
2(3H)-Furanone, 5-ethyldihydro- (110215	8867.2	-1	-1	0	96631.2	0	75035.5	94193	119401	170160	0	0	10669.5	19564.1	0	0	176992	0
2-furoic acid, 4-cyanophenyl ester [Emm	0	0	0	0	0	0	0	0	0	0	0	0	0	0	0	0	0	0
Dodecanal (10151504)	101713	89386.4	61305	103205	104465	85366.4	68752.1	66767.2	72524.2	102760	68534.3	136040	132685	113277	123645	32572.7	91701.1	50395
2(5H)-Furanone, 3-methyl- (below 80 101	135959	86790.1	81901.7	81767.3	75019.9	73802.2	52484.9	-1	49642.3	41378.4	45279.4	162816	34505.4	45181.9	54203.5	29762.2	57024.2	43409.5
(Z,E) a-farnesene	0	0	0	0	0	0	0	0	0	0	0	0	0	0	0	0	0	0
(4-nitrophenyl-2-thiophencarboxylic aci	0	-1	0	0	0	0	0	0	0	0	0	0	0	0	0	0	0	0
Pentanoic acid (! 11101510)	97517.3	35565.3	62279.3	151145	322017	150375	129076	142148	135521	290196	188872	209143	407995	340439	342861	310982	766223	375792
Oxime-, methoxy-phenyl-_	105010	-1	39965.5	30960.7	57217.4	-1	62169.3	56453	0	91170.2	29786.4	52350.4	59316.6	212828	37023.7	160332	0	56750.4
4-Ethyl-benzaldehyde	0	0	0	26564.2	50235.4	44738.4	64907.9	54894.8	92942.4	54126	48619.2	35154	0	0	0	0	0	0
a-farnesene	0	0	0	0	0	0	0	0	0	0	0	0	0	0	0	0	0	0
Acetamide (10151504)	327962	246071	288140	240183	358388	243795	193504	202007	278707	317081	240279	246172	364050	221824	250330	361020	239753	365714
Naphthalene	88719.1	73306.8	74232.5	84542.6	99841.7	104018	194515	214602	274431	277823	278687	206773	164722	207218	194909	838469	1000200	930581
pentenal, 5-(benzoyloxy) [Emmi 031418 A	0	0	0	0	0	0	0	0	0	-1	0	0	0	0	0	0	0	0
Benzenemethanol, .alpha.,.alpha.-dimeth	870052	608207	708254	295255	596123	313016	97540.8	105057	134901	212393	163376	255415	0	87605.9	0	66392.4	129225	0
2(5H)-Furanone	0	0	0	0	507760	0	0	0	0	258352	221229	0	284323	143077	184615	0	117856	223633
Ethyl trans-2-decenoate	0	0	0	0	0	0	0	0	0	0	0	0	0	0	0	0	0	0
1-chloroundecane [Emmi 041318 ASDRB1]	61405.7	-1	-1	101165	106969	133950	-1	-1	43811	-1	32592	37400.2	-1	-1	-1	34048.8	0	0
2-Cyclopenten-1-one, 2-hydroxy-	185532	185171	223322	401186	429480	175518	96484.1	79252.3	114474	279834	183066	332949	224566	19331.8	109753	-1	84663.6	47621.9
Pentyl glycolate (less than 80 10151504	0	0	0	0	0	0	0	0	0	0	0	0	0	0	0	0	0	0
formamide, N,N-dibutyl- [Emmi 031418 AS	161080	179315	156293	0	147168	145891	146311	157913	195534	178703	171076	209189	223633	231561	231768	236631	226207	245332
Cyclotrisiloxane, hexamethyl-	0	0	0	0	0	0	0	0	0	0	0	0	0	0	0	0	0	0
Methyl salicylate	69671.3	71489	64569.1	44664.5	61351.9	49838.9	66413.8	56295.1	77758.8	86503.2	86204.2	89456.6	111806	100350	89066.9	90624.4	107013	92433.6
Octadecane (10151504)	154502	0	0	0	485764	0	472436	363951	773454	82695.1	0	136411	0	1067910	620180	1009280	1622690	905479
Pentanoic acid, 4-methyl- (below 80 111	0	0	0	0	0	0	0	0	0	0	0	0	0	0	0	0	0	0
Ethylamine, 2-((p-bromo-.alpha.-methyl-	0	0	0	0	0	0	0	0	26753.7	0	0	74951.2	0	0	0	0	0	0
ethanol, 1-(2-butoxyethoxy) [Emmi 03091	179831	163941	144208	117483	193763	90632.6	134466	144559	120271	115209	143955	205000	137315	142745	108111	157608	143936	149505
(Methyl 2,4-Decadienoate)(NVC024)	0	0	0	0	0	0	0	0	0	0	0	0	0	0	0	0	0	0
Hexyl octanoate	0	0	0	0	0	0	0	0	0	0	0	0	0	0	0	0	0	0
Z-2-Dodecenol (below 70 10151504)	35804.2	30278.6	28190.4	30770.9	41786.6	39214.6	19714.5	25312.6	32170	38520.7	49403.8	56790.7	62413.7	83586.7	55655	96069.1	50218.6	65175.6
oxazirane, 2-(dimethylethyl)-3-methoxy-	95783.5	92937.6	94706.6	94626	82634.2	87171.8	58305.1	94362.8	51703.7	60883.2	100299	71907.4	85863.9	114867	114171	64105.4	94953.6	115782
(Uracil)	57425.8	45343.2	46953.6	59952.5	71185	29046	33267.2	31332.6	27453.1	66076.1	52647.5	58630.3	28568.4	0	0	0	0	34815.4
(5-cyano-1,2,3-thiodiazole)	0	0	0	0	0	0	0	0	0	0	0	0	0	0	0	0	0	0
Ethyl salicylate	0	0	0	0	0	0	0	0	0	0	0	0	0	0	0	0	0	0
2-Phenylethyl acetate	0	0	0	0	0	0	0	0	-1	0	0	0	0	0	0	0	0	0
(E,Z)-Ethyl 2,4-decadienoate	0	0	0	0	0	0	0	0	0	0	0	0	0	0	0	0	0	0
Hexanoic acid	172059	171126	84781.2	284728	417020	279839	277047	267587	291616	434166	367789	355935	541540	465051	410044	483818	724602	630274
5,9-undecadien-2-one, 6,10-dimethyl- [E	413954	413846	454600	311176	280444	390079	438287	409288	623996	792523	388045	1074720	504650	396524	702421	779653	396607	820035
(4-Methyl-1,5-heptadiene)(NVC002)	0	0	0	0	0	0	0	0	0	0	0	0	0	0	0	0	0	0
oxazolidine, 2,2-diethyl-3-methyl [Emmi	0	0	26088.7	-1	0	0	0	0	0	0	0	0	0	0	0	0	0	0
(NVC030)	0	0	0	0	0	0	0	0	0	0	0	0	0	0	0	0	0	0
2-Methyl-2-propenyl 2-propenoate (NVC00	0	0	0	0	0	0	0	0	0	0	0	0	0	0	0	0	0	0
Propanoic acid, 2-methyl-, 1-(1,1-dimet	59208.2	124044	147358	70759.9	104593	121897	423399	270764	1103460	199876	150042	231169	393839	943367	1881690	1376330	245154	316215
Benzyl alcohol	20600.2	16064.2	18557.3	-1	22957.6	-1	-1	19458.5	29758.1	24342.8	22134	16205.3	20773.2	34782.7	19384.8	63436.8	60333.8	43167.6
4-Methyl-5H-furan-2-one (10151504)	48459.6	52000.4	26289.1	83380.1	0	58482.5	39453	22470.4	0	0	26599.4	0	0	54185	56145.6	88799.8	0	34089.7
(cis-2,6-Dimethyl-2,6-octadiene) (NVC00	0	0	0	0	0	0	0	0	0	0	0	0	0	0	41200.3	0	0	0
dimethyl sulfone [Emmi 031418 ASDGR2]	0	0	0	0	0	0	0	0	0	0	0	0	0	0	0	250923	588536	158567
1,5-cyclooctadiene, 1,6-dichloro [Emmi	243704	279330	181307	715467	746542	836398	1460780	1716570	2003520	1358970	1331630	1003820	538255	550912	659030	234600	975600	299929
phenylethyl alcohol [Emmi 031418 ASDGR2	-1	0	-1	0	21540.5	0	50899	-1	70597	46915.7	0	0	34981	41378.4	30681.8	0	59198.2	-1
Butylated Hydroxytoluene	0	0	0	0	0	32306.4	70262.6	62183.5	128626	0	0	0	0	38208.2	72688.6	0	0	0
(2-propenamide)	0	0	0	0	0	0	0	0	0	0	0	0	0	0	0	0	0	0
Heptanoic acid (11101510)	61609	71243.8	38727.4	65244.5	266347	135468	73601.2	63480.8	142009	498763	110423	238662	305484	232247	198043	168403	356856	201988
methenamine [Emmi 030918 NAC3]	0	0	211346	0	0	0	0	0	0	0	0	0	0	0	0	0	0	0
SOILA7 (1-Dodecanol)	509976	195024	172460	315524	278668	318696	171684	176100	346181	257119	341359	195576	152893	122262	156010	112135	208176	193854
Ethanol, 2,2'-oxybis- (10151504)	47906.9	55095.6	112859	53634	94820.9	37380	42517.4	24304.6	66672.5	46747.7	48552	80480.4	46193.3	56300.2	52068.2	85649.8	118455	202206
Benzothiazole	367582	374079	398745	326910	370163	299097	348062	323939	435743	248994	254964	271601	129300	120920	123263	130398	161035	154372
Sulfurous acid, 2-ethylhexyl hexyl este	0	88187.1	0	0	625266	0	0	0	0	0	0	867292	0	0	0	0	0	0
dodecyl acrylate [Emmi 030918 ASDWH1]	29121.1	56360.4	52013.8	32091.3	183825	21766.6	0	0	20981.1	106016	43931.9	161177	25875.4	57187.9	31059.5	1769.94	104686	92053.9
Levoglucosenone	0	29583.8	0	0	0	0	0	0	0	0	0	0	0	0	0	0	0	0
(NVC032)(Glycerin)	0	0	0	0	0	0	0	0	0	0	0	0	0	0	0	0	0	0
(vinylfuran?)	618773	449953	456333	361002	659420	385416	291515	289614	281210	1163970	582661	351513	723801	1074270	1045920	285007	2244990	465629
(NVC012)	0	0	0	0	0	0	0	0	0	0	0	0	0	0	0	0	0	0
3-Furancarboxylic acid, methyl ester (1	33430.3	43122.9	48350.4	92277.4	-1	41920.2	36000.8	-1	19083.8	47223.1	38488.2	-1	-1	0	31674.7	-1	0	41677.4
2-nonanone, 9-hydroxy- [Emmi 031418 ASD	-1	-1	0	0	24017.3	0	-1	-1	16951.2	-1	-1	28917.8	0	-1	-1	-1	0	-1
(Methyl 9-dodecenoate, (E)-)(NVC025)	0	0	0	0	0	0	0	0	0	0	0	0	0	0	0	0	0	0
Vanillin	0	0	0	0	0	0	0	0	0	0	0	0	0	0	0	0	0	0
phenol, 4-ethyl-2-methoxy [Emmi 020318	37596.7	0	-1	0	17055.4	0	103900	121089	251415	18538.8	23590.6	0	0	0	0	0	0	0
(NVC013)(Ethyl 9-tetradecenoate)	0	0	0	0	0	0	0	0	0	0	0	0	0	0	0	0	0	0
1,2,3-propanetriol, diacetate [Emmi 041	76587.8	175076	112278	45252.5	114232	116221	153406	0	189694	0	152221	232253	302508	168191	289169	0	0	0
triacetin [Emmi 042018 ASDRB1]	0	0	0	0	0	41623.7	-1	-1	-1	87665.8	0	0	0	-1	21850.4	32687.3	-1	-1
Octanoic Acid	20014.6	53909.5	-1	107829	298082	108637	77721.8	76236.7	37304.4	134126	166374	386966	210504	195621	167933	36992.5	157125	138486
(NVC014)(triunsaturated)	0	0	0	0	0	0	0	0	0	0	0	0	0	0	0	0	0	0
(1-Octen-3-one)(NVC008)	0	0	0	0	0	0	0	0	0	0	0	0	0	0	0	0	0	0
p-Cresol (! 11101510)	486501	300856	309564	243390	369277	232304	641736	416677	470061	7966170	2451920	156845	3680150	3969450	4527420	2710590	16707200	2386010
phenol, 2-chloro-4-(1,1-dimethylethyl)	161779	63535.9	48182.4	178517	215484	204406	382437	432667	543077	334720	350949	181171	130570	107974	102819	43916.2	243395	50994.8
Cyclopropyl carbinol	414518	389626	633304	932250	1331480	429793	0	0	242784	661772	432093	1028650	615932	0	0	0	0	0
(NVC015)	0	0	0	0	0	0	0	0	0	0	0	0	0	0	0	0	0	0
NVC007	0	0	0	0	0	0	0	0	0	0	0	0	0	0	0	0	0	0
Ethanol, 2-[2-(ethenyloxy)ethoxy]- (bel	0	0	0	0	0	0	0	0	0	0	0	0	0	0	0	0	0	0
Nonanoic acid (11101510)	72406.3	71210.2	51449.3	170132	793615	212727	160791	160376	200305	260906	228865	1557330	328583	282171	264491	291290	289812	325327
Cycloheptane, methyl- (below 80 1015150	0	0	34438.3	-1	108770	42134.6	56586.3	51766.7	120489	0	-1	64690.1	0	227866	229264	0	64690.8	0
Eugenol	0	0	0	0	0	0	0	0	0	0	0	0	0	0	0	0	0	0
3,5-Dimethyldodecane (11021517)	137456	635262	49108.1	107740	2660520	55814.6	226157	89582.6	42111.2	97685.3	332546	4101370	2407790	805898	1061700	501596	704263	2726290
Caprolactam	0	0	0	0	104350	0	0	0	0	0	0	97690.3	0	0	0	0	0	0
hexadecanoic acid, methyl ester [Emmi 0	0	0	0	0	0	0	0	0	0	0	0	0	0	0	0	0	0	0
ketone, methyl 2-methyl-1,3-oxothiolan-	1070590	1277270	1029700	621576	1235960	1288300	508163	434797	511503	674874	623017	1057860	894319	737053	685937	1051570	1196220	818965
Diisooctyl phthalate	0	0	0	0	0	0	0	0	0	0	0	0	0	0	0	0	0	0
Isopropyl Palmitate (less than 80 11101	0	0	0	0	-1	0	0	0	0	0	0	-1	0	-1	0	0	0	16028.7
pentadecanoic acid [Emmi 032418 ASDWH2]	0	0	0	0	0	0	0	0	0	0	0	0	0	0	0	0	0	0
Methyl anthranilate	0	0	0	0	0	0	0	0	0	0	0	0	0	0	0	0	0	0
4-Methyl-2-oxopentanenitrile (less than	0	0	0	0	32914	0	0	0	0	0	0	31244.6	0	0	0	0	0	0
n-Decanoic acid (! 10151504)	0	0	0	59495.5	532646	88710.7	63137.4	45370.1	68470.1	0	95657.5	1186910	106166	110920	92935.9	77579.1	0	110072
Cinnamyl alcohol	0	0	0	0	0	0	0	0	0	0	0	0	0	0	0	0	0	0
Methyl dihydro Jasmonate	0	0	0	0	0	0	0	0	0	0	0	0	0	0	0	0	0	0
(NVC033)	30848.2	29914.1	37322.8	33682.3	60690.3	23291.8	38748.4	31669.7	31411	35281.7	39522	74308.5	38695.4	-1	23326.8	25717.4	25549.4	0
tricosane, 2-methyl- [Emmi 031418 ASDGR	0	41593.4	384906	780126	143130	0	613645	1101230	369397	469948	687328	560114	444567	251848	506329	5153560	419542	2903980
Methyl jasmonate	0	0	0	0	0	0	0	0	0	0	0	0	0	0	0	0	0	0
(E,E)-Farnesol	0	0	0	0	0	0	0	0	0	1104730	0	0	0	1217730	1961350	1754880	0	4401750
Diethyl Phthalate	1229700	1021180	1635350	717197	1084790	859984	770745	686297	612786	647249	736013	1477090	783418	488888	1764450	672212	526352	942673
docosane, 7-hexyl- [Emmi 031418 ASDGR2]	10539000	181195	2996750	6446470	48258.4	3946310	2169050	4817060	2779020	9622430	8263650	886257	306692	2794550	8685840	10238800	17038600	2459040
dodecanoic acid [Emmi 031418 ASDGR2]	2859780	4183960	2642230	4381330	0	2116040	1984890	0	0	3232740	4214520	620346	6776740	3652740	3846630	9331690	0	5053970
1,4:3,6-Dianhydro-.alpha.-d-glucopyrano	0	0	0	0	0	0	0	0	0	0	0	0	0	0	0	0	0	0
cyclohexadecane [Emmi 031418 ASDGR2]	0	-1	0	0	30095.5	329735	0	0	838375	335153	0	344440	429043	0	0	0	0	0
Triethylene glycol (10151504)	0	0	0	0	0	0	0	0	0	0	0	0	0	0	0	0	0	0
1,2-benzenedicarboxylic acid, mono(2-et	90108.2	188303	2255730	1815040	1080520	690156	1515360	2460930	2878600	11711500	6087940	0	90674600	19755700	16594200	35109300	8014860	66631100
