# Supplementary material for: Analysis of Environmental Variables and Carbon Input on Soil Microbiome, Metabolome and Disease Control Efficacy in Strawberry Attributable to Anaerobic Soil Disinfestation
Source: Microorganisms. 2021 Jul 31;9(8):1638. doi: 10.3390/microorganisms9081638 (PMC8401821; doi:10.3390/microorganisms9081638)
Supplement: Supplementary file 1 [file microorganisms-09-01638-s001.zip › Hewavitharana et al. 2021_Supplementary Material_Soil Microbiome Data_S3.xlsx]

## Sheet: Fungi_OTU_Percentages
Hewavitharana, S.S.; Klarer, E.; Muramoto, M.; Shennan, C.; Mazzola, M. Analysis of environmental variables and carbon input on soil microbiome, metabolome and disease control efficacy in strawberry attributable to anaerobic soil disinfestation. Microorganisms 2021, 9, X
Supplementary Material
otu name	taxonomy	0NAC.G1	0NAC.G2	0NAC.G3	0GR.G1	0GR.G2	0GR.G3	1NAC.G1	1NAC.G2	1NAC.G3	1GR.G1	1GR.G2	1GR.G3	3NAC.G1	3NAC.G2	3NAC.G3	3GR.G1	3GR.G2	3GR.G3	7NAC.G1	7NAC.G2	7NAC.G3	7GR.G1	7GR.G2	7GR.G3	15NAC.G1	15NAC.G2	15NAC.G3	15GR.G1	15GR.G2	15GR.G3	21NAC.G1	21NAC.G2	21NAC.G3	21GR.G1	21GR.G2	21GR.G3	31NAC.G1	31NAC.G2	31NAC.G3	31GR.G1	31GR.G2	31GR.G3	0NAC.W1	0NAC.W2	0NAC.W3	0WH.W1	0WH.W2	0WH.W3
OTU_1	___ay667486.1__gi:50313401_ ;k__fungi;p__ascomycota;c__sordariomycetes;o__hypocreales;f__nectriaceae;g__fusarium;s__fusarium oxysporum;subclass hypocreomycetidae;subphylum__pezizomycotina;subkingdom__dikarya;superkingdom__eukaryota	12.2561	10.5069	11.2444	5.28935	5.73081	4.47864	10.076	12.0058	13.3696	17.0814	9.02377	16.1331	12.7333	14.5262	13.3475	37.1609	24.8867	44.3557	15.8676	16.933	16.5973	75.145	51.3857	0.644449	13.8278	21.969	12.8368	31.2751	12.4221	16.328	20.1593	17.5268	14.6771	24.3825	18.7805	23.1388	14.7523	16.9852	9.80095	83.5215	0.692523	0.863995	12.4933	14.8601	15.9534	15.3097	14.6044	13.941
OTU_2	lasiodiplodia pseudotheobromae ;k__fungi;p__ascomycota;c__dothideomycetes;o__botryosphaeriales;f__botryosphaeriaceae;g__lasiodiplodia;s__lasiodiplodia pseudotheobromae;subphylum__pezizomycotina;subkingdom__dikarya;superkingdom__eukaryota	4.76242	5.52029	5.02713	1.73836	1.36558	1.5795	6.03732	3.82436	5.67368	0.338189	0.746252	0.531888	5.56324	5.30246	4.81125	0.189126	1.2635	0.479595	4.44595	4.93193	5.15816	0.353602	1.24835	0.0744947	4.34406	3.88172	2.86668	0.304101	2.89265	4.89065	3.55118	3.80182	4.03684	5.01169	5.49189	5.42975	2.91402	5.24427	4.85977	0.111412	0.379147	0.066357	4.21994	5.83651	5.69455	4.00767	3.58572	3.25371
OTU_3	mortierella sp. 11ma04 ;k__fungi;p__fungi;c__mortierellomycotina;o__mortierellales;f__mortierellaceae;g__mortierella;s__mortierella sp.;superkingdom__eukaryota;subphylum__mortierellomycotina	7.51898	11.7222	12.8738	5.97776	5.95636	5.36517	12.3694	10.2003	12.692	2.04158	2.71334	2.75205	12.6287	11.4687	16.8173	6.69888	3.82485	2.06238	11.6412	15.0092	11.9566	0.969344	3.95728	0.162342	12.2672	11.3901	12.8157	3.109	10.0358	19.1182	12.4193	13.9458	15.5472	14.6995	22.6333	19.2769	11.9381	15.517	15.8679	0.243713	0.582261	0.212613	8.78856	10.8395	9.84109	11.363	12.6747	11.0907
OTU_4	___af322074.1__gi:11692812_ ;k__fungi;p__ascomycota;c__sordariomycetes;o__hypocreales;f__nectriaceae;g__fusarium;s__fusarium oxysporum;subclass hypocreomycetidae;subphylum__pezizomycotina;subkingdom__dikarya;superkingdom__eukaryota	3.42639	6.59701	5.06467	3.29099	1.18912	1.17211	6.90335	4.69989	2.23337	4.93485	0.912579	3.5843	3.34706	1.46409	0.919262	9.01448	2.28513	3.04286	1.49813	1.82883	1.44968	1.39399	7.25294	78.6629	1.26258	0.965905	1.13648	9.16646	0.854418	2.27866	0.521886	0.57056	0.768592	0.440571	0.758513	0.825995	0.638039	0.874827	0.898397	0.315666	0.199246	42.0554	7.10278	10.7434	9.12384	5.59767	12.5916	9.45547
OTU_5	guehomyces pullulans ;k__fungi;p__basidiomycota;c__tremellomycetes;o__cystofilobasidiales;f__cystofilobasidiaceae;g__guehomyces;s__guehomyces pullulans;subkingdom__dikarya;superkingdom__eukaryota	7.71812	7.03706	6.86865	3.26623	3.04109	2.38617	5.35841	5.80939	7.40225	1.60612	1.2286	0.82474	4.54208	6.82267	9.78755	0.778754	1.78291	1.76436	8.38661	5.71549	8.15719	0.626358	2.56026	0.0857392	8.18236	6.04884	6.20235	1.17485	2.22523	3.33157	6.02327	5.03756	8.5099	4.7079	0.98802	1.44315	4.96706	6.38882	7.17875	0.0858797	0.0831802	0.0866704	5.73366	5.57776	5.03284	6.79779	4.80175	5.14878
OTU_6	fungal sp. ksl3 ;k__fungi;p__cryptomycota;c__cryptomycota;o__cryptomycota;f__cryptomycota;g__paramicrosporidium;s__fungal sp.;superkingdom__eukaryota	9.10364	4.85741	4.96518	1.11681	1.91181	2.20616	5.47267	5.36206	5.85878	0.223951	0.408055	0.553164	7.00976	4.4362	2.19932	0.111251	1.62431	1.90586	3.15285	5.37745	3.44464	0.231107	1.06905	0.0534113	5.62018	3.64148	2.81574	0.25688	1.46718	1.94356	6.41763	3.69001	6.85501	3.10308	4.63897	1.57251	3.41397	2.1085	5.55602	0.0568663	0.226327	0.0595859	6.29101	3.98035	11.8383	4.48902	3.48525	3.86502
OTU_7	___ab032681.1__gi:7262501_ ;k__fungi;p__basidiomycota;c__tremellomycetes;o__filobasidiales;f__filobasidiales;g__cryptococcus;s__cryptococcus terreus;superkingdom__eukaryota;subkingdom__dikarya	2.37397	3.06724	2.30144	1.64178	1.22135	1.21271	2.80174	1.96001	3.12672	1.66041	1.08556	1.38166	2.43898	2.39867	2.87485	0.691343	1.22649	0.906598	2.83159	3.08128	2.40392	0.266222	2.38209	0.0463835	3.50324	1.95485	2.32566	1.51295	1.56643	2.9612	2.79974	2.53742	3.36288	2.85337	1.3038	1.83745	2.48311	3.41722	2.93383	0.0557058	0.0619015	0.0555232	2.48657	3.56357	3.19745	3.03842	5.25559	3.79778
OTU_8	___ay238888.1__gi:29692017_ ;k__fungi;p__fungi;c__mucoromycotina;o__mucorales;f__mucoraceae;g__amylomyces;s__amylomyces rouxii;superkingdom__eukaryota;subphylum__mucoromycotina;suborder__mucorineae	0.083276	0.0749022	0.0732106	5.84157	8.62767	20.3982	0.10432	0.117718	0.149911	18.1355	19.4935	18.8213	0.109712	0.0756448	0.0806034	1.54162	3.47197	3.06165	0.0532739	0.0794467	0.0938114	0.450782	0.801217	1.8708	0.0794755	0.108603	0.10188	0.89908	2.2281	0.0828924	0.0941749	0.0602099	0.0577021	0.184499	0.0651084	0.271176	0.0682128	0.0797429	0.117915	0.0638295	0.0715737	0.0826077	0.113483	0.0867652	0.137655	3.33682	6.4924	11.0831
OTU_9	___ef601603.1__gi:148633605_ ;k__fungi;p__ascomycota;c__sordariomycetes;o__lulworthiales;f__lulworthiaceae;g__zalerion;s__zalerion sp.;subphylum__pezizomycotina;subkingdom__dikarya;superkingdom__eukaryota	1.69328	2.16467	2.25263	0.641359	0.622948	0.495371	2.00361	1.88349	1.60313	0.266932	0.344851	0.292851	2.26176	2.53532	2.77314	0.243162	0.555093	0.216632	1.46261	1.75717	1.82786	0.216408	1.6047	0.0337334	1.55338	2.047	2.0815	0.69131	1.67863	7.05996	3.12347	2.73238	2.95204	2.11697	5.24611	3.20112	1.37757	2.3618	1.87821	0.047582	0.106393	0.0460436	2.42251	2.46816	2.47778	1.98641	2.33851	1.78045
OTU_10	___am901693.1__gi:163257628_ ;k__fungi;p__fungi;c__mucoromycotina;o__mucorales;f__mucoraceae;g__mucor;s__mucor sp.;superkingdom__eukaryota;subphylum__mucoromycotina;suborder__mucorineae	0.0917243	0.0936277	0.0788421	0.735458	1.83969	0.986682	0.0993526	0.0809311	0.140733	6.86671	13.3727	11.7366	0.146845	0.114687	0.120905	2.55559	6.34656	5.35193	0.0807181	0.0950245	0.0879482	2.74797	6.36093	8.15787	0.0993443	0.100375	0.0913402	1.93793	19.8717	0.530864	0.0745551	0.169161	0.0969395	2.8486	1.52679	7.85163	0.10731	0.112578	0.0898397	0.169438	2.53603	12.0174	0.0549114	0.0356357	0.012075	0.0740547	0.0848794	0.137545
OTU_11	___am292050.1__gi:110835640_ ;k__fungi;p__ascomycota;c__ascomycota;o__ascomycota;f__ascomycota;g__trichocladium;s__trichocladium asperum;superkingdom__eukaryota;subkingdom__dikarya	1.02948	0.977473	1.1939	0.829557	0.572314	0.477776	1.19554	0.856399	1.20388	1.30412	1.54018	1.02623	1.0583	0.990703	0.877041	1.79113	1.48818	2.20764	1.15265	0.758638	0.929319	0.202525	0.331381	0.0302195	0.940159	1.1321	0.746531	4.36318	0.342343	0.0599647	1.10655	1.15259	1.07095	0.968619	0.0651084	0.0763656	2.19113	0.795084	0.831017	0.0394583	0.0812458	0.0162507	1.08908	0.918782	0.748648	0.951821	2.096	1.65971
OTU_12	heydenia alpina ;k__fungi;p__ascomycota;c__pezizomycetes;o__pezizales;f__pyronemataceae;g__heydenia;s__heydenia alpina;subphylum__pezizomycotina;subkingdom__dikarya;superkingdom__eukaryota	0.132759	0.116098	0.168947	23.9036	22.733	13.8569	0.139094	0.18982	0.178976	17.6503	18.4822	13.9117	0.109712	0.136649	0.140096	7.61113	29.8177	8.14811	0.111391	0.121507	0.0996746	7.4379	0.21676	1.63326	0.130954	0.156322	0.154576	0.645978	0.97956	0.141093	0.123605	0.0745456	0.106172	0.227443	0.141611	0.110652	0.110638	0.124305	0.115107	0.103288	0.0967212	0.228864	0	0.012395	0	0.00435616	0	0
OTU_13	cryptococcus terricola ;k__fungi;p__basidiomycota;c__tremellomycetes;o__filobasidiales;f__filobasidiales;g__cryptococcus;s__cryptococcus terricola;superkingdom__eukaryota;subkingdom__dikarya	2.31	2.04108	2.57926	0.963277	0.715009	0.833739	2.33313	1.70691	2.22878	0.239786	0.453517	0.340408	2.48118	2.31327	1.88458	0.193894	0.741446	0.353122	1.89526	1.96124	2.29545	0.149444	1.2597	0.0274084	2.41949	1.83802	1.52468	0.377765	1.41252	3.69841	1.80698	3.2542	2.41656	1.82272	1.56423	1.17665	1.96819	2.6925	2.08035	0.0290134	0.036754	0.0352098	1.65649	1.40219	1.62046	2.01908	1.04973	1.76516
OTU_14	___jf439485.1__gi:328923735_ ;k__fungi;p__fungi;c__mortierellomycotina;o__mortierellales;f__mortierellaceae;g__mortierella;s__mortierella elongata;superkingdom__eukaryota;subphylum__mortierellomycotina	0.428449	0.496227	0.643878	0.339252	0.323749	0.231444	0.415625	0.392884	0.414551	0.918427	0.953606	2.28775	0.401715	0.575877	0.360796	3.93668	0.707083	3.80295	0.655431	0.472007	0.649351	0.222941	0.568569	0.0189751	0.62316	0.480484	0.641138	1.68672	0.0373988	0.181658	0.829916	0.708183	0.600102	0.0668013	0.0651084	0.110652	0.613915	0.52302	0.567113	0.00696322	0.0193442	0.0148965	0.440206	0.491153	0.330854	0.635999	0.918083	1.1997
OTU_15	___dq104720.1__gi:70888516_ ;k__fungi;p__ascomycota;c__saccharomycetes;o__saccharomycetales;f__pichiaceae;g__kregervanrija;s__kregervanrija fluxuum;subphylum__saccharomycotina;subkingdom__dikarya;superkingdom__eukaryota	2.53931	2.2995	1.94665	0.537355	0.670513	0.533268	2.32982	1.63922	1.72704	0.131204	0.252816	0.182719	2.32927	1.91308	1.93064	0.0794647	0.393852	0.175309	1.57723	1.39265	0.880947	0.102896	0.663898	0.0281112	1.97876	1.07286	0.669243	0.130329	0.812704	1.33157	1.20858	1.28448	1.1148	0.979753	1.90117	0.945999	1.64293	1.01555	0.898397	0.0487426	2.21298	0.0270845	1.75533	3.06777	1.676	1.7185	1.09131	1.1401
OTU_16	___dq189222.1__gi:76150856_ ;k__fungi;p__ascomycota;c__saccharomycetes;o__saccharomycetales;f__dipodascaceae;g__galactomyces;s__galactomyces geotrichum;subphylum__saccharomycotina;subkingdom__dikarya;superkingdom__eukaryota	0.0446552	0.033706	0.0356667	0.0371443	0.0398932	0.0433111	0.026494	0.0397298	0.0413021	0.0848301	0.0953606	0.0951141	0.0320697	0.0439228	0.0460591	0.0524467	0.0330412	0.0626104	0.0226011	0.0327133	0.0205212	0.245807	0.279177	0.0210834	0.0289002	0.0345554	0.0316178	0.154884	0.0373988	0.100529	0.0313916	0.0430071	0.0300051	0.0270386	0.0488313	0.191693	0.0282834	0.0422169	0.0870322	5.95704	8.91962	0.0473979	0.162904	0.120852	0.152145	0.115438	0.124721	0.158941
OTU_17	___hq850344.1__gi:345647539_ ;k__fungi;p__ascomycota;c__eurotiomycetes;o__eurotiales;f__aspergillaceae;g__penicillium;s__penicillium sp.;subclass eurotiomycetidae;subphylum__pezizomycotina;subkingdom__dikarya;superkingdom__eukaryota	2.51518	2.84815	1.55432	1.17871	0.463375	0.648314	1.64263	1.93646	2.07275	0.244311	0.493436	0.376702	1.09206	1.66175	1.06512	0.185947	0.417641	0.200353	1.8436	1.62476	1.86743	0.260506	0.798947	0.0203806	2.69404	1.82814	0.966099	0.319211	2.00946	0.407407	0.996684	1.99839	1.1425	1.00679	0.258806	0.199486	1.86088	1.66757	1.01631	0.0255318	0.0116065	0.0230218	3.72482	4.1136	2.75792	2.77052	1.76688	1.53745
OTU_18	massarina corticola ;k__fungi;p__ascomycota;c__dothideomycetes;o__pleosporales;f__massarinaceae;g__massarina;s__massarina corticola;suborder__massarineae;subclass pleosporomycetidae;subphylum__pezizomycotina;subkingdom__dikarya;superkingdom__eukaryota	1.0669	1.337	1.56558	0.50021	0.317611	0.464241	1.68734	0.916729	1.58478	0.0927476	0.215116	0.123899	1.13932	1.25424	1.52187	0.0715183	0.438788	0.157778	1.09615	1.4316	0.992349	0.0947294	0.427845	0.0161639	1.71414	0.903377	0.985421	0.103885	1.06443	2.08818	1.06928	0.957624	1.06633	2.1615	2.76385	1.70654	1.43247	1.85285	1.90067	0.0243713	0.152819	0.0162507	1.08816	1.59431	1.36447	1.00845	0.944066	0.651048
OTU_19	pseudeurotium sp. 02nh04 ;k__fungi;p__ascomycota;c__leotiomycetes;o__leotiomycetes;f__pseudeurotiaceae;g__pseudeurotium;s__pseudeurotium sp.;superkingdom__eukaryota;subkingdom__dikarya;subphylum__pezizomycotina	1.14776	0.956875	1.56183	0.403635	0.28539	0.263927	0.83125	0.357569	1.10445	0.0870922	0.157456	0.0688326	0.752793	0.973622	1.03249	0.0556253	0.351559	0.127725	0.849154	1.42537	2.1474	0.0914629	0.346135	0.0245973	2.08894	0.771737	0.700861	0.101996	1.73041	3.90653	2.38969	1.51672	2.61506	2.74204	1.4389	2.78968	1.3185	2.27033	1.61711	0.0417793	0.133475	0.0203134	1.35265	2.21716	1.98754	1.35912	1.16406	1.15538
OTU_20	___fj664854.1__gi:238058325_ ;k__fungi;p__ascomycota;c__eurotiomycetes;o__verrucariales;f__verrucariaceae;g__verrucaria;s__verrucaria sp.;subclass chaetothyriomycetidae;subphylum__pezizomycotina;subkingdom__dikarya;superkingdom__eukaryota	0.914829	0.668502	0.777158	0.250105	0.39126	0.297764	0.923979	0.525317	0.711314	0.0452427	0.175197	0.0813476	0.779799	1.59586	0.623717	0.0397324	0.263008	0.151517	0.545654	0.654267	0.631761	0.0342986	0.157747	0.00843336	0.792948	0.587442	0.874758	0.0509982	0.424332	0.705467	1.22231	0.89168	1.23482	0.456476	0.489941	0.355334	0.850997	0.881863	0.926472	0.0127659	0.0212787	0.0216676	0.486881	0.275789	0.630313	0.777574	0.467703	0.872648
OTU_21	exophiala sp. nh512 ;k__fungi;p__ascomycota;c__eurotiomycetes;o__chaetothyriales;f__herpotrichiellaceae;g__exophiala;s__exophiala sp.;subclass chaetothyriomycetidae;subphylum__pezizomycotina;subkingdom__dikarya;superkingdom__eukaryota	0.576898	0.734041	0.702071	0.230295	0.220947	0.312652	0.567965	0.52826	0.737319	0.0610777	0.0887075	0.0688326	0.401715	0.62224	0.711996	0.0349645	0.103089	0.0651148	0.487537	0.395676	0.574595	0.040015	0.146398	0.00913614	0.679154	0.511749	1.87599	0.0679977	0.581119	0.507937	0.306068	0.639372	0.60241	0.351502	0.397161	0.241565	0.528233	0.773976	0.569921	0.0092843	0.0116065	0.00947957	0.596703	0.343962	0.379154	0.967067	0.34125	0.466126
OTU_22	___z48816.1__gi:1771822_ ;k__fungi;p__ascomycota;c__sordariomycetes;o__hypocreales;f__hypocreaceae;g__trichoderma;s__trichoderma hamatum;subclass hypocreomycetidae;subphylum__pezizomycotina;subkingdom__dikarya;superkingdom__eukaryota	0.731381	0.719061	0.857878	0.2402	0.291527	0.231444	0.889205	0.49883	0.68072	1.04963	0.308259	0.45805	0.708909	0.739367	1.4547	1.22852	0.403103	0.257955	0.729691	0.9113	1.01873	0.116779	0.835263	0.0309223	1.14607	0.419601	6.09345	0.262547	0.397002	0.289242	0.914281	0.825735	1.01094	0.569402	0.109057	0.363126	1.02486	0.968642	1.26618	0.0313345	0.0270819	0.0216676	0.608601	0.294382	0.260819	0.490068	1.98514	0.793178
OTU_23	___ab094666.1__gi:37998958_ ;k__fungi;p__ascomycota;c__dothideomycetes;o__pleosporales;f__pleosporaceae;g__alternaria;s__alternaria alternata;suborder__pleosporineae;subclass pleosporomycetidae;subphylum__pezizomycotina;subkingdom__dikarya;superkingdom__eukaryota	0.0518966	0.0617943	0.105123	13.8177	14.9323	14.539	0.0645792	0.0691593	0.100961	7.79532	5.39564	3.05742	0.0658272	0.0536834	0.0575738	5.7008	1.88335	3.82424	0.0613457	0.0623111	0.0776875	1.38828	0.0726315	0.1265	0.069541	0.0559468	0.0509398	8.13328	0.0575366	0.0934744	0.0667072	0.0716784	0.0484697	0.0874779	0.0585976	0.0981844	0.0690447	0.0609799	0.12353	0.0568663	0.0560983	0.0568774	0.00183038	0	0	0.00871232	0.045038	0.0198677
OTU_24	___jf439467.1__gi:328923717_ ;k__fungi;p__ascomycota;c__sordariomycetes;o__sordariales;f__chaetomiaceae;g__chaetomium;s__chaetomium nigricolor;subclass sordariomycetidae;subphylum__pezizomycotina;subkingdom__dikarya;superkingdom__eukaryota	0.0132759	0.0243432	0.0506842	0.00742887	0.00767177	0.0243625	0.0115911	0.0117718	0.0122377	0.015835	0.0155238	0.0137665	0.0168788	0.00976062	0.0115148	0.0222501	0.0105732	0.00626104	0.0226011	0.01402	0.0190554	0.0236824	0.0204276	0.00632502	0.0126438	0.0230369	0.0175654	0.0358877	0.0230146	0.010582	0.0156958	0.0315385	0.0230808	0.0127241	0.011394	0.0187018	0.0141417	0.0234538	0.0224599	0.0139264	11.9335	0.186883	0.0100671	0.0356357	0.012075	0.00217808	0.0207868	0.0122262
OTU_25	___gu062204.1__gi:262034938_ ;k__fungi;p__ascomycota;c__dothideomycetes;o__pleosporales;f__sporormiaceae;g__preussia;s__preussia sp.;subclass pleosporomycetidae;subphylum__pezizomycotina;subkingdom__dikarya;superkingdom__eukaryota	0.0036207	0.0112353	0.00563158	0.00742887	0.00306871	0.00135347	0.00331175	0.00294295	0.00611883	0.00113107	0.00443538	0.00375451	0.0118151	0.0170811	0.0172722	0.00635718	0.0105732	0.00626104	0.00161436	0.00155778	0.00439741	0.00653307	0.00567434	0.00140556	0.00270939	0.00658198	0.0263481	0.00566647	0.00431524	0.0123457	0.0117719	0.00860141	0.0346212	0.0222671	0.00162771	0.0109094	0.00748677	0.0140723	0.00561498	0.00232107	0.717671	1.76185	0.0594873	0.0495801	0.0434699	0.0457397	0.0588959	0.0580747
OTU_26	___hq829068.1__gi:327532817_ ;k__fungi;p__ascomycota;c__sordariomycetes;o__sordariales;f__sordariaceae;g__sordaria;s__sordaria sp.;subclass sordariomycetidae;subphylum__pezizomycotina;subkingdom__dikarya;superkingdom__eukaryota	0.0144828	0.0205981	0.058193	0.0495258	0.0981987	0.077148	0.0215264	0.0691593	0.0382427	0.251097	0.0465715	0.102623	0.0320697	0.119568	0.111309	0.0953577	0.109697	0.0588537	0.0274441	0.0373867	0.0102606	0.0563477	0.0181579	0.0175695	0.0153532	0.0608833	0.0210785	0.0377765	0.0460293	0.0458554	0.0412015	0.0401399	0.0461617	0.0302196	0.0765024	0.0233772	0.0440888	0.0469076	0.0617648	0.0208897	10.7419	10.1337	0.126296	0.0557776	0.0241499	0.082767	0.0692893	0.048905
OTU_27	___dq198781.1__gi:82400003_ ;k__fungi;p__basidiomycota;c__atractiellomycetes;o__atractiellales;f__hoehnelomycetaceae;g__atractiella;s__atractiella solani;subphylum__pucciniomycotina;subkingdom__dikarya;superkingdom__eukaryota	0.932933	0.717188	0.886036	0.227819	0.265443	0.318066	0.6342	0.635677	0.748027	0.0463738	0.14415	0.0800961	0.400027	3.7188	0.533518	0.0349645	0.261687	0.156526	0.686104	0.947129	0.974759	0.0310321	0.127105	0.00983892	0.882358	0.437702	0.639382	0.0491094	0.615641	0.961199	0.621947	1.05511	0.736278	0.827064	1.35588	0.483129	1.09806	0.342426	0.755215	0.0174081	0.036754	0.012188	0.136363	0.0774689	0.0845247	1.25457	0.190545	0.901686
OTU_28	___ay943051.1__gi:62948157_ ;k__fungi;p__ascomycota;c__dothideomycetes;o__pleosporales;f__sporormiaceae;g__sporormia;s__sporormia subticinensis;subclass pleosporomycetidae;subphylum__pezizomycotina;subkingdom__dikarya;superkingdom__eukaryota	0.286035	0.471884	0.422369	0.0965753	0.104336	0.123166	0.485172	0.247208	0.338065	0.128942	0.110884	0.168953	0.391588	0.446548	0.487458	0.0937684	0.109697	0.0651148	0.372917	0.389444	0.438275	0.0743136	0.360888	0.0105417	0.45879	0.380109	0.331987	0.0906635	0.421455	0.425044	0.745551	1.30168	1.38023	0.951124	0.450876	0.372477	0.570659	1.25947	1.575	0.0208897	8.48051	0.0853161	0.348687	0.472561	0.420209	0.444328	0.639193	0.304128
OTU_29	___gu566291.1__gi:291498479_ ;k__fungi;p__ascomycota;c__sordariomycetes;o__sordariales;f__cephalothecaceae;g__phialemonium;s__taifanglania inflata;subclass sordariomycetidae;subphylum__pezizomycotina;subkingdom__dikarya;superkingdom__eukaryota	0.701208	0.428815	0.489948	0.118862	0.151901	0.135347	0.589492	0.257508	0.509392	0.0113107	0.0487891	0.0412996	0.788239	0.636881	0.276354	0.0111251	0.0515443	0.0288008	0.301886	0.356731	0.353258	0.0261323	0.0975986	0.0105417	0.542781	0.268216	0.245916	0.0339988	0.156787	0.638448	0.378662	0.387063	0.424687	0.326054	0.294616	0.350658	0.569827	0.389333	0.356551	0.015087	0.0174098	0.0108338	0.669919	0.559326	0.480583	0.429082	0.327392	0.217016
OTU_30	___jf735264.1__gi:345447607_ ;k__fungi;p__ascomycota;c__sordariomycetes;o__hypocreales;f__nectriaceae;g__ilyonectria;s__ilyonectria robusta;subclass hypocreomycetidae;subphylum__pezizomycotina;subkingdom__dikarya;superkingdom__eukaryota	0.561208	0.659139	0.739614	0.195627	0.291527	0.234151	0.93557	0.607719	0.422199	0.377777	0.23064	0.302863	0.700469	0.583197	0.735026	0.692932	0.367419	0.583528	0.561798	0.691653	0.674269	0.106162	0.150937	0.0161639	0.578906	0.766801	0.298612	0.219104	0.296313	0.123457	0.984912	1.00923	0.632415	0.321283	0.351585	0.0732487	0.773633	0.691887	0.510963	0.0220502	0.0193442	0.0162507	0.459425	0.27424	0.335684	0.768862	0.322195	0.88029
OTU_31	fungal sp. ksl3 ;k__fungi;p__cryptomycota;c__cryptomycota;o__cryptomycota;f__cryptomycota;g__paramicrosporidium;s__fungal sp.;superkingdom__eukaryota	0.621553	0.983091	0.788421	0.113909	0.664375	0.280169	0.933914	0.626849	0.380897	0.0554223	0.0820545	0.0575691	3.88043	0.427027	0.337767	0.0206608	0.153311	0.0550971	0.361617	0.353616	0.0982088	0.0310321	0.0419901	0.00562224	0.314289	0.635161	0.270508	0.0151106	0.140965	0.502646	0.180502	0.14049	0.364677	0.149508	0.522495	0.0342866	0.604765	0.478458	0.373396	0.0104448	0.0193442	0.0054169	0.53264	0.563974	1.4176	1.09557	1.38925	0.438617
OTU_32	minimedusa polyspora ;k__fungi;p__basidiomycota;c__agaricomycetes;o__cantharellales;f__cantharellales;g__minimedusa;s__minimedusa polyspora;superkingdom__eukaryota;subkingdom__dikarya	1.02707	0.518697	0.0337895	0.0198103	0.0138092	0.0839153	0.127502	0.0264866	0.125436	0.0237524	0.175197	0.0800961	0.0438848	0.0390425	1.67732	0.0127144	0.0145381	0.030053	0.0371303	0.32246	1.49952	0.0359319	0.0612829	0.0147584	0.0713473	0.597315	3.82224	0.0207771	2.8121	1.49559	1.11833	0.0430071	0.0207727	2.46847	0.836643	0.0187018	1.95904	0.103197	0.83944	0.015087	0.0154754	0.0162507	0.0356924	0.0309876	0.272894	0.322356	0.0155901	0.0473767
OTU_33	___af128440.1__gi:6940793_ ;k__fungi;p__ascomycota;c__leotiomycetes;o__helotiales;f__helotiales;g__mycoarthris;s__mycoarthris corallinus;superkingdom__eukaryota;subkingdom__dikarya;subphylum__pezizomycotina	0.438104	0.543041	1.22956	0.403635	0.224016	0.355963	0.466957	0.285466	1.32014	0.0260146	0.0809456	0.19148	0.605948	0.62224	0.427966	0.0127144	0.124235	0.0876545	0.360003	0.453313	0.504236	0.033482	0.0669572	0.00913614	0.381121	0.320871	0.606007	0.0604424	0.392687	0.345679	0.690616	1.69735	0.50547	0.211538	0.21323	0.0545469	0.605597	0.455004	0.541846	0.0092843	0.00773769	0.00812535	0.290115	0.364104	0.159389	0.37463	0.121256	0.265921
OTU_34	___x82360.1__gi:1292875_ ;k__fungi;p__ascomycota;c__eurotiomycetes;o__eurotiales;f__aspergillaceae;g__penicillium;s__penicillium paneum;subclass eurotiomycetidae;subphylum__pezizomycotina;subkingdom__dikarya;superkingdom__eukaryota	0.059138	0.132951	0.144544	0.0346681	0.0721146	0.0676737	0.109288	0.173634	0.0826042	0.0316699	0.0410272	0.02503	0.0843939	0.117127	0.142015	0.0301966	0.0383278	0.036314	0.0952473	0.0654267	0.0659611	0.024499	0.107812	0.0112445	0.0541878	0.0888567	0.105393	0.0226659	0.0877433	0.0864198	0.0706312	0.10035	0.0900152	0.103383	0.125334	0.107535	0.0682128	0.161831	0.109492	0.0336556	17.4137	0.0257303	0.0970101	0.0991602	0.11592	0.0936574	0.0779504	0.0947534
OTU_35	gymnoascus sp. 02nh07 ;k__fungi;p__ascomycota;c__eurotiomycetes;o__onygenales;f__gymnoascaceae;g__gymnoascus;s__gymnoascus sp.;subclass eurotiomycetidae;subphylum__pezizomycotina;subkingdom__dikarya;superkingdom__eukaryota	0.0024138	0.00187255	0	0.00495258	0.00153435	0.00270695	0.00496763	0.0058859	0.0107079	0	0.00110884	0.002503	0.00337576	0.00244016	0.00191913	0.00635718	0.00132165	0.00375662	0.00645745	0	0.0014658	0.0024499	0.00226974	0	0.00451565	0	0.00351309	0	0.00431524	0	0.00196198	0.00573427	0.00461617	0.00159051	0.00488313	0.00311696	0.00831864	0.00234538	0.00280749	0.00116054	2.15882	0.0988584	0.0448443	0.0185925	0.0289799	0.0304931	0.0554314	0.0305656
OTU_36	___fj903294.1__gi:237641513_ ;k__fungi;p__ascomycota;c__leotiomycetes;o__helotiales;f__helotiales;g__leptodontidium;s__leptodontidium elatius;superkingdom__eukaryota;subkingdom__dikarya;subphylum__pezizomycotina	0.393449	0.582364	0.495579	0.212961	0.233222	0.0974501	0.569621	0.336968	0.449734	0.0520291	0.0598776	0.0438026	0.680215	0.766209	0.460591	0.0190715	0.11234	0.0538449	0.540811	0.5608	0.342998	0.024499	0.060148	0.0070278	0.505753	0.250115	0.386439	0.03211	0.24453	0.276896	0.364928	0.484546	0.620874	0.216309	0.157888	0.196369	0.378498	0.520675	0.384626	0.0104448	0.0116065	0.0148965	0.641548	0.489604	0.400889	0.352849	0.431326	0.270506
OTU_37	___ab032666.1__gi:7262460_ ;k__fungi;p__basidiomycota;c__tremellomycetes;o__filobasidiales;f__filobasidiales;g__cryptococcus;s__cryptococcus aerius;superkingdom__eukaryota;subkingdom__dikarya	0.306552	0.368893	0.330386	0.148577	0.145764	0.184072	0.356013	0.211892	0.385486	0.111976	0.0975783	0.12515	0.408466	0.341622	0.316656	0.0365538	0.12027	0.0601059	0.405205	0.520298	0.362053	0.0253156	0.21449	0.00491946	0.438018	0.283025	0.396979	0.101996	0.178363	0.410935	0.380624	0.289581	0.364677	0.299015	0.1351	0.197927	0.346887	0.569928	0.320054	0.0127659	0.00580327	0.00812535	0.344111	0.410585	0.466094	0.331068	0.512741	0.348448
OTU_38	___hq671309.1__gi:315115668_ ;k__fungi;p__ascomycota;c__lecanoromycetes;o__lecanorales;f__parmeliaceae;g__parmelia;s__parmelia sp.;suborder__lecanorineae;subclass lecanoromycetidae;subphylum__pezizomycotina;subkingdom__dikarya;superkingdom__eukaryota	0.395863	0.413834	0.396088	0.0841938	0.110474	0.0460181	0.294746	0.12949	0.559873	0.0147039	0.0243946	0.017521	0.411842	0.439228	0.470186	0.0111251	0.0541876	0.0288008	0.363231	0.397233	0.296092	0.00408317	0.0408552	0.0035139	0.374799	0.18265	0.440892	0.0075553	0.0115073	0.0687831	0.304106	0.295315	0.177722	0.00318102	0.0472036	0.0109094	0.225435	0.222811	0.221792	0.00232107	0.00580327	0.00406267	0.182123	0.130148	0.202859	0.182959	0.17842	0.226186
OTU_39	___aj271629.1__gi:11121249_ ;k__fungi;p__fungi;c__mortierellomycotina;o__mortierellales;f__mortierellaceae;g__mortierella;s__mortierella alpina;superkingdom__eukaryota;subphylum__mortierellomycotina	0.298104	0.16853	0.277825	0.116386	0.0859238	0.0825619	0.147373	0.214835	0.275347	0.144777	0.104231	0.176462	0.209297	0.170811	0.261001	0.195483	0.145381	0.135238	0.154979	0.247687	0.309284	0.0253156	0.141858	0.00210834	0.159854	0.23366	0.18795	0.0868859	0.130896	0.167549	0.31784	0.189231	0.279278	0.15746	0.0309265	0.0436375	0.187169	0.208739	0.185294	0.00464215	0.00193442	0.00406267	0.158328	0.111555	0.11109	0.178603	0.237316	0.217016
OTU_40	___fj792583.1__gi:225675529_ ;k__fungi;p__ascomycota;c__pezizomycetes;o__pezizales;f__ascodesmidaceae;g__cephaliophora;s__cephaliophora tropica;subphylum__pezizomycotina;subkingdom__dikarya;superkingdom__eukaryota	0.0253449	0.00561766	0	0	0.00153435	0.00541389	0.00331175	0.0058859	0	0.0033932	0.00221769	0.00375451	0	0	0.0249487	0.00317859	0.0185031	0.00250441	0.0113005	0.0186933	0.0014658	0	0.00113487	0	0.00632191	0.0213914	0	0.00188882	0.00287683	0.0670194	0.00196198	0	0.00692425	0	0.00488313	0	0.0207966	0	0.0505348	0	0.00773769	0	0.0128127	0.0387345	0	0.198205	0	0
OTU_41	rhizomucor pusillus ;k__fungi;p__fungi;c__mucoromycotina;o__mucorales;f__lichtheimiaceae;g__rhizomucor;s__rhizomucor pusillus;superkingdom__eukaryota;subphylum__mucoromycotina	0.580518	0.361403	0.360421	0.0668598	0.0920613	0.0852688	0.374228	0.144205	0.472679	0.0101796	0.0299388	0.020024	0.2228	0.273297	0.230295	0.00953577	0.0766557	0.0288008	0.166279	0.303767	0.341532	0.0163327	0.0749013	0.00562224	0.489497	0.148095	0.319691	0.0207771	0.136649	0.336861	0.221703	0.410001	0.27697	0.287882	0.323914	0.388062	0.454198	0.321317	0.269519	0.00696322	0.0193442	0.00812535	0.357839	0.277339	0.212519	0.280972	0.237316	0.258279
OTU_43	lepiota subincarnata ;k__fungi;p__basidiomycota;c__agaricomycetes;o__agaricales;f__agaricaceae;g__lepiota;s__lepiota subincarnata;subclass agaricomycetidae;subkingdom__dikarya;superkingdom__eukaryota	0.0482759	0.0187255	0.0262807	0.663646	0.0337558	0.0189486	3.48727	10.9934	0.0336536	0.0113107	0.0155238	0.0162695	1.82628	0.0170811	0.0345443	0.0222501	0.00925155	0.0125221	0.0258298	0.0233667	0.0659611	0.0212325	0.0136184	0.0133528	0.0325127	0.0230369	0.042157	0.0113329	0.0201378	0.031746	0.0176578	2.70658	0.0207727	0.0190861	0.011394	0.0296112	0.0557349	0.0656707	0.0308824	0.00812376	0.00773769	0.00947957	0.0128127	0.0247901	0.00965997	0.00217808	0.00692893	0.00611312
OTU_44	___dq339555.1__gi:84873884_ ;k__fungi;p__ascomycota;c__eurotiomycetes;o__eurotiales;f__aspergillaceae;g__penicillium;s__penicillium clavigerum;subclass eurotiomycetidae;subphylum__pezizomycotina;subkingdom__dikarya;superkingdom__eukaryota	0.522587	0.456903	0.730228	0.175817	0.125817	0.182719	0.42556	0.382584	0.613412	0.0180971	0.0609864	0.0625751	0.619451	0.453869	0.564224	0.0190715	0.121592	0.0262963	0.505295	0.482911	0.559937	0.0146994	0.043125	0.00421668	0.364865	0.357072	0.486562	0.0188882	0.0273299	0.169312	0.406129	0.659441	0.362369	0.0143146	0.0651084	0.0280527	0.346055	0.670779	0.463236	0.00696322	0.00773769	0.0054169	0.311164	0.161135	0.241499	0.472643	0.216529	0.434032
OTU_45	morchella vulgaris ;k__fungi;p__ascomycota;c__pezizomycetes;o__pezizales;f__morchellaceae;g__morchella;s__morchella vulgaris;subphylum__pezizomycotina;subkingdom__dikarya;superkingdom__eukaryota	0.00965519	0.0674119	0.886036	0.0222866	0.0138092	0.00541389	0.220231	2.38968	0.36713	0.00565534	0.00554422	0.0112635	0.00337576	0.463629	0.0690886	0.00476788	0.00396495	0.00876545	0.678032	0.746176	0.0469057	0.00408317	0.0034046	0.00281112	0.0921193	0.00329099	2.89654	0	0.0115073	0.00705467	0.0765171	0.0573427	0.00692425	0.00318102	0.00651084	0.00467545	0.00415932	0.0445622	0.0758022	0.00812376	0.00773769	0.00406267	0.00915189	0.0294382	0.0338099	0.903903	0.0571636	0.0412636
OTU_46	___eu040223.1__gi:157062768_ ;k__fungi;p__ascomycota;c__sordariomycetes;o__sordariomycetes;f__sordariomycetes;g__phlogicylindrium;s__phlogicylindrium eucalyptorum;superkingdom__eukaryota;subkingdom__dikarya;subphylum__pezizomycotina	0.00482759	0.0112353	0	0.00742887	0.0184123	0.00676737	0.00496763	0.0147148	0.00458912	0.00113107	0.014415	0.00876051	0.00337576	0.00732047	0.00383826	0.0111251	0.0052866	0.00876545	11.5879	0.00623111	0.0014658	0.0048998	0.00680921	0.00562224	0.00812817	0.00329099	0.00878272	0.00944412	0.00287683	0.00705467	0.00392395	0.00860141	0.00461617	0.0190861	0.24904	0.00935089	0.00582305	0.00703614	0.00561498	0.0092843	0.00386885	0.00812535	0	0	0	0	0.00346446	0
OTU_47	___ay587920.1__gi:51104892_ ;k__fungi;p__ascomycota;c__sordariomycetes;o__sordariales;f__lasiosphaeriaceae;g__lasiosphaeria;s__lasiosphaeria lanuginosa;subclass sordariomycetidae;subphylum__pezizomycotina;subkingdom__dikarya;superkingdom__eukaryota	0.608277	0.258412	0.309737	0.0916227	0.158038	0.0879757	0.192082	0.238379	0.449734	0.0192282	0.0299388	0.0525631	0.32576	0.424587	0.143935	0.0174822	0.0978021	0.0350618	0.26637	0.387887	0.622966	0.015516	0.0363158	0.00281112	0.35764	0.263279	0.103636	0.0132218	0.135211	0.366843	0.529734	0.344056	0.424687	0.162232	0.38414	0.172992	0.329418	0.295518	0.457621	0.00812376	0	0.00947957	0.254423	0.0852158	0.12075	0.263548	0.110863	0.279675
OTU_48	___hq895838.1__gi:323320814_ ;k__fungi;p__ascomycota;c__eurotiomycetes;o__chaetothyriales;f__chaetothyriaceae;g__ceramothyrium;s__ceramothyrium sp.;subclass chaetothyriomycetidae;subphylum__pezizomycotina;subkingdom__dikarya;superkingdom__eukaryota	0.436897	0.408217	0.546263	0.126291	0.135023	0.166477	0.311305	0.307538	1.14269	0.0180971	0.0510068	0.0475571	0.545184	0.529514	0.759975	0.0158929	0.100445	0.0288008	0.405205	0.331807	0.521826	0.015516	0.0351809	0.00773058	0.459693	0.304417	0.537502	0.0151106	0.024453	0.130511	0.33746	0.55049	0.355445	0.0111336	0.0472036	0.0311696	0.504941	0.440932	0.364974	0.0092843	0.00773769	0.0054169	0.195851	0.103808	0.12558	0.49878	0.090076	0.285789
OTU_49	___af220963.1__gi:12963081_ ;k__fungi;p__ascomycota;c__sordariomycetes;o__hypocreales;f__nectriaceae;g__cylindrocladiella;s__cylindrocladiella novaezelandiae;subclass hypocreomycetidae;subphylum__pezizomycotina;subkingdom__dikarya;superkingdom__eukaryota	1.45311	0.85014	0.702071	0.183245	0.116611	0.23009	0.647447	0.310481	0.512452	0.0260146	0.0632041	0.0738386	0.332512	1.61538	0.284031	0.0222501	0.079299	0.0513405	0.301886	0.281958	0.408959	0.0220491	0.0487993	0.00843336	0.721601	0.342263	0.231864	0.0302212	0.268983	0.0828924	0.0529734	0.186364	0.126945	0.165413	0.349958	0.0405205	0.30363	0.161831	0.131952	0.00696322	0.00580327	0.0135422	0.522573	0.212265	0.127995	0.64689	0.204403	0.553238
OTU_50	___hq888730.1__gi:321173749_ ;k__fungi;p__blastocladiomycota;c__blastocladiomycetes;o__blastocladiales;f__blastocladiaceae;g__blastocladiella;s__blastocladiella britannica;superkingdom__eukaryota	0.101379	0.0187255	0.0300351	0.572023	0.363642	0.119106	0.0298058	0.248679	0.119317	0.0135728	0.0232857	0.010012	0.0303818	0.47095	0.68321	0.0190715	0.0079299	0.0237919	0.0500452	0.6309	0.0879482	0.0106162	0.00794407	0.00421668	1.19213	0.00987297	0.00702617	0.0339988	1.39095	0.00352734	0.0235437	0.00860141	0.0415455	0.106564	0.120451	0.216629	0.923369	0.0211084	0.525001	0.0092843	0.00580327	0.00947957	0.293776	0.0867652	0.00241499	0.00435616	0.0207868	0.232299
OTU_51	___hq540524.1__gi:342318662_ ;k__fungi;p__ascomycota;c__leotiomycetes;o__leotiomycetes;f__leotiomycetes;g__bettsia;s__bettsia alvei;superkingdom__eukaryota;subkingdom__dikarya;subphylum__pezizomycotina	0.211207	0.196618	0.309737	0.0866701	0.0644429	0.0554924	0.23679	0.207478	0.25852	0.0124417	0.0487891	0.0237785	0.163724	0.222054	0.163126	0.00476788	0.0370062	0.042575	0.364846	0.194722	0.148046	0.0195992	0.0363158	0.0070278	0.214945	0.14974	0.105393	0.0207771	0.123704	0.261023	0.209932	0.131888	0.249273	0.229033	0.34833	0.166758	0.202975	0.185285	0.233022	0.00232107	0.0212787	0.00677112	0.122635	0.243252	0.241499	0.163356	0.192278	0.134489
OTU_52	___ay198197.1__gi:29569495_ ;k__fungi;p__basidiomycota;c__agaricomycetes;o__russulales;f__albatrellaceae;g__albatrellus;s__albatrellus citrinus;subkingdom__dikarya;superkingdom__eukaryota	0.0024138	1.32577	0.00187719	0	0	0	0	0.00147148	0	0.00113107	0.00554422	0.0012515	0	0	0.00383826	0.00158929	0	0	0.21471	0.0529645	0.0014658	0	0	0	0.00180626	0.0181004	0	0	0	0	0	0	0.00230808	0	0.00162771	0.00155848	0.000831864	0.00469076	0.0842247	0.00116054	0	0.00135422	6.9408	0.00464814	0.00241499	0	0.0155901	0.0168111
OTU_53	___dq491504.1__gi:92430242_ ;k__fungi;p__ascomycota;c__pezizomycetes;o__pezizales;f__ascobolaceae;g__ascobolus;s__ascobolus crenulatus;subphylum__pezizomycotina;subkingdom__dikarya;superkingdom__eukaryota	0.0253449	0.0149804	0.0131404	0.289726	0.115077	0.0189486	0.00827938	0.0206007	0.0275347	0.0180971	0.0155238	0.0112635	0.0151909	0.0292819	0.0211104	0.0206608	0.0145381	0.0137743	0.017758	0.0202511	0.0190554	0.0138828	0.0192928	0.0238945	0.0171595	0.0230369	0.0228351	0.0151106	0.0143841	0.0229277	0.0215817	0.0143357	0.0115404	0.0206766	0.00813855	0.0233772	0.024124	0.0117269	0.0224599	0.0243713	0.172164	14.6852	0	0	0	0	0	0
OTU_54	___aj458187.1__gi:30089122_ ;k__fungi;p__ascomycota;c__sordariomycetes;o__sordariales;f__sordariaceae;g__coronatomyces;s__coronatomyces cubensis;subclass sordariomycetidae;subphylum__pezizomycotina;subkingdom__dikarya;superkingdom__eukaryota	0.0012069	0.00187255	0.00187719	0.00247629	0.00306871	0.00541389	0.00827938	0.00441443	0.0107079	0.00791748	0.00665306	0.00375451	0.00506363	0.00976062	0.0172722	0.00794647	0.0052866	0.00751324	0.00322872	0	0.00586321	0.0024499	0.00453947	0.00562224	0.00270939	0.00164549	0.0122958	0.0245547	0.00287683	0.00705467	0.00784791	0.00286714	0.00461617	0.00159051	0	0.00467545	0.0108142	0.00234538	0.01123	0.00580269	3.19954	0.00947957	0.0183038	0.012395	0.00724498	0.0130685	0.0121256	0.0122262
OTU_55	___eu352772.1__gi:164421753_ ;k__fungi;p__chytridiomycota;c__chytridiomycetes;o__lobulomycetales;f__lobulomycetaceae;g__lobulomyces;s__lobulomyces sp.;superkingdom__eukaryota	0.00482759	0	0.00187719	0.00247629	0.00920613	0	0	0	0.0107079	0	0.00221769	0	0.00168788	0.0122008	0.113229	0.00158929	0.00132165	0.00375662	0.058117	0.0872356	0	0.00163327	0	0.00070278	0.111085	0.0526558	0.0737748	0	0.00287683	0	0.1393	0.083147	0.21696	0	0	0	0.0249559	0.0609799	0.174064	0.00116054	0	0.00135422	0.00274557	0.00464814	0	0.00653424	0	0
OTU_56	___ay061726.1__gi:22024505_ ;k__fungi;p__basidiomycota;c__agaricomycetes;o__russulales;f__russulaceae;g__russula;s__russula violeipes;subkingdom__dikarya;superkingdom__eukaryota	0.656553	0.138569	0.202737	0.138672	0.211741	0.158356	0.882582	0.113304	0.169797	0.00226214	0.0365919	0.0375451	0.133342	0.422147	0.201508	0.00317859	0.0581526	0.0150265	0.0661888	0.244571	0.187623	0.00816633	0.0295066	0.00421668	0.245651	0.0839202	0.135254	0.0075553	0.0302067	0.0917108	0.196198	0.0114685	0.274662	0.0811159	0.169282	0.00779241	0.0989918	0.175904	0.0252674	0.00464215	0.0174098	0.00270845	0.476814	0.653838	0.410549	0.461753	0.38802	0.20479
OTU_57	___ay492087.1__gi:46325824_ ;k__fungi;p__fungi;c__mucoromycotina;o__mucorales;f__mucoraceae;g__actinomucor;s__actinomucor elegans;superkingdom__eukaryota;subphylum__mucoromycotina;suborder__mucorineae;varietas actinomucor elegans var. meitauzae	0.0036207	0.0411962	0.00563158	0.118862	0.197932	0.370852	0.0149029	0.0176577	0.0122377	2.43745	1.71538	2.15634	0.00843939	0.0146409	0.00383826	1.07277	0.407068	0.460812	0.0161436	0.0171356	0.0102606	0.0751303	0.0295066	0.0759003	0.0108376	0.00822747	0.00878272	0.844304	0.466046	0.0229277	0.00392395	0.0516085	0.00461617	0.0286291	0.0179048	0.10286	0.00998236	0.00703614	0.00842247	0.00348161	0.00580327	0.617526	0.0082367	0.0232407	0.012075	0.0152466	0.0485025	0.0611312
OTU_58	___aj271630.1__gi:11121250_ ;k__fungi;p__fungi;c__mortierellomycotina;o__mortierellales;f__mortierellaceae;g__mortierella;s__mortierella alpina;superkingdom__eukaryota;subphylum__mortierellomycotina	0.114655	0.132951	0.116386	0.0198103	0.0414276	0.0433111	0.137438	0.130961	0.143792	0.108583	0.0365919	0.108881	0.129967	0.0561236	0.0959564	0.0953577	0.0766557	0.279242	0.0904042	0.107487	0.0630295	0.0073497	0.0658223	0	0.0596066	0.0526558	0.0790444	0.0151106	0.0345219	0.0246914	0.117719	0.103217	0.117712	0.0540773	0.00162771	0.00623393	0.073204	0.0609799	0.12353	0.00348161	0.00193442	0.00135422	0.105247	0.122401	0.0652048	0.0566301	0.145507	0.110036
OTU_59	neonectria sp. chtaf1 ;k__fungi;p__ascomycota;c__sordariomycetes;o__hypocreales;f__nectriaceae;g__neonectria;s__neonectria sp.;subclass hypocreomycetidae;subphylum__pezizomycotina;subkingdom__dikarya;superkingdom__eukaryota	0.132759	0.155422	0.165193	0.0495258	0.0598398	0.0554924	0.0960408	0.272223	0.20804	0.0723884	0.0476803	0.0988686	0.13503	0.239135	0.145854	0.0826433	0.124235	0.160282	0.158207	0.908185	0.115798	0.0596142	0.0397204	0.00843336	0.133663	0.195814	0.061479	0.06422	0.0445908	0.0458554	0.229551	0.2007	0.159258	0.0540773	0.0602253	0.0311696	0.181346	0.2791	0.160027	0.00696322	0	0.00270845	0.170225	0.168882	0.113505	0.165534	0.242512	0.18645
OTU_60	___aj890438.1__gi:62718903_ ;k__fungi;p__ascomycota;c__sordariomycetes;o__hypocreales;f__bionectriaceae;g__clonostachys;s__clonostachys sp.;subclass hypocreomycetidae;subphylum__pezizomycotina;subkingdom__dikarya;superkingdom__eukaryota	0.292069	0.234069	0.315369	0.0965753	0.0859238	0.0812084	0.24507	0.175106	0.15756	0.124417	0.0665306	0.0650781	0.207609	0.183012	0.159288	0.0953577	0.0607959	0.106438	0.221168	0.15422	0.156841	0.0743136	0.107812	0.00281112	0.200495	0.23366	0.128228	0.38532	0.083428	0.031746	0.1393	0.275245	0.343904	0.243348	0.039065	0.0233772	0.227099	0.330699	0.160027	0.00812376	0	0.0054169	0.254423	0.0867652	0.176294	0.322356	0.121256	0.229242
OTU_61	___eu414289.1__gi:172055337_ ;k__fungi;p__basidiomycota;c__agaricomycetes;o__boletales;f__boletaceae;g__octaviania;s__octaviania sp.;subfamily__leccinoideae;suborder__boletineae;subclass agaricomycetidae;subkingdom__dikarya;superkingdom__eukaryota	0.853277	0.269648	0.506842	0.0643835	0.0935956	0.0812084	0.107632	0.242793	0.175916	0.00678641	0.0454626	0.027533	0.234615	0.200093	0.189994	0.0174822	0.0634392	0.030053	0.159822	0.0825622	0.0982088	0.00653307	0.0385855	0.00632502	0.619547	0.108603	0.124715	0.0264435	0.128019	0.29806	0.0706312	0.123287	0.256197	0.167003	0.185559	0.252474	0.369347	0.173558	0.179679	0.00232107	0.00773769	0.00406267	0.453934	0.206067	0.241499	0.11326	0.239048	0.223129
OTU_62	___gu062211.1__gi:262034945_ ;k__fungi;p__basidiomycota;c__agaricomycetes;o__corticiales;f__corticiaceae;g__sistotrema;s__sistotrema sp.;subkingdom__dikarya;superkingdom__eukaryota	0.137586	0.0280883	0.00750878	0.00495258	0.0122748	0.00812084	0.0380851	0.0103003	0.00611883	0.177578	0.00776191	0.00500601	0.0101273	0.0146409	0.00767651	0.00476788	0.0052866	0.00751324	0.00484308	0.00467333	0.285832	0.0073497	0.00907894	0.00421668	0.013547	9.68867	0.00351309	0.00377765	0.00143841	0	0.0255057	0.00573427	0.027697	0.0111336	0.00813855	0.0109094	0.233754	0.0281446	0.0449198	0.0104448	0.0116065	0.0108338	0.191275	0	0	0.0152466	0.0242512	0
OTU_63	___fj748922.1__gi:262092197_ ;k__fungi;p__ascomycota;c__sordariomycetes;o__hypocreales;f__ceratostomataceae;g__sphaerodes;s__sphaerodes sp.;subclass hypocreomycetidae;subphylum__pezizomycotina;subkingdom__dikarya;superkingdom__eukaryota	0.584139	0.367021	0.152053	0.0990516	0.162642	0.0500785	0.276531	0.241322	0.165208	0.00565534	0.0310476	0.012515	0.330824	0.102487	0.0345443	0.00476788	0.0145381	0.0100177	0.0516596	0.437736	0.0542347	0.00653307	0.0113487	0.00140556	0.112891	0.0921477	0.0245916	0.00188882	0.0345219	0.00176367	0.0156958	0.151958	0.0161566	0.00636203	0.0455759	0.0155848	0.0141417	0.0281446	0.01123	0.00232107	0.00386885	0.00270845	0.84472	0.926528	0.183539	0.468287	0.157633	0.207846
OTU_64	___ef601608.1__gi:148633610_ ;k__fungi;p__ascomycota;c__sordariomycetes;o__hypocreales;f__nectriaceae;g__cylindrocarpon;s__cylindrocarpon sp.;subclass hypocreomycetidae;subphylum__pezizomycotina;subkingdom__dikarya;superkingdom__eukaryota;	0.00965519	0.00749022	0.0131404	0.00247629	0.00306871	0.00270695	0.0115911	0.0132433	0.00611883	0.00791748	0.00221769	0.00375451	0.00337576	0.0195212	0.074846	0.0588039	0.0568309	0.0475839	0.0629601	0.303767	0.0938114	0.0718637	0.106678	0.00070278	0.0433503	0.0937932	0.0632356	0.0793306	0.0330835	0.0970018	0.510114	0.22077	0.189263	0.165413	0.190442	0.168316	0.214621	0.267373	0.179679	0.00116054	0.00580327	0.0054169	0.0082367	0.0201419	0.00724498	0.00871232	0.0155901	0.010698
OTU_65	___ab111493.1__gi:31559704_ ;k__fungi;p__ascomycota;c__sordariomycetes;o__hypocreales;f__nectriaceae;g__mariannaea;s__mariannaea elegans;varietas mariannaea elegans var. punicea;subclass hypocreomycetidae;subphylum__pezizomycotina;subkingdom__dikarya;superkingdom__eukaryota	0.156897	0.16853	0.15393	0.0718124	0.052168	0.112338	0.115911	0.206007	0.20651	0.121024	0.0454626	0.0425511	0.155285	0.104927	0.134339	0.096947	0.0647608	0.565998	0.0742606	0.0825622	0.0469057	0.0302154	0.0635526	0.00632502	0.196882	0.0427829	1.63885	0.0849971	0.11795	0.0335097	0.384547	0.0688113	0.140793	0.0922495	0.0162771	0.188576	0.178851	0.117269	0.233022	0.00232107	0.00193442	0.0054169	0.116229	0.154938	0.14007	0.178603	0.0935405	0.131432
OTU_66	___ay157495.1__gi:37196414_ ;k__fungi;p__fungi;c__mortierellomycotina;o__mortierellales;f__mortierellaceae;g__mortierella;s__mortierella hyalina;superkingdom__eukaryota;subphylum__mortierellomycotina	0.189483	0.179765	0.206491	0.0866701	0.127351	0.0974501	0.155652	0.144205	0.275347	0.231869	0.129735	0.265318	0.0945211	0.148849	0.107471	0.936094	0.0647608	0.270477	0.216324	0.169798	0.184691	0.0106162	0.0238322	0.00210834	0.120116	0.159613	0.154576	0.132218	0.0776744	0.0458554	0.221703	0.189231	0.18003	0.120879	0.0162771	0.0249357	0.0931687	0.166522	0.235829	0.00348161	0.00386885	0.00270845	0.101586	0.12395	0.108675	0.130685	0.0692893	0.201733
OTU_67	___ab459518.1__gi:260161897_ ;k__fungi;p__basidiomycota;c__agaricomycetes;o__russulales;f__russulaceae;g__russula;s__russula siamensis;subkingdom__dikarya;superkingdom__eukaryota	0.188276	0.151677	0.0300351	0.0272392	0.0690459	0.0243625	0.0877614	0.0338439	0.174387	0.00452427	0.00665306	0.010012	0.236303	0.185452	0.074846	0.00476788	0.0118948	0.00751324	0.190495	0.172913	0.0982088	0.0122495	0.00794407	0.00140556	0.243845	0.220496	0.061479	0.0075553	0.0604134	0.0687831	0.17854	0.298182	0.0461617	0.0683918	0.0227879	0.0140263	0.251223	0.0914699	0.0561498	0.00116054	0.313377	0.00406267	0.29103	0.19987	0.113505	0.0893013	0.0658248	0.0703009
OTU_68	___aj279445.1__gi:6706190_ ;k__fungi;p__ascomycota;c__saccharomycetes;o__saccharomycetales;f__dipodascaceae;g__galactomyces;s__galactomyces geotrichum;subphylum__saccharomycotina;subkingdom__dikarya;superkingdom__eukaryota	0.0036207	0	0.00750878	0	0.00920613	0.00406042	0.00496763	0.00441443	0.0122377	0.00565534	0.0255034	0.0237785	0.00506363	0	0.00383826	0.00476788	0.0026433	0.00250441	0.00161436	0.00311556	0.00439741	0.0375651	0.0147533	0.00210834	0.00361252	0.00493648	0.00526963	0.0113329	0.0158226	0.00529101	0.00392395	0.00286714	0.00230808	0.00636203	0.00813855	0.00935089	0.00415932	0.00469076	0.0140375	0.459573	0.938195	0.0054169	0.0155582	0.012395	0.00965997	0.00435616	0.00692893	0.0076414
OTU_69	___gu062252.1__gi:262034986_ ;k__fungi;p__ascomycota;c__sordariomycetes;o__coniochaetales;f__coniochaetaceae;g__coniochaeta;s__lecythophora sp.;subclass sordariomycetidae;subphylum__pezizomycotina;subkingdom__dikarya;superkingdom__eukaryota	0.0398277	0.0280883	0.0788421	0.0297155	0.0153435	0.00676737	0.0480204	0.0750452	0.05201	0.032801	0.0166327	0.0187725	0.128279	0.0366023	0.0710077	0.0143037	0.048901	0.0200353	0.0629601	0.0778889	0.0278503	0.0163327	0.122566	0.00070278	0.0876036	0.0345554	0.061479	0.0245547	0.0359604	0.112875	0.0451255	0.0974827	0.0600102	0.0556678	0.0455759	0.0545469	0.0341064	0.0445622	0.0140375	0.0092843	0.0831802	0.00406267	0.0777911	0.0557776	0.0458849	0.0566301	0.0381091	0.0336222
OTU_70	___hm051080.1__gi:296785429_ ;k__fungi;p__ascomycota;c__leotiomycetes;o__helotiales;f__leotiaceae;g__neobulgaria;s__neobulgaria pura;subphylum__pezizomycotina;subkingdom__dikarya;superkingdom__eukaryota	0.252242	0.177893	0.131404	0.0841938	0.0429619	0.0595528	0.117567	0.332553	0.151441	0.00791748	0.021068	0.0262815	0.173851	0.261097	0.147773	0.00476788	0.0436144	0.0701236	0.133992	0.176029	0.366451	0.0318487	0.0238322	0.0035139	0.307064	0.465675	0.166872	0.0566647	0.0920585	0.137566	0.235437	0.172028	0.279278	0.111336	0.195325	0.115328	0.47749	0.337735	0.143182	0.00232107	0.00967212	0.00135422	0.226052	0.089864	0.156974	0.11326	0.0727537	0.120734
OTU_71	___am901691.1__gi:163257626_ ;k__fungi;p__ascomycota;c__eurotiomycetes;o__eurotiales;f__aspergillaceae;g__eurotium;s__eurotium sp.;subclass eurotiomycetidae;subphylum__pezizomycotina;subkingdom__dikarya;superkingdom__eukaryota	0.012069	0.0149804	0.0150176	4.63809	3.88345	5.41795	0.0198705	0.0147148	0.00917824	0.0429806	0.0598776	0.0400481	0.013503	0.0170811	0.00575738	0.0174822	0.048901	0.0237919	0.00645745	0.0171356	0.00879482	0.0097996	0.0385855	0.0857392	0.0117407	0.00822747	0.0122958	0.00944412	0.0230146	0.047619	0.0176578	0.0143357	0.00461617	0.0429437	0.00976626	0.0233772	0.0174691	0.018763	0.00561498	0.0162475	0.0154754	0.0135422	0	0	0	0	0	0.00152828
OTU_72	___ab067714.1__gi:29466986_ ;k__fungi;p__ascomycota;c__sordariomycetes;o__hypocreales;f__ophiocordycipitaceae;g__ophiocordyceps;s__ophiocordyceps crassispora;subclass hypocreomycetidae;subphylum__pezizomycotina;subkingdom__dikarya;superkingdom__eukaryota	0.13638	0.132951	0.279702	0.0520021	0.0889925	0.0703806	0.221887	0.123604	0.338065	0.0610777	0.0277211	0.0412996	0.229551	0.402626	0.228376	0.054036	0.048901	0.0864023	0.133992	0.149547	0.246255	0.0220491	0.0385855	0.00843336	0.180626	0.204041	0.172141	0.0302212	0.0805512	0.116402	0.243285	0.321119	0.28851	0.112926	0.0699915	0.0623393	0.186337	0.222811	0.157219	0.0104448	0.00580327	0.0054169	0.185783	0.128598	0.142485	0.10237	0.107398	0.0886403
OTU_73	___jf908413.1__gi:344333370_ ;k__fungi;p__basidiomycota;c__agaricomycetes;o__agaricales;f__tricholomataceae;g__mycena;s__mycena maurella;subclass agaricomycetidae;subkingdom__dikarya;superkingdom__eukaryota	0	0	0	0.00247629	0.00306871	0.00135347	0.00331175	0.00294295	0.00305941	0	0.00554422	0.0012515	0.00337576	0.00488031	0	0	0	0	0	0	0	0	0.25421	0.00070278	0	0	0.00351309	0.00188882	0	0.0405644	0.374738	0	0	0	0	0.00155848	0.00166373	0.00234538	0	0.00232107	0	0	0.0082367	0.00929627	0.00724498	0.0108904	0.00692893	0.00458484
OTU_74	___hq604827.1__gi:315270817_ ;k__fungi;p__basidiomycota;c__agaricomycetes;o__hymenochaetales;f__tubulicrinaceae;g__grandinia;s__grandinia barba_jovis;subkingdom__dikarya;superkingdom__eukaryota	0.223276	0.312717	0.452404	0.0594309	0.0629085	0.0785014	0.324552	0.0456157	0.252402	0.00452427	0.0277211	0.017521	0.170476	0.231815	0.234134	0.00953577	0.0422928	0.0200353	0.267984	0.174471	0.175896	0.0138828	0.0272368	0.00210834	0.26823	0.174422	0.145793	0.0113329	0.083428	0.202822	0.121643	0.318252	0.173106	0.190861	0.214858	0.160524	0.20547	0.27441	0.120722	0.00116054	0.0116065	0.00812535	0.285539	0.137895	0.0941847	0.324534	0.124721	0.201733
OTU_75	___ay997073.1__gi:62866679_ ;k__fungi;p__fungi;c__zoopagomycotina;o__zoopagales;f__piptocephalidaceae;g__piptocephalis;s__piptocephalis corymbifera;superkingdom__eukaryota;subphylum__zoopagomycotina	0.417587	0.129206	0.144544	0.0321918	0.0583055	0.0527854	0.0596115	0.108889	0.238634	0.00904855	0.0155238	0.0112635	0.126591	0.126888	0.090199	0.0111251	0.0198247	0.00751324	0.0597314	0.11216	0.180294	0	0.0158881	0.00070278	0.375702	0.0724018	0.0649921	0.00566647	0.0359604	0.0511464	0.086327	0.151958	0.0738587	0.128831	0.00651084	0.0467545	0.178851	0.126651	0.0982622	0.00232107	0	0.00270845	0.587552	0.089864	0.11109	0.082767	0.0381091	0.177281
OTU_76	___fj903315.1__gi:237641534_ ;k__fungi;p__ascomycota;c__eurotiomycetes;o__chaetothyriales;f__herpotrichiellaceae;g__phialophora;s__phialophora sp.;subclass chaetothyriomycetidae;subphylum__pezizomycotina;subkingdom__dikarya;superkingdom__eukaryota	0.0941381	0.16104	0.138912	0.0495258	0.0383589	0.0351903	0.129158	0.0397298	0.143792	0.0135728	0.0133061	0.0212755	0.0742666	0.0732047	0.142015	0.0127144	0.0211464	0.0150265	0.156593	0.0856778	0.0747559	0.00326653	0.0283717	0.00210834	0.0984412	0.0970842	0.0825575	0.0358877	0.102127	0.220459	0.137338	0.154825	0.214652	0.119288	0.159516	0.163641	0.067381	0.204048	0.103877	0.00116054	0.00773769	0.00812535	0.0805367	0.0774689	0.0748648	0.100192	0.112595	0.0840554
OTU_77	___hq829119.1__gi:327532868_ ;k__fungi;p__ascomycota;c__dothideomycetes;o__pleosporales;f__pleosporaceae;g__ulocladium;s__ulocladium sp.;suborder__pleosporineae;subclass pleosporomycetidae;subphylum__pezizomycotina;subkingdom__dikarya;superkingdom__eukaryota	0.0868967	0.125461	0.112632	0.262487	0.334489	0.200314	0.0496763	0.203064	0.126966	0.490884	0.167435	0.798458	0.0742666	0.114687	0.0134339	0.192305	0.0726907	0.202858	0.0258298	0.0311556	0.0791534	0.0408317	0.0124835	0.01265	0.0424471	0.00493648	0.0175654	0.409875	0.00143841	0	0.0549354	0.0401399	0.0300051	0.0302196	0.00325542	0.00311696	0.0341064	0.0633253	0.0393049	0.00348161	0.00193442	0.0054169	0.0933493	0.0309876	0.0772798	0.111082	0.0467703	0.0580747
OTU_78	___eu035420.1__gi:157325616_ ;k__fungi;p__ascomycota;c__eurotiomycetes;o__chaetothyriales;f__herpotrichiellaceae;g__exophiala;s__exophiala sp.;subclass chaetothyriomycetidae;subphylum__pezizomycotina;subkingdom__dikarya;superkingdom__eukaryota	0.695174	0.129206	0.138912	0.0544784	0.0613742	0.0609063	0.135782	0.0853456	0.10249	0.0147039	0.0288299	0.017521	0.0877696	0.063444	0.859769	0.00158929	0.048901	0.0200353	0.0645745	0.165124	0.0600979	0.0024499	0.0147533	0.00421668	0.149016	0.106957	0.0843141	0.00566647	0.00143841	0.00352734	0.255057	0.0974827	0.140793	0.00159051	0	0.00155848	0.127275	0.143068	0.300401	0.00116054	0	0	0.173886	0.10071	0.0700348	0.211274	0.0554314	0.0657161
OTU_79	___af383963.1__gi:14579569_ ;k__fungi;p__ascomycota;c__dothideomycetes;o__pleosporales;f__massarinaceae;g__massarina;s__massarina rubi;suborder__massarineae;subclass pleosporomycetidae;subphylum__pezizomycotina;subkingdom__dikarya;superkingdom__eukaryota	0.115862	0.117971	0.193351	0.0420969	0.0506337	0.0419577	0.117567	0.0868171	0.163679	0.00904855	0.0565511	0.017521	0.123215	0.251336	0.0690886	0.00158929	0.0317196	0.0212875	0.104933	0.102813	0.109935	0.00571643	0.017023	0.00210834	0.0803786	0.171131	0.140523	0.704531	0.0647286	0.0864198	0.0902509	0.0802798	0.175414	0.101793	0.0992903	0.135588	0.0873457	0.0844337	0.120722	0.00580269	0.00967212	0.00135422	0.152837	0.227759	0.142485	0.121972	0.0796827	0.0779423
OTU_80	___gu566260.1__gi:291498448_ ;k__fungi;p__ascomycota;c__sordariomycetes;o__xylariales;f__amphisphaeriaceae;g__truncatella;s__truncatella angustata;subclass xylariomycetidae;subphylum__pezizomycotina;subkingdom__dikarya;superkingdom__eukaryota	0.0603449	0.0674119	0.0825965	0.0272392	0.0398932	0.0311299	0.0728585	0.0323725	0.0443615	0.0260146	0.0177415	0.0438026	0.0708909	0.0585637	0.059493	0.00953577	0.0118948	0.00626104	0.0226011	0.0436178	0.0381109	0.00326653	0.0034046	0.00070278	0.0803786	0.0510103	0.0948533	0	0.0186994	0	0.0372776	0.0802798	0.117712	0.0174956	0.00488313	0.00155848	0.108974	0.197012	0.0645723	0.00232107	0.00193442	0.00270845	0.0951797	0.130148	0.10143	0.0631643	0.154169	0.0779423
OTU_81	___hq630279.1__gi:325516852_ ;k__fungi;p__fungi;c__mortierellomycotina;o__mortierellales;f__mortierellaceae;g__mortierella;s__mortierella angusta;superkingdom__eukaryota;subphylum__mortierellomycotina	0.160518	0.0599217	0.176456	0.0594309	0.0767177	0.0676737	0.198705	0.0338439	0.195802	0.0520291	0.0410272	0.0738386	0.129967	0.0756448	0.074846	0.042911	0.0594742	0.0388184	0.137221	0.0763311	0.117264	0.00326653	0.0295066	0.00140556	0.136373	0.0625288	0.0649921	0.0113329	0.0891817	0.0405644	0.17854	0.103217	0.117712	0.0270386	0.00162771	0.0218187	0.0598942	0.0961606	0.0982622	0.00116054	0.00193442	0.00406267	0.0924341	0.0340863	0.0289799	0.11326	0.114327	0.197148
OTU_82	___aj269851.1__gi:317416175_ ;k__fungi;p__ascomycota;c__sordariomycetes;o__hypocreales;f__nectriaceae;g__nectria;s__nectria sp.;subclass hypocreomycetidae;subphylum__pezizomycotina;subkingdom__dikarya;superkingdom__eukaryota	0.0036207	0.138569	0.319123	0.0817176	0.0690459	0.0324834	0.0678909	0.178049	0.489506	0.0429806	0.0620953	0.0525631	0.288627	0.351382	1.41248	0.0301966	0.052866	0.036314	0.143678	0.129296	0.357656	0.0204158	0.0295066	0.00421668	0.00451565	0.870467	0.14228	0.0151106	0.188432	0.0229277	0.200122	0.249441	0.244657	0.119288	0.0439482	0.0358451	0.0166373	0.394024	3.05736	0.0104448	0.0116065	0.00406267	0.0256253	0.10071	0.14007	0.280972	0.176688	0.250638
OTU_83	geomyces sp. 11ma07 ;k__fungi;p__ascomycota;c__leotiomycetes;o__leotiomycetes;f__pseudeurotiaceae;g__geomyces;s__geomyces sp.;superkingdom__eukaryota;subkingdom__dikarya;subphylum__pezizomycotina	0.0844829	0.0655394	0.122018	0.0222866	0.0291527	0.0243625	0.079482	0.0338439	0.10555	0.0124417	0.00887075	0.0137665	0.0540121	0.114687	0.0614121	0.00476788	0.0171814	0.0100177	0.0371303	0.0825622	0.0527689	0.00408317	0.0102138	0.00070278	0.0496722	0.0329099	0.0456701	0.00377765	0.0445908	0.0335097	0.0647452	0.0573427	0.0369293	0.0302196	0.0260434	0.042079	0.054903	0.0562891	0.0561498	0	0	0.00135422	0.0942645	0.0790183	0.0796947	0.0696986	0.0519669	0.0641878
OTU_84	geomyces destructans ;k__fungi;p__ascomycota;c__leotiomycetes;o__leotiomycetes;f__pseudeurotiaceae;g__pseudogymnoascus;s__geomyces destructans;superkingdom__eukaryota;subkingdom__dikarya;subphylum__pezizomycotina	0.0844829	0.155422	0.105123	0.0346681	0.0276184	0.025716	0.0943849	0.0691593	0.137674	0.00226214	0.0099796	0.00500601	0.0928333	0.134209	0.213023	0.00794647	0.0687258	0.0250441	0.21471	0.289747	0.206678	0.0106162	0.0646875	0.00210834	0.292614	0.212269	0.180924	0.0075553	0.281929	0.38448	0.282525	0.263777	0.447768	0.578945	0.572954	0.403647	0.35687	0.328353	0.418316	0.00348161	0.0154754	0.00270845	0.117144	0.257197	0.161804	0.141575	0.103934	0.102395
OTU_85	___jn418771.1__gi:346068483_ ;k__fungi;p__ascomycota;c__dothideomycetes;o__pleosporales;f__sporormiaceae;g__preussia;s__preussia sp.;subclass pleosporomycetidae;subphylum__pezizomycotina;subkingdom__dikarya;superkingdom__eukaryota	0.423621	0.293991	0.238404	0.4804	0.104336	0.0622598	0.00496763	0.00735738	0.0489506	0.0101796	0.00443538	0.020024	0.2785	0.795491	0.00959564	0.0127144	0.0343629	0.00500883	0.00322872	0.00934667	0.0513031	0.00816633	0.0204276	0.00210834	0.062316	0.013164	0.121201	0.00944412	0.00719207	0.234568	0.0804411	0.0917484	0.0692425	0.201994	0.00813855	0.00311696	0.042425	0.963951	0.0336899	0.00348161	0.0193442	0.0148965	0.21507	0.119302	0.173879	0.0936574	0.0381091	0.0809989
OTU_86	___af139627.1__gi:5814281_ ;k__fungi;p__basidiomycota;c__tremellomycetes;o__cystofilobasidiales;f__cystofilobasidiaceae;g__cystofilobasidium;s__cystofilobasidium capitatum;subkingdom__dikarya;superkingdom__eukaryota	0.24138	0.60109	0.352912	0.121338	0.0598398	0.146175	0.420592	0.210421	0.174387	0.00678641	0.0277211	0.0287845	0.0860818	0.348942	0.15353	0.00794647	0.022468	0.0375662	0.098476	0.204069	0.0908798	0.00326653	0.0397204	0.00210834	0.126438	0.0411374	0.00351309	0.00566647	0.00719207	0.0511464	0.0431635	0.02007	0.136177	0.0349912	0.0244157	0.00467545	0.186337	0.0609799	0.0140375	0	0	0.00406267	0.287369	0.147191	0.0676198	0.0784109	0.0536992	0.0611312
OTU_87	___ab190397.1__gi:307548391_ ;k__fungi;p__ascomycota;c__eurotiomycetes;o__chaetothyriales;f__herpotrichiellaceae;g__exophiala;s__exophiala heteromorpha;subclass chaetothyriomycetidae;subphylum__pezizomycotina;subkingdom__dikarya;superkingdom__eukaryota	0.0555173	0.0599217	0.0938597	0.00495258	0.0153435	0.0270695	0.0380851	0.0573875	0.0841339	0.0113107	0.00332653	0.00500601	0.160348	0.078085	0.0959564	0.00158929	0.0158598	0.00500883	0.040359	0.0327133	0.0864824	0.0048998	0.0158881	0	0.0876036	0.0246824	0.0210785	0.00188882	0.0575366	0.0758377	0.0627833	0.114685	0.0507778	0.0445342	0.073247	0.0155848	0.0690447	0.114924	0.359359	0.00232107	0.00580327	0.00135422	0.0375228	0.00619751	0.00482998	0.0479178	0.0935405	0.102395
OTU_88	___ay706329.1__gi:51340262_ ;k__fungi;p__ascomycota;c__leotiomycetes;o__leotiomycetes;f__leotiomycetes;g__leohumicola;s__leohumicola minima;superkingdom__eukaryota;subkingdom__dikarya;subphylum__pezizomycotina	0.0989657	0.136696	0.165193	0.0420969	0.0337558	0.0460181	0.0877614	0.132433	0.201921	0.0101796	0.0332653	0.020024	0.116464	0.15617	0.214942	0.0127144	0.0303979	0.00876545	0.0952473	0.0778889	0.109935	0.00571643	0.0317763	0.00070278	0.188754	0.0740473	0.288073	0.00377765	0.0503445	0.0776014	0.0725931	0.103217	0.0900152	0.0349912	0.0423205	0.0171433	0.137258	0.131341	0.179679	0	0.00386885	0.00406267	0.0887734	0.0790183	0.0434699	0.0740547	0.0796827	0.117678
OTU_89	leucosporidium drummii ;k__fungi;p__basidiomycota;c__microbotryomycetes;o__leucosporidiales;f__leucosporidiaceae;g__leucosporidium;s__leucosporidium drummii;subphylum__pucciniomycotina;subkingdom__dikarya;superkingdom__eukaryota	0.296897	0.200363	0.279702	0.0866701	0.0368245	0.051432	0.231823	0.0985889	0.140733	0.0294078	0.0188504	0.0137665	0.158661	0.16349	0.138177	0.00794647	0.048901	0.0475839	0.116234	0.105929	0.102606	0.0114329	0.0363158	0.00421668	0.149016	0.0724018	0.100123	0.0075553	0.0316451	0.238095	0.349232	0.237972	0.16849	0.0954305	0.120451	0.0654562	0.162213	0.199357	0.126337	0.00232107	0	0.0054169	0.0896886	0.0511295	0.0241499	0.117616	0.0381091	0.102395
OTU_90	___af444400.1__gi:20378461_ ;k__fungi;p__basidiomycota;c__tremellomycetes;o__cystofilobasidiales;f__cystofilobasidiaceae;g__cystofilobasidium;s__cystofilobasidium infirmominiatum;subkingdom__dikarya;superkingdom__eukaryota	0.305345	0.318334	0.343526	0.217913	0.09513	0.0933896	0.500075	0.163334	0.385486	0.015835	0.0421361	0.0262815	0.227863	0.202533	0.124743	0.00953577	0.0449361	0.0262963	0.0597314	0.11216	0.18176	0.00571643	0.0385855	0.0035139	0.211332	0.0724018	0.0298612	0.00377765	0.00863049	0.0352734	0.0431635	0.194965	0.0877072	0.00954305	0.0358096	0.0592223	0.0632216	0.0914699	0.0926472	0.00348161	0.00193442	0.00270845	0.137278	0.168882	0.108675	0.0675205	0.0831471	0.0626595
OTU_91	tetracladium sp. wmm_2012a ;k__fungi;p__ascomycota;c__ascomycota;o__ascomycota;f__ascomycota;g__tetracladium;s__tetracladium sp.;superkingdom__eukaryota;subkingdom__dikarya	0.154483	0.127334	0.135158	0.0272392	0.0414276	0.0649667	0.0993526	0.126547	0.131555	0.0147039	0.0410272	0.0162695	0.155285	0.134209	0.180398	0.00476788	0.0185031	0.0162787	0.108162	0.119949	0.11873	0.00408317	0.0306414	0.0035139	0.108376	0.138222	0.129984	0.00944412	0.125142	0.165785	0.103985	0.114685	0.163874	0.0858874	0.0927795	0.132471	0.141417	0.0797429	0.143182	0.00116054	0.00967212	0.00135422	0.115314	0.0821171	0.10626	0.0849451	0.0710215	0.0855837
OTU_92	mortierella sp. 07ma06 ;k__fungi;p__fungi;c__mortierellomycotina;o__mortierellales;f__mortierellaceae;g__mortierella;s__mortierella sp.;superkingdom__eukaryota;subphylum__mortierellomycotina	0.168966	0.17602	0.152053	0.0420969	0.0414276	0.0460181	0.125847	0.0985889	0.204981	0.0248835	0.0399184	0.0312875	0.170476	0.134209	0.159288	0.0349645	0.0396495	0.0325574	0.187266	0.12618	0.117264	0.0106162	0.0363158	0	0.141791	0.113539	0.0860706	0.0113329	0.0863049	0.0987654	0.123605	0.0774127	0.136177	0.128831	0.0797578	0.127796	0.158054	0.150104	0.210562	0	0.00386885	0	0.12172	0.130148	0.11592	0.124151	0.0779504	0.0840554
OTU_93	___ay999116.1__gi:67644091_ ;k__fungi;p__ascomycota;c__sordariomycetes;o__sordariales;f__lasiosphaeriaceae;g__schizothecium;s__schizothecium glutinans;subclass sordariomycetidae;subphylum__pezizomycotina;subkingdom__dikarya;superkingdom__eukaryota	0.00844829	0.00374511	0.0187719	0.00495258	0.00767177	0.00541389	0.00496763	0.00882885	0.00917824	0.00904855	0.00332653	0.00750901	0.0236303	0.00488031	0.00959564	0.00476788	0.00660825	0.00626104	0.00807181	0.00778889	0.00879482	0.0130661	0.00907894	0.00773058	0.00722504	0.00658198	0.00351309	10.4546	0.0115073	0.00881834	0.00588593	0.00860141	0.0207727	0.00636203	0.00976626	0.0389621	0.012478	0.00234538	0.01123	0.0092843	0.050295	0.0108338	0.00274557	0	0	0.00217808	0	0.00458484
OTU_94	___x65480.1__gi:2734_ ;k__fungi;p__ascomycota;c__sordariomycetes;o__hypocreales;f__nectriaceae;g__fusarium;s__gibberella pulicaris;subclass hypocreomycetidae;subphylum__pezizomycotina;subkingdom__dikarya;superkingdom__eukaryota	0.129138	0.119843	0.0901053	0.0817176	0.0920613	0.112338	0.119223	0.061802	0.264639	0.20133	0.0332653	0.123899	0.0557	0.0927259	0.0921181	0.116018	0.0541876	0.0225397	0.108162	0.0716578	0.0674269	0.00898297	0.0453947	0.00421668	0.0930224	0.0625288	0.0878272	0.0868859	0.00143841	0.00529101	0.164806	0.0888812	0.0807829	0	0.00976626	0.00311696	0.0598942	0.0820883	0.0729947	0.00348161	0.00386885	0.00812535	0.0594873	0.128598	0.137655	0.117616	0.0831471	0.10698
OTU_95	___dq166549.1__gi:74058356_ ;k__fungi;p__ascomycota;c__sordariomycetes;o__hypocreales;f__nectriaceae;g__fusarium;s__fusarium sp.;subclass hypocreomycetidae;subphylum__pezizomycotina;subkingdom__dikarya;superkingdom__eukaryota	0.0736208	0.00749022	0.048807	1.11928	2.13429	2.20616	0.0480204	0.0470872	0.0734259	0.675248	0.241728	0.272827	0.0523242	0.0122008	0.015353	0.239983	0.100445	0.57852	0.040359	0.0327133	0.0469057	0.146177	0.0544736	0.0456807	0.0659285	0.013164	0.0158089	0.200215	0.0143841	0.0282187	0.0608213	0.0344056	0.0253889	0.0222671	0.00488313	0.00779241	0.0590623	0.0445622	0.0364974	0.00348161	0.00773769	0.012188	0.0732152	0.0356357	0.0482998	0.0871232	0.0311802	0.048905
OTU_97	___hq542906.1__gi:353741773_ ;k__fungi;p__fungi;c__kickxellomycotina;o__kickxellales;f__kickxellaceae;g__ramicandelaber;s__ramicandelaber longisporus;superkingdom__eukaryota;subphylum__kickxellomycotina	0.351208	0.217216	0.223386	0.0965753	0.0352901	0.0473716	0.235134	0.203064	0.252402	0.0033932	0.0177415	0.0112635	0.136718	0.165931	0.195751	0.00317859	0.0687258	0.0100177	0.285742	0.239898	0.301955	0.00408317	0.00794407	0.0035139	0.450662	0.0674653	0.154576	0.00377765	0.0115073	0.00705467	0.241323	0.249441	0.143101	0.00477152	0	0.00155848	0.183842	0.119614	0.249867	0.00116054	0.00386885	0.00270845	0.0750455	0.032537	0.0217349	0.165534	0.00866116	0.18645
OTU_98	___eu266080.1__gi:162950872_ ;k__fungi;p__ascomycota;c__lecanoromycetes;o__lecanorales;f__cladoniaceae;g__cladonia;s__cladonia furcata;suborder__lecanorineae;subclass lecanoromycetidae;subphylum__pezizomycotina;subkingdom__dikarya;superkingdom__eukaryota	0.146035	0.217216	0.172702	0.0470495	0.0460306	0.0595528	0.250037	0.101532	0.152971	0.0101796	0.0255034	0.00876051	0.113088	0.15129	0.126662	0.00635718	0.0330412	0.0212875	0.135606	0.197838	0.189089	0.00408317	0.0192928	0.00140556	0.229395	0.121767	0.117688	0.00566647	0.0532213	0.0652557	0.272715	0.146224	0.251581	0.0413532	0.050459	0.00623393	0.321931	0.189976	0.171257	0.00116054	0	0.00406267	0.0713848	0.0402838	0.0579598	0.152466	0.0363769	0.137545
OTU_99	___ay176494.1__gi:37729239_ ;k__fungi;p__basidiomycota;c__agaricomycetes;o__agaricales;f__agaricaceae;g__melanophyllum;s__melanophyllum haematospermum;subclass agaricomycetidae;subkingdom__dikarya;superkingdom__eukaryota	0.0965519	0.0730296	0.62886	0.0321918	0.0168779	0.0189486	0.079482	0.0603305	0.0718962	0.0033932	0.00554422	0.010012	0.0911454	0.063444	0.0575738	0.00317859	0.0118948	0.00500883	0.093633	0.200953	0.082085	0.0024499	0.00907894	0.00070278	0.0767661	0.0312644	0.0491832	0.00566647	0.0258915	0.0458554	0.0706312	0.063077	0.0323132	0.0238576	0.0423205	0.0732487	0.0657172	0.0773976	0.0421124	0.00348161	0	0	0.0604025	0.0232407	0.0169049	0.054452	0.0190545	0.0458484
OTU_100	guehomyces pullulans ;k__fungi;p__basidiomycota;c__tremellomycetes;o__cystofilobasidiales;f__cystofilobasidiaceae;g__guehomyces;s__guehomyces pullulans;subkingdom__dikarya;superkingdom__eukaryota	0.193104	0.153549	0.114509	0.0495258	0.0352901	0.0406042	0.0347734	0.13979	0.133085	0.0101796	0.0155238	0.0112635	0.119839	0.102487	0.278274	0.00794647	0.0383278	0.0212875	0.093633	0.144873	0.112867	0.00653307	0.0226974	0	0.150823	0.159613	0.0263481	0.00188882	0.0445908	0.153439	0.0784791	0.174895	0.0669344	0.108155	0.0927795	0.0467545	0.085682	0.098506	0.0617648	0.00348161	0.00193442	0.00270845	0.117144	0.117753	0.202859	0.163356	0.0710215	0.160469
OTU_101	___u15692.1__gi:560023_ ;k__fungi;p__glomeromycota;c__glomeromycetes;o__diversisporales;f__gigasporaceae;g__gigaspora;s__gigaspora margarita;superkingdom__eukaryota	0.00603449	0.00374511	0.00938597	0	0.00767177	0.00406042	0.00331175	0.00294295	0.00764853	0.00452427	0.00554422	0.00750901	0.00506363	0.00488031	0	0.00476788	0.0052866	0.00375662	0.755521	0.00467333	5.19627	0.0048998	0.0034046	0.00210834	0.00451565	0.00493648	0.00351309	0	0.00575366	0.00529101	0.00588593	0	0.00461617	0.00159051	0	0.00155848	0.00665491	0	0.00280749	0.00116054	0.00386885	0.00135422	0	0.00464814	0	0.00217808	0	0.0794706
OTU_102	___eu035420.1__gi:157325616_ ;k__fungi;p__ascomycota;c__eurotiomycetes;o__chaetothyriales;f__herpotrichiellaceae;g__exophiala;s__exophiala sp.;subclass chaetothyriomycetidae;subphylum__pezizomycotina;subkingdom__dikarya;superkingdom__eukaryota	0.129138	0.260285	0.125772	0.0544784	0.0245497	0.0284229	0.102664	0.101532	0.139203	0.00452427	0.0199592	0.0187725	0.0843939	0.148849	0.168883	0.00953577	0.079299	0.0125221	0.0613457	0.135527	0.0923456	0.00653307	0.026102	0	0.148113	0.0526558	0.468997	0.0075553	0.00431524	0.010582	0.36689	0.117553	0.0669344	0	0.00325542	0.00467545	0.0931687	0.192321	0.0758022	0	0.00193442	0.00406267	0.0539962	0.0588764	0.0676198	0.115438	0.0710215	0.177281
OTU_103	___af491587.1__gi:25046019_ ;k__fungi;p__ascomycota;c__pezizomycetes;o__pezizales;f__pezizaceae;g__peziza;s__peziza sp.;subphylum__pezizomycotina;subkingdom__dikarya;superkingdom__eukaryota	0.0024138	0.00936277	0.00563158	0.00247629	0.00153435	0.00676737	0.0066235	6.57455	0.00152971	0.00452427	0.00554422	0.00500601	0.00337576	0.00732047	0.00383826	0.00476788	0.0052866	0.00751324	0.00484308	0.00155778	0.00293161	0.0048998	0.00226974	0.00562224	0.00180626	0.0115185	0.00526963	0.00377765	0.00863049	0.00352734	0.00588593	0.0114685	0.00230808	0.00318102	0.00162771	0	0.00166373	0.00469076	0.00280749	0.00348161	0.00193442	0.00677112	0	0	0	0	0	0
OTU_104	___gu166458.1__gi:312192274_ ;k__fungi;p__ascomycota;c__sordariomycetes;o__sordariales;f__lasiosphaeriaceae;g__podospora;s__podospora sp.;subclass sordariomycetidae;subphylum__pezizomycotina;subkingdom__dikarya;superkingdom__eukaryota	0.00603449	0.00749022	0.00375439	0.00495258	0.00767177	0.00270695	0.00331175	0.0103003	0.00611883	0.0033932	0.00443538	0.0162695	0.0118151	0.00244016	0.00383826	0.00476788	0.0277546	0.00751324	0.00161436	0.00623111	0.00439741	0.0097996	0.00567434	0.0035139	0.00451565	0	0.00526963	0.0169994	0.00719207	0.00352734	0.00588593	0.00860141	0.00923233	0.00636203	0.00162771	0.00311696	0.0091505	0.0140723	0	0.00232107	0.139278	5.43044	0	0	0	0	0	0
OTU_105	___jf439486.1__gi:328923736_ ;k__fungi;p__fungi;c__mortierellomycotina;o__mortierellales;f__mortierellaceae;g__mortierella;s__mortierella humilis;superkingdom__eukaryota;subphylum__mortierellomycotina	0	0	0	0	0	0	0	0	0	0	0	0	0	0	0	0	0	0	0	0	0	0	0	0	0.00180626	0	0	0	0	0	0	0	0	0	0	0	0	0	0	0.00116054	0	0.00270845	0	0	0	0	0.00866116	0
OTU_106	___hq888730.1__gi:321173749_ ;k__fungi;p__blastocladiomycota;c__blastocladiomycetes;o__blastocladiales;f__blastocladiaceae;g__blastocladiella;s__blastocladiella britannica;superkingdom__eukaryota	0	0	0.00187719	0.00742887	0.00613742	0.00135347	0.0066235	0.0058859	0.00611883	0.00113107	0.00887075	0.002503	0	0.00244016	0.00383826	0.00158929	0	0.00250441	0.00322872	0.00311556	0.0014658	0.00571643	0.00113487	0.00140556	0.00361252	0.426183	0.14755	0	0.00143841	0.010582	0.604289	0	0.00692425	0.244938	0.00325542	0.579755	0.00499118	0.497221	0.0308824	0	0.00193442	0.00135422	0.497863	0.233956	0.00482998	0.0108904	0.00866116	0.155885
OTU_107	___dq177877.1__gi:74273803_ ;k__fungi;p__ascomycota;c__saccharomycetes;o__saccharomycetales;f__dipodascaceae;g__galactomyces;s__galactomyces geotrichum;subphylum__saccharomycotina;subkingdom__dikarya;superkingdom__eukaryota	0.0024138	0	0	0.00247629	0	0	0	0.00147148	0.00152971	0.00226214	0	0.0112635	0	0	0.00191913	0.00158929	0.00132165	0.00500883	0	0.00155778	0.00439741	0.0269489	0	0	0	0.00164549	0	0.0132218	0	0.00176367	0	0	0	0	0.00162771	0	0	0.00469076	0	0.184525	0.20118	0.00270845	0.00640633	0.00929627	0.00241499	0.00871232	0.00692893	0.00611312
OTU_108	___aj301966.1__gi:17426919_ ;k__fungi;p__ascomycota;c__sordariomycetes;o__hypocreales;f__nectriaceae;g__volutella;s__volutella ciliata;subclass hypocreomycetidae;subphylum__pezizomycotina;subkingdom__dikarya;superkingdom__eukaryota;	0.124311	0.108608	0.281579	0.0544784	0.021481	0.0433111	0.140749	0.0603305	0.145322	0.0101796	0.0243946	0.020024	0.0641394	0.078085	0.10939	0.0333752	0.0211464	0.0325574	0.0500452	0.0950245	0.0762217	0.0187826	0.017023	0.0035139	0.0668316	0.0773382	0.0667486	0.0472206	0.0848664	0.0917108	0.084365	0.0974827	0.126945	0.120879	0.0276711	0.042079	0.118125	0.192321	0.0814172	0.00464215	0.00193442	0.00406267	0.0796215	0.057327	0.181124	0.0893013	0.0363769	0.0809989
OTU_109	minimedusa polyspora ;k__fungi;p__basidiomycota;c__agaricomycetes;o__cantharellales;f__cantharellales;g__minimedusa;s__minimedusa polyspora;superkingdom__eukaryota;subkingdom__dikarya	0.726553	0.0149804	0.058193	0.00495258	0.0552368	0.074441	0.0380851	0	0.0933121	0.00791748	0	0.0012515	0.00337576	0.219614	0.0345443	0	0.149346	0.00125221	0.00322872	0.00934667	0.021987	0.0024499	0.00226974	0.00070278	0.00361252	0.00329099	0	0.0075553	0.00143841	0.00529101	0	0.00286714	0.00230808	0.00159051	0	0.00155848	0.0274515	0.00469076	0.00842247	0	0.00193442	0	0.0082367	0.00619751	0.01449	0.0108904	0.0277157	0.00305656
OTU_110	___am292049.1__gi:110835639_ ;k__fungi;p__ascomycota;c__ascomycota;o__ascomycota;f__ascomycota;g__trichocladium;s__trichocladium opacum;superkingdom__eukaryota;subkingdom__dikarya	0.0410346	0.0299609	0.00563158	0.0222866	0.0199466	0.00947431	0.0562998	0.0353154	0.123906	0.00452427	0.00554422	0.002503	0.0286939	0.122008	0.0422208	0.00794647	0.0158598	0.00125221	0.0274441	0.0903511	0.0630295	0.0048998	0.0249671	0	0.0550909	0.279734	0.0298612	0.00377765	0.0791128	0.0335097	0.0176578	0.0659441	0.0392374	0.0334007	0.039065	0.045196	0.0582305	0.0469076	0.0168449	0	0.00193442	0	0.0475898	0.0604258	0.0869397	0.028315	0.0918083	0.0320939
OTU_111	___eu352771.1__gi:164421752_ ;k__fungi;p__chytridiomycota;c__chytridiomycetes;o__lobulomycetales;f__lobulomycetaceae;g__lobulomyces;s__lobulomyces poculatus;superkingdom__eukaryota	0.0350001	0.0655394	0.129526	0.0420969	0.0306871	0.0216556	0.0910732	0.180991	0.107079	0.0033932	0.0166327	0.010012	0.013503	0.0658842	0.124743	0.0127144	0.0462577	0.00876545	0.121077	0.0950245	0.0938114	0.00408317	0.00226974	0.00210834	0.142695	0.0148095	0.0158089	0.00188882	0.0431524	0.0388007	0.0274677	0.0430071	0.027697	0.114517	0.164399	0.0748071	0.176355	0.0257992	0.0477273	0.00232107	0.00773769	0	0.0878582	0.176629	0.0772798	0.054452	0.0433058	0.0672444
OTU_112	___hm371217.1__gi:302701990_ ;k__fungi;p__ascomycota;c__sordariomycetes;o__sordariales;f__chaetomiaceae;g__humicola;s__humicola sp.;subclass sordariomycetidae;subphylum__pezizomycotina;subkingdom__dikarya;superkingdom__eukaryota	0.0024138	0.00749022	0.0131404	0.00495258	0.00153435	0.00270695	0	0	0.00611883	0.015835	0.00665306	0.017521	0.0151909	0.00244016	0.00575738	0.0174822	0.00132165	0.00250441	0.00161436	0.00778889	0.0161238	0.0048998	0.00226974	0.00070278	0.0090313	0.00493648	0.00702617	0.126551	0.00719207	0	0	0.02007	0.00461617	0.0127241	0.00325542	0	0.00415932	0.0140723	0.0252674	0.439844	0.00967212	0.00135422	0.00732152	0.0170432	0.012075	0.0174246	0.0207868	0.0259808
OTU_113	___jf735332.1__gi:345447675_ ;k__fungi;p__ascomycota;c__sordariomycetes;o__hypocreales;f__nectriaceae;g__ilyonectria;s__ilyonectria sp.;subclass hypocreomycetidae;subphylum__pezizomycotina;subkingdom__dikarya;superkingdom__eukaryota	0.0313794	0.0524315	0.0469298	0.0123814	0.0122748	0.0378972	0.066235	0.0794597	0.0826042	0.0305388	0.0155238	0.0162695	0.0843939	0.0488031	0.130501	0.0635718	0.0634392	0.0613581	0.0855612	0.0701	0.0688927	0.0146994	0.0851151	0	0.0659285	0.0493648	0.0404005	0.0245547	0.041714	0.0335097	0.0137338	0.063077	0.0600102	0.0604393	0.011394	0.00935089	0.0690447	0.0844337	0.0645723	0.00232107	0.00193442	0	0.0457595	0.0774689	0.0241499	0.0784109	0.0398413	0.0458484
OTU_114	___hm853976.1__gi:307750517_ ;k__fungi;p__ascomycota;c__dothideomycetes;o__pleosporales;f__melanommataceae;g__herpotrichia;s__herpotrichia juniperi;subclass pleosporomycetidae;subphylum__pezizomycotina;subkingdom__dikarya;superkingdom__eukaryota	0.00482759	0.00374511	0	0.00495258	0.00153435	0.00947431	0.0198705	0.0058859	0.00305941	0	0	0.00500601	0.00337576	0.00488031	0.0191913	0	0.0026433	0.00125221	0.00161436	0.00155778	0.00293161	0.00163327	0	0.00070278	0.00722504	0.0806292	0.00351309	0	0	0	0.0117719	0.00286714	0.0853991	0	0	0	0.000831864	0.0140723	0.00561498	0	0	0.00135422	0.00640633	0	0.0241499	0.00217808	0.00173223	0.00305656
OTU_115	___dq485617.1__gi:94995469_ ;k__fungi;p__chytridiomycota;c__chytridiomycetes;o__rhizophydiales;f__rhizophydiales;g__operculomyces;s__rhizophydium sp.;superkingdom__eukaryota	0.0012069	0.0355785	0.0131404	0.00247629	0	0.00406042	0.0066235	0.00882885	0.0795448	0.00791748	0.00443538	0.00375451	0.00168788	0.47583	0.00191913	0.00476788	0	0.0438272	0.0742606	0	0.0014658	0.0106162	0.00113487	0	0.0126438	0.0213914	0.0386439	0	0.00287683	0	0.00980988	0	0	0	0.0227879	0	0.000831864	0.018763	0.00842247	0.00116054	0	0.00135422	1.14765	0.0371851	0.340514	0.00435616	0	0.0565464
OTU_116	___hq630988.1__gi:317383309_ ;k__fungi;p__ascomycota;c__leotiomycetes;o__helotiales;f__helotiales;g__chalara;s__chalara sp.;superkingdom__eukaryota;subkingdom__dikarya;subphylum__pezizomycotina	0.0337932	0.0955003	0.110754	0.017334	0.00153435	0.0148882	0.0347734	0.00441443	0.0535397	0.00565534	0	0.010012	0.0911454	0.0707645	0.0134339	0.00158929	0.0237897	0.00125221	0.00645745	0.436178	0.109935	0.000816633	0.00226974	0.00070278	0.0352221	0.0641743	0.00526963	0.00377765	0.0201378	0	0.0313916	0.0573427	0.0161566	0.0508963	0.0211602	0.0311696	0.0316108	0.197012	0.0140375	0	0	0.00135422	0.286454	0.0480307	0.01449	0.117616	0.0346446	0.0259808
OTU_117	___fj664877.1__gi:238058348_ ;k__fungi;p__ascomycota;c__eurotiomycetes;o__verrucariales;f__verrucariaceae;g__verrucaria;s__verrucaria nigrescens;subclass chaetothyriomycetidae;subphylum__pezizomycotina;subkingdom__dikarya;superkingdom__eukaryota	0.0313794	0.0599217	0.0469298	0.00247629	0.0352901	0.00947431	0.0612674	0.0485587	0.0581289	0.0033932	0.0099796	0.002503	0.0388212	0.0512433	0.0345443	0	0.0145381	0.00751324	0.0306729	0.02804	0.0175896	0.0024499	0.00907894	0.00070278	0.0153532	0.0526558	0.0140523	0.00377765	0.0100689	0.00352734	0.0431635	0.0143357	0.0369293	0.0143146	0.00813855	0	0.0133098	0.0257992	0.0449198	0.00232107	0.00193442	0	0.0329468	0.0154938	0.0217349	0.0457397	0.0207868	0.0336222
OTU_118	mastigobasidium intermedium ;k__fungi;p__basidiomycota;c__microbotryomycetes;o__leucosporidiales;f__leucosporidiaceae;g__mastigobasidium;s__mastigobasidium intermedium;subphylum__pucciniomycotina;subkingdom__dikarya;superkingdom__eukaryota	0.0567242	0.0149804	0.0657018	0.00742887	0.00767177	0.0108278	0.00993526	0.0206007	0.05201	0.00452427	0.00554422	0.00375451	0.0253182	0.031722	0.0287869	0.00158929	0.0171814	0.00125221	0.0419734	0.0732156	0.0879482	0.00326653	0.00907894	0	0.0478659	0.0115185	0.0667486	0.00377765	0.0100689	0.047619	0.0765171	0.0401399	0.0253889	0.0381722	0.0602253	0.0327281	0.0282834	0.0234538	0.01123	0.00116054	0	0.00135422	0.0951797	0.0356357	0.10143	0.0196027	0.0103934	0.0504333
OTU_119	mortierella sp. 02nh02 ;k__fungi;p__mucoromycota;c__mortierellomycetes;o__mortierellales;f__mortierellaceae;g__mortierella;s__mortierella sp.;superkingdom__eukaryota;subphylum__mortierellomycotina	0.0531035	0.0187255	0.0131404	0.00742887	0.0122748	0.0500785	0.0943849	0.0147148	0.0152971	0.0203592	0.0221769	0.0438026	0.0118151	0.00488031	0.224538	0.0492681	0.00396495	0.0237919	0.0129149	0.00778889	0.0688927	0.00163327	0.051069	0.00070278	0.150823	0.197459	0.0158089	0.0264435	0.0661671	0.015873	0.180502	0.209301	0.0853991	0.2513	0.00162771	0.0436375	0.547366	0.0211084	0.0336899	0.00464215	0.00193442	0.00135422	0.0979253	0.00464814	0	0.0196027	0.067557	0.0076414
OTU_120	___jf908791.1__gi:344333744_ ;k__fungi;p__basidiomycota;c__agaricomycetes;o__boletales;f__boletaceae;g__tubosaeta;s__tubosaeta brunneosetosa;suborder__boletineae;subclass agaricomycetidae;subkingdom__dikarya;superkingdom__eukaryota	0.0024138	0.00187255	0.00375439	0.00495258	0.159573	0.224677	0.0066235	0.572404	0.403843	0.0033932	0.00332653	0.0012515	0.00168788	0.00488031	0.0786842	0.00317859	0.134808	0.00626104	0.00645745	0	0.0351793	0.00571643	0.0034046	0.00140556	0.00451565	0.00164549	0.00351309	0.00377765	0.00143841	0	0.20797	0.00286714	0.0415455	0.00795254	0.00488313	0.00155848	1.69783	0.00938152	0.0982622	0	0.00386885	0	0	0	0	0	0	0
OTU_121	___am901688.1__gi:163257623_ ;k__fungi;p__ascomycota;c__dothideomycetes;o__capnodiales;f__cladosporiaceae;g__cladosporium;s__cladosporium sp.;subclass dothideomycetidae;subphylum__pezizomycotina;subkingdom__dikarya;superkingdom__eukaryota	0.0036207	0.00749022	0.00938597	1.4833	1.44076	1.55243	0.00496763	0.00882885	0.00764853	0.0180971	0.406946	0.0838506	0.00337576	0.00244016	0	0.0492681	0.0079299	0.0100177	0.00161436	0.00467333	0.00439741	0.00816633	0.00794407	0.0147584	0.00270939	0.00822747	0.00526963	0.0075553	0	0.00176367	0.00392395	0.00573427	0	0.00318102	0.00162771	0.0280527	0.00415932	0.00703614	0.00561498	0.00232107	0.00386885	0.00135422	0.00183038	0	0.00241499	0.0130685	0.00346446	0.00305656
OTU_122	___ef635907.1__gi:157153592_ ;k__fungi;p__basidiomycota;c__ustilaginomycetes;o__urocystidales;f__urocystidaceae;g__melanoxa;s__melanoxa oxalidis;subphylum__ustilaginomycotina;subkingdom__dikarya;superkingdom__eukaryota	0.059138	0.0374511	0.0131404	0.151054	0.101267	0.180012	0.0463645	0.10006	0.0474209	0.015835	0.0377007	0.0112635	0.126591	0.0341622	0.0498973	0.00953577	0.0634392	0.0225397	0.0387447	0.0311556	0	0.00816633	0.0204276	0.112445	0.0325127	0.0362009	0.019322	0.0207771	0.185555	0.234568	0.0510114	0.117553	0.0253889	0.128831	0.209975	0.0607808	0.0191329	0.0398715	0.0224599	0.00116054	0.00386885	0.00812535	0.140939	0.0883146	0.0362249	0.0174246	0.0467703	0.0366787
OTU_123	___af391039.1__gi:18092113_ ;k__fungi;p__basidiomycota;c__agaricomycetes;o__agaricales;f__agaricaceae;g__melanophyllum;s__melanophyllum haematospermum;subclass agaricomycetidae;subkingdom__dikarya;superkingdom__eukaryota	0.0917243	0.196618	0.112632	0.0148577	0.0352901	0.0378972	0.115911	0.0559161	0.10249	0.00226214	0.00665306	0.0112635	0.0843939	0.148849	0.0479782	0.00317859	0.0118948	0.00500883	0.0952473	0.115276	0.0923456	0.00408317	0.00567434	0.00140556	0.0731536	0.0872112	0.0597225	0	0.0258915	0.0388007	0.0765171	0.0774127	0.0207727	0.0572583	0.0895241	0.0389621	0.0798589	0.171213	0.0673798	0.00232107	0.00773769	0	0.0777911	0.102259	0.0917697	0.0457397	0.0363769	0.0290373
OTU_124	___dq177877.1__gi:74273803_ ;k__fungi;p__ascomycota;c__saccharomycetes;o__saccharomycetales;f__dipodascaceae;g__galactomyces;s__galactomyces geotrichum;subphylum__saccharomycotina;subkingdom__dikarya;superkingdom__eukaryota	0	0.00187255	0	0	0.00460306	0.00135347	0	0	0	0.0033932	0.00443538	0.002503	0.00337576	0.00488031	0.00383826	0.00317859	0.00132165	0	0	0.00155778	0.00293161	0.00816633	0.00567434	0.00070278	0.00180626	0.00658198	0.00175654	0.0075553	0.00143841	0.00176367	0	0.00286714	0	0.00477152	0.00162771	0.00779241	0.00332745	0.00938152	0.00842247	0.10793	0.903376	0.00270845	0.00549114	0.00309876	0.00241499	0.00871232	0.0103934	0.0076414
OTU_125	___gu566291.1__gi:291498479_ ;k__fungi;p__ascomycota;c__sordariomycetes;o__sordariales;f__cephalothecaceae;g__phialemonium;s__taifanglania inflata;subclass sordariomycetidae;subphylum__pezizomycotina;subkingdom__dikarya;superkingdom__eukaryota	0.0675863	0.0973728	0.159561	0.0321918	0.052168	0.0284229	0.110944	0.0632734	0.10249	0.00226214	0.0277211	0.00625751	0.0877696	0.139089	0.0403017	0	0.0198247	0.00626104	0.0952473	0.0623111	0.0747559	0.0048998	0.0124835	0.00140556	0.0334158	0.0625288	0.0544528	0.0075553	0.135211	0.10582	0.0667072	0.0659441	0.122328	0.0731634	0.0878963	0.120003	0.0224603	0.105542	0.145989	0	0.00773769	0	0.0796215	0.156487	0.13041	0.0914794	0.0554314	0.0198677
OTU_126	___aj890435.1__gi:62718900_ ;k__fungi;p__ascomycota;c__ascomycota;o__ascomycota;f__ascomycota;g__tetracladium;s__tetracladium sp.;superkingdom__eukaryota;subkingdom__dikarya	0.152069	0.08801	0.135158	0.0445732	0.0414276	0.0378972	0.130814	0.122132	0.119317	0.00452427	0.0110884	0.0212755	0.0590757	0.0927259	0.117067	0.00317859	0.0581526	0.0150265	0.135606	0.0778889	0.140717	0.00653307	0.00794407	0.00210834	0.130954	0.0477193	0.0755314	0	0.0100689	0.015873	0.131452	0.12042	0.0877072	0.00636203	0.00162771	0.00779241	0.0956643	0.103197	0.12353	0.00232107	0	0.00135422	0.038438	0.0185925	0.01449	0.0936574	0.022519	0.0458484
OTU_127	___hm116744.1__gi:298683516_ ;k__fungi;p__ascomycota;c__dothideomycetes;o__pleosporales;f__lophiostomataceae;g__lophiostoma;s__lophiostoma sp.;subclass pleosporomycetidae;subphylum__pezizomycotina;subkingdom__dikarya;superkingdom__eukaryota	0.0579311	0.0318334	0.0168947	0.00742887	0.0107405	0.0175951	0.0198705	0.00735738	0.00611883	0.00791748	0.00554422	0.00500601	0.0438848	0.0658842	0.0383826	0	0.0145381	0.0137743	0.0952473	0.0545222	0.0879482	0.00898297	0.017023	0.00281112	0.00270939	0.0510103	0.0316178	0.0169994	0.017261	0.0458554	0.084365	0.0544756	0.0461617	0.0111336	0.0276711	0.045196	0.0848501	0.0609799	3.98944	0.00232107	0.00773769	0.00135422	0.0228797	0.0635245	0.012075	0.0392054	0.0381091	0.0275091
OTU_128	fungal sp. ksl3 ;k__fungi;p__cryptomycota;c__cryptomycota;o__cryptomycota;f__cryptomycota;g__paramicrosporidium;s__fungal sp.;superkingdom__eukaryota	0.310173	0.157295	0.0450527	0.0297155	0.0199466	0.025716	0.157308	0.138319	0.107079	0.0124417	0.0099796	0.00750901	0.0759545	0.00244016	0.0767651	0.00158929	0.00132165	0.00500883	0.0161436	0.11216	0.00879482	0.00571643	0.0102138	0.00140556	0.102054	0.0625288	0.161602	0.00377765	0.024453	0.0493827	0.0215817	0.0745456	0.0623182	0.0334007	0.0748747	0.0280527	0.118125	0.0257992	0.0252674	0.00348161	0.00386885	0.00135422	0.0960949	0.0604258	0.11109	0.128507	0.0190545	0.010698
OTU_129	___fm876834.1__gi:229359280_ ;k__fungi;p__glomeromycota;c__glomeromycetes;o__diversisporales;f__gigasporaceae;g__cetraspora;s__scutellospora nodosa;superkingdom__eukaryota	0.144828	0.0805198	0.0638246	0.0297155	0.0460306	0.0351903	0.0248381	0.173634	0.174387	0.00113107	0.00776191	0.00625751	0.0320697	0.0414826	0.0479782	0.00317859	0.0145381	0.0338096	0.0613457	0.0545222	0.0791534	0.0024499	0.0272368	0.00210834	0.134566	0.00822747	0.080801	0.00188882	0.0460293	0.0881834	0.0235437	0.0860141	0.203111	0.0747539	0.0602253	0.0218187	0.317772	0	0.0336899	0.00348161	0.00386885	0.00270845	0.388955	0.0294382	0.0893547	0.111082	0.00866116	0.0626595
OTU_130	___hq888730.1__gi:321173749_ ;k__fungi;p__blastocladiomycota;c__blastocladiomycetes;o__blastocladiales;f__blastocladiaceae;g__blastocladiella;s__blastocladiella britannica;superkingdom__eukaryota	0.0506897	0.0243432	0.0150176	0.15353	0.60607	0.051432	0.039741	0.153033	0.0795448	0.00678641	0.00443538	0.010012	0.0151909	0.261097	0.174641	0.0127144	0.00132165	0.00500883	0.104933	0.177587	0.0527689	0.0122495	0.00113487	0.00281112	0.298033	0.0263279	0.00526963	0.0075553	0.729276	0.00352734	0.0156958	0	0.0230808	0.0540773	0.112312	0.447284	0.625562	0.0281446	0.193717	0.00464215	0	0.00135422	0.0814519	0.0542283	0	0.00217808	0.0173223	0.10698
OTU_131	___af081472.2__gi:11602961_ ;k__fungi;p__ascomycota;c__sordariomycetes;o__hypocreales;f__hypocreales;g__stachybotrys;s__stachybotrys dichroa;superkingdom__eukaryota;subkingdom__dikarya;subphylum__pezizomycotina;subclass hypocreomycetidae	0.024138	0.0205981	0.0356667	0.0123814	0.00767177	0.0135347	0.0463645	0.0868171	0.133085	0.00226214	0.00554422	0.00750901	0.0151909	0.0195212	0.0710077	0.00476788	0.0052866	0.00500883	0.0226011	0.152662	0.0498373	0.00571643	0.0124835	0.00281112	0.0523816	0.0756928	0.0333743	0.0113329	0.0115073	0.883598	0.125567	0.275245	0.133869	0.0715729	0.0797578	0.042079	0.0507437	0.0633253	0.0954547	0.00348161	0.00386885	0.00270845	0.038438	0.0294382	0.00724498	0.0740547	0.0155901	0.0152828
OTU_132	lipomyces lipofer ;k__fungi;p__ascomycota;c__saccharomycetes;o__saccharomycetales;f__lipomycetaceae;g__lipomyces;s__lipomyces lipofer;subphylum__saccharomycotina;subkingdom__dikarya;superkingdom__eukaryota	0.0820691	0.08801	0.0506842	0.0148577	0.00460306	0.00812084	0.0513322	0.0338439	0.0550694	0.0033932	0.00332653	0	0.0354454	0.0488031	0.074846	0.00158929	0.0118948	0.00751324	0.0452021	0.0701	0.0571663	0.000816633	0.0113487	0	0.139082	0.0608833	0.0281047	0.00944412	0.0345219	0.0970018	0.0588593	0.0774127	0.0415455	0.0572583	0.0667361	0.0264942	0.12062	0.0562891	0.115107	0.00116054	0.00193442	0.00270845	0.0466747	0.102259	0.0410549	0.0500958	0.0277157	0.0259808
OTU_133	___ay805624.1__gi:55783691_ ;k__fungi;p__basidiomycota;c__agaricomycetes;o__corticiales;f__corticiaceae;g__sistotrema;s__sistotrema sernanderi;subkingdom__dikarya;superkingdom__eukaryota	0.0024138	0.00187255	0	0	0	0.00270695	0.0165588	0	0	0.00113107	0.00221769	0.00876051	0.00168788	0	0.00383826	0.00317859	0.0026433	0.0513405	0.00161436	0.314671	0.435343	0.00163327	0	0	0.00451565	0	0.0245916	0.164328	0.00143841	0.00176367	0.141262	0.063077	0	0.0111336	0	0	0.000831864	0	0.00842247	0.00232107	0	0	0.00274557	0.00619751	0	0.720944	0	0.0809989
OTU_134	___fm955448.1__gi:282944064_ ;k__fungi;p__ascomycota;c__sordariomycetes;o__sordariales;f__lasiosphaeriaceae;g__cladorrhinum;s__cladorrhinum bulbillosum;subclass sordariomycetidae;subphylum__pezizomycotina;subkingdom__dikarya;superkingdom__eukaryota	0	0.00374511	0.00750878	0.00742887	0.00306871	0	0.00496763	0.0117718	0.00305941	0.00226214	0.00221769	0.00375451	0.00506363	0	0.00191913	0.00953577	0.0052866	0.00500883	0	0.00467333	0.00586321	0.0024499	0.00453947	0.0035139	0.00090313	0.00164549	0.00351309	4.78439	0.00143841	0.00881834	0.00392395	0.00286714	0.00461617	0.00636203	0.00325542	0.00155848	0.00415932	0	0	0.00232107	0.0193442	0.0108338	0	0	0	0	0.00173223	0
OTU_135	___gu725443.1__gi:291419706_ ;k__fungi;p__ascomycota;c__sordariomycetes;o__glomerellales;f__glomerellaceae;g__colletotrichum;s__colletotrichum sp.;subclass hypocreomycetidae;subphylum__pezizomycotina;subkingdom__dikarya;superkingdom__eukaryota	0.0881036	0.219089	0.161439	0.0222866	0.0199466	0.0392507	0.0861055	0.148619	0.0734259	0.00226214	0.0155238	0.010012	0.25487	0.15129	0.0537356	0	0.0145381	0.00500883	0.0774893	0.147989	0.121662	0.0024499	0.00907894	0.00070278	0.0370283	0.0575923	0.0281047	0.00944412	0.0115073	0.00352734	0.00588593	0.263777	0.0253889	0.00636203	0.00813855	0.00155848	0.0116461	0.018763	0.0168449	0.00232107	0	0	0.0713848	0.0588764	0.0338099	0.115438	0.090076	0.203261
OTU_136	cryptococcus victoriae ;k__fungi;p__basidiomycota;c__tremellomycetes;o__tremellales;f__tremellales;g__cryptococcus;s__cryptococcus victoriae;superkingdom__eukaryota;subkingdom__dikarya	0.0036207	0.00187255	0.00750878	1.25796	1.15383	0.854041	0.00165588	0.00147148	0.00611883	0.0599466	0.256143	0.10012	0.0101273	0	0	0.0445002	0.0198247	0.0914111	0.00161436	0.00311556	0.00293161	0.0048998	0.00907894	0.0871447	0.00632191	0.00164549	0.00526963	0.00566647	0.00575366	0.0388007	0.00196198	0.00573427	0.00230808	0.00636203	0.00651084	0.00155848	0.00499118	0	0.00280749	0.00232107	0.00386885	0.00406267	0	0	0	0	0	0.00152828
OTU_137	gibellulopsis nigrescens ;k__fungi;p__ascomycota;c__sordariomycetes;o__glomerellales;f__plectosphaerellaceae;g__gibellulopsis;s__gibellulopsis nigrescens;subclass hypocreomycetidae;subphylum__pezizomycotina;subkingdom__dikarya;superkingdom__eukaryota	0.0313794	0.0561766	0.0225263	0.0420969	0.052168	0.0406042	0.0281499	0.0882885	0.0413021	0.00904855	0.00776191	0.022527	0.0405091	0.0195212	0.00959564	0.0127144	0.0211464	0.0162787	0.0565026	0.0264822	0.0263845	0.00326653	0.0113487	0.00913614	0.0198689	0.0312644	0.0386439	0	0.0201378	0.0617284	0.0353156	0.0602099	0.0207727	0.0731634	0.0472036	0.0342866	0.0374339	0.0164177	0.01123	0	0	0	0.0420987	0.0278888	0.0193199	0.0784109	0.045038	0.0336222
OTU_138	___aj301990.1__gi:11877246_ ;k__fungi;p__ascomycota;c__sordariomycetes;o__hypocreales;f__hypocreaceae;g__trichoderma;s__hypocrea koningii;subclass hypocreomycetidae;subphylum__pezizomycotina;subkingdom__dikarya;superkingdom__eukaryota	0.0277587	0.0149804	0.00375439	0.00247629	0.00460306	0.00812084	0.0281499	0.00882885	0.0168268	0.00452427	0.00332653	0.002503	0.00843939	0.00976062	0.0230295	0.00476788	0.00660825	0	0.00645745	0.0186933	0.0117264	0.00163327	0.00226974	0.00070278	0.0334158	0.00987297	0.19322	0.0207771	0.0632902	0.00705467	0.0137338	0.02007	0.0161566	0.0238576	0.0195325	0.0218187	0.0232922	0.0539438	0.0701873	0.00116054	0	0	0.00640633	0.012395	0.01449	0.028315	0.00519669	0.00611312
OTU_139	___hq607852.1__gi:312434331_ ;k__fungi;p__ascomycota;c__eurotiomycetes;o__chaetothyriales;f__herpotrichiellaceae;g__exophiala;s__exophiala sp.;subclass chaetothyriomycetidae;subphylum__pezizomycotina;subkingdom__dikarya;superkingdom__eukaryota	0.0651725	0.101118	0.0281579	0.0371443	0.0138092	0.0175951	0.0761703	0.0250151	0.0642477	0.00452427	0.0155238	0.0137665	0.0523242	0.0951661	0.059493	0.00158929	0.0185031	0.00626104	0.0791037	0.0514067	0.0952772	0.00163327	0.00794407	0.00070278	0.0559941	0.0378464	0.240646	0.00566647	0.00575366	0.00705467	0.0902509	0.0802798	0.0438536	0	0.0162771	0	0.118957	0.0281446	0.148797	0.00116054	0	0	0.0302013	0.0216913	0.0458849	0.126329	0.022519	0.0657161
OTU_140	___jf907991.1__gi:344332950_ ;k__fungi;p__basidiomycota;c__agaricomycetes;o__agaricales;f__tricholomataceae;g__collybia;s__collybia hariolorum;subclass agaricomycetidae;subkingdom__dikarya;superkingdom__eukaryota	0.0808622	0.0823924	0.0807193	0.0321918	0.00767177	0.0135347	0.0993526	0.0382584	0.0673071	0.00452427	0.00776191	0.00500601	0.0658272	0.0219614	0.059493	0.00635718	0.0290763	0.00500883	0.0710319	0.0669845	0.0718243	0.0024499	0.0124835	0.00070278	0.0785723	0.0526558	0.0298612	0.00188882	0.0287683	0.0335097	0.0215817	0.0143357	0.0877072	0.0652108	0.0895241	0.0483129	0.0615579	0.0445622	0.0617648	0.00232107	0.00386885	0	0.0265405	0.0294382	0.0338099	0.0588082	0.022519	0.0290373
OTU_141	___jf340278.1__gi:327180260_ ;k__fungi;p__ascomycota;c__sordariomycetes;o__sordariales;f__lasiosphaeriaceae;g__fimetariella;s__fimetariella rabenhorstii;subclass sordariomycetidae;subphylum__pezizomycotina;subkingdom__dikarya;superkingdom__eukaryota	0.0748277	0.108608	0.0863509	0.0297155	0.0199466	0.0175951	0.0943849	0.0323725	0.0657774	0.0101796	0.014415	0.010012	0.0928333	0.136649	0.10939	0.0174822	0.0251113	0.0187831	0.0952473	0.0716578	0.0483715	0.0073497	0.0612829	0.0035139	0.0451565	0.0806292	0.0597225	0.0151106	0.0560982	0.0864198	0.082403	0.0516085	0.0738587	0.108155	0.154632	0.0981844	0.0515755	0.0727068	0.0505348	0.0104448	2.242	0.00135422	0.0631481	0.0712714	0.0458849	0.054452	0.0207868	0.0351505
OTU_142	___fj792583.1__gi:225675529_ ;k__fungi;p__ascomycota;c__pezizomycetes;o__pezizales;f__ascodesmidaceae;g__cephaliophora;s__cephaliophora tropica;subphylum__pezizomycotina;subkingdom__dikarya;superkingdom__eukaryota	0	0	0	0	0	0	0	0	0	0	0	0	0	0	0	0	0	0	0	0	0	0	0	0	0	0	0	0	0	0.00352734	0	0	0	0	0	0	0	0	0	0	0.00773769	0	0.00274557	0.00464814	0	0.00653424	0.00346446	0.00458484
OTU_143	___aj302002.1__gi:11877344_ ;k__fungi;p__ascomycota;c__sordariomycetes;o__hypocreales;f__hypocreales;g__myrothecium;s__myrothecium atroviride;superkingdom__eukaryota;subkingdom__dikarya;subphylum__pezizomycotina;subclass hypocreomycetidae	0.101379	0.0355785	0.0225263	0.0297155	0.0184123	0.0473716	0.0612674	0.0500302	0.0413021	0.00452427	0.0121973	0.010012	0.0236303	0.15373	0.105552	0.00317859	0.0132165	0.00626104	0.0290585	0.0623111	0.0263845	0	0.00453947	0.00281112	0.069541	0.0608833	0.0281047	0.134106	0.00431524	0.00881834	0.0137338	0.0802798	0.0161566	0.0127241	0	0	0.0266196	0.03049	0.0786097	0.00116054	0	0.00135422	0.048505	0.0356357	0.0531298	0.0392054	0.0363769	0.0550181
OTU_144	circinella muscae ;k__fungi;p__fungi;c__mucoromycotina;o__mucorales;f__lichtheimiaceae;g__circinella;s__circinella muscae;superkingdom__eukaryota;subphylum__mucoromycotina	0.0024138	0.00374511	0.00563158	0.0321918	0.0276184	0.0500785	0.00331175	0.00294295	0.0122377	0.216034	1.64996	0.205246	0.00168788	0.00244016	0.00959564	0.00794647	0.00925155	0.0100177	0.00161436	0	0.0014658	0.0114329	0.00453947	0.00140556	0.00270939	0.00493648	0.00175654	0.00377765	0.158226	0	0.00392395	0	0.00230808	0.00954305	0.0472036	0.0140263	0.00332745	0	0.00280749	0.00116054	0.0444917	0.00677112	0	0	0	0	0	0
OTU_145	___hq441577.1__gi:332015805_ ;k__fungi;p__basidiomycota;c__agaricomycetes;o__auriculariales;f__auriculariales;g__oliveonia;s__oliveonia pauxilla;superkingdom__eukaryota;subkingdom__dikarya	0.0012069	0.00561766	0	0.00247629	0	0.213849	0	0.0206007	0.00458912	0	0.00443538	0.0012515	2.02714	0	0.030706	0.00635718	0.00132165	0.398202	0	0.0529645	0.00293161	0.0024499	0	0.00070278	0.00090313	0.0427829	0.00526963	0	0.00287683	0.00176367	0.0353156	0	0.00461617	0	0.0146494	0	0.0457525	0.00469076	0.00280749	0.00116054	0	0.00270845	0.0292861	0	0.00241499	0	0.0363769	0
OTU_146	___eu035406.1__gi:157325602_ ;k__fungi;p__ascomycota;c__eurotiomycetes;o__chaetothyriales;f__herpotrichiellaceae;g__cladophialophora;s__cladophialophora chaetospira;subclass chaetothyriomycetidae;subphylum__pezizomycotina;subkingdom__dikarya;superkingdom__eukaryota	0.0567242	0.125461	0.0356667	0.0148577	0.0276184	0.0189486	0.0496763	0.0367869	0.0535397	0.00791748	0.00665306	0.00500601	0.14347	0.0536834	0.0690886	0.00635718	0.0105732	0.0112699	0.058117	0.01402	0.0351793	0.00571643	0.0158881	0.00210834	0.0885068	0.0740473	0.161602	0	0.00863049	0.00881834	0.370814	0.0172028	0.115404	0.00636203	0.0227879	0.045196	0.0906731	0.0398715	0.0140375	0	0	0	0.0256253	0.0232407	0.0241499	0.0675205	0.00519669	0.048905
OTU_147	___eu035406.1__gi:157325602_ ;k__fungi;p__ascomycota;c__eurotiomycetes;o__chaetothyriales;f__herpotrichiellaceae;g__cladophialophora;s__cladophialophora chaetospira;subclass chaetothyriomycetidae;subphylum__pezizomycotina;subkingdom__dikarya;superkingdom__eukaryota	0.047069	0.0262158	0.0713334	0.0148577	0.0138092	0.0175951	0.0480204	0.0382584	0.05201	0.0113107	0.00887075	0.00375451	0.0506363	0.0292819	0.00575738	0	0.00396495	0.00125221	0.0306729	0.0202511	0.0366451	0.0048998	0.0034046	0	0.0316096	0.0115185	0.0105393	0.00188882	0	0.00176367	0.0392395	0.00286714	0.0115404	0.0159051	0.0292988	0	0.103151	0.0422169	0.0168449	0	0	0	0.0210494	0.00929627	0.0241499	0.0392054	0.0242512	0.0657161
OTU_148	___aj006677.1__gi:3688532_ ;k__fungi;p__basidiomycota;c__agaricomycetes;o__polyporales;f__polyporaceae;g__skeletocutis;s__skeletocutis amorpha;subkingdom__dikarya;superkingdom__eukaryota	0.0289656	0.0112353	0.0131404	0.00247629	0.00767177	0.00270695	0.013247	0.0161862	0.0152971	0	0.00110884	0.002503	0.0168788	0.0170811	0.00191913	0.00317859	0.00925155	0.0200353	0.0209867	0.02804	0.0351793	0.0024499	0.00113487	0	0.0397377	0.0164549	0.0158089	0.0113329	0.00575366	0.021164	0.0176578	0.0516085	0.0230808	0.0111336	0.00488313	0.0109094	0.0432569	0.0234538	0.0224599	0	0.0541638	0	0.0494202	0.0340863	0.00724498	0.0239589	0.0242512	0.0259808
OTU_149	___jn159575.1__gi:347984008_ ;k__fungi;p__basidiomycota;c__agaricomycetes;o__agaricales;f__psathyrellaceae;g__coprinellus;s__coprinellus flocculosus;subclass agaricomycetidae;subkingdom__dikarya;superkingdom__eukaryota	0	0.00374511	0	0.00247629	0.00153435	0	0	0.00294295	0	0	0.00110884	0.0012515	0	0.00732047	0	0	0.257722	0	0	0	0	0	0.00907894	0	0	0	0	0	0	0	0	0	0	0	0.00162771	0	0	0	0	0	0	0	0.000915189	0	0.00241499	0	0	0
OTU_150	___ef432822.2__gi:257412776_ ;k__fungi;p__chytridiomycota;c__chytridiomycetes;o__lobulomycetales;f__lobulomycetaceae;g__maunachytrium;s__maunachytrium keaense;superkingdom__eukaryota	0.0531035	0	0.00375439	0.00247629	0.0138092	0.00135347	0.00331175	0.0176577	0.0596586	0.0033932	0	0	0.124903	0.0902857	0.00191913	0	0	0	0.192109	0.222762	0.0557005	0.0024499	0	0	0.319708	0.106957	0.019322	0.00377765	0.00143841	0	0.0215817	0.0114685	0.0415455	0.00477152	0.00162771	0.00623393	0.0540711	0.110233	0.0982622	0	0	0	0.000915189	0	0	0	0.00692893	0
OTU_151	___ab190382.1__gi:307548376_ ;k__fungi;p__ascomycota;c__eurotiomycetes;o__chaetothyriales;f__herpotrichiellaceae;g__phialophora;s__phialophora alba;subclass chaetothyriomycetidae;subphylum__pezizomycotina;subkingdom__dikarya;superkingdom__eukaryota	0.0265518	0.0280883	0.0150176	0.00742887	0.00613742	0.0121813	0.119223	0.0206007	0.0673071	0.00226214	0.00221769	0.00625751	0.0185667	0.0292819	0.0115148	0.00476788	0.00396495	0.00375662	0.0468165	0.0467333	0.0322477	0.00163327	0.0034046	0.00210834	0.0162563	0.0543013	0.0122958	0.00566647	0.017261	0.026455	0.0156958	0.0315385	0.0300051	0.0429437	0.0553421	0.0405205	0.0274515	0.03049	0.0589573	0.00232107	0.0909179	0.00135422	0.0164734	0.0309876	0.0217349	0.0413835	0.0121256	0.0244525
OTU_152	mortierella sp. 09ct01 ;k__fungi;p__fungi;c__mortierellomycotina;o__mortierellales;f__mortierellaceae;g__mortierella;s__mortierella sp.;superkingdom__eukaryota;subphylum__mortierellomycotina	0.00965519	0.00374511	0	0.00247629	0.00153435	0.00135347	0	0.00294295	0.00152971	0	0.00221769	0	0.00168788	0	1.24935	0.00158929	0	0.00375662	0.00807181	0.00934667	0.00586321	0	0	0.00070278	0.0117407	0.00822747	0.00175654	0	0.00575366	0.0564374	0.584669	0	0.00230808	0.0159051	0.00488313	0.00311696	0.00249559	0.00469076	0.00280749	0.00232107	0	0.00135422	0	0.0108457	0.00965997	0.00871232	0.0190545	0.0168111
OTU_154	___gq386985.1__gi:256427011_ ;k__fungi;p__ascomycota;c__leotiomycetes;o__helotiales;f__sclerotiniaceae;g__sclerotinia;s__sclerotinia homoeocarpa;subphylum__pezizomycotina;subkingdom__dikarya;superkingdom__eukaryota	0.188276	0.00374511	0.0206491	0.0123814	0	0.00270695	0.00165588	0.00147148	0.0183565	0.0203592	0	0.00500601	0	0.236695	0.00191913	0	0.00660825	0	0	0	0.0014658	0.00408317	0	0	0	0	0.00351309	0.00188882	0.00143841	0	0.00392395	0	0.027697	0	0.00162771	0	0.0091505	0.0914699	0.0140375	0	0.00193442	0	0.0082367	0.012395	0	0	0.00519669	0.0244525
OTU_155	leptodiscella sp. fmr 10885 ;k__fungi;p__ascomycota;c__pezizomycotina;o__pezizomycotina;f__pezizomycotina;g__leptodiscella;s__leptodiscella sp.;superkingdom__eukaryota;subkingdom__dikarya;subphylum__pezizomycotina	0.0627587	0.0486864	0.0300351	0.0148577	0.00767177	0.0121813	0.039741	0.105946	0.0275347	0.00113107	0.00887075	0	0.108024	0.0170811	0.0441399	0.00158929	0.0052866	0	0.0258298	0.04206	0.0307819	0.0048998	0.0113487	0.00070278	0.083088	0.0296189	0.00526963	0.00944412	0.0302067	0.00529101	0.0490494	0.0143357	0	0.0349912	0.0292988	0.00935089	0.024124	0.0281446	0.0364974	0	0	0	0.0558266	0.0185925	0.0265649	0.0609862	0.0311802	0.0397353
OTU_156	___aj301913.1__gi:17426617_ ;k__fungi;p__ascomycota;c__sordariomycetes;o__glomerellales;f__glomerellaceae;g__colletotrichum;s__glomerella acutata;subclass hypocreomycetidae;subphylum__pezizomycotina;subkingdom__dikarya;superkingdom__eukaryota	0.00724139	0.0112353	0.0131404	0.00990516	0.00306871	0.00135347	0.00993526	0.0103003	0.00917824	0.00226214	0.0188504	0.0012515	0.0219424	0	0.00191913	0	0.0079299	0.00250441	0.00645745	0.00467333	0.0410425	0.0024499	0.060148	0.00140556	1.21561	0.00329099	0.00351309	0.00188882	0.00287683	0.134039	0.00392395	0.0143357	0.0577021	0	0.00325542	0.00155848	0.00166373	0.00938152	0.00842247	0.00116054	0	0	0.00183038	0.0201419	0	0.00653424	0	0.00152828
OTU_157	___dq104720.1__gi:70888516_ ;k__fungi;p__ascomycota;c__saccharomycetes;o__saccharomycetales;f__pichiaceae;g__kregervanrija;s__kregervanrija fluxuum;subphylum__saccharomycotina;subkingdom__dikarya;superkingdom__eukaryota	0.0374139	0.0318334	0.0300351	0.0198103	0.0168779	0.0121813	0.052988	0.0441443	0.0428318	0.00452427	0.0133061	0.00625751	0.104648	0.063444	0.0230295	0.00635718	0.0079299	0.00375662	0.0306729	0.0669845	0.00586321	0.00408317	0.0374506	0.00140556	0.0650254	0.0362009	0.019322	0.00566647	0.0359604	0.0617284	0.0137338	0.0229371	0.0415455	0.0238576	0.0195325	0.0342866	0.0274515	0.0281446	0.0308824	0.00348161	1.5456	0.00270845	0.00274557	0.032537	0.00724498	0.0239589	0	0.0152828
OTU_160	___z48813.1__gi:1770344_ ;k__fungi;p__ascomycota;c__sordariomycetes;o__hypocreales;f__hypocreaceae;g__hypocrea;s__hypocrea pilulifera;subclass hypocreomycetidae;subphylum__pezizomycotina;subkingdom__dikarya;superkingdom__eukaryota	0.0217242	0.033706	0.0375439	0.00247629	0.00767177	0.00541389	0.0298058	0.00294295	0.0214159	0.00226214	0.00332653	0	0.0151909	0.0170811	0.0345443	0.00635718	0.0118948	0.00125221	0.0258298	0.0327133	0.0117264	0.0024499	0.00567434	0.00070278	0.0379315	0.0230369	0.0158089	0	0.0345219	0.010582	0.0137338	0.0229371	0.0161566	0.0572583	0.0651084	0.042079	0.0249559	0.0750522	0.0421124	0	0	0	0.0173886	0.0108457	0.0193199	0.028315	0.0138579	0.0198677
OTU_161	___hq542913.1__gi:353741780_ ;k__fungi;p__fungi;c__kickxellomycotina;o__kickxellales;f__kickxellaceae;g__ramicandelaber;s__ramicandelaber sp.;superkingdom__eukaryota;subphylum__kickxellomycotina	0.158104	0.0131079	0.00563158	0.00247629	0.0153435	0.00135347	0.013247	0.0323725	0.0183565	0.00226214	0.00443538	0.00375451	0.00843939	0.078085	0.134339	0.00476788	0.00396495	0	0.532739	0.0171356	0.0410425	0.000816633	0.0034046	0	0.0803786	0.0279734	0.0175654	0.00566647	0.00143841	0.00176367	0.0235437	0.0258042	0.0253889	0	0	0.00311696	0.0440888	0.00938152	0.00280749	0.00348161	0	0	0.0604025	0.0759196	0.0434699	0.0348493	0.0346446	0.0840554
OTU_162	___gu553291.1__gi:292454288_ ;k__fungi;p__ascomycota;c__lecanoromycetes;o__lecanoromycetidae;f__physciaceae;g__rinodina;s__rinodina bischoffii;superkingdom__eukaryota;subkingdom__dikarya;subphylum__pezizomycotina;subclass lecanoromycetidae;suborder__caliciales	0.146035	0.0486864	0.0412983	0.00495258	0.0184123	0.00812084	0.0231823	0	0.0504803	0.00226214	0.00332653	0.0012515	0.102961	0.00244016	0.0460591	0.00317859	0.00660825	0	0.0274441	0.00311556	0.0161238	0.00653307	0.00907894	0.00070278	0.0388346	0.0279734	0.0175654	0.00188882	0.0373988	0	0	0.00286714	0.0161566	0	0.0455759	0	0.036602	0.0117269	0.0533423	0.00116054	0	0.00135422	0.331299	0	0.0265649	0.00653424	0.0398413	0.0703009
OTU_163	___ay587914.1__gi:51104886_ ;k__fungi;p__ascomycota;c__sordariomycetes;o__sordariales;f__lasiosphaeriaceae;g__lasiosphaeria;s__lasiosphaeria glabrata;subclass sordariomycetidae;subphylum__pezizomycotina;subkingdom__dikarya;superkingdom__eukaryota	0.0253449	0.0187255	0.0281579	0.00495258	0.0107405	0.025716	0.0480204	0.0397298	0.0244753	0.00113107	0.0110884	0.00500601	0.00675151	0.102487	0.0652504	0.00317859	0.0290763	0.00876545	0.0500452	0.01402	0.0307819	0.0048998	0.0181579	0.00070278	0.0496722	0.0312644	0.019322	0.0113329	0.0258915	0.0176367	0.0431635	0.0688113	0.0253889	0.0270386	0.395534	0.00311696	0.0332745	0.0750522	0.0308824	0.00116054	0	0.00270845	0.0356924	0.0232407	0.0241499	0.0566301	0.0242512	0.0213959
OTU_164	ascochyta sp. phy_36 ;k__fungi;p__ascomycota;c__dothideomycetes;o__pleosporales;f__pleosporales;g__ascochyta;s__ascochyta sp.;superkingdom__eukaryota;subkingdom__dikarya;subphylum__pezizomycotina;subclass pleosporomycetidae	0.0024138	0.00374511	0.00563158	0.693361	0.7012	1.0706	0.0066235	0.00882885	0.00305941	0.0248835	0.0598776	0.11639	0.00337576	0.00732047	0.00191913	0.0143037	0.0872289	0.0626104	0.00322872	0.0109044	0.00293161	0.00326653	0.00226974	0.00421668	0.00361252	0.00329099	0.00351309	0.0264435	0.00431524	0.00529101	0.00588593	0.00286714	0.00230808	0.00159051	0.0244157	0	0.00415932	0.00703614	0.00280749	0.00464215	0.00193442	0.00135422	0	0	0	0	0	0
OTU_165	___gu566291.1__gi:291498479_ ;k__fungi;p__ascomycota;c__sordariomycetes;o__sordariales;f__cephalothecaceae;g__phialemonium;s__taifanglania inflata;subclass sordariomycetidae;subphylum__pezizomycotina;subkingdom__dikarya;superkingdom__eukaryota	0.012069	0	0.0638246	0.00742887	0.00920613	0.00541389	0	0.242793	0.00152971	0	0.0177415	0.0012515	0.00675151	0.0146409	0.090199	0.00158929	0.0158598	0.00250441	0.00161436	0.0451756	0.0102606	0.0048998	0.00907894	0	0.00451565	0.120121	0.0105393	0.00188882	0	0.00881834	0.0647452	0.0229371	0.00230808	0.0111336	0.0162771	0.00311696	0.0207966	0.0351807	0.0814172	0	0	0.00135422	0.128127	0.00309876	0.00965997	0.00217808	0.00866116	0.00305656
OTU_166	___jf340292.1__gi:327180274_ ;k__fungi;p__ascomycota;c__sordariomycetes;o__hypocreales;f__nectriaceae;g__pseudocosmospora;s__cosmospora vilior;subclass hypocreomycetidae;subphylum__pezizomycotina;subkingdom__dikarya;superkingdom__eukaryota	0.012069	0.0262158	0.0300351	0.00495258	0.00767177	0.00812084	0.026494	0.0117718	0.0168268	0.00226214	0.00443538	0.00750901	0.0472606	0.0268417	0.015353	0.00476788	0.0118948	0.00125221	0.0129149	0.00778889	0.00879482	0.0024499	0.0113487	0.00140556	0.00993443	0.013164	0.0491832	0.0075553	0.00431524	0.015873	0.00588593	0.0344056	0.0138485	0.0286291	0.00976626	0.0436375	0.00998236	0.0281446	0.00842247	0	0.00386885	0	0.0292861	0.0201419	0.00724498	0.00871232	0.00519669	0.00458484
OTU_167	___eu040233.1__gi:157287138_ ;k__fungi;p__ascomycota;c__dothideomycetes;o__pleosporales;f__pleosporales;g__ochrocladosporium;s__ochrocladosporium elatum;superkingdom__eukaryota;subkingdom__dikarya;subphylum__pezizomycotina;subclass pleosporomycetidae	0.0325863	0.0112353	0.058193	0.0148577	0.00767177	0.0121813	0.013247	0.0456157	0.0565992	0.00226214	0.00110884	0.00500601	0.0421969	0.0732047	0.0633312	0.00953577	0.0132165	0.00375662	0.0355159	0.00934667	0.0527689	0.00571643	0.0113487	0.00140556	0.0252876	0.0213914	0.0439136	0.00566647	0.0230146	0.00352734	0.0765171	0.0286714	0.0207727	0.0127241	0.0341819	0.00623393	0.030779	0.0375261	0.0196524	0	0.00193442	0.00135422	0.048505	0.012395	0.0265649	0.0239589	0.0242512	0.0305656
OTU_168	___jn942157.1__gi:357434442_ ;k__fungi;p__ascomycota;c__sordariomycetes;o__sordariales;f__lasiosphaeriaceae;g__lasiosphaeris;s__lasiosphaeris hispida;subclass sordariomycetidae;subphylum__pezizomycotina;subkingdom__dikarya;superkingdom__eukaryota	0.0337932	0.00374511	0.0150176	0.00495258	0.00920613	0.0162417	0.140749	0.0147148	0.0275347	0.0033932	0.00665306	0.00375451	0.0303818	0.0488031	0.157368	0	0.026433	0.00375662	0.0387447	0.0124622	0.00439741	0.000816633	0.00226974	0.00210834	0.0388346	0.0230369	0.0456701	0.00566647	0.0546597	0.0176367	0.0706312	0	0.0230808	0.0174956	0.00976626	0.00311696	0.018301	0.0281446	0.0421124	0.00116054	0.00193442	0	0.014643	0.0216913	0.0265649	0.0413835	0.0363769	0.0152828
OTU_169	___gq331985.1__gi:254797324_ ;k__fungi;p__ascomycota;c__sordariomycetes;o__chaetosphaeriales;f__chaetosphaeriaceae;g__chloridium;s__chloridium sp.;subclass sordariomycetidae;subphylum__pezizomycotina;subkingdom__dikarya;superkingdom__eukaryota	0.0301725	0.0599217	0.105123	0.00990516	0.0199466	0.0121813	0.0165588	0.0250151	0.0780151	0.00113107	0.00443538	0.0112635	0.0236303	0.0902857	0.0249487	0.00476788	0.0198247	0.0125221	0.11462	0.0389444	0.021987	0.00163327	0.00680921	0	0.0442534	0.0427829	0.0245916	0.00188882	0.0215762	0.0194004	0.0313916	0.0315385	0.027697	0.0190861	0.0179048	0.00935089	0.0831864	0.0375261	0.0308824	0.00464215	0	0.00135422	0.0741303	0.0170432	0.0507148	0.0370274	0.0242512	0.0152828
OTU_170	___hm641690.1__gi:305959001_ ;k__fungi;p__fungi;c__mucoromycotina;o__mucorales;f__mucoraceae;g__mucor;s__mucor racemosus;superkingdom__eukaryota;subphylum__mucoromycotina;suborder__mucorineae;forma__mucor racemosus f. racemosus	0	0.00187255	0	0.0297155	0.0444963	0.201667	0.00496763	0.00441443	0.00611883	0.102927	0.439102	0.195234	0.0202545	0.00244016	0.00191913	0.0238394	0.257722	0.120212	0.00322872	0.00311556	0.00439741	0.0310321	0.0363158	0.0787114	0.00361252	0.00164549	0	0.0188882	0.29056	0.00176367	0	0.00860141	0	0.0270386	0.00651084	0.0654562	0.000831864	0.00234538	0.00280749	0.00232107	0.00967212	0.0446894	0.00549114	0	0	0.00217808	0.00866116	0.00611312
OTU_171	___hq607852.1__gi:312434331_ ;k__fungi;p__ascomycota;c__eurotiomycetes;o__chaetothyriales;f__herpotrichiellaceae;g__exophiala;s__exophiala sp.;subclass chaetothyriomycetidae;subphylum__pezizomycotina;subkingdom__dikarya;superkingdom__eukaryota	0.0253449	0.0243432	0.00750878	0.00990516	0.0122748	0.00135347	0.0149029	0.0103003	0.0183565	0.00113107	0.00110884	0	0.00843939	0.0219614	0.0230295	0.00317859	0.00396495	0.00250441	0.0322872	0.0327133	0.0718243	0	0.00226974	0.00070278	0.0198689	0.0691108	0.00351309	0	0.00431524	0.0335097	0.0470874	0.498882	0.0392374	0.00159051	0.0276711	0.00311696	0.0216285	0.0140723	0.0336899	0	0	0	0.00549114	0.00464814	0.00724498	0.0196027	0.0155901	0.00458484
OTU_172	___jf439486.1__gi:328923736_ ;k__fungi;p__fungi;c__mortierellomycotina;o__mortierellales;f__mortierellaceae;g__mortierella;s__mortierella humilis;superkingdom__eukaryota;subphylum__mortierellomycotina	0	0	0	0	0	0	0	0	0	0	0	0	0	0	0	0	0	0	0	0	0	0	0	0	0	0	0	0	0	0	0	0	0	0	0	0	0	0	0	0	0	0	0	0	0	0	0	0
OTU_173	___ay204635.1__gi:28974833_ ;k__fungi;p__ascomycota;c__leotiomycetes;o__helotiales;f__helotiaceae;g__tricladium;s__tricladium splendens;subphylum__pezizomycotina;subkingdom__dikarya;superkingdom__eukaryota	0.0036207	0.0299609	0.0525614	0.0272392	0.00920613	0.00270695	0.0248381	0.0470872	0.0428318	0.0180971	0.00887075	0.00625751	0.0810181	0.0756448	0.0422208	0.0111251	0.0105732	0.00375662	0.0145293	0.0342711	0.021987	0.00653307	0.077171	0	0.00361252	0.0493648	0.042157	0.00944412	0.0330835	0.0705467	0.0451255	0.0487413	0.212344	0.0349912	0.0472036	0.0467545	0.00332745	0.0656707	0.0786097	0.00116054	0	0	0.0128127	0.0976109	0.0821097	0.119794	0.190545	0.137545
OTU_174	___ef392531.1__gi:145307995_ ;k__fungi;p__entomophthoromycota;c__basidiobolomycetes;o__basidiobolales;f__basidiobolaceae;g__basidiobolus;s__basidiobolus haptosporus;superkingdom__eukaryota	0.0217242	0.0112353	0.00375439	0	0	0.00270695	0	0	0	0	0	0.0012515	0	0	0	0	0.075334	0.00125221	0	0	0	0.000816633	0	0	0	0.00329099	0.00175654	0	0.211447	0	0.437521	0.00286714	0	0	0.00162771	0	0.112302	0	0	0.00464215	0	0	0.00183038	0.00154938	0	0.00217808	0.00346446	0.00152828
OTU_175	fungal sp. ksl3 ;k__fungi;p__cryptomycota;c__cryptomycota;o__cryptomycota;f__cryptomycota;g__paramicrosporidium;s__fungal sp.;superkingdom__eukaryota	0.0820691	0.0205981	0.0412983	0.0198103	0.00306871	0.22603	0.0629233	0.0426728	0.0275347	0.0180971	0.00776191	0.00500601	0.0101273	0.31966	0.030706	0.00158929	0.0237897	0.00250441	0	0.267938	0.00293161	0.0048998	0.00226974	0	0.0198689	0.0773382	0.0333743	0.00566647	0.00575366	0.00529101	0.0176578	0	0.00230808	0.00954305	0.00162771	0.0374036	0.0166373	0	0.0701873	0	0	0.00135422	0.0173886	0.0185925	0.0482998	0.0348493	0.0242512	0.0290373
OTU_177	___am901689.1__gi:163257624_ ;k__fungi;p__basidiomycota;c__tremellomycetes;o__filobasidiales;f__filobasidiales;g__cryptococcus;s__cryptococcus sp.;superkingdom__eukaryota;subkingdom__dikarya	0.0024138	0.00749022	0.00187719	0.00247629	0.021481	0.0108278	0.00165588	0.00294295	0.00764853	0.00791748	0.0443538	0.022527	0.00168788	0	0	0.0190715	0.0026433	0.0200353	0	0.00155778	0.00293161	0.0024499	0.0204276	0.128609	0	0.00329099	0	0.00377765	0.0158226	0.167549	0.00196198	0	0.00461617	0.00159051	0.00162771	0.0888335	0.00166373	0.00234538	0.00280749	0.00116054	0	0.054169	0.000915189	0	0	0.0152466	0.0242512	0.00916969
OTU_178	___gu067752.1__gi:262069445_ ;k__fungi;p__ascomycota;c__sordariomycetes;o__hypocreales;f__nectriaceae;g__nectria;s__nectria sp.;subclass hypocreomycetidae;subphylum__pezizomycotina;subkingdom__dikarya;superkingdom__eukaryota	0	0	0.00750878	0	0	0.00135347	0	0.0058859	0.00152971	0	0.00221769	0.0012515	0.00168788	0.00244016	0	0.00158929	0	0.0162787	0.00322872	0.00155778	0.00439741	0.0326653	0.0181579	0	0.00722504	0	0	0.0623312	0	0.00176367	0.00196198	0	0	0.00477152	0	0	0	0	0.00280749	0	0	0.00135422	0	0.00464814	0	0.0130685	0.00346446	0.00305656
OTU_179	___ab025977.1__gi:7415552_ ;k__fungi;p__basidiomycota;c__microbotryomycetes;o__sporidiobolales;f__sporidiobolales;g__rhodotorula;s__rhodotorula glutinis;superkingdom__eukaryota;subkingdom__dikarya;subphylum__pucciniomycotina	0	0	0	0	0	0	0	0	0	0	0	0.0012515	0	0	0	0	0.0026433	0	0	0	0	0.00163327	0.00113487	0.01265	0	0	0	0	0	0	0	0	0	0	0	0	0	0	0	0	0	0	0	0.00309876	0	0.00217808	0	0.0336222
OTU_180	___aj972467.1__gi:109390715_ ;k__fungi;p__glomeromycota;c__glomeromycetes;o__glomerales;f__claroideoglomeraceae;g__claroideoglomus;s__glomus walkeri;superkingdom__eukaryota	0.0422415	0.0149804	0.0187719	0.00742887	0.00767177	0.0121813	0.0430528	0.0235436	0.0137674	0.00113107	0.00110884	0	0.0219424	0.0292819	0.00767651	0.00317859	0.00925155	0.00500883	0.0258298	0.0109044	0.0234528	0.00163327	0.0034046	0	0.110182	0.0148095	0.0333743	0.00188882	0.00431524	0.0335097	0.0274677	0.0716784	0.00692425	0.00795254	0.0406928	0.0280527	0.0357701	0.0351807	0.0308824	0	0	0.00135422	0.0210494	0.0433826	0.012075	0.0152466	0.0259835	0.010698
OTU_182	___gu934520.1__gi:300676346_ ;k__fungi;p__ascomycota;c__sordariomycetes;o__hypocreales;f__hypocreales;g__eucasphaeria;s__eucasphaeria capensis;superkingdom__eukaryota;subkingdom__dikarya;subphylum__pezizomycotina;subclass hypocreomycetidae	0.00965519	0.0243432	0.0525614	0.00990516	0.00920613	0.0108278	0.0347734	0.0117718	0.0336536	0	0.00110884	0.00500601	0.0236303	0.0268417	0.0326252	0.00635718	0.00132165	0.00375662	0.0226011	0.01402	0.0190554	0.000816633	0.0034046	0.00070278	0.0216751	0.0246824	0	0	0.0201378	0.00529101	0.00980988	0.0143357	0.0184647	0.0238576	0.0358096	0.00623393	0.0232922	0.0211084	0.0280749	0	0.00386885	0	0.0375228	0.0108457	0.0289799	0.0174246	0.0138579	0.00916969
OTU_183	fungal sp. ksl3 ;k__fungi;p__cryptomycota;c__cryptomycota;o__cryptomycota;f__cryptomycota;g__paramicrosporidium;s__fungal sp.;superkingdom__eukaryota	0.0555173	0.0374511	0.0300351	0	0.0383589	0.0148882	0.0562998	0	0.0122377	0.00226214	0.00110884	0.0012515	0.27006	0.0341622	0.0191913	0.00476788	0.0052866	0	0.0129149	0.0342711	0.00732901	0.00163327	0	0.00070278	0.0198689	0.0164549	0.0105393	0	0.00143841	0.010582	0.00588593	0.00860141	0	0.0270386	0.00651084	0.00155848	0.0374339	0.098506	0.01123	0	0.00386885	0	0.00732152	0.0139444	0.0241499	0.0784109	0.0277157	0.010698
OTU_184	___jn033223.1__gi:347803283_ ;k__fungi;p__basidiomycota;c__agaricomycetes;o__boletales;f__paxillaceae;g__neopaxillus;s__neopaxillus plumbeus;suborder__paxilineae;subclass agaricomycetidae;subkingdom__dikarya;superkingdom__eukaryota	0	0	0	0.00247629	0	0	0.00496763	0.0058859	0.0107079	0	0	0.010012	0.0236303	0	0	0	0.0052866	0.00125221	0.0193723	0.00623111	0.0161238	0	0.00113487	0	0.00180626	0.00164549	0.00175654	0	0.0129457	0.0141093	0.00784791	0	0.0184647	0	0	0.00155848	0	0.0140723	0.0224599	0	0	0	0.00915189	0.00309876	0.0169049	0.0348493	0.00519669	0
OTU_185	___jf439111.1__gi:344165555_ ;k__fungi;p__glomeromycota;c__glomeromycetes;o__glomerales;f__glomeraceae;g__glomus;s__glomus sp.;superkingdom__eukaryota	0	0	0	0	0	0	0.00496763	0	0	0	0	0	0.00337576	0	0	0	0	0	0	0	0	0	0	0	0	0	0	0.00377765	0	0.00176367	0	0	0	0	0	0	0	0	0	0	0	0	0	0.00154938	0	0.0130685	0	0.00152828
OTU_186	holtermanniella festucosa ;k__fungi;p__basidiomycota;c__tremellomycetes;o__holtermanniales;f__holtermanniales;g__holtermanniella;s__holtermanniella festucosa;superkingdom__eukaryota;subkingdom__dikarya	0.0205173	0.0299609	0.0563158	0.0866701	0.0153435	0.0433111	0.00993526	0	0.0474209	0.0192282	0.0199592	0.0362936	0.0286939	0.0219614	0.0230295	0.00476788	0.0171814	0.0288008	0.0435878	0.0233667	0.00879482	0.0024499	0.0215625	0.139853	0.013547	0.0427829	0.0333743	0.0113329	0.00719207	0.0388007	0.00784791	0	0.00923233	0.00159051	0	0.00311696	0.0224603	0.0234538	0.0364974	0.00464215	0	0.00270845	0.0210494	0.0108457	0.0169049	0.0108904	0.0190545	0.0244525
OTU_187	uncultured protoventuria ;k__fungi;p__ascomycota;c__dothideomycetes;o__venturiales;f__venturiaceae;g__protoventuria;s__protoventuria sp.;subphylum__pezizomycotina;subkingdom__dikarya;superkingdom__eukaryota	0.0386208	0.0468138	0.0206491	0.00247629	0.0153435	0.0216556	0.0231823	0.0456157	0.0688368	0.00113107	0.00443538	0.0012515	0.0202545	0.0146409	0.117067	0.00476788	0.00660825	0.00500883	0.0242154	0.0171356	0.0102606	0.00163327	0.00453947	0.00070278	0.0478659	0.0658198	0.042157	0.00188882	0.0215762	0.00352734	0.00784791	0.16056	0.0461617	0.0143146	0.0179048	0.00467545	0.0224603	0.0398715	0.0224599	0.00116054	0	0	0.0247101	0.0108457	0.00482998	0.0196027	0.0121256	0.0351505
OTU_188	fungal sp. ksl3 ;k__fungi;p__cryptomycota;c__cryptomycota;o__cryptomycota;f__cryptomycota;g__paramicrosporidium;s__fungal sp.;superkingdom__eukaryota	0.0205173	0.0149804	0.00938597	0	0.00920613	0.00270695	0.0248381	0.0338439	0.00458912	0	0.00776191	0	0.0573878	0	0	0	0.00132165	0.00250441	0	0.00623111	0.00293161	0	0.00113487	0	0.0451565	0.106957	0.00175654	0	0.0373988	0.00881834	0.00392395	0.00286714	0.0161566	0.0143146	0.0179048	0.00155848	0.000831864	0.00469076	0	0	0	0	0.0448443	0.0480307	0.11109	0.0130685	0.0173223	0.0244525
OTU_189	___am292050.1__gi:110835640_ ;k__fungi;p__ascomycota;c__ascomycota;o__ascomycota;f__ascomycota;g__trichocladium;s__trichocladium asperum;superkingdom__eukaryota;subkingdom__dikarya	0.00724139	0.00749022	0.0150176	0.00742887	0.00767177	0.00406042	0.013247	0.0103003	0.0168268	0.0226214	0.0232857	0.0237785	0.0118151	0.00244016	0.015353	0.0254287	0.0330412	0.036314	0.00484308	0.0109044	0.00732901	0.00898297	0.0102138	0.00070278	0.0144501	0.0181004	0.00702617	0.0396653	0	0.00176367	0.00784791	0.00860141	0.00461617	0.0143146	0.00325542	0.00155848	0.0399295	0.00469076	0.00280749	0.00464215	0	0	0.0109823	0.0170432	0.00965997	0.0130685	0.0242512	0.00611312
OTU_190	___af181709.1__gi:6760344_ ;k__fungi;p__ascomycota;c__dothideomycetes;o__pleosporales;f__phaeosphaeriaceae;g__parastagonospora;s__phaeosphaeria nodorum;suborder__pleosporineae;subclass pleosporomycetidae;subphylum__pezizomycotina;subkingdom__dikarya;superkingdom__eukaryota	0.0012069	0	0.00187719	0.160959	1.54356	0.125873	0.00331175	0	0	0.0033932	0.0177415	0.012515	0.00168788	0.00488031	0.00383826	0.0143037	0.0145381	0.00876545	0.00161436	0.00623111	0	0.0024499	0.0034046	0	0.00180626	0	0	0.00188882	0.00431524	0.00529101	0.00392395	0.00286714	0.00230808	0	0	0.00311696	0.00166373	0.00234538	0	0.00232107	0.00193442	0.00270845	0	0	0	0	0	0
OTU_192	___af391039.1__gi:18092113_ ;k__fungi;p__basidiomycota;c__agaricomycetes;o__agaricales;f__agaricaceae;g__melanophyllum;s__melanophyllum haematospermum;subclass agaricomycetidae;subkingdom__dikarya;superkingdom__eukaryota	0.0313794	0.0393236	0.108877	0.0272392	0.0138092	0.0121813	0.026494	0.0117718	0.036713	0.00226214	0.00332653	0	0.0472606	0.0170811	0.0249487	0.00476788	0.00660825	0	0.0274441	0.0716578	0.0205212	0.000816633	0.00113487	0.00140556	0.027997	0.0460738	0.0474267	0.00188882	0.00719207	0.00529101	0.0196198	0.0372728	0.0138485	0.0222671	0.039065	0.00935089	0.042425	0.0328353	0.0280749	0	0.00580327	0	0.0118975	0.0108457	0.00965997	0.0152466	0.0294479	0.0336222
OTU_194	cadophora sp. ref033 ;k__fungi;p__ascomycota;c__leotiomycetes;o__helotiales;f__helotiales;g__cadophora;s__cadophora sp.;superkingdom__eukaryota;subkingdom__dikarya;subphylum__pezizomycotina	0.0386208	0.0262158	0.0150176	0.0123814	0.0168779	0.0175951	0.0347734	0.147148	0.0336536	0.0033932	0.00332653	0.002503	0.0590757	0.0195212	0.0249487	0.00476788	0.0158598	0.00125221	0.00484308	0.0186933	0.0263845	0.00408317	0.0034046	0	0.0442534	0.0115185	0.0333743	0.00377765	0.024453	0.0335097	0.0470874	0.0344056	0.0438536	0.0477152	0.0162771	0.0109094	0.0207966	0.0469076	0.0224599	0	0	0	0.0219645	0.0170432	0.0193199	0.0435616	0.022519	0.00916969
OTU_195	___af383963.1__gi:14579569_ ;k__fungi;p__ascomycota;c__dothideomycetes;o__pleosporales;f__massarinaceae;g__massarina;s__massarina rubi;suborder__massarineae;subclass pleosporomycetidae;subphylum__pezizomycotina;subkingdom__dikarya;superkingdom__eukaryota	0.0156897	0.0131079	0.0319123	0.00495258	0.0138092	0.00135347	0.0231823	0.0147148	0.0382427	0	0.0166327	0.0012515	0.00168788	0.0512433	0.0364634	0	0.0052866	0.00375662	0.0355159	0.0109044	0.0366451	0.000816633	0.00794407	0	0.0117407	0.0312644	0.00526963	0.0132218	0.00719207	0.010582	0.0137338	0.0401399	0.0184647	0.0238576	0.011394	0.0187018	0.0199647	0.0164177	0.01123	0	0	0.00270845	0.0320316	0.0511295	0.0507148	0.0413835	0.0121256	0.0244525
OTU_196	___aj876481.1__gi:84452395_ ;k__fungi;p__ascomycota;c__dothideomycetes;o__dothideales;f__aureobasidiaceae;g__aureobasidium;s__aureobasidium pullulans;subclass dothideomycetidae;subphylum__pezizomycotina;subkingdom__dikarya;superkingdom__eukaryota	0.0012069	0	0.00563158	0.101528	0.047565	0.0568459	0.00331175	0.00147148	0.00458912	0.0418495	0.0266123	0.0926111	0.00337576	0	0	0.00317859	0.00660825	0.00500883	0.00161436	0.00155778	0.00293161	0.000816633	0.00453947	0.0780086	0	0.00493648	0.00526963	0.00188882	0.00431524	0.00176367	0	0.00573427	0.00230808	0.00477152	0.00162771	0.00155848	0.0199647	0	0.00561498	0.00232107	0.00773769	1.00077	0	0	0.00482998	0.00435616	0.0103934	0.0275091
OTU_197	___aj309326.1__gi:14161129_ ;k__fungi;p__ascomycota;c__sordariomycetes;o__hypocreales;f__ophiocordycipitaceae;g__ophiocordyceps;s__ophiocordyceps sobolifera;subclass hypocreomycetidae;subphylum__pezizomycotina;subkingdom__dikarya;superkingdom__eukaryota	0.248621	0.00187255	0.00187719	0.00495258	0.00153435	0.00135347	0.0115911	0.0058859	0.00458912	0.00113107	0	0.0012515	0.00168788	0	0.00191913	0.00158929	0.00132165	0	0.00322872	0.00155778	0.00732901	0	0	0	0.0677348	0	0.0105393	0.00188882	0	0	0.0137338	0.02007	0.00923233	0	0	0	0.00166373	0.00469076	0	0	0	0	0.000915189	0	0	0.00217808	0	0.010698
OTU_198	___fj827722.1__gi:268636580_ ;k__fungi;p__chytridiomycota;c__chytridiomycetes;o__spizellomycetales;f__spizellomycetaceae;g__spizellomyces;s__spizellomyces plurigibbosus;superkingdom__eukaryota	0.0012069	0.00374511	0	0	0	0.00270695	0.00827938	0.0206007	0.0183565	0	0	0.0012515	0.00168788	0.00488031	0.00191913	0	0	0	0.00968617	0	0.00293161	0.000816633	0	0	0	0	0.00526963	0	0	0.00352734	0	0	0.00230808	0.00318102	0	0	0.00748677	0	0	0	0.00386885	0	0.0283709	0.00774689	0.00724498	0.00871232	0.0103934	0
OTU_199	___jn159575.1__gi:347984008_ ;k__fungi;p__basidiomycota;c__agaricomycetes;o__agaricales;f__psathyrellaceae;g__coprinellus;s__coprinellus flocculosus;subclass agaricomycetidae;subkingdom__dikarya;superkingdom__eukaryota	0	0.00187255	0	0	0.0245497	0.00135347	0.00165588	0.104475	0	0.00113107	0	0	0	0.00244016	0.0786842	0	0.0859072	0	0	0.00155778	0.0014658	0	0.00680921	0	0	0	0.00175654	0.0509982	0.00143841	0	0.00196198	0	0	0	0.00325542	0	0	0	0.00280749	0	0	0	0.00366076	0	0.00241499	0	0	0
OTU_201	___fj210527.1__gi:226442121_ ;k__fungi;p__ascomycota;c__dothideomycetes;o__pleosporales;f__pleosporaceae;g__curvularia;s__curvularia sp.;suborder__pleosporineae;subclass pleosporomycetidae;subphylum__pezizomycotina;subkingdom__dikarya;superkingdom__eukaryota	0.0012069	0.00561766	0.0187719	0.15353	0.122748	0.22197	0.039741	0.0103003	0.0321238	0.0610777	0.0232857	0.0287845	0.00843939	0.00244016	0.00191913	0.0254287	0.0118948	0.167796	0.00645745	0.00934667	0	0.000816633	0	0.0161639	0.0153532	0.00164549	0.0140523	0.117107	0.0359604	0	0.00196198	0.00286714	0.00692425	0.00636203	0	0	0.000831864	0.0328353	0	0	0	0	0.0164734	0.0139444	0	0.0130685	0.00866116	0.00458484
OTU_202	___ab194768.1__gi:55700842_ ;k__fungi;p__basidiomycota;c__agaricomycetes;o__thelephorales;f__typhulaceae;g__typhula;s__typhula ishikariensis;subkingdom__dikarya;superkingdom__eukaryota	0	0	0	0	0	0	0	0	0	0	0.00110884	0	0	0	0	0	0	0	0	0	0	0	0	0	0	0	0	0	0	0	0	0	0	0	0	0	0	0	0	0	0	0	0.0430139	0.00464814	0	0.00217808	0.00173223	0.00305656
OTU_203	___ay154714.1__gi:32394892_ ;k__fungi;p__ascomycota;c__dothideomycetes;o__pleosporales;f__pleosporaceae;g__alternaria;s__alternaria brassicae;suborder__pleosporineae;subclass pleosporomycetidae;subphylum__pezizomycotina;subkingdom__dikarya;superkingdom__eukaryota	0.0012069	0.00374511	0	0.198103	0.0966643	0.169184	0.00496763	0.00441443	0.0107079	0.0814369	0.725184	0.0700841	0.00168788	0.00244016	0.00191913	0.0397324	0	0.0175309	0	0.00467333	0.00293161	0.0106162	0.00567434	0.00210834	0.00270939	0	0.00175654	0.03211	0	0	0.00196198	0	0.00461617	0.00159051	0.00325542	0	0.00249559	0.00234538	0.00280749	0.00232107	0	0.00135422	0	0	0	0	0	0
OTU_204	___aj301998.1__gi:11877342_ ;k__fungi;p__ascomycota;c__sordariomycetes;o__hypocreales;f__hypocreales;g__myrothecium;s__myrothecium sp.;superkingdom__eukaryota;subkingdom__dikarya;subphylum__pezizomycotina;subclass hypocreomycetidae	0.146035	0.0617943	0.0337895	0.0123814	0.021481	0.0189486	0.0612674	0.0338439	0.0336536	0.0033932	0.00554422	0.00750901	0.013503	0.0146409	0.0537356	0.00317859	0.00660825	0	0.0597314	0.01402	0.0454399	0.00326653	0.0124835	0.00070278	0.0433503	0.0246824	0.0228351	0.0169994	0.0431524	0.0123457	0.0215817	0.0286714	0.0115404	0.00954305	0.00488313	0.00779241	0.018301	0.0539438	0.0280749	0.00116054	0	0	0.0851126	0.00464814	0.012075	0.0479178	0.00866116	0.0320939
OTU_205	___dq682581.1__gi:112418328_ ;k__fungi;p__ascomycota;c__sordariomycetes;o__hypocreales;f__nectriaceae;g__fusarium;s__fusarium sp.;subclass hypocreomycetidae;subphylum__pezizomycotina;subkingdom__dikarya;superkingdom__eukaryota	0.00603449	0.00749022	0.00375439	0.00495258	0.00306871	0.00135347	0.00331175	0.00294295	0.00305941	0.0147039	0.00554422	0.0137665	0.00843939	0.00732047	0.00191913	0.0238394	0.0105732	0.0137743	0.00322872	0.00155778	0.00293161	0.0171493	0.0351809	0	0.00722504	0.00493648	0.00175654	0.0226659	0.00143841	0.00352734	0.00196198	0.00286714	0.00230808	0	0.00651084	0.00311696	0.00332745	0.00234538	0	0.00696322	0	0.00406267	0.0164734	0.0170432	0.00965997	0.00653424	0.0155901	0.0183394
OTU_207	___hq897801.1__gi:339739829_ ;k__fungi;p__ascomycota;c__sordariomycetes;o__hypocreales;f__nectriaceae;g__cylindrocladium;s__cylindrocladium sp.;subclass hypocreomycetidae;subphylum__pezizomycotina;subkingdom__dikarya;superkingdom__eukaryota	0.0132759	0.00936277	0.0319123	0.00495258	0.00153435	0	0.0066235	0	0.00764853	0.00678641	0.0188504	0.00625751	0.013503	0.0146409	0.0268678	0.0651611	0.0026433	0.0125221	0.00322872	0.02804	0.0014658	0.0187826	0.00113487	0	0.0180626	0.00164549	0.00175654	0.0358877	0.00287683	0	0.00196198	0	0	0	0	0.00155848	0.00998236	0.00938152	0	0.00116054	0.00193442	0	0.0741303	0.0356357	0	0.00871232	0.0173223	0.0443201
OTU_208	___fj903326.1__gi:237641545_ ;k__fungi;p__ascomycota;c__lecanoromycetes;o__lecanoromycetes;f__lecanoromycetes;g__sarea;s__sarea sp.;superkingdom__eukaryota;subkingdom__dikarya;subphylum__pezizomycotina	0.0494828	0.0449413	0.0187719	0.0123814	0.0276184	0.0108278	0.0430528	0.0250151	0.0489506	0.00113107	0.0166327	0.0012515	0.0185667	0.031722	0.015353	0.00317859	0.0079299	0.00375662	0.0242154	0.0373867	0.0410425	0.00163327	0.00567434	0.00070278	0.0578003	0.0246824	0.0368874	0.00377765	0	0.015873	0.0451255	0.0401399	0.0138485	0.00636203	0.00651084	0.00623393	0.0324427	0.0281446	0.0758022	0.00116054	0	0	0.014643	0.00309876	0.00724498	0.028315	0.0121256	0.0336222
OTU_209	___ef031110.1__gi:117571279_ ;k__fungi;p__fungi;c__mortierellomycotina;o__mortierellales;f__mortierellaceae;g__mortierella;s__mortierella sp.;superkingdom__eukaryota;subphylum__mortierellomycotina	0.0386208	0.0468138	0.0356667	0.00990516	0.0107405	0.0108278	0.0364293	0.0264866	0.0183565	0.0124417	0.00665306	0.0137665	0.0168788	0.0561236	0.0422208	0.00953577	0.0118948	0.0225397	0.0161436	0.0327133	0.0381109	0.000816633	0.00567434	0.00070278	0.0451565	0.0197459	0.0158089	0.00944412	0.0215762	0.010582	0.0196198	0.0372728	0.0369293	0.0206766	0.00976626	0.00467545	0.0282834	0.018763	0.0168449	0	0	0	0.0256253	0.0170432	0.01449	0.0174246	0.0103934	0.0168111
OTU_210	___ef196810.1__gi:124126991_ ;k__fungi;p__ascomycota;c__saccharomycetes;o__saccharomycetales;f__metschnikowiaceae;g__kodamaea;s__kodamaea ohmeri;subphylum__saccharomycotina;subkingdom__dikarya;superkingdom__eukaryota	0.0325863	0.00749022	0.00375439	0.0198103	0.0153435	0.00406042	0.0314616	0.00882885	0.0275347	0.00678641	0.00110884	0.00500601	0	0.0219614	0.0287869	0	0.00660825	0.00125221	0	0.00311556	0.0102606	0	0.00794407	0	0.0180626	0.0411374	0.00351309	0	0	0.00881834	0.00980988	0.0286714	0.0184647	0.00159051	0.011394	0.0140263	0.0116461	0.0164177	0.0196524	0.00116054	0	0	0.0723	0.0836664	0	0.0130685	0.0121256	0.0305656
OTU_211	hymenoscyphus sp. fc_2727 ;k__fungi;p__ascomycota;c__leotiomycetes;o__helotiales;f__helotiaceae;g__hymenoscyphus;s__hymenoscyphus sp.;subphylum__pezizomycotina;subkingdom__dikarya;superkingdom__eukaryota	0	0	0.00187719	0.0198103	0.00153435	0.00135347	0.00165588	0.00294295	0	0.00226214	0.00110884	0	0.00168788	0.00976062	0.00383826	0.00158929	0.00132165	0	0.00484308	0.0436178	0	0	0	0.00070278	0	1.39867	0.00175654	0.00188882	0	0	0	0	0.00230808	0.00159051	0.00162771	0	0.00166373	0.00234538	0.00280749	0	0.00386885	0.00135422	0	0	0	0	0.00173223	0.00305656
OTU_213	___ay194547.1__gi:34014787_ ;k__fungi;p__basidiomycota;c__agaricomycetes;o__agaricales;f__bolbitiaceae;g__conocybe;s__conocybe sp.;subclass agaricomycetidae;subkingdom__dikarya;superkingdom__eukaryota	0	0	0	0.00247629	0	0	0.00331175	0	0.00764853	0.00113107	0.00110884	0.002503	0.00168788	0.00488031	0	0	0.00132165	0.00250441	0	0	0	0.00163327	0	0.00070278	0.00270939	0	0	0.00377765	1.43122	0	0	0.00573427	0	0.00477152	0.00488313	0.00155848	0.00332745	0	0.00280749	0.00116054	0	0.00135422	0	0	0	0	0	0
OTU_214	mortierella sp. 02nh02 ;k__fungi;p__mucoromycota;c__mortierellomycetes;o__mortierellales;f__mortierellaceae;g__mortierella;s__mortierella sp.;superkingdom__eukaryota;subphylum__mortierellomycotina	0.0168966	0.0187255	0.048807	0.0123814	0.00153435	0.00676737	0.115911	0.00735738	0.0244753	0.0271456	0.0110884	0.0438026	0.0388212	0	0.0537356	0.0445002	0.0026433	0.0175309	0.0145293	0.0218089	0.104072	0.00326653	0.0102138	0	0.0388346	0.00493648	0.0790444	0.00377765	0.00143841	0.00176367	0.0156958	0.00286714	0.027697	0.00159051	0	0.00155848	0.0207966	0.0422169	0.01123	0	0	0.00135422	0.0366076	0.00154938	0	0.00871232	0.00173223	0.0443201
OTU_216	___ay729070.1__gi:53771796_ ;k__fungi;p__ascomycota;c__sordariomycetes;o__hypocreales;f__nectriaceae;g__fusarium;s__fusarium sp.;subclass hypocreomycetidae;subphylum__pezizomycotina;subkingdom__dikarya;superkingdom__eukaryota	0.0036207	0.00749022	0.00187719	0	0	0	0.00331175	0.00294295	0.00152971	0.00791748	0.00221769	0.00500601	0.00843939	0.00488031	0	0.00158929	0.00132165	0.00375662	0	0	0.0014658	0.0024499	0.0158881	0.0470863	0.00180626	0	0	0.0075553	0.00143841	0.00352734	0.00392395	0	0	0	0.00651084	0.00311696	0.000831864	0	0	0	0	0.0203134	0.00732152	0.00619751	0.012075	0.00217808	0.0121256	0.00611312
OTU_217	___ay061726.1__gi:22024505_ ;k__fungi;p__basidiomycota;c__agaricomycetes;o__russulales;f__russulaceae;g__russula;s__russula violeipes;subkingdom__dikarya;superkingdom__eukaryota	0.13638	0.016853	0.0131404	0.00742887	0.026084	0.00270695	0.0149029	0.00147148	0.0902527	0.00226214	0	0.0012515	0.00168788	0.0610039	0.00767651	0	0.0079299	0	0	0.0155778	0.0190554	0.0024499	0.0034046	0	0.00361252	0.013164	0.00175654	0.00188882	0.00143841	0.010582	0.0215817	0.0114685	0	0	0.00162771	0	0.0141417	0	0.01123	0	0.00386885	0	0.000915189	0.0743702	0.0313949	0.0522739	0.0415736	0.0137545
OTU_220	___fj235087.1__gi:209779011_ ;k__fungi;p__ascomycota;c__dothideomycetes;o__pleosporales;f__pleosporaceae;g__cochliobolus;s__cochliobolus sp.;suborder__pleosporineae;subclass pleosporomycetidae;subphylum__pezizomycotina;subkingdom__dikarya;superkingdom__eukaryota	0.00482759	0	0.00563158	0.208008	0.127351	0.232797	0	0	0.0122377	0.125549	0.0654218	0.0788446	0	0	0.00191913	0.0905898	0.146703	0.00375662	0	0	0.0014658	0.0432816	0.00226974	0.00070278	0.00090313	0	0.00175654	0.0358877	0.0100689	0.00176367	0	0	0	0	0	0.00155848	0	0	0.00280749	0	0	0	0	0	0	0	0	0.00152828
OTU_221	___eu833654.1__gi:212276602_ ;k__fungi;p__basidiomycota;c__agaricomycetes;o__agaricales;f__lycoperdaceae;g__disciseda;s__disciseda candida;subclass agaricomycetidae;subkingdom__dikarya;superkingdom__eukaryota	0.0446552	0.0149804	0.0168947	0.00990516	0.00460306	0.00135347	0.00993526	0.0103003	0.0305941	0.00113107	0.00110884	0.00375451	0.0354454	0.0146409	0.0134339	0	0.00132165	0.00125221	0.00645745	0.0186933	0.00879482	0.000816633	0.00226974	0.00070278	0.0162563	0.0115185	0.00878272	0.00188882	0.0100689	0.015873	0.0215817	0.00860141	0.0253889	0.00954305	0.00651084	0.0280527	0.030779	0.0164177	0.00561498	0.00116054	0	0	0.0109823	0.0201419	0.00965997	0.00871232	0.0155901	0.0076414
OTU_222	___hm208739.1__gi:300915789_ ;k__fungi;p__glomeromycota;c__glomeromycetes;o__diversisporales;f__diversisporales;g__entrophospora;s__entrophospora sp.;superkingdom__eukaryota	0.0265518	0.0187255	0.00187719	0.00990516	0.00767177	0.00541389	0.0215264	0.0294295	0.0504803	0.00226214	0.00332653	0.00375451	0.0118151	0.0122008	0.00191913	0	0.0026433	0	0.0500452	0.0155778	0	0.000816633	0.00226974	0	0.0243845	0.00493648	0.00351309	0.00188882	0.00287683	0	0.0176578	0.00286714	0.0484697	0	0	0.00155848	0.00249559	0.0164177	0.0196524	0	0	0	0.0356924	0.0371851	0.00241499	0.028315	0.0277157	0.0198677
OTU_223	pluteus romellii ;k__fungi;p__basidiomycota;c__agaricomycetes;o__agaricales;f__pluteaceae;g__pluteus;s__pluteus romellii;subclass agaricomycetidae;subkingdom__dikarya;superkingdom__eukaryota	0.0229311	0.0205981	0.00375439	0.00495258	0.0122748	0.00406042	0.0165588	0.00294295	0.0321238	0	0.00110884	0.0012515	0.0118151	0.0341622	0.00575738	0	0	0.00125221	0.00968617	0.0171356	0.0322477	0.00163327	0.00794407	0	0.048769	0.0740473	0.0175654	0	0.0201378	0.031746	0.00980988	0	0.00692425	0.0477152	0.00325542	0.0155848	0.00998236	0	0.0140375	0.00116054	0	0	0.014643	0	0.00965997	0.0217808	0	0.00611312
OTU_224	___dq525502.1__gi:103000433_ ;k__fungi;p__ascomycota;c__lecanoromycetes;o__acarosporales;f__acarosporaceae;g__pleopsidium;s__pleopsidium flavum;subclass acarosporomycetidae;subphylum__pezizomycotina;subkingdom__dikarya;superkingdom__eukaryota	0.0144828	0.0112353	0.00938597	0	0.00613742	0.00541389	0.0198705	0.0103003	0.0489506	0.00113107	0.00110884	0.0012515	0.0320697	0.0244016	0.0191913	0	0.00132165	0.00125221	0.0193723	0.0529645	0.0234528	0	0.0034046	0	0.0316096	0.0148095	0.0720183	0	0.024453	0.00352734	0.0235437	0.0143357	0.0230808	0.00159051	0.00976626	0.00155848	0.0341064	0.0422169	0.0140375	0	0	0	0.0128127	0.00154938	0	0.0130685	0.00692893	0.00611312
OTU_225	___fj903326.1__gi:237641545_ ;k__fungi;p__ascomycota;c__lecanoromycetes;o__lecanoromycetes;f__lecanoromycetes;g__sarea;s__sarea sp.;superkingdom__eukaryota;subkingdom__dikarya;subphylum__pezizomycotina	0.0422415	0.016853	0.0319123	0.00990516	0.00153435	0.00676737	0.0231823	0.0294295	0.0137674	0.00226214	0.00332653	0.00375451	0.0168788	0.0244016	0.074846	0.00476788	0.022468	0.00375662	0.0242154	0.0373867	0.00732901	0	0.0034046	0	0.0298033	0.00164549	0.0281047	0	0.00863049	0.0194004	0.00784791	0.0286714	0.0161566	0.00477152	0.00325542	0.00155848	0.0116461	0.0164177	0.00561498	0	0	0	0.00640633	0.0232407	0.00241499	0.0348493	0.0103934	0.0305656
OTU_226	tricharina praecox var. praecox ;k__fungi;p__ascomycota;c__pezizomycetes;o__pezizales;f__pyronemataceae;g__tricharina;s__tricharina praecox;varietas tricharina praecox var. praecox;subphylum__pezizomycotina;subkingdom__dikarya;superkingdom__eukaryota	0.0024138	0.00187255	0.00375439	0.00247629	0	0.00135347	0.00331175	0	0	0.00113107	0.211789	0	0	0.214734	0	0	0.00132165	0	0	0.00155778	0.00293161	0.000816633	0	0	0.00090313	0.273152	0.00526963	0	0	0.00176367	0	0	0	0.00318102	0.00325542	0.00311696	0.00415932	0	0.00280749	0	0.00193442	0.00135422	0	0	0	0	0	0.0641878
OTU_227	___jf439486.1__gi:328923736_ ;k__fungi;p__fungi;c__mortierellomycotina;o__mortierellales;f__mortierellaceae;g__mortierella;s__mortierella humilis;superkingdom__eukaryota;subphylum__mortierellomycotina	0	0	0	0	0	0	0.00165588	0	0	0	0	0	0	0	0	0	0	0	0	0	0	0	0	0	0	0	0	0	0	0	0	0	0	0	0	0	0	0	0	0	0	0	0	0.94667	0	0.00653424	0.00866116	0
OTU_228	___ay706329.1__gi:51340262_ ;k__fungi;p__ascomycota;c__leotiomycetes;o__leotiomycetes;f__leotiomycetes;g__leohumicola;s__leohumicola minima;superkingdom__eukaryota;subkingdom__dikarya;subphylum__pezizomycotina	0.0229311	0.0205981	0.0412983	0	0.00153435	0.00541389	0.00496763	0.0206007	0.0168268	0.00113107	0.00554422	0	0.00675151	0.0292819	0.0134339	0	0.00925155	0.00250441	0.0129149	0.00623111	0.0322477	0	0.00226974	0.00070278	0.0216751	0.0362009	0.0140523	0.00566647	0.0158226	0.0282187	0.0235437	0.0258042	0.0207727	0.0174956	0.0260434	0.00467545	0.0149735	0.0117269	0.0336899	0	0	0	0.00366076	0	0	0.0304931	0.00692893	0.0351505
OTU_230	___fm955447.1__gi:282944063_ ;k__fungi;p__ascomycota;c__sordariomycetes;o__sordariales;f__lasiosphaeriaceae;g__cladorrhinum;s__cladorrhinum samala;subclass sordariomycetidae;subphylum__pezizomycotina;subkingdom__dikarya;superkingdom__eukaryota	0	0.00187255	0	0.00247629	0.00153435	0	0.00331175	0.0103003	0	0.00565534	0	0.002503	0	0	0	0	0	0.00626104	0.00161436	0.00311556	0.0014658	0	0.00113487	0.00281112	0	0	0.00351309	1.14274	0	0	0.00196198	0	0.00230808	0	0	0.00155848	0.00748677	0	0	0	0	0	0	0	0	0	0	0
OTU_231	___ay999133.1__gi:67644108_ ;k__fungi;p__ascomycota;c__sordariomycetes;o__sordariales;f__chaetomiaceae;g__zopfiella;s__zopfiella erostrata;subclass sordariomycetidae;subphylum__pezizomycotina;subkingdom__dikarya;superkingdom__eukaryota	0.0012069	0.159167	0.00750878	0	0.138092	0.00135347	0.0463645	0.00441443	0.0107079	0.00113107	0.00332653	0	0	0	0.00575738	0	0	0.00375662	0.00484308	0.00311556	0.0249186	0.00163327	0	0	0.00541878	0	0	0.00566647	0.214324	0.00176367	0.00196198	0	0.0253889	0	0.00162771	0	0.00415932	0.105542	0.00561498	0	0.00193442	0.00270845	0	0	0.00965997	0	0.00692893	0.0657161
OTU_232	___jn191309.1__gi:355469181_ ;k__fungi;p__ascomycota;c__orbiliomycetes;o__orbiliales;f__orbiliaceae;g__arthrobotrys;s__arthrobotrys conoides;subphylum__pezizomycotina;subkingdom__dikarya;superkingdom__eukaryota	0.0024138	0	0	0	0.00153435	0.00135347	0	0.00147148	0	0	0.00110884	0.0012515	0.00168788	0	0	0.00158929	0.00132165	0.00125221	0.00161436	0	0.0014658	0.00163327	0	0.00210834	0.00180626	0	0	1.41473	0	0	0.00196198	0.00286714	0.00230808	0	0.00162771	0	0	0.00234538	0	0	0	0.00270845	0	0	0	0	0	0
OTU_233	sporothrix inflata ;k__fungi;p__ascomycota;c__sordariomycetes;o__ophiostomatales;f__ophiostomataceae;g__sporothrix;s__sporothrix inflata;subclass sordariomycetidae;subphylum__pezizomycotina;subkingdom__dikarya;superkingdom__eukaryota	0	0.00374511	0.00375439	0	0	0	0	0	0.00458912	0.00113107	0	0	0.00675151	0.0219614	0.0767651	0.00158929	0.00132165	0.00125221	0.00645745	0.0155778	0.021987	0.00326653	0.00907894	0.00070278	0.00090313	0.0246824	0.0122958	0	0.0186994	0.0617284	0.0431635	0.0258042	0.0646263	0.0270386	0.0699915	0.0405205	0	0.0609799	0.0449198	0	0	0	0.000915189	0.032537	0.0313949	0.026137	0.00346446	0.00611312
OTU_234	___eu139138.1__gi:160552301_ ;k__fungi;p__ascomycota;c__eurotiomycetes;o__chaetothyriales;f__herpotrichiellaceae;g__rhinocladiella;s__rhinocladiella sp.;subclass chaetothyriomycetidae;subphylum__pezizomycotina;subkingdom__dikarya;superkingdom__eukaryota	0.012069	0.0224706	0.0638246	0	0.00920613	0.00812084	0.0115911	0.0779882	0.110139	0	0.00332653	0.0012515	0.013503	0.0195212	0.0537356	0	0.00132165	0.00125221	0.0226011	0.0124622	0.00439741	0.000816633	0.00113487	0	0.0171595	0.00164549	0.0263481	0.00188882	0	0.00529101	0.00980988	0.0458742	0.00692425	0	0	0	0.00499118	0.0445622	0.0140375	0	0.00193442	0.00135422	0.0219645	0.0201419	0	0.0174246	0.00519669	0.010698
OTU_235	___eu626069.1__gi:186909911_ ;k__fungi;p__basidiomycota;c__tremellomycetes;o__filobasidiales;f__filobasidiales;g__cryptococcus;s__cryptococcus sp.;superkingdom__eukaryota;subkingdom__dikarya	0.0374139	0.0149804	0.0319123	0.017334	0.00460306	0.0121813	0.0248381	0.00882885	0.00152971	0	0	0.0012515	0.00843939	0.00732047	0.00767651	0	0.0026433	0	0.0113005	0.0342711	0.00586321	0.00163327	0.00113487	0	0	0	0.00878272	0	0.00863049	0.0141093	0.0215817	0.00860141	0.0115404	0.0111336	0.0472036	0	0.0207966	0.0469076	0.00842247	0.00116054	0	0	0	0.0309876	0.0193199	0.0196027	0.0363769	0.00152828
OTU_237	___ay667486.1__gi:50313401_ ;k__fungi;p__ascomycota;c__sordariomycetes;o__hypocreales;f__nectriaceae;g__fusarium;s__fusarium oxysporum;subclass hypocreomycetidae;subphylum__pezizomycotina;subkingdom__dikarya;superkingdom__eukaryota	0.00724139	0.0131079	0.00750878	0.00495258	0.00153435	0.00270695	0.00827938	0.00735738	0.00764853	0.0192282	0.00665306	0.010012	0.0101273	0.0122008	0.00575738	0.0397324	0.0132165	0.0338096	0.00968617	0.0109044	0.00293161	0.0024499	0.00907894	0.00070278	0.0126438	0.0115185	0.00526963	0.0717753	0.00143841	0.00352734	0.00980988	0.00860141	0.0138485	0.00954305	0	0	0.04908	0.0117269	0.00280749	0.00116054	0.00193442	0	0.00274557	0.00619751	0.00241499	0.0130685	0.0103934	0.0122262
OTU_238	___dq485685.1__gi:94995537_ ;k__fungi;p__chytridiomycota;c__chytridiomycetes;o__rhizophydiales;f__rhizophydiaceae;g__rhizophydium;s__rhizophydium sp.;superkingdom__eukaryota	0	0.00749022	0.076965	0	0	0.00135347	0.00331175	0.0058859	0.00458912	0	0	0.0012515	0	0.00244016	0	0	0.00132165	0	0	0.00311556	0.0014658	0	0	0	0	0.00987297	0	0	0	0	0	0.00286714	0	0	0	0	0.00249559	0	0	0	0	0	0.00274557	0	0	0	0	0
OTU_239	___am901704.1__gi:163257639_ ;k__fungi;p__basidiomycota;c__microbotryomycetes;o__sporidiobolales;f__sporidiobolales;g__rhodotorula;s__rhodotorula sp.;superkingdom__eukaryota;subkingdom__dikarya;subphylum__pucciniomycotina	0.0012069	0	0.00563158	0.0123814	0.0184123	0.0216556	0	0.00147148	0.00152971	0.0192282	0.00887075	0.400481	0.00337576	0.00488031	0	0.0143037	0.00660825	0.0400706	0.00322872	0.00467333	0.0014658	0.0146994	0.0907894	0.112445	0.00090313	0.00329099	0	0.00188882	0.00863049	0.0599647	0	0	0	0.00795254	0.00651084	0.0124679	0.00166373	0.00234538	0	0	0.013541	0.00270845	0	0	0	0	0	0
OTU_241	___eu784378.1__gi:209870902_ ;k__fungi;p__basidiomycota;c__agaricomycetes;o__boletales;f__boletaceae;g__octaviania;s__octaviania asterosperma;subgenus octaviania;subfamily__leccinoideae;suborder__boletineae;subclass agaricomycetidae;subkingdom__dikarya;superkingdom__eukaryota	0.0313794	0.0486864	0.067579	0	0.00920613	0.00812084	0.0198705	0.00147148	0.0336536	0	0.00221769	0	0	0.0244016	0.0287869	0.00158929	0.0026433	0.00125221	0.0161436	0.0124622	0.0234528	0	0	0.00070278	0.0361252	0.013164	0.0158089	0	0.0201378	0.00352734	0.00392395	0.00573427	0.00923233	0.00318102	0.00488313	0.00935089	0.00332745	0.00234538	0.0168449	0	0	0	0.0128127	0.044932	0.0482998	0.00435616	0.0207868	0.0366787
OTU_242	___hq649988.1__gi:317184231_ ;k__fungi;p__ascomycota;c__sordariomycetes;o__hypocreales;f__hypocreales;g__emericellopsis;s__emericellopsis sp.;superkingdom__eukaryota;subkingdom__dikarya;subphylum__pezizomycotina;subclass hypocreomycetidae	0	0	0	0	0	0	0.00165588	0	0	0	0	0	0	0.0219614	0	0	0.00132165	0	0.0145293	0	0	0	0	0	0.00361252	0.00493648	0	0	0	0	0	0	0.00461617	0.00636203	0.00325542	0	0.00166373	0.00234538	0	0	0.00193442	0	0.00549114	0	0.00482998	0.00871232	0	0.00458484
OTU_244	___gu187526.1__gi:300394330_ ;k__fungi;p__basidiomycota;c__agaricomycetes;o__atheliales;f__atheliaceae;g__cristinia;s__cristinia sp.;subclass agaricomycetidae;subkingdom__dikarya;superkingdom__eukaryota	0	0	0	0	0	0	0	0	0.00152971	0	0	0	0	0	0	0	0	0	0	0	0	0	0	0	0	0	0	0	0	0	0	0	0	0	0.00325542	0	0.00332745	0	0.00561498	0	0	0	0.000915189	0.00154938	0	0.00217808	0.00173223	0.00152828
OTU_245	___dq248314.1__gi:82504131_ ;k__fungi;p__ascomycota;c__xylonomycetes;o__xylonomycetales;f__xylonomycetales;g__symbiotaphrina;s__symbiotaphrina kochii;superkingdom__eukaryota;subkingdom__dikarya;subphylum__pezizomycotina	0.00965519	0.0112353	0.0244035	0.00247629	0.00460306	0	0.0182146	0.0176577	0.0229456	0	0.00221769	0	0.0253182	0.00976062	0.00383826	0	0	0	0.00161436	0.00623111	0.0117264	0	0	0.00070278	0.00361252	0.0164549	0.00526963	0	0.00575366	0.00881834	0.00588593	0.0315385	0	0.0206766	0.0130217	0	0.00748677	0.00234538	0	0	0	0	0.0155582	0.0356357	0.0217349	0	0.00866116	0.00611312
OTU_246	___ab032675.1__gi:7262469_ ;k__fungi;p__basidiomycota;c__tremellomycetes;o__filobasidiales;f__filobasidiales;g__cryptococcus;s__cryptococcus fuscescens;superkingdom__eukaryota;subkingdom__dikarya	0.0181035	0.0243432	0.00563158	0.00247629	0.00613742	0.0148882	0.039741	0.00735738	0.0275347	0.00452427	0.00443538	0.00375451	0.00168788	0.00488031	0.0287869	0.00158929	0.0105732	0.00250441	0.0129149	0.0109044	0.00879482	0.000816633	0.00453947	0.00210834	0.0234814	0.0164549	0.0263481	0.00377765	0.00575366	0.0176367	0.0137338	0.00860141	0.0184647	0.00954305	0.00488313	0.00155848	0.0091505	0.0281446	0.01123	0	0	0	0.00915189	0.00309876	0.00724498	0.00653424	0.0138579	0.010698
OTU_247	___ay999136.1__gi:67644111_ ;k__fungi;p__ascomycota;c__sordariomycetes;o__sordariales;f__lasiosphaeriaceae;g__cercophora;s__cercophora coprophila;subclass sordariomycetidae;subphylum__pezizomycotina;subkingdom__dikarya;superkingdom__eukaryota	0.0253449	0.0655394	0.00563158	0	0	0.00541389	0.0198705	0.213364	0.00152971	0	0.00110884	0	0	0	0.00191913	0	0.026433	0.00375662	0.00484308	0	0.00439741	0.00163327	0.00113487	0	0.172498	0.00658198	0.0122958	0.00188882	0.0258915	0.00881834	0.00588593	0.00860141	0	0.00318102	0.0374373	0.00155848	0.0865138	0.0117269	0.00842247	0	0.00386885	0.0054169	0.00183038	0	0.0338099	0	0.00692893	0.0076414
OTU_249	___eu414289.1__gi:172055337_ ;k__fungi;p__basidiomycota;c__agaricomycetes;o__boletales;f__boletaceae;g__octaviania;s__octaviania sp.;subfamily__leccinoideae;suborder__boletineae;subclass agaricomycetidae;subkingdom__dikarya;superkingdom__eukaryota	0.0844829	0.0205981	0.129526	0.00247629	0.00153435	0.00541389	0	0	0.0244753	0	0.00332653	0.002503	0.00337576	0.00244016	0.0230295	0.00158929	0.00132165	0.00125221	0.00484308	0.00155778	0.00439741	0.000816633	0.00453947	0	0.0153532	0	0	0	0.0215762	0	0.0412015	0.0114685	0.00230808	0	0.00162771	0	0.0174691	0.0351807	0.01123	0	0	0	0.00274557	0	0.0482998	0.00871232	0.00173223	0.00458484
OTU_250	___dq386306.1__gi:88043714_ ;k__fungi;p__basidiomycota;c__microbotryomycetes;o__sporidiobolales;f__sporidiobolales;g__rhodotorula;s__rhodotorula mucilaginosa;superkingdom__eukaryota;subkingdom__dikarya;subphylum__pucciniomycotina	0	0.00187255	0.00187719	0	0.00153435	0.00270695	0	0	0	0	0.00554422	0.00500601	0.00168788	0	0	0	0.0026433	0.0137743	0	0.00467333	0.0014658	0.0130661	0.00113487	0.0154612	0.00090313	0	0.00175654	0	0	0.111111	0	0	0.00230808	0.00159051	0.00325542	0.0233772	0.0249559	0.00234538	0.00280749	0.0499031	0.872425	0.00270845	0	0	0	0	0	0
OTU_251	___hq607991.1__gi:312434469_ ;k__fungi;p__ascomycota;c__dothideomycetes;o__pleosporales;f__pleosporaceae;g__curvularia;s__cochliobolus lunatus;suborder__pleosporineae;subclass pleosporomycetidae;subphylum__pezizomycotina;subkingdom__dikarya;superkingdom__eukaryota	0.0156897	0	0.00563158	0.017334	0.0122748	0.0216556	0.0198705	0.00147148	0.00305941	0.00678641	0.00110884	0.0137665	0.0101273	0	0.00191913	0.027018	0.0052866	0.00125221	0	0	0	0.000816633	0.00113487	0.00070278	0.0153532	0.00822747	0.0228351	0.00188882	0.00431524	0	0	0	0	0.00159051	0	0	0.0133098	0.00234538	0	0	0	0	0.0118975	0.00464814	0	0.00871232	0	0.0229242
OTU_252	fungal sp. ksl3 ;k__fungi;p__cryptomycota;c__cryptomycota;o__cryptomycota;f__cryptomycota;g__paramicrosporidium;s__fungal sp.;superkingdom__eukaryota	0.0289656	0.0299609	0.0244035	0	0	0.00406042	0.0712027	0.00147148	0	0	0.00221769	0	0.0151909	0.0219614	0.0230295	0	0.0026433	0	0	0.0218089	0.0131922	0.000816633	0.00907894	0.00070278	0.00812817	0	0.00878272	0	0.00143841	0.0123457	0	0.0143357	0.00230808	0.0206766	0.0292988	0	0.000831864	0.0117269	0.0140375	0.00116054	0	0	0.0576569	0	0.00241499	0.00871232	0.00519669	0
OTU_253	___gu566275.1__gi:291498463_ ;k__fungi;p__fungi;c__mucoromycotina;o__mucorales;f__mucoraceae;g__mucor;s__mucor fragilis;superkingdom__eukaryota;subphylum__mucoromycotina;suborder__mucorineae	0.0024138	0	0	0.00495258	0.0107405	0.0203021	0	0.00147148	0.00152971	0.297471	0.0742926	0.156438	0.00337576	0.00244016	0	0.0683397	0.0436144	0.0150265	0.00161436	0.00155778	0.00293161	0.0187826	0.0124835	0.0245973	0.00090313	0	0	0.00188882	0.191309	0.00705467	0.00392395	0	0	0.0159051	0.00651084	0.0685732	0.000831864	0	0	0.00116054	0.00773769	0.0176049	0	0	0	0	0	0
OTU_254	thelebolus globosus ;k__fungi;p__ascomycota;c__leotiomycetes;o__thelebolales;f__thelebolaceae;g__thelebolus;s__thelebolus globosus;subphylum__pezizomycotina;subkingdom__dikarya;superkingdom__eukaryota	0	0.00187255	0.00187719	0.0569547	0.0659772	0.192193	0	0.00294295	0.00152971	0	0.0155238	0.0012515	0	0.00244016	0	0	0.00132165	0.0125221	0	0.00155778	0.0014658	0	0.00226974	0.00773058	0.00270939	0.00329099	0	0.00377765	0.00431524	0.021164	0	0.00286714	0	0.00954305	0.0146494	0	0.00166373	0	0	0	0.0831802	0.387308	0	0	0	0.00217808	0	0
OTU_255	___fn428921.1__gi:297373260_ ;k__fungi;p__basidiomycota;c__tremellomycetes;o__tremellales;f__tremellales;g__cryptococcus;s__cryptococcus laurentii;superkingdom__eukaryota;subkingdom__dikarya	0	0.00561766	0.00750878	0.0668598	0.00306871	0.00676737	0.0066235	0.00147148	0.00611883	0.00791748	0.00443538	0	0.00168788	0	0	0	0	0.00375662	0	0	0.0014658	0	0.00453947	0.0119473	0.020772	0.00493648	0.00175654	0.00188882	0.00143841	0.00176367	0	0	0	0.0111336	0.0292988	0	0	0.00703614	0	0.0371372	0.0348196	0	0.00732152	0	0	0	0	0.00152828
OTU_257	___ef197068.1__gi:145968391_ ;k__fungi;p__ascomycota;c__sordariomycetes;o__sordariales;f__lasiosphaeriaceae;g__cercophora;s__cercophora coronata;subclass sordariomycetidae;subphylum__pezizomycotina;subkingdom__dikarya;superkingdom__eukaryota	0	0	0.0300351	0	0	0	0.00496763	0	0.00611883	0.00113107	0	0.002503	0	0.0244016	0	0.00158929	0.00132165	0.00375662	0	0	0	0.00163327	0	0.00140556	0.00090313	0	0.00351309	0.89908	0.00143841	0.00176367	0	0.00286714	0.00230808	0.00159051	0	0.00623393	0	0.0117269	0.00280749	0.00232107	0	0.00135422	0.00732152	0.00464814	0	0	0	0
OTU_258	___ay154943.1__gi:32394929_ ;k__fungi;p__ascomycota;c__sordariomycetes;o__hypocreales;f__hypocreaceae;g__trichoderma;s__trichoderma sp.;subclass hypocreomycetidae;subphylum__pezizomycotina;subkingdom__dikarya;superkingdom__eukaryota	0.0012069	0.00936277	0.0150176	0	0	0.00270695	0.0182146	0.0058859	0.00305941	0	0.00110884	0.00375451	0.013503	0.0219614	0.0249487	0	0.00660825	0	0.00322872	0.00778889	0	0	0.00113487	0	0.0189657	0.00658198	0.196733	0	0.00143841	0	0.00392395	0.0143357	0.0300051	0.0127241	0.0211602	0.0514299	0.00998236	0.018763	0.00561498	0.00116054	0.00193442	0	0.0155582	0.00774689	0.00241499	0.0196027	0.00692893	0.00305656
OTU_259	___aj246158.1__gi:5420316_ ;k__fungi;p__ascomycota;c__sordariomycetes;o__microascales;f__halosphaeriaceae;g__periconia;s__periconia macrospinosa;subclass hypocreomycetidae;subphylum__pezizomycotina;subkingdom__dikarya;superkingdom__eukaryota	0.0036207	0.00936277	0.0168947	0.00247629	0.00306871	0.00541389	0.00165588	0	0	0	0	0	0.0118151	0	0.00575738	0	0	0	0.00322872	0.00311556	0.00879482	0	0	0	0.0171595	0	0.0210785	0	0.00287683	0.00176367	0.0196198	0	0.027697	0.0143146	0.00162771	0.0124679	0.000831864	0.0234538	0.00280749	0	0	0	0.00640633	0.0201419	0.00241499	0.0196027	0.00346446	0.00305656
OTU_260	___hq179669.1__gi:321496046_ ;k__fungi;p__basidiomycota;c__agaricomycetes;o__agaricales;f__agaricaceae;g__cercopemyces;s__cystoderma ponderosum;subclass agaricomycetidae;subkingdom__dikarya;superkingdom__eukaryota	0.0325863	0.00936277	0	0	0	0.00812084	0	0.00294295	0	0.00452427	0	0	0	0.0146409	0	0.00158929	0.00660825	0.00125221	0.00161436	0.00155778	0.0014658	0	0.00113487	0	0	0	0	0	0.00143841	0.00176367	0.00196198	0.0114685	0.00923233	0.0254481	0	0	0.036602	0	0.00280749	0	0	0	0.129042	0.00309876	0.00482998	0	0	0.00152828
OTU_261	___hq888728.1__gi:321173747_ ;k__fungi;p__blastocladiomycota;c__blastocladiomycetes;o__blastocladiales;f__blastocladiaceae;g__allomyces;s__allomyces moniliformis;superkingdom__eukaryota	0.0036207	0	0.00187719	0.00742887	0.00306871	0	0	0.0058859	0.00305941	0.00113107	0.00110884	0	0	0.00244016	0.00191913	0.00158929	0	0.00250441	0	0.00467333	0.0014658	0	0.00226974	0.00140556	0.0090313	0.00164549	0	0.00188882	0.00575366	0	0	0.00573427	0.00461617	0.00795254	0.864314	0.00935089	0.00332745	0.00234538	0.00842247	0	0	0.00135422	0	0	0	0	0	0.00152828
OTU_262	exophiala sp. nh512 ;k__fungi;p__ascomycota;c__eurotiomycetes;o__chaetothyriales;f__herpotrichiellaceae;g__exophiala;s__exophiala sp.;subclass chaetothyriomycetidae;subphylum__pezizomycotina;subkingdom__dikarya;superkingdom__eukaryota	0.0398277	0.0355785	0.103246	0.017334	0.0184123	0.0148882	0.101008	0.0559161	0.0229456	0.00452427	0.00776191	0.00500601	0.0118151	0.0244016	0.059493	0.00476788	0.0079299	0.00500883	0.0322872	0.0436178	0.0659611	0.00326653	0.0136184	0.00070278	0.0298033	0.0625288	1.33146	0.00566647	0.017261	0.0405644	0.0215817	0.0917484	0.0438536	0.0143146	0.190442	0.00467545	0.0449206	0.103197	0.0252674	0	0.00193442	0	0.0100671	0.0108457	0.0265649	0.028315	0.0155901	0.00916969
OTU_263	___jf439467.1__gi:328923717_ ;k__fungi;p__ascomycota;c__sordariomycetes;o__sordariales;f__chaetomiaceae;g__chaetomium;s__chaetomium nigricolor;subclass sordariomycetidae;subphylum__pezizomycotina;subkingdom__dikarya;superkingdom__eukaryota	0	0	0	0	0	0	0	0	0	0	0	0	0	0	0	0	0	0	0	0	0	0	0	0	0	0	0	0	0	0	0	0	0	0	0	0	0	0	0	0	0.00580327	0	0.00183038	0	0	0	0.00173223	0
OTU_264	___ab099511.1__gi:27544139_ ;k__fungi;p__ascomycota;c__sordariomycetes;o__hypocreales;f__clavicipitaceae;g__paecilomyces;s__paecilomyces marquandii;subclass hypocreomycetidae;subphylum__pezizomycotina;subkingdom__dikarya;superkingdom__eukaryota	0.0168966	0.0149804	0.0112632	0.017334	0.00306871	0	0.00496763	0.0117718	0.0183565	0.0033932	0.00110884	0	0.0236303	0.0122008	0.00383826	0	0.00132165	0	0.0193723	0.0249244	0.00439741	0	0.0034046	0	0.00632191	0.00822747	0.0175654	0	0.00719207	0.00176367	0.00588593	0.0114685	0.00461617	0.00795254	0	0.0109094	0.0158054	0.00938152	0.00842247	0	0	0	0.019219	0.012395	0.00482998	0.0174246	0.00519669	0.00611312
OTU_265	___ay188374.1__gi:28826190_ ;k__fungi;p__basidiomycota;c__ustilaginomycetes;o__ustilaginales;f__ustilaginaceae;g__sporisorium;s__sporisorium sp.;subphylum__ustilaginomycotina;subkingdom__dikarya;superkingdom__eukaryota	0	0	0	0	0	0	0	0	0	0	0	0	0	0	0	0	0	0	0	0	0	0	0	0	0	0	0	0	0	0	0	0	0	0	0	0	0	0	0	0	0	0	0	0	0	0	0	0
OTU_266	yunnania penicillata ;k__fungi;p__ascomycota;c__sordariomycetes;o__microascales;f__microascaceae;g__yunnania;s__yunnania penicillata;subclass hypocreomycetidae;subphylum__pezizomycotina;subkingdom__dikarya;superkingdom__eukaryota	0	0.00749022	0	0	0.0153435	0	0	0.0103003	0	0	0	0	0	0.00488031	0.00959564	0	0	0	0	0	0	0	0	0	0	0	0.0210785	0	0	0	0	0	0	0	0	0	0.00166373	0	0	0	0	0	0.000915189	0.00619751	0	0.00217808	0	0.00458484
OTU_267	___jf439111.1__gi:344165555_ ;k__fungi;p__glomeromycota;c__glomeromycetes;o__glomerales;f__glomeraceae;g__glomus;s__glomus sp.;superkingdom__eukaryota	0.00724139	0.00374511	0.0206491	0	0.00153435	0	0.00331175	0.0058859	0.00917824	0	0.00443538	0.0012515	0.0118151	0	0.00383826	0	0.00132165	0	0.0435878	0.0171356	0.0190554	0	0	0	0.0180626	0.0181004	0.00878272	0.00188882	0.00287683	0	0.00784791	0.0114685	0	0.0190861	0	0	0.00332745	0	0	0.00116054	0	0	0	0.0170432	0.00965997	0.00435616	0	0.0229242
OTU_269	conlarium duplumascospora ;k__fungi;p__ascomycota;c__sordariomycetes;o__sordariomycetidae;f__annulatascaceae;g__conlarium;s__conlarium duplumascospora;superkingdom__eukaryota;subkingdom__dikarya;subphylum__pezizomycotina;subclass sordariomycetidae	0.0181035	0.0112353	0	0.00495258	0	0.00270695	0.00165588	0.0058859	0.0168268	0.00113107	0	0.0012515	0.0472606	0.0414826	0.00575738	0	0.00132165	0.00125221	0.00645745	0.0186933	0.00586321	0	0.00113487	0	0.00632191	0.0197459	0.00878272	0.00377765	0.00431524	0.00529101	0.00588593	0.00286714	0.0161566	0.00318102	0.00976626	0	0.00748677	0.00234538	0.00842247	0	0	0	0.0567417	0.0139444	0	0.00653424	0.0173223	0
OTU_270	___aj301976.1__gi:17426677_ ;k__fungi;p__ascomycota;c__sordariomycetes;o__glomerellales;f__glomerellaceae;g__colletotrichum;s__colletotrichum truncatum;subclass hypocreomycetidae;subphylum__pezizomycotina;subkingdom__dikarya;superkingdom__eukaryota	0	0.0224706	0.0150176	0.00247629	0.00153435	0	0.00496763	0.00147148	0.0107079	0.00113107	0	0.002503	0.00168788	0.00732047	0	0	0	0	0	0.0109044	0	0	0.00113487	0	0	0	0	0.0339988	0	0	0	0	0.00230808	0	0	0	0.00998236	0.00938152	0.227407	0	0	0	0	0.00154938	0	0.0304931	0.00346446	0
OTU_271	___jf908564.1__gi:344333521_ ;k__fungi;p__ascomycota;c__pezizomycetes;o__pezizales;f__pezizaceae;g__peziza;s__peziza pseudoviolacea;subphylum__pezizomycotina;subkingdom__dikarya;superkingdom__eukaryota	0.0024138	0	0.00187719	0	0.00153435	0.00135347	0	0	0.00152971	0	0.00332653	0.0012515	0	0.0244016	0	0	0	0	0.0129149	0	0.45733	0.000816633	0	0	0	0	0	0.0075553	0	0.00176367	0	0	0	0.00159051	0	0	0	0	0	0	0	0	0.000915189	0.00774689	0.398474	0.00217808	0	0.00916969
OTU_272	___eu626069.1__gi:186909911_ ;k__fungi;p__basidiomycota;c__tremellomycetes;o__filobasidiales;f__filobasidiales;g__cryptococcus;s__cryptococcus sp.;superkingdom__eukaryota;subkingdom__dikarya	0.00965519	0.00936277	0.0300351	0.00742887	0.00613742	0.00270695	0.0165588	0.0161862	0.0183565	0	0.00443538	0.0012515	0.00337576	0.00976062	0.0134339	0.00317859	0.0052866	0.00125221	0.0371303	0.0249244	0.00732901	0	0.0034046	0	0.00361252	0.00164549	0.00175654	0	0.0115073	0.021164	0.00196198	0.00573427	0	0.00636203	0.00325542	0.00311696	0.0116461	0.018763	0.0168449	0	0	0	0.014643	0.00619751	0.0289799	0.0152466	0.0138579	0.00152828
OTU_274	___gu187526.1__gi:300394330_ ;k__fungi;p__basidiomycota;c__agaricomycetes;o__atheliales;f__atheliaceae;g__cristinia;s__cristinia sp.;subclass agaricomycetidae;subkingdom__dikarya;superkingdom__eukaryota	0	0	0	0	0	0	0	0.00147148	0	0	0.00110884	0	0	0.00244016	0	0	0.00132165	0	0	0	0	0	0	0	0	0	0	0	0	0	0	0	0	0	0.00162771	0	0.00166373	0	0.01123	0	0	0	0.000915189	0	0	0.0108904	0.00173223	0
OTU_275	ramaria suecica ;k__fungi;p__basidiomycota;c__agaricomycetes;o__gomphales;f__gomphaceae;g__ramaria;s__ramaria suecica;subclass phallomycetidae;subkingdom__dikarya;superkingdom__eukaryota	0.0289656	0.0149804	0.0206491	0	0.00613742	0.00270695	0.0430528	0.0294295	0.00152971	0	0	0	0.027006	0.0170811	0.00767651	0.00158929	0.0026433	0	0.00968617	0.0342711	0.0014658	0	0	0.00140556	0.0162563	0.0115185	0.00702617	0	0.00575366	0.00352734	0.00196198	0.0172028	0.00461617	0	0.00325542	0.00935089	0.00166373	0.00469076	0.00842247	0	0	0	0.0320316	0.0309876	0.01449	0.00653424	0.00173223	0.00916969
OTU_276	___hq607852.1__gi:312434331_ ;k__fungi;p__ascomycota;c__eurotiomycetes;o__chaetothyriales;f__herpotrichiellaceae;g__exophiala;s__exophiala sp.;subclass chaetothyriomycetidae;subphylum__pezizomycotina;subkingdom__dikarya;superkingdom__eukaryota	0.0156897	0.0149804	0.0244035	0	0	0.00135347	0.0115911	0	0.0275347	0	0	0.0012515	0.0151909	0.0195212	0.00383826	0.00158929	0.0079299	0.00250441	0.00807181	0.00623111	0.021987	0.000816633	0.00226974	0	0.0117407	0.00493648	0.0122958	0	0	0.00176367	0.0353156	0.00573427	0.0161566	0	0.00162771	0	0.00998236	0.00469076	0.00842247	0	0	0	0.0164734	0.012395	0.00482998	0.00217808	0.00692893	0.0137545
OTU_277	___hq542921.1__gi:353741788_ ;k__fungi;p__fungi;c__kickxellomycotina;o__kickxellales;f__kickxellaceae;g__ramicandelaber;s__ramicandelaber longisporus;superkingdom__eukaryota;subphylum__kickxellomycotina	0.0337932	0.0224706	0.0206491	0.0148577	0.00306871	0.00406042	0.0165588	0.0250151	0.0183565	0	0.00221769	0.002503	0.0168788	0.0146409	0.0441399	0	0.0026433	0.00375662	0.0242154	0.0186933	0.0234528	0	0	0	0.0451565	0.00329099	0.00526963	0.00188882	0	0	0.0470874	0.0286714	0.0115404	0	0	0	0.0207966	0	0.00842247	0	0	0	0.0155582	0.00309876	0	0.0130685	0	0.0229242
OTU_278	___dq233665.1__gi:78173100_ ;k__fungi;p__ascomycota;c__dothideomycetes;o__botryosphaeriales;f__botryosphaeriaceae;g__macrophomina;s__macrophomina phaseolina;subphylum__pezizomycotina;subkingdom__dikarya;superkingdom__eukaryota	0.0301725	0.0131079	0.00187719	0.017334	0.0122748	0.00812084	0.0165588	0.0294295	0.0351833	0.00113107	0.00443538	0.0112635	0	0.0219614	0.0211104	0.0301966	0.00132165	0.00250441	0.00161436	0.01402	0.00293161	0.00163327	0.00113487	0.00070278	0	0.0263279	0	0.00188882	0	0.00352734	0.00196198	0	0.027697	0	0	0	0.00332745	0	0.00842247	0	0.00193442	0	0	0.0139444	0	0.00435616	0.00692893	0.0137545
OTU_279	___af097911.1__gi:5106872_ ;k__fungi;p__ascomycota;c__sordariomycetes;o__hypocreales;f__hypocreaceae;g__trichoderma;s__trichoderma stromaticum;subclass hypocreomycetidae;subphylum__pezizomycotina;subkingdom__dikarya;superkingdom__eukaryota	0.00724139	0.00374511	0.00375439	0.00247629	0.00306871	0.00270695	0.00827938	0.0132433	0.00764853	0.00678641	0.00221769	0.00375451	0.00168788	0.00732047	0.0287869	0.00317859	0.00132165	0.00375662	0.0161436	0.01402	0.014658	0.00163327	0.00113487	0	0.00361252	0.0296189	0.0263481	0	0.00287683	0.00352734	0.00980988	0.00573427	0.0115404	0.00159051	0	0.00155848	0.00582305	0.00703614	0.00842247	0.00116054	0	0	0.00457595	0.0108457	0	0.00435616	0.0138579	0.00916969
OTU_280	___hq435667.1__gi:315940061_ ;k__fungi;p__ascomycota;c__sordariomycetes;o__sordariales;f__chaetomiaceae;g__thielavia;s__thielavia sp.;subclass sordariomycetidae;subphylum__pezizomycotina;subkingdom__dikarya;superkingdom__eukaryota	0.0024138	0.0112353	0.00750878	0	0.00153435	0	0.0066235	0	0.00305941	0.00904855	0.00110884	0	0.00506363	0.00244016	0	0.00317859	0.00396495	0.00250441	0	0.00467333	0.00732901	0.000816633	0.0034046	0	0.00090313	0	0.00175654	0.551537	0.00143841	0.00176367	0.00588593	0	0.0207727	0.0111336	0.00162771	0.00155848	0	0.00703614	0.00280749	0	0.00386885	0	0.0082367	0.00774689	0.00965997	0.0217808	0.00519669	0.00152828
OTU_281	___hq542914.1__gi:353741781_ ;k__fungi;p__fungi;c__kickxellomycotina;o__kickxellales;f__kickxellaceae;g__ramicandelaber;s__ramicandelaber sp.;superkingdom__eukaryota;subphylum__kickxellomycotina	0.0036207	0.0280883	0.0150176	0.0123814	0.0199466	0.0135347	0.0165588	0.0353154	0.0183565	0	0.00554422	0	0.00168788	0.122008	0.0383826	0	0.00132165	0.00125221	0	0.0155778	0.0483715	0	0.00794407	0	0.0812817	0.00987297	0.019322	0.00188882	0.0129457	0.00176367	0.00784791	0.0573427	0.027697	0	0.00325542	0	0.0149735	0.00469076	0	0	0	0	0.033862	0	0	0	0	0.0137545
OTU_282	___jn207261.1__gi:346654862_ ;k__fungi;p__ascomycota;c__dothideomycetes;o__pleosporales;f__didymellaceae;g__phoma;s__phoma sp.;suborder__pleosporineae;subclass pleosporomycetidae;subphylum__pezizomycotina;subkingdom__dikarya;superkingdom__eukaryota	0.0012069	0	0	0.0792413	0.0276184	0.0730875	0.00331175	0	0	0.00904855	0.0266123	0.022527	0	0.0805251	0.00575738	0.00635718	0	0.00125221	0.00161436	0.00311556	0.0117264	0.0024499	0.00113487	0.0035139	0.00451565	0.00493648	0	0.00944412	0	0	0.172654	0	0	0.00159051	0	0.00155848	0.000831864	0.0328353	0.00842247	0	0.00193442	0.00135422	0	0	0	0.00653424	0	0
OTU_283	___ay587135.1__gi:51093228_ ;k__fungi;p__ascomycota;c__dothideomycetes;o__pleosporales;f__leptosphaeriaceae;g__sphaerellopsis;s__eudarluca caricis;suborder__pleosporineae;subclass pleosporomycetidae;subphylum__pezizomycotina;subkingdom__dikarya;superkingdom__eukaryota	0	0	0	0.85432	0.0935956	0.0717341	0	0.00147148	0	0.00113107	0.00332653	0.002503	0	0	0	0	0.00132165	0.00375662	0.00322872	0	0.0014658	0.000816633	0	0.00140556	0	0.00164549	0.00175654	0	0	0	0.00196198	0	0	0	0	0	0	0.00234538	0	0	0	0	0	0	0	0	0	0
OTU_284	___hq630992.1__gi:317383313_ ;k__fungi;p__ascomycota;c__dothideomycetes;o__pleosporales;f__phaeosphaeriaceae;g__phaeosphaeria;s__phaeosphaeria sp.;suborder__pleosporineae;subclass pleosporomycetidae;subphylum__pezizomycotina;subkingdom__dikarya;superkingdom__eukaryota	0.0265518	0.60858	0.00375439	0.00495258	0.00767177	0.00135347	0.00331175	0.00147148	0	0	0.00554422	0.002503	0	0	0	0.00794647	0	0.00125221	0.00161436	0.0109044	0.00439741	0.0024499	0	0.00070278	0.00090313	0.00164549	0.00526963	0.0075553	0.00287683	0.010582	0	0.00286714	0	0	0.00162771	0	0.000831864	0	0	0	0	0.00270845	0	0	0	0.00435616	0	0.00305656
OTU_285	___dq445907.1__gi:90761993_ ;k__fungi;p__basidiomycota;c__pucciniomycetes;o__pucciniales;f__pucciniastraceae;g__pucciniastrum;s__pucciniastrum epilobii;subphylum__pucciniomycotina;subkingdom__dikarya;superkingdom__eukaryota	0.0144828	0.0112353	0.0112632	0.00495258	0.00920613	0.00541389	0.00827938	0.0323725	0.036713	0.00791748	0.00221769	0	0	0	0.00575738	0.00158929	0.00132165	0.00125221	0.00968617	0.00467333	0	0.000816633	0	0.00070278	0.0180626	0.0115185	0	0	0.00719207	0.00529101	0	0.0143357	0.0207727	0	0.00651084	0	0.00249559	0.0234538	0.01123	0.00116054	0	0	0.0228797	0.0340863	0.012075	0.00871232	0.00346446	0.00152828
OTU_286	___eu040232.1__gi:157287137_ ;k__fungi;p__ascomycota;c__leotiomycetes;o__helotiales;f__helotiales;g__hyalodendriella;s__hyalodendriella betulae;superkingdom__eukaryota;subkingdom__dikarya;subphylum__pezizomycotina	0.00844829	0.00187255	0.00938597	0.00247629	0.00767177	0.00270695	0.00993526	0.00294295	0.0290644	0	0.00110884	0.00375451	0.0506363	0.00732047	0.00191913	0	0.00396495	0	0.00484308	0.00467333	0.00586321	0.000816633	0.00226974	0.00070278	0.00270939	0	0.00175654	0	0.0143841	0.00529101	0.00588593	0.00286714	0.0138485	0.00795254	0.0162771	0	0.00249559	0.0164177	0.00561498	0.00116054	0.00193442	0	0.00640633	0.00619751	0.012075	0.00871232	0.00692893	0.0137545
OTU_287	mortierella sp. 11ma04 ;k__fungi;p__fungi;c__mortierellomycotina;o__mortierellales;f__mortierellaceae;g__mortierella;s__mortierella sp.;superkingdom__eukaryota;subphylum__mortierellomycotina	0.012069	0.0131079	0.0168947	0.00990516	0.00767177	0.0108278	0.0066235	0.0117718	0.0198862	0.00226214	0.00665306	0.00625751	0.0202545	0.0195212	0.00575738	0.027018	0.0052866	0.00125221	0.0193723	0.0311556	0.014658	0.0024499	0.0034046	0	0.0162563	0.00658198	0.0122958	0.0075553	0.00575366	0.0141093	0.00980988	0.00860141	0.0115404	0.00795254	0.00813855	0.0124679	0.0191329	0.00469076	0.00842247	0	0.00386885	0	0.014643	0.00929627	0	0.00653424	0.0103934	0.0122262
OTU_288	___ay646226.1__gi:50080680_ ;k__fungi;p__ascomycota;c__dothideomycetes;o__pleosporales;f__didymellaceae;g__phoma;s__phoma sp.;suborder__pleosporineae;subclass pleosporomycetidae;subphylum__pezizomycotina;subkingdom__dikarya;superkingdom__eukaryota	0	0	0.00375439	0	0	0.00541389	0.00331175	0	0.00611883	0.00113107	0	0	0.00168788	0	0.00191913	0	0	0.00125221	0.040359	0	0	0	0	0	0.00361252	0	0	0.00377765	0.0431524	0	0.00980988	0	0.0369293	0.00318102	0.00162771	0	0.00582305	0.0257992	0	0	0	0	0	0.0108457	0	0	0	0
OTU_290	___af462638.1__gi:18389970_ ;k__fungi;p__basidiomycota;c__agaricomycetes;o__agaricales;f__tricholomataceae;g__tricholoma;s__tricholoma focale;subclass agaricomycetidae;subkingdom__dikarya;superkingdom__eukaryota	0	0	0	0	0	0	0	0	0	0	0	0	0	0	0	0	0	0	0	0	0	0	0	0	0	0	0	0	0	0	0	0	0	0	0	0	0	0	0	0	0	0	0.000915189	0	0	0	0	0
OTU_291	___eu926251.1__gi:219963326_ ;k__fungi;p__ascomycota;c__sordariomycetes;o__hypocreales;f__nectriaceae;g__fusarium;s__fusarium biseptatum;subclass hypocreomycetidae;subphylum__pezizomycotina;subkingdom__dikarya;superkingdom__eukaryota	0.0036207	0.00187255	0.00187719	0.00247629	0.00306871	0.00812084	0.00165588	0.092703	0.00917824	0.00226214	0.00332653	0.0112635	0.0253182	0.0122008	0	0.00476788	0.0052866	0.00125221	0.00968617	0	0	0.00653307	0.0113487	0.00070278	0.00722504	0	0	0.00188882	0	0.0123457	0	0	0	0.00159051	0	0.00155848	0.000831864	0.00703614	0.00280749	0	0	0	0	0.00154938	0.00724498	0	0	0.00458484
OTU_292	___aj889981.1__gi:61657601_ ;k__fungi;p__basidiomycota;c__agaricomycetes;o__thelephorales;f__thelephoraceae;g__tomentella;s__tomentella bryophila;subkingdom__dikarya;superkingdom__eukaryota	0.0024138	0	0	0	0	0	0.0066235	0	0	0	0	0	0	0	0	0	0	0	0	0	0	0	0	0	0	0	0	0	0	0	0	0	0	0	0	0	0	0	0	0	0	0	0.000915189	0.00154938	0	0.00217808	0	0
OTU_293	___fj827719.1__gi:268636577_ ;k__fungi;p__chytridiomycota;c__chytridiomycetes;o__spizellomycetales;f__spizellomycetaceae;g__triparticalcar;s__triparticalcar sp.;superkingdom__eukaryota	0	0.00187255	0.00187719	0	0	0	0	0	0.00611883	0	0	0	0	0	0.00191913	0	0.00132165	0	0.00807181	0.00467333	0.0161238	0	0.00113487	0	0.0090313	0.00329099	0	0	0	0	0	0.00860141	0	0	0	0	0.00249559	0	0.00561498	0	0	0	0.00549114	0.00154938	0	0	0	0
OTU_294	fungal sp. ksl3 ;k__fungi;p__cryptomycota;c__cryptomycota;o__cryptomycota;f__cryptomycota;g__paramicrosporidium;s__fungal sp.;superkingdom__eukaryota	0.0036207	0	0.00187719	0	0.00153435	0.00270695	0	0.0206007	0.00152971	0	0.00221769	0	0.00168788	0.00488031	0.00191913	0	0	0	0	0.00155778	0.0014658	0.000816633	0	0	0.00180626	0.0493648	0	0.00188882	0	0	0	0	0	0.00159051	0	0.00155848	0	0.03049	0.00842247	0	0	0	0.00183038	0.00154938	0.012075	0	0.00866116	0.00152828
OTU_295	___jf908008.1__gi:344332967_ ;k__fungi;p__basidiomycota;c__agaricomycetes;o__agaricales;f__entolomataceae;g__entoloma;s__entoloma dichroum;subclass agaricomycetidae;subkingdom__dikarya;superkingdom__eukaryota	0.0012069	0	0	0	0	0	0	0	0	0.00113107	0	0.002503	0	0	0.00575738	0	0	0	0	0.00155778	0.0014658	0	0.00113487	0	0.00090313	0.00164549	0	0.00188882	0.00143841	0.00176367	0.00392395	0	0	0.609165	0	0.00155848	0	0	0.00280749	0	0	0.00406267	0	0	0	0	0	0
OTU_296	sarcodon atroviridis ;k__fungi;p__basidiomycota;c__agaricomycetes;o__thelephorales;f__thelephoraceae;g__sarcodon;s__sarcodon atroviridis;subkingdom__dikarya;superkingdom__eukaryota	0.012069	0.0112353	0.0112632	0	0.00613742	0.00135347	0.00993526	0	0.0397724	0	0	0	0.00337576	0.00976062	0.00383826	0	0.0026433	0	0.00161436	0.0358289	0.00732901	0	0.00113487	0.00070278	0.00361252	0.00822747	0.0105393	0	0.00143841	0	0	0.00286714	0	0	0.00162771	0.00467545	0.00249559	0	0.01123	0	0	0	0.0164734	0.00774689	0.00482998	0.00871232	0	0.00152828
OTU_299	___am084705.1__gi:115430561_ ;k__fungi;p__basidiomycota;c__agaricomycetes;o__boletales;f__pisolithaceae;g__pisolithus;s__pisolithus albus;suborder__sclerodermatineae;subclass agaricomycetidae;subkingdom__dikarya;superkingdom__eukaryota	0.00482759	0.00187255	0	0.908798	0.00153435	0.00135347	0.00165588	0	0	0	0.00110884	0	0.00168788	0	0	0	0	0.00626104	0.00161436	0.00311556	0.00293161	0	0	0	0.00090313	0	0	0	0.00143841	0	0.00196198	0	0	0	0	0.00155848	0	0.00234538	0.0224599	0	0	0.00135422	0	0	0	0.00217808	0	0
OTU_302	___hq875391.1__gi:324435714_ ;k__fungi;p__basidiomycota;c__tremellomycetes;o__tremellales;f__tremellales;g__cryptococcus;s__cryptococcus heimaeyensis;superkingdom__eukaryota;subkingdom__dikarya	0.0012069	0	0.00187719	0.0693361	0.0859238	0.0825619	0	0	0	0.0101796	0.114211	0.00500601	0	0	0.00191913	0	0.00925155	0.00751324	0	0.00311556	0.0014658	0.000816633	0	0.0477891	0.00180626	0	0	0.00188882	0	0.010582	0	0	0	0	0.00325542	0	0.000831864	0	0	0	0	0	0.00183038	0	0	0	0	0
OTU_303	___fj903285.1__gi:237641504_ ;k__fungi;p__ascomycota;c__leotiomycetes;o__leotiomycetes;f__pseudeurotiaceae;g__pseudeurotium;s__pseudeurotium bakeri;superkingdom__eukaryota;subkingdom__dikarya;subphylum__pezizomycotina	0	0	0	0	0	0	0	0	0	0	0	0	0	0	0	0	0	0	0	0.00311556	0	0	0	0	0	0	0	0	0	0	0	0	0	0	0	0	0	0	0	0	0.00193442	0	0	0.00154938	0	0	0.00173223	0.00305656
OTU_304	___fm955449.1__gi:282944065_ ;k__fungi;p__ascomycota;c__sordariomycetes;o__sordariales;f__sordariales;g__ramophialophora;s__ramophialophora sp.;superkingdom__eukaryota;subkingdom__dikarya;subphylum__pezizomycotina;subclass sordariomycetidae	0.0024138	0.0131079	0.00375439	0.00247629	0.00460306	0.00541389	0.00165588	0.0058859	0	0.0033932	0.00776191	0.0012515	0	0.0122008	0.015353	0	0.00925155	0	0.00161436	0.0155778	0.00732901	0	0.00226974	0	0.0090313	0.00164549	0	0.00944412	0.00143841	0.00352734	0.0117719	0.00286714	0.0138485	0.00318102	0.0146494	0.00779241	0.00582305	0.0117269	0	0	0.00386885	0	0.0228797	0.00464814	0.00241499	0	0.00519669	0.00305656
OTU_305	___ay997057.1__gi:62866663_ ;k__fungi;p__fungi;c__zoopagomycotina;o__zoopagales;f__piptocephalidaceae;g__kuzuhaea;s__kuzuhaea moniliformis;superkingdom__eukaryota;subphylum__zoopagomycotina	0.0012069	0.00561766	0	0.00247629	0	0.00135347	0	0.0147148	0	0	0	0.0012515	0	0	0.00767651	0	0.0052866	0	0	0	0	0	0	0	0	0.00164549	0	0	0	0.00176367	0	0	0	0.00159051	0	0	0.0299471	0	0	0.00116054	0	0	0.0741303	0.057327	0.0313949	0	0	0.00611312
OTU_306	___eu414289.1__gi:172055337_ ;k__fungi;p__basidiomycota;c__agaricomycetes;o__boletales;f__boletaceae;g__octaviania;s__octaviania sp.;subfamily__leccinoideae;suborder__boletineae;subclass agaricomycetidae;subkingdom__dikarya;superkingdom__eukaryota	0.0168966	0	0.0206491	0.00742887	0.00153435	0.00541389	0	0.0235436	0	0.00226214	0.00110884	0.002503	0	0.00976062	0.015353	0.00158929	0.00132165	0.00125221	0.00968617	0.0109044	0.0439741	0.0048998	0	0.00070278	0.0189657	0	0.00526963	0	0.00719207	0.015873	0	0.0344056	0.00923233	0.0111336	0.0130217	0.00155848	0.000831864	0	0	0	0	0	0	0	0	0.0457397	0.0190545	0.0076414
OTU_307	___aj496632.1__gi:27528331_ ;k__fungi;p__ascomycota;c__dothideomycetes;o__pleosporales;f__phaeosphaeriaceae;g__phaeosphaeria;s__phaeosphaeria pontiformis;suborder__pleosporineae;subclass pleosporomycetidae;subphylum__pezizomycotina;subkingdom__dikarya;superkingdom__eukaryota	0	0.00374511	0	0.378872	0.107405	0.0974501	0	0.00147148	0.00152971	0.00678641	0.00887075	0.0362936	0	0.00244016	0	0.00953577	0.0145381	0.00125221	0.00161436	0	0	0	0.00453947	0.00070278	0	0	0.00351309	0	0.00143841	0.00176367	0.00392395	0	0	0.00159051	0	0	0	0.00234538	0.00280749	0.00116054	0.00193442	0	0	0	0	0	0	0
OTU_309	___ay035666.1__gi:15809618_ ;k__fungi;p__glomeromycota;c__glomeromycetes;o__diversisporales;f__diversisporales;g__entrophospora;s__entrophospora sp.;superkingdom__eukaryota	0.00603449	0.00187255	0.00187719	0	0.00153435	0	0.00993526	0	0.00305941	0	0	0	0.00168788	0	0.00383826	0	0	0	0.00161436	0.00934667	0	0	0.00907894	0	0.0298033	0	0	0.00566647	0	0	0	0.00286714	0	0	0	0	0	0.00234538	0	0	0	0	0.00457595	0.00154938	0	0	0.00692893	0
OTU_310	___hq888720.1__gi:321173739_ ;k__fungi;p__blastocladiomycota;c__blastocladiomycetes;o__blastocladiales;f__blastocladiaceae;g__allomyces;s__allomyces javanicus;superkingdom__eukaryota	0.00603449	0.00187255	0.0131404	0	0.00153435	0.00135347	0.00496763	0.027958	0.00611883	0	0	0	0.00168788	0.00488031	0.00575738	0	0	0	0.00645745	0.00311556	0	0	0	0	0.0316096	0.0164549	0	0.00188882	0.00575366	0	0	0	0.00230808	0.00477152	0	0	0.0199647	0.00234538	0.01123	0	0	0	0	0.00309876	0.00482998	0.00435616	0.0121256	0.00611312
OTU_311	___fj487918.1__gi:218938067_ ;k__fungi;p__ascomycota;c__sordariomycetes;o__trichosphaeriales;f__trichosphaeriaceae;g__nigrospora;s__nigrospora oryzae;subphylum__pezizomycotina;subkingdom__dikarya;superkingdom__eukaryota	0	0	0	0	0	0	0	0	0	0	0	0	0	0	0	0	0	0	0	0	0	0	0	0	0	0	0	0	0	0	0	0	0	0	0	0	0	0	0	0	0	0	0	0	0	0	0	0
OTU_312	___fj903372.1__gi:237641591_ ;k__fungi;p__ascomycota;c__eurotiomycetes;o__chaetothyriales;f__herpotrichiellaceae;g__phialophora;s__phialophora sp.;subclass chaetothyriomycetidae;subphylum__pezizomycotina;subkingdom__dikarya;superkingdom__eukaryota	0	0	0	0	0	0	0	0	0	0	0	0	0	0	0	0	0	0	0	0	0	0	0	0	0	0.0181004	0	0	0	0	0	0	0	0	0	0	0.00332745	0.00234538	0	0	0	0	0	0	0	0	0.00173223	0
OTU_314	___hq267964.1__gi:310894145_ ;k__fungi;p__basidiomycota;c__pucciniomycetes;o__septobasidiales;f__septobasidiaceae;g__septobasidium;s__septobasidium sp.;subphylum__pucciniomycotina;subkingdom__dikarya;superkingdom__eukaryota	0.0108621	0	0.0187719	0.00495258	0.00306871	0	0.00827938	0	0.0275347	0	0	0.0012515	0.00337576	0	0.00383826	0	0.0079299	0.00876545	0.00807181	0.00934667	0.00586321	0	0.00113487	0	0.0126438	0.00164549	0.0913402	0.00188882	0.0186994	0.0299824	0.00196198	0.0344056	0.00230808	0	0.00813855	0	0.00415932	0.00234538	0	0	0.00193442	0	0	0.00154938	0.00482998	0.00435616	0	0.00305656
OTU_316	fungal sp. ksl3 ;k__fungi;p__cryptomycota;c__cryptomycota;o__cryptomycota;f__cryptomycota;g__paramicrosporidium;s__fungal sp.;superkingdom__eukaryota	0.0012069	0.00187255	0	0.00247629	0	0.00135347	0.00165588	0	0	0	0.00332653	0.0012515	0.0236303	0.0268417	0.00383826	0	0	0	0.0387447	0.0295978	0	0	0.00113487	0	0.0090313	0	0	0.00188882	0	0.00176367	0.00196198	0	0.00692425	0	0	0	0	0	0	0	0	0	0.0155582	0.0108457	0.0410549	0	0.0190545	0
OTU_317	___af398436.1__gi:16118523_ ;k__fungi;p__basidiomycota;c__exobasidiomycetes;o__tilletiales;f__tilletiaceae;g__tilletia;s__tilletia caries;subphylum__ustilaginomycotina;subkingdom__dikarya;superkingdom__eukaryota	0.00482759	0.0243432	0	0	0.00767177	0	0.0066235	0	0.00611883	0.00113107	0	0	0.0236303	0	0	0	0.00132165	0	0.0113005	0	0	0	0.00680921	0	0.0108376	0	0	0	0	0.0123457	0	0	0.00923233	0.0174956	0.00651084	0	0.0116461	0.0140723	0.00561498	0	0	0	0.0100671	0	0	0.00217808	0.00519669	0
OTU_318	___dq104720.1__gi:70888516_ ;k__fungi;p__ascomycota;c__saccharomycetes;o__saccharomycetales;f__pichiaceae;g__kregervanrija;s__kregervanrija fluxuum;subphylum__saccharomycotina;subkingdom__dikarya;superkingdom__eukaryota	0.036207	0.0187255	0.0337895	0.00742887	0.00767177	0.00541389	0.0281499	0.0147148	0.0183565	0.00226214	0.00332653	0.0012515	0.0354454	0.0268417	0.0441399	0.00158929	0.0052866	0.00125221	0.0306729	0.0109044	0.0175896	0.00163327	0.00680921	0.00140556	0.0252876	0.0197459	0.00878272	0.00188882	0.00575366	0.021164	0.0215817	0.00573427	0.0184647	0.0127241	0.0309265	0.00467545	0.0191329	0.00469076	0.01123	0.00116054	0.0232131	0	0.019219	0.0433826	0.0217349	0.028315	0.00692893	0.00916969
OTU_319	___aj890436.1__gi:62718901_ ;k__fungi;p__ascomycota;c__dothideomycetes;o__pleosporales;f__didymellaceae;g__phoma;s__phoma eupyrena;suborder__pleosporineae;subclass pleosporomycetidae;subphylum__pezizomycotina;subkingdom__dikarya;superkingdom__eukaryota	0.0108621	0.00749022	0	0.00495258	0.00767177	0.00135347	0.0380851	0	0.00152971	0	0.00332653	0.002503	0	0.0292819	0	0	0.00132165	0.00375662	0	0	0	0	0.00113487	0.00070278	0.020772	0.00164549	0.00526963	0.00188882	0	0	0.00980988	0	0.00461617	0	0	0	0.00415932	0.0234538	0.00280749	0	0.00193442	0	0.00274557	0.00929627	0	0.00435616	0	0
OTU_320	___hq608097.1__gi:312434575_ ;k__fungi;p__fungi;c__mortierellomycotina;o__mortierellales;f__mortierellaceae;g__mortierella;s__mortierella sp.;superkingdom__eukaryota;subphylum__mortierellomycotina	0.0313794	0.00374511	0.00187719	0.00247629	0.00460306	0.00406042	0.0066235	0	0.0107079	0.00904855	0.00221769	0.0112635	0.00168788	0	0	0.0317859	0.00660825	0.0100177	0.00161436	0	0.00293161	0.000816633	0.00226974	0	0.00270939	0.00329099	0	0.00377765	0	0	0.00196198	0.0172028	0.00461617	0.00159051	0	0	0	0	0	0	0	0	0.000915189	0	0	0.0108904	0	0
OTU_321	___aj271629.1__gi:11121249_ ;k__fungi;p__fungi;c__mortierellomycotina;o__mortierellales;f__mortierellaceae;g__mortierella;s__mortierella alpina;superkingdom__eukaryota;subphylum__mortierellomycotina	0.0036207	0.00749022	0.00563158	0.00247629	0	0.00812084	0	0.00147148	0.00764853	0.00226214	0.00221769	0.00375451	0.00337576	0.00732047	0.00575738	0.00476788	0.00660825	0	0.00484308	0.00467333	0.00586321	0.000816633	0.00680921	0	0.00361252	0.00987297	0.00526963	0.00188882	0.00575366	0.00176367	0	0.00286714	0	0.00318102	0	0.00311696	0.00582305	0.00234538	0	0	0	0	0.00915189	0.00309876	0	0.0108904	0	0.00458484
OTU_323	xylaria sp. ax13 ;k__fungi;p__ascomycota;c__sordariomycetes;o__xylariales;f__xylariaceae;g__xylaria;s__xylaria sp.;subclass xylariomycetidae;subphylum__pezizomycotina;subkingdom__dikarya;superkingdom__eukaryota	0.00965519	0	0.00375439	0	0.00306871	0	0.00993526	0.0191292	0	0	0.00221769	0	0	0	0.00191913	0	0	0	0	0.00623111	0.0014658	0	0	0	0.00541878	0.00329099	0.00526963	0.00188882	0	0.010582	0.0176578	0.00286714	0	0.00159051	0.00813855	0.0124679	0.00748677	0	0.00842247	0	0	0	0.0100671	0.0185925	0	0.00217808	0.00519669	0
OTU_325	___dq485617.1__gi:94995469_ ;k__fungi;p__chytridiomycota;c__chytridiomycetes;o__rhizophydiales;f__rhizophydiales;g__operculomyces;s__rhizophydium sp.;superkingdom__eukaryota	0	0	0	0.00495258	0	0	0	0	0	0	0	0	0	0	0	0	0.00132165	0	0	0.00155778	0.00293161	0	0	0	0.00451565	0	0.0122958	0	0	0	0	0.00286714	0.00461617	0.00159051	0.0179048	0	0	0.00234538	0	0	0	0	0.00640633	0	0	0.00217808	0.00173223	0.010698
OTU_326	monosporascus cannonballus ;k__fungi;p__ascomycota;c__sordariomycetes;o__sordariales;f__sordariales;g__monosporascus;s__monosporascus cannonballus;superkingdom__eukaryota;subkingdom__dikarya;subphylum__pezizomycotina;subclass sordariomycetidae	0	0.0149804	0.0112632	0.00247629	0	0.00812084	0.00496763	0.00882885	0	0.00113107	0.00332653	0.0012515	0.00168788	0	0	0	0	0.00250441	0	0.00467333	0.014658	0	0	0	0	0.0263279	0.00878272	0	0	0.00176367	0	0.0344056	0	0.0127241	0.00651084	0.00779241	0.0141417	0.00469076	0.00280749	0	0	0	0.0265405	0.00774689	0.00482998	0.00217808	0.00519669	0.0137545
OTU_327	___aj877222.1__gi:73759717_ ;k__fungi;p__ascomycota;c__eurotiomycetes;o__onygenales;f__arthrodermataceae;g__ctenomyces;s__ctenomyces serratus;subclass eurotiomycetidae;subphylum__pezizomycotina;subkingdom__dikarya;superkingdom__eukaryota	0	0.00561766	0	0	0	0	0.00331175	0.0191292	0	0	0	0	0	0	0	0	0	0	0	0	0.0249186	0.000816633	0	0	0	0.00493648	0	0	0	0	0	0	0	0	0	0.00155848	0.0141417	0.00703614	0	0	0	0	0.00274557	0.00774689	0	0	0.00173223	0.00152828
OTU_328	___aj301953.1__gi:17426657_ ;k__fungi;p__ascomycota;c__sordariomycetes;o__glomerellales;f__glomerellaceae;g__colletotrichum;s__colletotrichum coccodes;subclass hypocreomycetidae;subphylum__pezizomycotina;subkingdom__dikarya;superkingdom__eukaryota	0	0.0112353	0	0	0	0	0	0	0	0	0	0	0	0	0	0	0	0	0	0.00155778	0	0	0	0	0	0	0	0	0	0	0	0	0	0	0	0	0	0	0	0	0	0	0	0	0	0	0.00346446	0.00152828
OTU_329	___hm999950.1__gi:323404499_ ;k__fungi;p__fungi;c__mucoromycotina;o__mucorales;f__lichtheimiaceae;g__dichotomocladium;s__dichotomocladium elegans;superkingdom__eukaryota;subphylum__mucoromycotina	0.0929312	0.0205981	0.0544386	0	0.0122748	0.0148882	0.0546439	0	0	0	0	0	0.0337576	0	0.00191913	0	0.00396495	0	0.00322872	0.00155778	0.0205212	0.000816633	0.00113487	0	0.0424471	0	0.0298612	0.00566647	0	0	0	0.0860141	0	0	0.0146494	0	0.000831864	0	0.00280749	0.00116054	0	0.00135422	0	0	0	0.00217808	0	0
OTU_331	___fj892747.1__gi:228065046_ ;k__fungi;p__ascomycota;c__sordariomycetes;o__hypocreales;f__nectriaceae;g__fusarium;s__fusarium sp.;subclass hypocreomycetidae;subphylum__pezizomycotina;subkingdom__dikarya;superkingdom__eukaryota	0	0	0.0262807	0.00247629	0	0	0	0	0.00152971	0.00113107	0	0	0	0	0	0	0.00132165	0	0	0	0	0	0.00113487	0.00070278	0.00090313	0	0.0351309	0	0.0143841	0	0	0.312518	0	0	0.0260434	0	0.00998236	0.0140723	0	0.00116054	0	0	0	0	0.00241499	0	0.0190545	0
OTU_332	___fj664825.1__gi:238058296_ ;k__fungi;p__ascomycota;c__eurotiomycetes;o__verrucariales;f__verrucariaceae;g__verrucaria;s__verrucaria andesiatica;subclass chaetothyriomycetidae;subphylum__pezizomycotina;subkingdom__dikarya;superkingdom__eukaryota	0.00965519	0.00561766	0.0319123	0.00247629	0	0.00406042	0.013247	0.00294295	0.0229456	0	0	0.0012515	0.00843939	0.00732047	0.00959564	0	0.00132165	0	0.00484308	0.0155778	0.00293161	0	0	0	0.00270939	0.013164	0.0158089	0	0	0	0.0137338	0.0172028	0.00923233	0	0.00325542	0	0.0116461	0	0.00561498	0	0	0	0.00549114	0.00154938	0	0.00217808	0.00866116	0.0076414
OTU_333	___jn187976.1__gi:339751266_ ;k__fungi;p__ascomycota;c__sordariomycetes;o__glomerellales;f__plectosphaerellaceae;g__gibellulopsis;s__gibellulopsis nigrescens;subclass hypocreomycetidae;subphylum__pezizomycotina;subkingdom__dikarya;superkingdom__eukaryota	0	0	0.0262807	0.00495258	0	0.00676737	0.00993526	0.00294295	0.00305941	0	0	0.00375451	0	0	0	0.00158929	0	0	0.00968617	0.00155778	0.0014658	0	0.00567434	0.00070278	0.00451565	0.00822747	0.00526963	0	0.00143841	0	0.00588593	0.00286714	0.00230808	0.0143146	0.00488313	0	0.000831864	0	0.00280749	0	0	0	0.0118975	0.0139444	0.00724498	0.00217808	0.00346446	0.00152828
OTU_334	eocronartium sp. i12f_02262 ;k__fungi;p__basidiomycota;c__pucciniomycetes;o__platygloeales;f__eocronartiaceae;g__eocronartium;s__eocronartium sp.;subphylum__pucciniomycotina;subkingdom__dikarya;superkingdom__eukaryota	0	0	0	0	0	0	0	0	0	0	0	0	0	0	0	0	0	0	0	0.00311556	0	0	0	0	0	0	0	0	0	0	0	0	0	0	0	0	0	0	0	0	0	0	0	0	0	0	0	0
OTU_335	___hq631053.1__gi:317383374_ ;k__fungi;p__ascomycota;c__sordariomycetes;o__hypocreales;f__hypocreales;g__stilbella;s__stilbella sp.;superkingdom__eukaryota;subkingdom__dikarya;subphylum__pezizomycotina;subclass hypocreomycetidae	0.0036207	0.00749022	0.00187719	0.00247629	0.00460306	0	0.00331175	0.0147148	0.0183565	0	0.00110884	0	0.0118151	0.00732047	0.0134339	0	0.0026433	0.00250441	0.00161436	0.00778889	0.0014658	0	0	0	0	0.00329099	0.0158089	0.00188882	0.00143841	0.00176367	0.00196198	0.00573427	0.00461617	0	0.0162771	0.00779241	0.000831864	0.0117269	0.00561498	0	0	0	0.0118975	0.0170432	0.00241499	0.00871232	0.00173223	0.010698
OTU_336	___fj664877.1__gi:238058348_ ;k__fungi;p__ascomycota;c__eurotiomycetes;o__verrucariales;f__verrucariaceae;g__verrucaria;s__verrucaria nigrescens;subclass chaetothyriomycetidae;subphylum__pezizomycotina;subkingdom__dikarya;superkingdom__eukaryota	0.00482759	0.0187255	0.0168947	0.00990516	0.00460306	0.00135347	0.0198705	0.00441443	0.00764853	0.00113107	0.00332653	0	0.0101273	0.0244016	0.00575738	0.00317859	0.00132165	0	0.00484308	0.0202511	0.00586321	0.000816633	0	0	0.0162563	0.00658198	0.0105393	0	0.00287683	0.0123457	0.00980988	0	0.0230808	0.00159051	0.00651084	0	0.0166373	0.00469076	0.00280749	0	0	0	0.00366076	0.00464814	0.00965997	0.00871232	0.00173223	0.00305656
OTU_337	___eu784378.1__gi:209870902_ ;k__fungi;p__basidiomycota;c__agaricomycetes;o__boletales;f__boletaceae;g__octaviania;s__octaviania asterosperma;subgenus octaviania;subfamily__leccinoideae;suborder__boletineae;subclass agaricomycetidae;subkingdom__dikarya;superkingdom__eukaryota	0.0325863	0.00187255	0.00375439	0	0.00767177	0	0	0.00147148	0	0.00113107	0.00110884	0.002503	0	0.00244016	0.00383826	0	0.00396495	0	0.00322872	0.00155778	0.00586321	0.00163327	0.0034046	0	0.00090313	0	0.0158089	0	0.0115073	0.00176367	0.0215817	0	0.00230808	0.00318102	0	0	0.00665491	0	0.00561498	0	0	0.00135422	0.0430139	0.00154938	0.0313949	0.00871232	0.00173223	0.00152828
OTU_339	___z68189.1__gi:1771821_ ;k__fungi;p__ascomycota;c__sordariomycetes;o__hypocreales;f__hypocreaceae;g__trichoderma;s__hypocrea lixii;subclass hypocreomycetidae;subphylum__pezizomycotina;subkingdom__dikarya;superkingdom__eukaryota	0.0024138	0.00749022	0.00563158	0	0.00306871	0	0.00165588	0	0.00152971	0.0033932	0	0	0.00168788	0.00732047	0.00383826	0.00476788	0	0.00125221	0.00322872	0.00155778	0.0014658	0	0.0034046	0	0.00632191	0.00658198	0.0860706	0	0.00575366	0.00176367	0	0.00860141	0.00923233	0.0111336	0.00325542	0.0233772	0.0116461	0.00234538	0.0196524	0	0	0	0.00549114	0.00154938	0.00241499	0.00217808	0.00346446	0.00305656
OTU_340	___fj478130.1__gi:218454106_ ;k__fungi;p__fungi;c__mortierellomycotina;o__mortierellales;f__mortierellaceae;g__mortierella;s__mortierella alpina;superkingdom__eukaryota;subphylum__mortierellomycotina	0	0.00187255	0	0.00495258	0	0.00135347	0.0149029	0.00294295	0.00305941	0.00113107	0	0	0.00168788	0.00244016	0.00575738	0.00635718	0	0.00250441	0	0.00311556	0	0.000816633	0.00113487	0.00070278	0.00541878	0.00164549	0.0175654	0.0075553	0	0	0	0	0	0.00318102	0	0	0.00249559	0.00234538	0	0	0	0	0.0082367	0.00929627	0	0.0108904	0.00173223	0.00458484
OTU_341	___hq607870.1__gi:312434349_ ;k__fungi;p__ascomycota;c__eurotiomycetes;o__eurotiales;f__aspergillaceae;g__penicillium;s__penicillium citreonigrum;subclass eurotiomycetidae;subphylum__pezizomycotina;subkingdom__dikarya;superkingdom__eukaryota	0	0.00374511	0.00187719	0.00247629	0.00613742	0.00270695	0	0.00147148	0	0	0	0	0.0118151	0	0	0	0.00132165	0	0.00968617	0	0.00439741	0	0	0	0.00541878	0	0.00175654	0	0.00287683	0	0.00196198	0.00286714	0.00461617	0.00318102	0	0	0.0091505	0.00703614	0.00280749	0	0.00193442	0	0	0.00154938	0.00241499	0.00435616	0.00173223	0.00152828
OTU_342	___eu030365.1__gi:154721261_ ;k__fungi;p__ascomycota;c__dothideomycetes;o__pleosporales;f__didymellaceae;g__stagonosporopsis;s__stagonosporopsis cucurbitacearum;suborder__pleosporineae;subclass pleosporomycetidae;subphylum__pezizomycotina;subkingdom__dikarya;superkingdom__eukaryota	0	0	0	0.0222866	0.0230153	0.0365438	0.00165588	0	0	0.0418495	0	0.002503	0	0	0	0	0	0	0	0	0.0014658	0.000816633	0	0	0.00270939	0	0.00175654	0.00188882	0	0	0.00588593	0	0	0	0	0	0	0.00234538	0	0	0	0	0.000915189	0	0.00241499	0	0	0.00152828
OTU_343	___gu233364.1__gi:283139049_ ;k__fungi;p__basidiomycota;c__agaricomycetes;o__agaricales;f__tricholomataceae;g__camarophyllus;s__camarophyllus sp.;subclass agaricomycetidae;subkingdom__dikarya;superkingdom__eukaryota	0.0301725	0.0131079	0.0112632	0.00742887	0.00306871	0.00406042	0.026494	0.0206007	0.0183565	0.00113107	0.00110884	0	0.0219424	0.0341622	0.00191913	0	0.00396495	0.00250441	0.00807181	0.01402	0.0117264	0.000816633	0.00113487	0	0.0180626	0.00822747	0.00526963	0	0.00287683	0	0.0137338	0.00860141	0.0138485	0.00636203	0.011394	0.00623393	0.0091505	0	0.00842247	0.00116054	0.00193442	0	0.0256253	0.0108457	0.0313949	0.00435616	0.0121256	0.00611312
OTU_345	___hq631039.1__gi:317383360_ ;k__fungi;p__ascomycota;c__sordariomycetes;o__sordariales;f__lasiosphaeriaceae;g__cercophora;s__cercophora sp.;subclass sordariomycetidae;subphylum__pezizomycotina;subkingdom__dikarya;superkingdom__eukaryota	0.0024138	0	0	0.00990516	0	0	0	0.00147148	0.00152971	0	0	0	0	0	0	0	0	0	0	0	0	0	0	0	0	0.00493648	0	0	0.00143841	0	0	0	0	0	0	0	0.0091505	0	0.00280749	0	0.0154754	0.0108338	0	0.00154938	0.00241499	0.00217808	0.0173223	0
OTU_346	___hq542914.1__gi:353741781_ ;k__fungi;p__fungi;c__kickxellomycotina;o__kickxellales;f__kickxellaceae;g__ramicandelaber;s__ramicandelaber sp.;superkingdom__eukaryota;subphylum__kickxellomycotina	0.036207	0.00187255	0	0.00742887	0	0.00270695	0.0331175	0.00147148	0.00152971	0.00113107	0.00221769	0	0.00168788	0.0219614	0.030706	0	0.00132165	0.00250441	0	0	0.00293161	0	0.00226974	0	0.0325127	0	0.00175654	0	0	0	0.00196198	0.00573427	0.0115404	0	0	0	0.0207966	0	0	0	0	0	0.00183038	0	0	0.00871232	0	0.00152828
OTU_348	___jf908791.1__gi:344333744_ ;k__fungi;p__basidiomycota;c__agaricomycetes;o__boletales;f__boletaceae;g__tubosaeta;s__tubosaeta brunneosetosa;suborder__boletineae;subclass agaricomycetidae;subkingdom__dikarya;superkingdom__eukaryota	0.0108621	0	0.0187719	0.017334	0	0.00541389	0	0	0	0	0	0.00500601	0.013503	0.0463629	0	0	0	0.00125221	0	0	0	0.000816633	0.00680921	0	0	0	0	0	0	0.00176367	0	0	0	0	0.0130217	0	0	0.0234538	0	0	0	0	0.00183038	0	0	0	0.0381091	0.00152828
OTU_349	___hm999950.1__gi:323404499_ ;k__fungi;p__fungi;c__mucoromycotina;o__mucorales;f__lichtheimiaceae;g__dichotomocladium;s__dichotomocladium elegans;superkingdom__eukaryota;subphylum__mucoromycotina	0.0036207	0	0.114509	0	0.0245497	0.00135347	0.122535	0	0	0	0.00110884	0	0.00168788	0	0	0	0	0	0	0	0.0952772	0.000816633	0	0	0.00090313	0	0	0	0	0	0	0	0.00230808	0.00159051	0	0	0	0	0.00280749	0.00116054	0	0	0	0	0	0.028315	0	0
OTU_351	___hm161473.1__gi:310706526_ ;k__fungi;p__ascomycota;c__lecanoromycetes;o__umbilicariales;f__umbilicariaceae;g__umbilicaria;s__umbilicaria haplocarpa;subclass umbilicariomycetidae;subphylum__pezizomycotina;subkingdom__dikarya;superkingdom__eukaryota	0.0036207	0.00187255	0.0168947	0	0.00153435	0	0.00496763	0	0.00917824	0	0.00110884	0.0012515	0.00168788	0.0195212	0	0	0	0.00125221	0.00322872	0	0.021987	0	0.00113487	0	0.00541878	0	0	0	0	0.00705467	0	0.0114685	0.00461617	0	0	0	0.00998236	0.00703614	0	0	0	0	0.019219	0	0	0.00435616	0.00173223	0.00458484
OTU_354	___hm562211.1__gi:308745283_ ;k__fungi;p__basidiomycota;c__agaricomycetes;o__agaricales;f__pluteaceae;g__volvariella;s__volvariella caesiotincta;subclass agaricomycetidae;subkingdom__dikarya;superkingdom__eukaryota	0	0	0.0168947	0	0	0	0	0	0.00611883	0	0	0	0	0	0	0	0	0.00375662	0	0	0	0	0	0	0	0	0	0	0	0	0	0	0	0	0	0	0	0	0	0	0	0	0	0	0.0193199	0	0.00519669	0
OTU_355	___hq631038.1__gi:317383359_ ;k__fungi;p__ascomycota;c__sordariomycetes;o__sordariales;f__chaetomiaceae;g__zopfiella;s__zopfiella sp.;subclass sordariomycetidae;subphylum__pezizomycotina;subkingdom__dikarya;superkingdom__eukaryota	0.00603449	0.00187255	0.0112632	0	0	0	0.00496763	0.00147148	0.00305941	0	0	0	0.00168788	0	0	0	0	0	0	0.00155778	0.0014658	0	0	0	0.00090313	0	0	0	0.00719207	0	0.00392395	0	0	0	0	0	0.018301	0.0586345	0	0	0	0	0	0	0	0	0	0.00458484
OTU_357	___hq649834.1__gi:317184077_ ;k__fungi;p__ascomycota;c__sordariomycetes;o__hypocreales;f__nectriaceae;g__fusarium;s__fusarium sp.;subclass hypocreomycetidae;subphylum__pezizomycotina;subkingdom__dikarya;superkingdom__eukaryota	0.0012069	0	0.00750878	0	0	0	0.0066235	0.0103003	0	0.0124417	0	0	0.00168788	0.00244016	0.0671695	0.00158929	0.00132165	0.0150265	0	0	0	0.000816633	0.0102138	0	0.00541878	0	0.00175654	0.00944412	0	0	0	0	0	0.0111336	0	0.0264942	0	0	0.00561498	0	0	0	0.000915189	0	0.00965997	0	0	0.00152828
OTU_358	___fj627243.1__gi:223551589_ ;k__fungi;p__basidiomycota;c__agaricomycetes;o__russulales;f__bondarzewiaceae;g__heterobasidion;s__heterobasidion sp.;subkingdom__dikarya;superkingdom__eukaryota	0	0.00187255	0	0	0	0.00135347	0	0.0058859	0	0	0	0.0012515	0	0.0170811	0.0115148	0	0.00132165	0.00125221	0.00161436	0	0.014658	0.000816633	0.00113487	0	0	0.00987297	0	0	0.00143841	0	0	0	0	0	0	0.0124679	0.00415932	0.00938152	0	0	0.00193442	0	0.0320316	0	0	0.00653424	0.00173223	0
OTU_359	___ay776169.1__gi:61187497_ ;k__fungi;p__ascomycota;c__orbiliomycetes;o__orbiliales;f__orbiliaceae;g__vermispora;s__vermispora fusarina;subphylum__pezizomycotina;subkingdom__dikarya;superkingdom__eukaryota	0.0024138	0.00187255	0.00375439	0	0	0.00541389	0.00496763	0.00294295	0	0.00113107	0.00110884	0.002503	0.00337576	0.00244016	0	0	0	0	0	0	0	0	0	0	0	0	0.00526963	0.00377765	0.00287683	0.00529101	0.0117719	0	0	0	0	0	0.00831864	0.00938152	0.00561498	0	0	0	0.00732152	0	0	0	0.00346446	0
OTU_360	___fj372390.1__gi:209967903_ ;k__fungi;p__ascomycota;c__dothideomycetes;o__venturiales;f__sympoventuriaceae;g__ochroconis;s__ochroconis sp.;subphylum__pezizomycotina;subkingdom__dikarya;superkingdom__eukaryota	0	0.00561766	0	0	0	0.00135347	0	0.0058859	0.00305941	0	0.00221769	0.0012515	0.00168788	0	0	0	0.0079299	0	0.00161436	0	0.00586321	0.000816633	0.00113487	0	0	0.00329099	0.00702617	0	0	0	0.00196198	0.0315385	0.00923233	0.00159051	0	0	0.00582305	0.00703614	0.00280749	0	0	0	0.0109823	0	0.00482998	0	0.00519669	0.00152828
OTU_361	mortierella sp. fmr13_4 ;k__fungi;p__fungi;c__mortierellomycotina;o__mortierellales;f__mortierellaceae;g__mortierella;s__mortierella sp.;superkingdom__eukaryota;subphylum__mortierellomycotina	0.0313794	0.0149804	0.0337895	0.0222866	0.0168779	0.0162417	0.0198705	0.0250151	0.0413021	0.0147039	0.021068	0.032539	0.0371333	0.0170811	0.0287869	0.0397324	0.026433	0.0350618	0.0242154	0.0373867	0.0366451	0.00163327	0.0272368	0	0.0352221	0.0246824	0.0228351	0.0207771	0.0115073	0.00705467	0.0313916	0.0573427	0.0300051	0.0143146	0.00488313	0.00311696	0.0216285	0.0750522	0.0308824	0.00232107	0	0	0.0274557	0.0170432	0.0193199	0.0174246	0.0363769	0.0336222
OTU_362	___dq393594.1__gi:89113922_ ;k__fungi;p__ascomycota;c__sordariomycetes;o__hypocreales;f__hypocreales;g__acremonium;s__acremonium sp.;superkingdom__eukaryota;subkingdom__dikarya;subphylum__pezizomycotina;subclass hypocreomycetidae	0.0144828	0.00561766	0	0	0	0.00406042	0.0115911	0	0.0168268	0.00226214	0.00110884	0	0.0118151	0.00732047	0.0115148	0	0.0026433	0	0.00484308	0.00467333	0.00293161	0.000816633	0.00113487	0	0	0	0.00526963	0	0.00287683	0.00705467	0.0137338	0.00286714	0.00692425	0	0.011394	0.0109094	0.00166373	0	0.00842247	0	0	0	0.00549114	0.00619751	0	0	0.00692893	0.00152828
OTU_363	___eu352773.1__gi:164421754_ ;k__fungi;p__chytridiomycota;c__chytridiomycetes;o__lobulomycetales;f__lobulomycetaceae;g__clydaea;s__clydaea vesicula;superkingdom__eukaryota	0.0555173	0.00187255	0.00187719	0.0148577	0.00153435	0	0.00165588	0.0058859	0	0	0	0	0.0455727	0.00244016	0.00575738	0	0	0	0	0.00623111	0	0	0	0	0.0180626	0.0115185	0.00702617	0	0	0.00529101	0	0	0	0.0127241	0.00162771	0	0	0.0211084	0	0	0	0	0.00183038	0.00309876	0	0	0.00346446	0.00152828
OTU_364	pseudallescheria fimeti ;k__fungi;p__ascomycota;c__sordariomycetes;o__microascales;f__microascaceae;g__lophotrichus;s__pseudallescheria fimeti;subclass hypocreomycetidae;subphylum__pezizomycotina;subkingdom__dikarya;superkingdom__eukaryota	0.0012069	0.00374511	0	0	0	0	0	0.00147148	0.00611883	0	0.00221769	0	0.0118151	0	0	0.00158929	0	0	0	0	0	0	0	0	0.00090313	0.00493648	0.00702617	0.0812194	0.00143841	0.00881834	0	0.00573427	0	0	0	0	0.0291152	0	0	0	0.0154754	0	0.00640633	0	0	0.00653424	0	0.00152828
OTU_365	___hq607888.1__gi:312434367_ ;k__fungi;p__ascomycota;c__sordariomycetes;o__sordariales;f__chaetomiaceae;g__chaetomium;s__chaetomium sp.;subclass sordariomycetidae;subphylum__pezizomycotina;subkingdom__dikarya;superkingdom__eukaryota	0	0.00374511	0	0.00742887	0.00460306	0	0.0066235	0	0.00611883	0.00226214	0.00887075	0.00625751	0	0.00732047	0	0.00158929	0.0026433	0.00125221	0.00484308	0.00311556	0.00732901	0	0.00113487	0	0	0.00822747	0.00351309	0.0868859	0.00143841	0.00176367	0	0	0.00230808	0.00159051	0	0.00155848	0.000831864	0	0.0224599	0	0.00773769	0	0.000915189	0.00929627	0.00965997	0.0130685	0.0121256	0.0076414
OTU_366	___aj271630.1__gi:11121250_ ;k__fungi;p__fungi;c__mortierellomycotina;o__mortierellales;f__mortierellaceae;g__mortierella;s__mortierella alpina;superkingdom__eukaryota;subphylum__mortierellomycotina	0.00603449	0.00374511	0.0150176	0	0	0.00135347	0.00331175	0.00441443	0.00305941	0.00113107	0	0.002503	0.00675151	0	0.00191913	0	0	0.00125221	0.00322872	0.00155778	0.00293161	0	0.00113487	0	0.00270939	0	0.00175654	0	0	0	0.00196198	0.00573427	0	0.00159051	0	0.00311696	0.00415932	0.00703614	0	0	0	0	0.00366076	0	0.00482998	0.00435616	0.00173223	0.00458484
OTU_367	___am262438.1__gi:95136119_ ;k__fungi;p__basidiomycota;c__tremellomycetes;o__cystofilobasidiales;f__cystofilobasidiaceae;g__cystofilobasidium;s__cryptococcus macerans;subkingdom__dikarya;superkingdom__eukaryota	0	0.00187255	0.00187719	0.148577	0.0613742	0.0351903	0.00165588	0.00147148	0.00152971	0.0237524	0.00332653	0.020024	0	0.00244016	0	0.00317859	0.0026433	0	0.00322872	0.00311556	0	0	0.00113487	0.0210834	0.00361252	0	0	0.00377765	0.00143841	0	0	0.00286714	0	0	0	0	0	0	0	0	0	0	0	0	0	0	0	0
OTU_369	phylloporus sp. hkas 74689 ;k__fungi;p__basidiomycota;c__agaricomycetes;o__boletales;f__boletaceae;g__phylloporus;s__phylloporus sp.;subfamily__xerocomoideae;suborder__boletineae;subclass agaricomycetidae;subkingdom__dikarya;superkingdom__eukaryota	0	0	0.0168947	0	0.00306871	0.00541389	0.00827938	0.0294295	0.00305941	0	0	0.015018	0.00675151	0.0122008	0.0115148	0	0.00660825	0	0.00322872	0.0109044	0.0205212	0.000816633	0.00226974	0	0.00541878	0.0148095	0.00526963	0	0	0.0546737	0	0.00286714	0.0207727	0	0	0.00155848	0.00499118	0.00469076	0.00280749	0	0.00193442	0.00135422	0.00457595	0	0	0.00435616	0	0.00458484
OTU_370	___af294698.1__gi:10799051_ ;k__fungi;p__basidiomycota;c__ustilaginomycetes;o__ustilaginales;f__ustilaginaceae;g__pseudozyma;s__pseudozyma antarctica;subphylum__ustilaginomycotina;subkingdom__dikarya;superkingdom__eukaryota	0	0	0	0	0	0	0	0	0	0	0	0	0	0	0	0	0	0	0	0	0	0	0	0	0	0	0	0	0	0	0	0	0	0	0	0	0	0	0	0	0	0	0	0	0	0	0	0
OTU_371	___ay373011.1__gi:39577523_ ;k__fungi;p__fungi;c__fungi;o__fungi;f__olpidiaceae;g__olpidium;s__olpidium brassicae;superkingdom__eukaryota	0.0012069	0.00561766	0.00375439	0	0.00153435	0	0	0.00294295	0.00152971	0	0.00110884	0	0	0	0	0	0	0	0.00161436	0.00467333	0	0	0	0	0	0	0	0	0	0.00176367	0	0	0	0	0.00162771	0.00623393	0.000831864	0.00234538	0	0	0	0	0.00366076	0	0.01449	0	0	0
OTU_372	___gu062204.1__gi:262034938_ ;k__fungi;p__ascomycota;c__dothideomycetes;o__pleosporales;f__sporormiaceae;g__preussia;s__preussia sp.;subclass pleosporomycetidae;subphylum__pezizomycotina;subkingdom__dikarya;superkingdom__eukaryota	0	0	0.00187719	0	0	0	0.00165588	0	0	0	0	0	0	0	0	0	0	0	0	0	0	0	0	0	0	0	0	0.0169994	0.00143841	0	0	0.00860141	0.00461617	0	0	0.00935089	0.00415932	0	0	0	0	0	0.000915189	0	0	0	0.00173223	0
OTU_374	___fj424241.1__gi:213391692_ ;k__fungi;p__ascomycota;c__dothideomycetes;o__dothideomycetes;f__dothideomycetes;g__epicoccum;s__epicoccum nigrum;superkingdom__eukaryota;subkingdom__dikarya;subphylum__pezizomycotina	0	0	0	0.0470495	0.0552368	0.102864	0	0	0	0.00791748	0.00332653	0.00750901	0	0	0	0.00158929	0.0105732	0	0.00161436	0	0	0	0	0	0	0	0	0.00377765	0	0	0.00196198	0	0	0	0	0	0.000831864	0.00703614	0	0.00116054	0	0	0	0	0	0	0	0
OTU_375	___jf439467.1__gi:328923717_ ;k__fungi;p__ascomycota;c__sordariomycetes;o__sordariales;f__chaetomiaceae;g__chaetomium;s__chaetomium nigricolor;subclass sordariomycetidae;subphylum__pezizomycotina;subkingdom__dikarya;superkingdom__eukaryota	0	0	0	0	0	0	0.00165588	0	0	0	0	0	0	0.00488031	0	0	0.00132165	0	0	0	0	0	0	0	0	0	0	0.00188882	0	0	0	0	0	0	0	0	0	0	0	0	0.0754425	0	0.000915189	0.00154938	0	0	0	0
OTU_376	___fj196603.1__gi:209922412_ ;k__fungi;p__ascomycota;c__sordariomycetes;o__glomerellales;f__plectosphaerellaceae;g__plectosphaerella;s__plectosphaerella sp.;subclass hypocreomycetidae;subphylum__pezizomycotina;subkingdom__dikarya;superkingdom__eukaryota	0	0.00374511	0.00187719	0.0123814	0.0168779	0.0162417	0	0	0	0.0033932	0.00110884	0	0	0	0	0.00317859	0.0026433	0.00876545	0.00161436	0	0	0.00163327	0.00680921	0	0	0.00822747	0	0.00377765	0.00287683	0	0	0.00573427	0	0.00318102	0.0179048	0	0.000831864	0	0.00280749	0	0	0	0.00915189	0.00619751	0	0	0	0.00152828
OTU_377	___jn400814.1__gi:363498033_ ;k__fungi;p__basidiomycota;c__tremellomycetes;o__tremellales;f__tremellales;g__cryptococcus;s__cryptococcus dimennae;superkingdom__eukaryota;subkingdom__dikarya	0	0	0	0.0272392	0.0245497	0.0297764	0	0.00294295	0	0.0180971	0.0121973	0.00876051	0	0	0.00383826	0.00794647	0.00660825	0.00626104	0	0.00155778	0	0.000816633	0.00453947	0.0801169	0	0	0	0.00188882	0.00287683	0	0.00196198	0	0	0.00159051	0	0	0	0	0	0	0	0	0	0	0	0	0	0
OTU_378	___dq682581.1__gi:112418328_ ;k__fungi;p__ascomycota;c__sordariomycetes;o__hypocreales;f__nectriaceae;g__fusarium;s__fusarium sp.;subclass hypocreomycetidae;subphylum__pezizomycotina;subkingdom__dikarya;superkingdom__eukaryota	0.0036207	0	0.00187719	0	0.00306871	0.00135347	0	0.00735738	0.00305941	0.015835	0.00332653	0.00750901	0.00337576	0.00488031	0	0.0143037	0.00396495	0.0112699	0.00484308	0.00311556	0.00293161	0.0195992	0.0238322	0.00070278	0.00180626	0.00329099	0.00351309	0.0132218	0.00431524	0.00352734	0.00392395	0	0.00230808	0	0.00488313	0.00311696	0.00582305	0	0	0.0092843	0	0.00135422	0.00457595	0.0108457	0.00965997	0.0152466	0.00519669	0.00611312
OTU_379	fungal sp. ksl3 ;k__fungi;p__cryptomycota;c__cryptomycota;o__cryptomycota;f__cryptomycota;g__paramicrosporidium;s__fungal sp.;superkingdom__eukaryota	0.012069	0.00749022	0.0112632	0.00742887	0.00153435	0.00270695	0	0	0	0	0.00110884	0	0.00168788	0	0.00383826	0.00158929	0.00132165	0	0.00807181	0.0186933	0.0117264	0	0	0	0.0171595	0.00987297	0	0	0.00719207	0.0229277	0.00392395	0	0	0.00159051	0.00162771	0	0.000831864	0	0	0	0	0	0.00183038	0	0.00482998	0.00435616	0.00866116	0
OTU_380	___ay254160.1__gi:37956619_ ;k__fungi;p__ascomycota;c__sordariomycetes;o__hypocreales;f__hypocreales;g__myrothecium;s__myrothecium atrum;superkingdom__eukaryota;subkingdom__dikarya;subphylum__pezizomycotina;subclass hypocreomycetidae	0.0012069	0.00374511	0.0131404	0	0.00153435	0.00135347	0.00496763	0.00441443	0.0137674	0.00113107	0.00221769	0	0.00843939	0.00488031	0	0	0.00132165	0	0.0113005	0.0109044	0.00293161	0.000816633	0	0	0	0.00987297	0.00526963	0	0.00575366	0.00352734	0	0.00860141	0.00461617	0.00477152	0	0	0.00748677	0.0140723	0	0	0	0	0.00549114	0.00154938	0	0.0108904	0.00173223	0.00152828
OTU_381	___hq630279.1__gi:325516852_ ;k__fungi;p__fungi;c__mortierellomycotina;o__mortierellales;f__mortierellaceae;g__mortierella;s__mortierella angusta;superkingdom__eukaryota;subphylum__mortierellomycotina	0.00844829	0	0.00563158	0.00495258	0.00767177	0.00135347	0.00827938	0.00147148	0.00458912	0	0.00332653	0.00375451	0.00506363	0.00732047	0	0.00158929	0.00132165	0.00125221	0.00161436	0.00311556	0.00439741	0	0	0	0.00541878	0.00329099	0	0	0.00575366	0.00176367	0.00588593	0	0	0	0.00162771	0.00311696	0.00831864	0	0	0	0	0.00135422	0.00915189	0.00154938	0.00241499	0	0.00346446	0.0076414
OTU_382	___jf951153.1__gi:338809115_ ;k__fungi;p__ascomycota;c__sordariomycetes;o__magnaporthales;f__magnaporthaceae;g__deightoniella;s__utrechtiana cibiessia;subclass sordariomycetidae;subphylum__pezizomycotina;subkingdom__dikarya;superkingdom__eukaryota	0	0.00749022	0.00375439	0	0.00460306	0.00135347	0.00331175	0.00882885	0	0.00113107	0	0	0	0.00244016	0.00191913	0	0	0	0	0	0	0	0	0	0.00451565	0	0	0	0.00719207	0.00352734	0.00392395	0.00286714	0	0.00159051	0	0.00311696	0.00415932	0.00234538	0.00561498	0	0	0.00135422	0.000915189	0	0.01449	0	0	0
OTU_385	___hq112287.1__gi:316925131_ ;k__fungi;p__ascomycota;c__sordariomycetes;o__hypocreales;f__bionectriaceae;g__stromatonectria;s__stromatonectria caraganae;subclass hypocreomycetidae;subphylum__pezizomycotina;subkingdom__dikarya;superkingdom__eukaryota	0.00603449	0.00187255	0.00187719	0	0	0.00135347	0.0248381	0	0	0	0	0	0.0303818	0	0.00191913	0	0.00132165	0	0.017758	0.00155778	0.00732901	0	0.00113487	0	0.013547	0.00164549	0.0105393	0	0.00287683	0	0.00196198	0.0229371	0.00461617	0.00477152	0.00976626	0.00311696	0.0091505	0.00234538	0	0	0	0	0.0237949	0	0	0.00653424	0	0.00152828
OTU_386	pichia sp. ant03_414 ;k__fungi;p__ascomycota;c__saccharomycetes;o__saccharomycetales;f__pichiaceae;g__pichia;s__pichia sp.;subphylum__saccharomycotina;subkingdom__dikarya;superkingdom__eukaryota	0	0.00374511	0.00750878	0.00247629	0	0.00270695	0.00993526	0.0191292	0	0.00226214	0.00110884	0.00750901	0.00843939	0	0	0.00158929	0	0.00626104	0.00161436	0	0.0014658	0.00163327	0.00907894	0	0.00451565	0.00658198	0.00175654	0.00188882	0	0.00352734	0	0	0	0.00477152	0.00162771	0.0218187	0.00415932	0.00938152	0.00280749	0.00116054	0	0	0	0	0.00241499	0	0.00173223	0
OTU_387	___hq631039.1__gi:317383360_ ;k__fungi;p__ascomycota;c__sordariomycetes;o__sordariales;f__lasiosphaeriaceae;g__cercophora;s__cercophora sp.;subclass sordariomycetidae;subphylum__pezizomycotina;subkingdom__dikarya;superkingdom__eukaryota	0.00603449	0.0112353	0.0150176	0	0.00153435	0.00135347	0	0.00441443	0.0198862	0	0	0	0	0	0.0211104	0	0	0	0	0	0	0.000816633	0	0	0.00451565	0.0115185	0.00702617	0	0.00287683	0.00529101	0	0.00860141	0.00230808	0.00159051	0	0	0	0.0164177	0	0	0	0	0.00274557	0.00154938	0.00482998	0.00435616	0.00173223	0
OTU_388	___hm105568.1__gi:296932841_ ;k__fungi;p__basidiomycota;c__agaricomycetes;o__agaricales;f__tricholomataceae;g__pleurocollybia;s__pleurocollybia imbricata;subclass agaricomycetidae;subkingdom__dikarya;superkingdom__eukaryota	0.0012069	0.0149804	0	0	0	0.00406042	0.079482	0.00441443	0.00152971	0	0	0	0.00168788	0.00488031	0.0268678	0	0	0.00125221	0	0.00467333	0	0	0	0	0	0	0.00175654	0	0.00863049	0.00176367	0.0274677	0	0	0	0	0.0140263	0.00665491	0.00234538	0	0	0	0	0.00183038	0.00464814	0	0	0	0
OTU_389	dictyosporium sp. 19va07 ;k__fungi;p__ascomycota;c__dothideomycetes;o__pleosporales;f__pleosporales;g__dictyosporium;s__dictyosporium sp.;superkingdom__eukaryota;subkingdom__dikarya;subphylum__pezizomycotina;subclass pleosporomycetidae	0	0.00374511	0.00375439	0	0	0.00135347	0	0.00147148	0.00152971	0	0	0	0.0118151	0.00732047	0	0	0	0.00125221	0	0.00311556	0.00586321	0.000816633	0.00113487	0	0	0.00164549	0	0	0	0	0.00196198	0	0	0	0.00488313	0	0.00332745	0.00703614	0	0	0	0	0.00915189	0.00154938	0	0.00435616	0.00346446	0.00152828
OTU_390	___fm178293.1__gi:242253968_ ;k__fungi;p__ascomycota;c__saccharomycetes;o__saccharomycetales;f__pichiaceae;g__pichia;s__pichia membranifaciens;subphylum__saccharomycotina;subkingdom__dikarya;superkingdom__eukaryota	0.0144828	0.0187255	0.00375439	0.00495258	0	0	0	0	0	0	0	0.0012515	0.00168788	0	0.00575738	0	0.00396495	0	0	0	0.0102606	0	0.00226974	0	0.00632191	0	0.00175654	0	0.00143841	0.00176367	0	0	0	0	0	0	0.00166373	0.00703614	0	0	0	0	0	0	0.00965997	0	0	0.00152828
OTU_392	___ay204589.1__gi:28974813_ ;k__fungi;p__ascomycota;c__leotiomycetes;o__helotiales;f__leotiaceae;g__alatospora;s__alatospora acuminata;subphylum__pezizomycotina;subkingdom__dikarya;superkingdom__eukaryota	0.0108621	0.0112353	0.00750878	0.00495258	0.00306871	0.00406042	0.0149029	0.00294295	0.00611883	0	0.00221769	0.002503	0.00168788	0.0195212	0.00575738	0	0.0026433	0.00125221	0.00484308	0.00623111	0.0161238	0	0	0	0.0126438	0.00658198	0.00702617	0.00188882	0	0.00176367	0.00392395	0.00860141	0.00230808	0	0	0.00155848	0.0091505	0.00938152	0	0	0	0	0	0	0	0.00653424	0	0
OTU_393	pseudeurotium sp. 02nh04 ;k__fungi;p__ascomycota;c__leotiomycetes;o__leotiomycetes;f__pseudeurotiaceae;g__pseudeurotium;s__pseudeurotium sp.;superkingdom__eukaryota;subkingdom__dikarya;subphylum__pezizomycotina	0.00482759	0	0.00750878	0	0	0	0.00496763	0.00147148	0.00305941	0	0	0	0.00675151	0	0.00191913	0	0	0.00125221	0.00322872	0.00467333	0.00586321	0	0.00113487	0	0.00451565	0.00164549	0.00175654	0.00188882	0.00575366	0.00352734	0.00784791	0	0.00461617	0.00477152	0.00325542	0.00467545	0.00665491	0.00234538	0.00280749	0	0	0	0.00366076	0.00309876	0.00241499	0.00217808	0	0.00305656
OTU_394	ramaria suecica ;k__fungi;p__basidiomycota;c__agaricomycetes;o__gomphales;f__gomphaceae;g__ramaria;s__ramaria suecica;subclass phallomycetidae;subkingdom__dikarya;superkingdom__eukaryota	0.0193104	0.00936277	0.00375439	0.00742887	0.00460306	0.00135347	0.00496763	0.00147148	0.00152971	0	0	0	0.0101273	0	0.00191913	0	0.0026433	0	0.00322872	0.00778889	0	0	0	0	0.00090313	0.00164549	0	0	0	0.00176367	0.00196198	0	0	0.00159051	0.00488313	0.00311696	0	0.00234538	0.00561498	0	0	0	0.00732152	0.0216913	0.00241499	0	0.00692893	0.00611312
OTU_395	___dq525522.1__gi:103000951_ ;k__fungi;p__ascomycota;c__lecanoromycetes;o__acarosporales;f__acarosporaceae;g__pleopsidium;s__pleopsidium gobiense;subclass acarosporomycetidae;subphylum__pezizomycotina;subkingdom__dikarya;superkingdom__eukaryota	0	0	0	0	0	0	0	0	0	0	0	0	0	0	0	0	0	0	0	0	0	0	0	0	0	0	0	0	0	0	0	0	0	0	0	0	0	0	0	0	0	0	0	0.00154938	0	0	0	0
OTU_397	clitopilus scyphoides ;k__fungi;p__basidiomycota;c__agaricomycetes;o__agaricales;f__entolomataceae;g__clitopilus;s__clitopilus scyphoides;subclass agaricomycetidae;subkingdom__dikarya;superkingdom__eukaryota	0	0	0	0.0272392	0	0	0	0.00147148	0	0	0	0	0.082706	0	0	0	0.00132165	0	0	0	0	0	0	0.00070278	0.0261908	0	0.0105393	0.00188882	0.00143841	0	0	0	0	0	0	0	0	0	0	0	0.00193442	0	0	0.00464814	0	0	0	0
OTU_398	___eu265670.1__gi:161137536_ ;k__fungi;p__ascomycota;c__dothideomycetes;o__pleosporales;f__leptosphaeriaceae;g__leptosphaeria;s__phoma sclerotioides;suborder__pleosporineae;subclass pleosporomycetidae;subphylum__pezizomycotina;subkingdom__dikarya;superkingdom__eukaryota	0	0	0	0	0	0	0	0	0	0	0	0	0	0	0	0	0	0	0	0	0	0	0	0	0	0	0	0	0	0	0	0	0	0	0	0	0	0	0	0	0	0	0.000915189	0	0	0.426904	0	0
OTU_400	___aj300334.1__gi:13539171_ ;k__fungi;p__ascomycota;c__dothideomycetes;o__capnodiales;f__cladosporiaceae;g__cladosporium;s__cladosporium cladosporioides;subclass dothideomycetidae;subphylum__pezizomycotina;subkingdom__dikarya;superkingdom__eukaryota	0.00603449	0.00187255	0	0.0346681	0.047565	0.0378972	0	0	0.00305941	0.0033932	0.00665306	0.002503	0.00168788	0	0	0.00158929	0	0	0	0	0	0.000816633	0	0	0	0.00164549	0.00175654	0	0	0	0	0.00286714	0	0	0	0	0.00332745	0	0	0	0	0	0	0	0	0.026137	0.00346446	0.00152828
OTU_401	___eu164801.1__gi:157932568_ ;k__fungi;p__ascomycota;c__dothideomycetes;o__capnodiales;f__mycosphaerellaceae;g__ramularia;s__ramularia coccinea;subclass dothideomycetidae;subphylum__pezizomycotina;subkingdom__dikarya;superkingdom__eukaryota	0	0	0.00375439	0.00495258	0.00460306	0	0.00331175	0	0.00611883	0.00113107	0.00332653	0	0.00675151	0.0268417	0	0	0.00132165	0	0.00322872	0	0	0	0	0.00070278	0	0.00329099	0.00175654	0	0	0	0	0.00286714	0.00923233	0	0.00325542	0.00467545	0	0.00938152	0.00561498	0	0	0	0.0183038	0.00154938	0.00724498	0.00217808	0	0.00305656
OTU_402	___eu669387.1__gi:193297393_ ;k__fungi;p__ascomycota;c__pezizomycetes;o__pezizales;f__pyronemataceae;g__pseudaleuria;s__pseudaleuria quinaultiana;subphylum__pezizomycotina;subkingdom__dikarya;superkingdom__eukaryota	0	0.0131079	0	0	0	0	0	0	0	0	0.00110884	0.0012515	0.00675151	0	0	0	0	0	0	0	0	0	0	0	0	0.0115185	0	0	0.00143841	0	0	0.00286714	0	0.00318102	0	0	0.00582305	0.00234538	0.00280749	0	0	0	0	0.00464814	0.00482998	0.00653424	0	0.010698
OTU_404	___aj581036.1__gi:45752205_ ;k__fungi;p__basidiomycota;c__tremellomycetes;o__tremellales;f__tremellales;g__cryptococcus;s__cryptococcus podzolicus;superkingdom__eukaryota;subkingdom__dikarya	0	0	0.00187719	0	0.00153435	0	0	0	0	0.00226214	0	0.00500601	0	0.00488031	0	0	0	0	0	0	0	0	0	0	0	0	0	0	0.00575366	0	0	0.00573427	0	0.00159051	0.0195325	0	0	0	0	0	0.00193442	0	0	0	0.00965997	0	0	0
OTU_405	uncultured protoventuria ;k__fungi;p__ascomycota;c__dothideomycetes;o__venturiales;f__venturiaceae;g__protoventuria;s__protoventuria sp.;subphylum__pezizomycotina;subkingdom__dikarya;superkingdom__eukaryota	0.00482759	0.00749022	0	0.00495258	0.00153435	0.00270695	0.00331175	0.0206007	0.00458912	0	0	0.0012515	0.0101273	0	0.00767651	0	0.0026433	0	0.00807181	0.00467333	0.00293161	0	0	0	0.013547	0.00164549	0.00351309	0	0.00287683	0	0.00196198	0.0114685	0.00923233	0	0	0	0.0149735	0.00938152	0.00842247	0	0	0	0.000915189	0.00309876	0	0.00653424	0.00346446	0.0076414
OTU_407	pseudeurotium sp. 02nh04 ;k__fungi;p__ascomycota;c__leotiomycetes;o__leotiomycetes;f__pseudeurotiaceae;g__pseudeurotium;s__pseudeurotium sp.;superkingdom__eukaryota;subkingdom__dikarya;subphylum__pezizomycotina	0.00482759	0.00561766	0.00563158	0	0	0.00135347	0.00331175	0	0.00917824	0	0	0	0.00168788	0.00244016	0	0	0	0	0.00322872	0.00934667	0.0131922	0	0.00113487	0	0.00722504	0.00164549	0	0	0.00575366	0.010582	0.00196198	0	0.00461617	0.0143146	0.00325542	0.00623393	0.00332745	0.0140723	0.00280749	0	0	0.00135422	0.00549114	0.00309876	0.00482998	0.00871232	0.00346446	0.00152828
OTU_408	mortierella sp. 02nh02 ;k__fungi;p__mucoromycota;c__mortierellomycetes;o__mortierellales;f__mortierellaceae;g__mortierella;s__mortierella sp.;superkingdom__eukaryota;subphylum__mortierellomycotina	0.0012069	0.0411962	0	0.017334	0	0	0.0165588	0.00147148	0	0	0.00554422	0.0012515	0.00168788	0.00244016	0	0	0	0	0.00161436	0	0	0	0	0	0	0	0	0.00188882	0	0	0.00196198	0	0.00923233	0	0.0292988	0.00155848	0	0	0	0	0	0	0.000915189	0	0	0.00217808	0.00346446	0.0198677
OTU_409	fungal sp. ksl3 ;k__fungi;p__cryptomycota;c__cryptomycota;o__cryptomycota;f__cryptomycota;g__paramicrosporidium;s__fungal sp.;superkingdom__eukaryota	0	0	0	0.00247629	0.00153435	0.00135347	0	0	0	0	0	0.0012515	0	0	0	0	0	0	0	0.0124622	0.0014658	0	0.00453947	0	0	0	0	0	0.00431524	0.00176367	0.0156958	0	0	0.00159051	0.00162771	0	0.0116461	0.00234538	0	0	0	0	0	0.00154938	0	0	0.00173223	0.0076414
OTU_410	___af486133.1__gi:20136207_ ;k__fungi;p__ascomycota;c__leotiomycetes;o__helotiales;f__helotiales;g__leptodontidium;s__leptodontidium orchidicola;superkingdom__eukaryota;subkingdom__dikarya;subphylum__pezizomycotina	0.0205173	0.0112353	0.00563158	0	0.0107405	0.00270695	0.013247	0.0103003	0.0107079	0.00113107	0.00332653	0.00375451	0.00843939	0.0244016	0.0211104	0	0	0	0.0274441	0.0124622	0.0410425	0	0.00453947	0	0.00632191	0.0329099	0.0105393	0.0075553	0.0115073	0.00529101	0.0137338	0.0315385	0.0161566	0.0127241	0.00325542	0.00155848	0.0158054	0.0609799	0.01123	0.00116054	0	0	0.00183038	0.00619751	0.00965997	0.026137	0.00173223	0.0168111
OTU_411	___ay533557.1__gi:46361599_ ;k__fungi;p__ascomycota;c__eurotiomycetes;o__onygenales;f__ajellomycetaceae;g__emmonsia;s__emmonsia parva;subclass eurotiomycetidae;subphylum__pezizomycotina;subkingdom__dikarya;superkingdom__eukaryota	0.0012069	0.00374511	0.00187719	0	0.00306871	0	0.00331175	0	0.0122377	0.00113107	0.00110884	0.0012515	0	0.00488031	0.00191913	0	0	0	0	0.00155778	0.00586321	0	0	0	0	0.00329099	0.00175654	0	0.00431524	0.00352734	0.00392395	0.00573427	0	0.00477152	0	0	0.00415932	0	0.00561498	0	0.0425573	0	0.00640633	0	0	0.00217808	0.00173223	0
OTU_412	___hm216212.1__gi:296410163_ ;k__fungi;p__ascomycota;c__sordariomycetes;o__hypocreales;f__hypocreales;g__stilbella;s__stilbella aciculosa;superkingdom__eukaryota;subkingdom__dikarya;subphylum__pezizomycotina;subclass hypocreomycetidae	0.00724139	0	0.00563158	0	0.00153435	0.00135347	0.0066235	0.00441443	0	0.0033932	0.00221769	0	0	0	0.00575738	0.00158929	0	0.00125221	0.00807181	0.00155778	0	0	0	0	0	0.00164549	0	0.00188882	0.00143841	0.00176367	0	0	0	0.00318102	0	0	0.00249559	0.00703614	0.00561498	0	0	0	0.00549114	0	0	0	0.00346446	0.00458484
OTU_413	___hq602666.1__gi:315436469_ ;k__fungi;p__ascomycota;c__dothideomycetes;o__pleosporales;f__sporormiaceae;g__preussia;s__preussia sp.;subclass pleosporomycetidae;subphylum__pezizomycotina;subkingdom__dikarya;superkingdom__eukaryota	0	0.00187255	0.0225263	0	0.00153435	0	0.00165588	0	0.0152971	0.00113107	0	0	0	0	0	0	0	0	0	0.00155778	0	0	0.00226974	0	0	0.00164549	0.00175654	0	0.0100689	0	0	0	0	0	0	0.00155848	0.00166373	0	0	0	0.0251475	0.0054169	0.000915189	0.00619751	0.00482998	0	0	0.00305656
OTU_414	___ab459517.1__gi:260161896_ ;k__fungi;p__basidiomycota;c__agaricomycetes;o__boletales;f__pisolithaceae;g__pisolithus;s__pisolithus abditus;suborder__sclerodermatineae;subclass agaricomycetidae;subkingdom__dikarya;superkingdom__eukaryota	0	0.0112353	0.00187719	0.00247629	0	0.00270695	0.00993526	0	0	0.00113107	0	0	0	0	0	0	0	0	0	0.00623111	0	0	0	0	0	0.00658198	0	0	0	0	0	0.0114685	0	0	0	0	0	0	0.0393049	0	0	0	0.00366076	0	0	0.0217808	0.00173223	0.00458484
OTU_415	___hq542912.1__gi:353741779_ ;k__fungi;p__fungi;c__kickxellomycotina;o__kickxellales;f__kickxellaceae;g__ramicandelaber;s__ramicandelaber sp.;superkingdom__eukaryota;subphylum__kickxellomycotina	0.00603449	0.00374511	0.00187719	0.0123814	0	0	0.00165588	0	0.00152971	0	0	0	0.00168788	0	0.00959564	0	0	0	0.104933	0	0	0	0	0	0.0334158	0.00658198	0.00175654	0	0	0	0	0	0	0	0	0	0.00166373	0.00938152	0	0	0	0	0	0	0.00482998	0	0	0.00458484
OTU_416	___ay740172.1__gi:57471484_ ;k__fungi;p__basidiomycota;c__ustilaginomycetes;o__ustilaginales;f__ustilaginaceae;g__ustilago;s__ustilago striiformis;subphylum__ustilaginomycotina;subkingdom__dikarya;superkingdom__eukaryota	0.0193104	0	0	0.0222866	0.0230153	0.0135347	0.00165588	0	0.00611883	0.00113107	0.00332653	0.002503	0.013503	0.00244016	0.015353	0	0.0105732	0	0	0.00311556	0.0014658	0	0.00113487	0.00281112	0	0	0.00702617	0.00377765	0.0143841	0.010582	0.00392395	0	0	0	0.0195325	0.0140263	0.00249559	0	0.00280749	0	0	0	0.000915189	0	0	0.00217808	0	0
OTU_417	___eu218895.1__gi:159138963_ ;k__fungi;p__basidiomycota;c__agaricomycetes;o__cantharellales;f__ceratobasidiaceae;g__ceratorhiza;s__ceratorhiza sp.;subkingdom__dikarya;superkingdom__eukaryota	0.00724139	0.00561766	0.0187719	0	0	0	0	0	0.00305941	0.00113107	0	0	0.0101273	0	0.00191913	0	0	0	0	0.00155778	0.00439741	0	0	0	0	0.00329099	0	0	0.00143841	0.00705467	0.00196198	0	0	0	0	0	0.0357701	0	0.00280749	0	0	0	0.00457595	0	0	0.00217808	0	0
OTU_418	___dq339547.1__gi:84873876_ ;k__fungi;p__ascomycota;c__eurotiomycetes;o__eurotiales;f__aspergillaceae;g__penicillium;s__penicillium expansum;subclass eurotiomycetidae;subphylum__pezizomycotina;subkingdom__dikarya;superkingdom__eukaryota	0.0024138	0.00374511	0.00750878	0.00247629	0.00306871	0.00135347	0.0115911	0.00441443	0.00152971	0.00226214	0.00110884	0.002503	0	0.00244016	0.00191913	0.00158929	0.0052866	0.00125221	0.00807181	0.0124622	0	0	0	0.00070278	0	0	0.00526963	0	0	0	0.00980988	0.02007	0.0184647	0.00318102	0	0	0.00166373	0.00703614	0.00561498	0	0.0464262	0	0.0155582	0	0	0.00217808	0	0.00611312
OTU_419	gymnoascus sp. 02nh07 ;k__fungi;p__ascomycota;c__eurotiomycetes;o__onygenales;f__gymnoascaceae;g__gymnoascus;s__gymnoascus sp.;subclass eurotiomycetidae;subphylum__pezizomycotina;subkingdom__dikarya;superkingdom__eukaryota	0	0	0	0	0	0	0	0	0	0	0	0	0	0	0	0	0	0	0	0	0	0	0	0	0	0	0	0	0	0	0	0	0	0	0	0	0	0	0	0	0.00386885	0	0.000915189	0	0	0	0	0
OTU_420	___gu553291.1__gi:292454288_ ;k__fungi;p__ascomycota;c__lecanoromycetes;o__lecanoromycetidae;f__physciaceae;g__rinodina;s__rinodina bischoffii;superkingdom__eukaryota;subkingdom__dikarya;subphylum__pezizomycotina;subclass lecanoromycetidae;suborder__caliciales	0.0941381	0.0449413	0.0262807	0.00742887	0.0153435	0.0135347	0	0	0	0.00226214	0.00110884	0.0012515	0.0286939	0	0.030706	0.00158929	0	0	0.00968617	0.0171356	0.0161238	0.00163327	0.00453947	0	0.00270939	0.0394919	0.00702617	0	0.00143841	0.00352734	0.00392395	0	0.0138485	0.00159051	0.00162771	0.00155848	0.0266196	0	0.0140375	0	0.00193442	0	0.0878582	0	0.0265649	0.0108904	0	0.0687726
OTU_421	___dq983814.1__gi:118429084_ ;k__fungi;p__basidiomycota;c__agaricomycetes;o__sebacinales;f__sebacinales;g__serendipita;s__sebacina vermifera;superkingdom__eukaryota;subkingdom__dikarya	0	0	0	0	0	0	0.013247	0	0.00152971	0	0	0	0.00168788	0	0.00383826	0	0	0	0.00161436	0	0.0131922	0	0.00226974	0	0	0	0	0	0	0	0.0117719	0.00860141	0	0	0	0	0.108142	0.0117269	0	0.00232107	0	0	0	0	0	0	0	0.00152828
OTU_422	coniothyrium minitans ;k__fungi;p__ascomycota;c__dothideomycetes;o__pleosporales;f__didymosphaeriaceae;g__paraphaeosphaeria;s__coniothyrium minitans;suborder__massarineae;subclass pleosporomycetidae;subphylum__pezizomycotina;subkingdom__dikarya;superkingdom__eukaryota	0.00603449	0.00749022	0	0	0.00153435	0.00270695	0	0.00441443	0.0183565	0	0.00332653	0.002503	0.00337576	0.00244016	0.00191913	0	0	0	0.0306729	0	0	0	0.00226974	0	0.00632191	0.00164549	0.00351309	0	0.00287683	0	0	0.00573427	0	0.00159051	0	0.00935089	0.00166373	0	0.00561498	0	0	0	0	0.012395	0.00724498	0.00435616	0.00173223	0
OTU_423	___ab027374.1__gi:7619970_ ;k__fungi;p__ascomycota;c__sordariomycetes;o__hypocreales;f__ophiocordycipitaceae;g__ophiocordyceps;s__ophiocordyceps sobolifera;subclass hypocreomycetidae;subphylum__pezizomycotina;subkingdom__dikarya;superkingdom__eukaryota	0	0	0	0	0	0	0	0	0	0	0	0	0	0	0	0	0.00132165	0	0.00161436	0	0	0	0	0	0	0	0.00702617	0	0	0	0	0	0	0	0	0	0	0	0	0	0	0	0	0	0	0	0	0
OTU_424	___dq983814.1__gi:118429084_ ;k__fungi;p__basidiomycota;c__agaricomycetes;o__sebacinales;f__sebacinales;g__serendipita;s__sebacina vermifera;superkingdom__eukaryota;subkingdom__dikarya	0.0024138	0.00374511	0	0	0	0	0.00165588	0	0	0.00113107	0	0	0	0	0.00383826	0	0	0	0	0	0.00879482	0	0	0	0	0	0	0	0	0	0.00392395	0	0	0	0	0	0.0573986	0	0	0	0	0	0	0.00309876	0	0.00653424	0.00173223	0.00152828
OTU_425	___fj903374.1__gi:237641593_ ;k__fungi;p__ascomycota;c__sordariomycetes;o__hypocreales;f__nectriaceae;g__fusarium;s__nectria haematococca;subclass hypocreomycetidae;subphylum__pezizomycotina;subkingdom__dikarya;superkingdom__eukaryota	0.0748277	0.0599217	0.076965	0.0346681	0.0168779	0.0338368	0.0546439	0.0559161	0.160619	0.0565534	0.0676395	0.0425511	0.0354454	0.102487	0.0537356	0.104893	0.0726907	0.0763846	0.121077	0.143316	0.203747	0.145361	0.750148	0.00562224	0.0867005	0.250115	0.0667486	0.0868859	0.0489061	0.194004	0.206008	0.272378	0.145409	0.0874779	0.128589	0.292995	0.128939	0.100851	0.0758022	0.468857	0	0.00677112	0.106162	0.0836664	0.13041	0.108904	0.0952727	0.0580747
OTU_426	___ay038828.1__gi:14571570_ ;k__fungi;p__basidiomycota;c__tremellomycetes;o__cystofilobasidiales;f__cystofilobasidiaceae;g__mrakia;s__mrakia blollopis;subkingdom__dikarya;superkingdom__eukaryota	0.00965519	0.00374511	0.00187719	0.00247629	0.00767177	0	0.00331175	0.0058859	0	0	0.00110884	0	0.00506363	0.00732047	0.00191913	0.00158929	0.00132165	0	0.00322872	0.00155778	0.00439741	0	0	0.00140556	0.00270939	0.00164549	0.00702617	0.00188882	0.00863049	0.00352734	0.00588593	0.00573427	0	0.00477152	0	0	0.00415932	0.00234538	0.00280749	0	0	0	0.00640633	0.00929627	0.00482998	0.00653424	0.00173223	0.00611312
OTU_427	___eu076949.1__gi:156145890_ ;k__fungi;p__ascomycota;c__eurotiomycetes;o__eurotiales;f__aspergillaceae;g__penicillium;s__penicillium sp.;subclass eurotiomycetidae;subphylum__pezizomycotina;subkingdom__dikarya;superkingdom__eukaryota	0.00965519	0	0.0150176	0.00247629	0	0.00135347	0	0.0176577	0.00458912	0	0	0	0	0	0	0	0	0	0.00484308	0.00311556	0.0014658	0.000816633	0	0	0.00180626	0.00329099	0	0.00188882	0	0	0.00196198	0	0.00230808	0	0	0.00155848	0.0091505	0	0	0	0	0	0	0	0	0	0.00173223	0.0076414
OTU_428	___hq542912.1__gi:353741779_ ;k__fungi;p__fungi;c__kickxellomycotina;o__kickxellales;f__kickxellaceae;g__ramicandelaber;s__ramicandelaber sp.;superkingdom__eukaryota;subphylum__kickxellomycotina	0.00482759	0.00561766	0.00938597	0	0.00767177	0	0.00827938	0.0058859	0.0214159	0.00113107	0.00110884	0	0.00337576	0.00976062	0.00191913	0	0	0	0.0500452	0.00623111	0.00879482	0	0	0	0.0171595	0	0	0	0	0	0.00588593	0.0172028	0.0138485	0	0.00162771	0	0.000831864	0.00234538	0	0.00116054	0	0	0.00183038	0	0	0.00435616	0	0.00611312
OTU_429	___hq888730.1__gi:321173749_ ;k__fungi;p__blastocladiomycota;c__blastocladiomycetes;o__blastocladiales;f__blastocladiaceae;g__blastocladiella;s__blastocladiella britannica;superkingdom__eukaryota	0	0	0	0	0.00306871	0	0.00331175	0.058859	0.00305941	0	0	0	0	0.00244016	0	0	0	0	0	0	0	0	0	0	0.00180626	0	0	0	0.00143841	0	0	0	0	0	0.00162771	0	0	0.0140723	0	0	0	0	0	0	0	0	0	0
OTU_431	___fj040211.1__gi:199595091_ ;k__fungi;p__ascomycota;c__eurotiomycetes;o__eurotiales;f__aspergillaceae;g__aspergillus;s__aspergillus niger;subclass eurotiomycetidae;subphylum__pezizomycotina;subkingdom__dikarya;superkingdom__eukaryota	0	0.00187255	0	0.0321918	0.0168779	0.00406042	0.00165588	0	0	0.0938787	0.0177415	0.015018	0	0	0.00191913	0.00317859	0.00132165	0	0	0	0	0.000816633	0	0.00070278	0.00090313	0	0	0	0	0	0	0.00286714	0	0.0190861	0.00325542	0.00467545	0	0	0	0	0.00193442	0	0	0.00154938	0	0	0	0.00152828
OTU_433	___fj664854.1__gi:238058325_ ;k__fungi;p__ascomycota;c__eurotiomycetes;o__verrucariales;f__verrucariaceae;g__verrucaria;s__verrucaria sp.;subclass chaetothyriomycetidae;subphylum__pezizomycotina;subkingdom__dikarya;superkingdom__eukaryota	0.0398277	0.0280883	0.0225263	0.00742887	0.0138092	0.0108278	0.0347734	0.0161862	0.0214159	0.00113107	0.00221769	0.002503	0.0421969	0.0512433	0.0287869	0	0.0105732	0.00250441	0.00645745	0.0249244	0.0175896	0.0024499	0.00453947	0.00140556	0.0270939	0.00987297	0.0263481	0.00566647	0.0115073	0.0176367	0.0274677	0.0172028	0.0253889	0.0127241	0.011394	0.0140263	0.0266196	0.0375261	0.01123	0.00116054	0	0	0.0173886	0.0185925	0.00965997	0.0217808	0.00692893	0.0336222
OTU_434	___eu218895.1__gi:159138963_ ;k__fungi;p__basidiomycota;c__agaricomycetes;o__cantharellales;f__ceratobasidiaceae;g__ceratorhiza;s__ceratorhiza sp.;subkingdom__dikarya;superkingdom__eukaryota	0.00603449	0.00187255	0.00563158	0	0.00613742	0.00135347	0.00165588	0	0.00152971	0	0	0	0	0	0.0172722	0	0.00132165	0	0	0.00155778	0.0014658	0	0.00113487	0	0.00993443	0.00164549	0	0	0	0	0	0	0	0	0	0	0.0249559	0	0.00842247	0	0	0	0.00366076	0.00464814	0	0	0	0.00152828
OTU_435	___dq865104.1__gi:114704084_ ;k__fungi;p__ascomycota;c__dothideomycetes;o__pleosporales;f__pleosporaceae;g__alternaria;s__alternaria longissima;suborder__pleosporineae;subclass pleosporomycetidae;subphylum__pezizomycotina;subkingdom__dikarya;superkingdom__eukaryota	0.0012069	0.00187255	0.0187719	0	0.00153435	0	0.0066235	0	0	0	0	0	0.00506363	0.00244016	0	0.00158929	0	0	0.00807181	0.00155778	0	0.000816633	0	0	0	0.00329099	0.00526963	0.00566647	0	0	0.00784791	0	0.00230808	0	0	0	0.00166373	0	0	0	0	0	0	0.0185925	0.00965997	0	0.00173223	0
OTU_439	___ay344999.1__gi:37683531_ ;k__fungi;p__basidiomycota;c__ustilaginomycetes;o__ustilaginales;f__ustilaginaceae;g__ustilago;s__ustilago crameri;subphylum__ustilaginomycotina;subkingdom__dikarya;superkingdom__eukaryota	0.0012069	0	0.00750878	0.00247629	0.00613742	0.00135347	0	0	0.0275347	0	0	0	0.00168788	0	0.00191913	0	0	0	0.00484308	0.00467333	0	0	0.00226974	0.00070278	0.00722504	0	0	0	0	0.00881834	0.00196198	0	0	0.0143146	0.00651084	0.00779241	0	0.00938152	0	0	0	0	0	0	0.00241499	0.0130685	0	0
OTU_440	___hq608097.1__gi:312434575_ ;k__fungi;p__fungi;c__mortierellomycotina;o__mortierellales;f__mortierellaceae;g__mortierella;s__mortierella sp.;superkingdom__eukaryota;subphylum__mortierellomycotina	0.0181035	0.0243432	0.0168947	0.0148577	0.00920613	0.0203021	0.0281499	0.0117718	0.0336536	0.0508981	0.0243946	0.0613236	0.0286939	0.0463629	0.0326252	0.17959	0.0237897	0.0588537	0.017758	0.0249244	0.0205212	0.00408317	0.00453947	0.00070278	0.0289002	0.0230369	0.0105393	0.0226659	0.00719207	0.00176367	0.0333536	0.0286714	0.0253889	0.00318102	0	0.00467545	0.0274515	0.018763	0.0252674	0	0.00193442	0	0.0210494	0.00774689	0.0217349	0.0326712	0.0467703	0.0320939
OTU_442	___ay061726.1__gi:22024505_ ;k__fungi;p__basidiomycota;c__agaricomycetes;o__russulales;f__russulaceae;g__russula;s__russula violeipes;subkingdom__dikarya;superkingdom__eukaryota	0.0024138	0.0187255	0	0	0	0	0	0	0	0	0	0	0	0	0	0	0	0	0.0161436	0	0	0	0	0	0	0	0.00175654	0	0	0	0	0	0	0	0	0	0	0	0	0	0	0	0	0.00309876	0	0.00217808	0	0.0565464
OTU_443	___fj903342.1__gi:237641561_ ;k__fungi;p__ascomycota;c__dothideomycetes;o__pleosporales;f__phaeosphaeriaceae;g__paraphoma;s__paraphoma sp.;suborder__pleosporineae;subclass pleosporomycetidae;subphylum__pezizomycotina;subkingdom__dikarya;superkingdom__eukaryota	0.0012069	0.00561766	0	0	0.00460306	0.00406042	0.00993526	0.00294295	0	0	0	0	0	0	0	0.00158929	0	0	0	0	0.0014658	0	0.00113487	0	0	0.00164549	0	0.00188882	0	0	0.00196198	0	0.00461617	0	0	0.00155848	0	0	0	0	0	0	0.000915189	0.00309876	0	0	0	0
OTU_444	___hq607814.1__gi:312434294_ ;k__fungi;p__ascomycota;c__dothideomycetes;o__botryosphaeriales;f__botryosphaeriaceae;g__botryosphaeria;s__botryosphaeria sp.;subphylum__pezizomycotina;subkingdom__dikarya;superkingdom__eukaryota	0.00965519	0.00561766	0.00375439	0	0	0	0.00496763	0	0.00458912	0	0	0	0.00675151	0.00732047	0.00767651	0	0	0	0.00322872	0.00934667	0.00879482	0	0.00113487	0.00070278	0.00541878	0.00164549	0	0	0.00575366	0.00705467	0.00196198	0.00286714	0.00461617	0.00795254	0.00651084	0.00779241	0.00665491	0.00469076	0.00280749	0	0	0	0.00549114	0.0108457	0.00965997	0.00653424	0.00519669	0.00611312
OTU_445	___aj291800.1__gi:11933096_ ;k__fungi;p__ascomycota;c__sordariomycetes;o__hypocreales;f__clavicipitaceae;g__metacordyceps;s__metacordyceps chlamydosporia;subclass hypocreomycetidae;subphylum__pezizomycotina;subkingdom__dikarya;superkingdom__eukaryota	0	0.00187255	0.00187719	0	0	0	0.00165588	0.0176577	0.00152971	0	0.00110884	0	0.00337576	0	0.00191913	0	0	0	0	0.00467333	0	0	0	0	0.00270939	0	0	0	0.00287683	0.00529101	0	0	0.00692425	0	0.00325542	0	0.0091505	0	0	0	0	0	0	0	0	0	0	0
OTU_446	ramaria suecica ;k__fungi;p__basidiomycota;c__agaricomycetes;o__gomphales;f__gomphaceae;g__ramaria;s__ramaria suecica;subclass phallomycetidae;subkingdom__dikarya;superkingdom__eukaryota	0.00844829	0.00374511	0.00187719	0	0.00153435	0	0	0.00294295	0.00917824	0	0	0	0.00843939	0.00244016	0	0	0	0	0.00161436	0.00934667	0	0	0.00113487	0	0.00632191	0.00493648	0.00175654	0	0.00287683	0	0	0.00573427	0	0	0.00162771	0	0	0	0	0	0	0	0.00274557	0.00154938	0	0.00217808	0.00173223	0
OTU_447	___eu326196.1__gi:162285919_ ;k__fungi;p__fungi;c__mucoromycotina;o__mucorales;f__mucoraceae;g__mucor;s__mucor hiemalis;superkingdom__eukaryota;subphylum__mucoromycotina;suborder__mucorineae	0	0	0.00375439	0.0123814	0.0398932	0.0906827	0.00331175	0	0.00152971	0.00565534	0.0255034	0.0012515	0	0	0	0.00158929	0.00660825	0.00250441	0	0	0.0014658	0.00163327	0	0.0035139	0	0.00164549	0	0.00188882	0.00575366	0	0	0	0.00230808	0	0	0	0.00166373	0	0	0	0	0	0	0	0	0	0	0
OTU_448	clavulina sp. jku_2012b ;k__fungi;p__basidiomycota;c__agaricomycetes;o__cantharellales;f__clavulinaceae;g__clavulina;s__clavulina sp.;subkingdom__dikarya;superkingdom__eukaryota	0	0.00749022	0.00750878	0.00247629	0.00153435	0.00270695	0	0	0	0	0	0	0	0	0.00767651	0	0.0026433	0	0	0.00778889	0	0	0	0	0	0.00164549	0	0	0	0	0	0	0.00461617	0	0.00325542	0	0.000831864	0	0	0	0	0	0.0100671	0.00154938	0.00482998	0.0196027	0.00173223	0
OTU_450	___fj664854.1__gi:238058325_ ;k__fungi;p__ascomycota;c__eurotiomycetes;o__verrucariales;f__verrucariaceae;g__verrucaria;s__verrucaria sp.;subclass chaetothyriomycetidae;subphylum__pezizomycotina;subkingdom__dikarya;superkingdom__eukaryota	0.595001	0.428815	0.504965	0.200579	0.236291	0.184072	0.736865	0.417899	0.513982	0.016966	0.127517	0.0400481	0.513115	0.810132	0.447157	0.0301966	0.215429	0.106438	0.410048	0.677633	0.439741	0.024499	0.120296	0.00632502	0.635804	0.480484	0.786931	0.0491094	0.343781	0.566138	0.86327	0.820001	0.927849	0.394446	0.452503	0.339749	0.70542	0.67547	0.701873	0.0092843	0.0116065	0.00406267	0.377973	0.309876	0.383984	0.557588	0.223458	0.664802
OTU_451	___aj496633.1__gi:27527534_ ;k__fungi;p__ascomycota;c__dothideomycetes;o__pleosporales;f__lophiostomataceae;g__lophiostoma;s__lophiostoma arundinis;subclass pleosporomycetidae;subphylum__pezizomycotina;subkingdom__dikarya;superkingdom__eukaryota	0	0	0	0.00742887	0	0	0	0.00735738	0	0	0	0	0	0	0	0	0	0	0.00161436	0	0.00293161	0.000816633	0	0	0.0090313	0	0.00351309	0	0	0	0	0	0.00461617	0	0	0	0.00166373	0	0.00280749	0	0	0	0.0082367	0	0	0.00435616	0.00173223	0.00152828
OTU_453	___hm853976.1__gi:307750517_ ;k__fungi;p__ascomycota;c__dothideomycetes;o__pleosporales;f__melanommataceae;g__herpotrichia;s__herpotrichia juniperi;subclass pleosporomycetidae;subphylum__pezizomycotina;subkingdom__dikarya;superkingdom__eukaryota	0.0036207	0.00749022	0	0	0	0	0	0	0.0107079	0.00226214	0	0	0	0	0	0	0	0.00125221	0	0	0	0	0	0	0	0	0	0	0	0	0.00196198	0	0	0	0	0	0	0	0	0	0	0	0	0	0	0	0	0.00152828
OTU_454	ramaria suecica ;k__fungi;p__basidiomycota;c__agaricomycetes;o__gomphales;f__gomphaceae;g__ramaria;s__ramaria suecica;subclass phallomycetidae;subkingdom__dikarya;superkingdom__eukaryota	0.0024138	0.00561766	0.00563158	0	0.00153435	0.00135347	0.00827938	0.00294295	0	0	0.00221769	0	0.00843939	0.00244016	0	0	0	0	0	0.00623111	0.00293161	0	0	0	0.00180626	0	0	0	0	0.00352734	0	0	0	0	0.00325542	0	0.000831864	0.00234538	0.00280749	0	0	0	0.00915189	0.00929627	0	0.00653424	0.00173223	0.00458484
OTU_455	___jf908571.1__gi:344333528_ ;k__fungi;p__ascomycota;c__leotiomycetes;o__helotiales;f__hyaloscyphaceae;g__pezizella;s__pezizella discreta;subphylum__pezizomycotina;subkingdom__dikarya;superkingdom__eukaryota	0.0012069	0	0	0.00247629	0	0.00541389	0.00331175	0.0147148	0.0152971	0	0.00110884	0	0.00168788	0.0268417	0	0	0	0	0.00645745	0	0.00586321	0.000816633	0	0	0	0.00493648	0	0	0	0	0.00980988	0.0143357	0.00923233	0.00318102	0.00488313	0	0.00166373	0	0	0	0	0	0.000915189	0	0	0.00217808	0	0
OTU_456	___eu284099.1__gi:161778845_ ;k__fungi;p__ascomycota;c__saccharomycetes;o__saccharomycetales;f__saccharomycetales;g__candida;s__candida sp.;superkingdom__eukaryota;subkingdom__dikarya;subphylum__saccharomycotina	0	0.00187255	0	0	0	0	0	0	0.00305941	0	0	0	0	0.00732047	0	0	0	0	0	0	0.0161238	0	0	0	0	0	0	0	0	0	0	0	0	0.00795254	0	0	0	0	0.00561498	0	0	0	0.000915189	0.00154938	0	0	0	0
OTU_457	uncultured termitomyces ;k__fungi;p__basidiomycota;c__agaricomycetes;o__agaricales;f__lyophyllaceae;g__termitomyces;s__termitomyces sp.;subclass agaricomycetidae;subkingdom__dikarya;superkingdom__eukaryota	0	0	0	0	0.00153435	0	0	0	0	0	0	0	0	0	0	0	0	0	0	0	0	0	0	0.00210834	0	0.00164549	0	0	0	0.00176367	0	0	0	0	0	0	0	0	0	0	0	0	0	0.00154938	0	0	0.00173223	0
OTU_459	___aj279480.1__gi:6706327_ ;k__fungi;p__ascomycota;c__leotiomycetes;o__helotiales;f__sclerotiniaceae;g__sclerotinia;s__sclerotinia sp.;subphylum__pezizomycotina;subkingdom__dikarya;superkingdom__eukaryota	0	0	0	0.0891464	0.0490993	0.0906827	0	0.00147148	0.00152971	0	0	0.002503	0	0	0.00191913	0	0.00132165	0.00125221	0	0	0.0014658	0.000816633	0	0	0	0	0.00175654	0.00188882	0.00143841	0	0	0	0	0	0.00325542	0.00155848	0	0	0.00280749	0	0	0	0	0	0	0	0	0
OTU_460	fungal sp. ksl3 ;k__fungi;p__cryptomycota;c__cryptomycota;o__cryptomycota;f__cryptomycota;g__paramicrosporidium;s__fungal sp.;superkingdom__eukaryota	0.0289656	0	0	0	0	0	0.00496763	0	0	0.00113107	0	0	0	0	0.00191913	0	0.00396495	0	0.00484308	0.00155778	0	0	0.00113487	0	0	0	0	0	0	0	0	0	0	0.00159051	0	0	0.0266196	0	0	0	0.00193442	0	0	0	0	0	0.00173223	0
OTU_461	___ef507263.1__gi:145687547_ ;k__fungi;p__basidiomycota;c__agaricomycetes;o__thelephorales;f__thelephoraceae;g__tomentella;s__tomentella sp.;subkingdom__dikarya;superkingdom__eukaryota	0.0289656	0.00187255	0.00938597	0	0.00153435	0.00270695	0	0.00882885	0	0	0	0.0012515	0.00168788	0.00976062	0.00383826	0	0	0	0	0.00311556	0.00293161	0	0	0	0	0	0	0.00188882	0.0115073	0	0	0.00286714	0.0230808	0	0	0	0	0	0	0	0	0	0	0.00464814	0	0	0	0
OTU_462	___hq607814.1__gi:312434294_ ;k__fungi;p__ascomycota;c__dothideomycetes;o__botryosphaeriales;f__botryosphaeriaceae;g__botryosphaeria;s__botryosphaeria sp.;subphylum__pezizomycotina;subkingdom__dikarya;superkingdom__eukaryota	0.0012069	0.00187255	0.00938597	0.00247629	0	0	0.00331175	0.00735738	0	0	0	0	0.0118151	0.00244016	0.00575738	0	0	0	0.00161436	0.00467333	0.0014658	0.00163327	0.00226974	0	0.00180626	0	0	0	0	0.00176367	0	0	0	0.00159051	0.00488313	0.00623393	0.00166373	0.00234538	0	0	0.00193442	0	0.00549114	0.00309876	0.00241499	0.00435616	0.00173223	0
OTU_463	___ay176482.1__gi:37729227_ ;k__fungi;p__basidiomycota;c__agaricomycetes;o__agaricales;f__agaricaceae;g__lepiota;s__lepiota sp.;subclass agaricomycetidae;subkingdom__dikarya;superkingdom__eukaryota	0.00482759	0.00187255	0	0	0	0.00270695	0.00331175	0.0206007	0	0	0	0	0	0	0	0	0.0026433	0	0.00645745	0.0171356	0	0.0024499	0.00113487	0	0.00541878	0	0.00175654	0.00188882	0.00287683	0	0	0.00286714	0.0161566	0.00159051	0	0	0.00665491	0.0140723	0.00280749	0	0	0	0.0128127	0.00154938	0.00241499	0.00217808	0	0.00152828
OTU_465	___ab205209.1__gi:87159719_ ;k__fungi;p__fungi;c__fungi;o__fungi;f__olpidiaceae;g__olpidium;s__olpidium brassicae;superkingdom__eukaryota	0	0	0	0	0	0.00135347	0.0066235	0.0912315	0	0.00113107	0	0	0	0	0	0	0	0	0	0	0.0732901	0.000816633	0	0	0	0	0	0	0	0	0	0.00286714	0	0	0	0	0.000831864	0	0	0	0	0	0	0	0	0	0	0
OTU_466	___eu139138.1__gi:160552301_ ;k__fungi;p__ascomycota;c__eurotiomycetes;o__chaetothyriales;f__herpotrichiellaceae;g__rhinocladiella;s__rhinocladiella sp.;subclass chaetothyriomycetidae;subphylum__pezizomycotina;subkingdom__dikarya;superkingdom__eukaryota	0.00724139	0.0112353	0.00938597	0.00247629	0	0	0.00331175	0	0.0229456	0	0	0	0	0	0.00575738	0	0.00132165	0	0	0	0.014658	0	0.00113487	0	0.00722504	0	0.00351309	0.00188882	0.00143841	0.00529101	0.00392395	0.00286714	0.0138485	0	0.00488313	0	0.00249559	0	0.00280749	0	0	0	0.00183038	0	0	0.00653424	0	0.00152828
OTU_468	___u38577.1__gi:1053111_ ;k__fungi;p__ascomycota;c__pezizomycetes;o__pezizales;f__pyronemataceae;g__tricharina;s__tricharina groenlandica;subphylum__pezizomycotina;subkingdom__dikarya;superkingdom__eukaryota	0	0.00561766	0.00375439	0.00495258	0.00460306	0	0.0115911	0.00294295	0.00305941	0	0	0	0.00506363	0.00732047	0.00191913	0	0	0	0	0.00467333	0.0014658	0	0	0	0.00361252	0	0.00175654	0	0	0	0	0.00286714	0	0	0	0.00155848	0.00166373	0	0	0	0	0	0.00183038	0	0.00482998	0.00435616	0.00173223	0.00305656
OTU_469	cryptococcus saitoi ;k__fungi;p__basidiomycota;c__tremellomycetes;o__filobasidiales;f__filobasidiales;g__cryptococcus;s__cryptococcus saitoi;superkingdom__eukaryota;subkingdom__dikarya	0	0	0	0.00495258	0	0	0.00165588	0	0	0.0033932	0.00110884	0	0	0	0	0	0	0	0	0.00155778	0	0	0.00113487	0.0112445	0	0	0	0.00188882	0.00143841	0.00352734	0.00196198	0	0	0.00159051	0	0.0155848	0.0133098	0	0	0	0	0	0	0	0	0.00217808	0.00173223	0
OTU_471	___z48816.1__gi:1771822_ ;k__fungi;p__ascomycota;c__sordariomycetes;o__hypocreales;f__hypocreaceae;g__trichoderma;s__trichoderma hamatum;subclass hypocreomycetidae;subphylum__pezizomycotina;subkingdom__dikarya;superkingdom__eukaryota	0.0012069	0	0.00375439	0	0.00153435	0.00406042	0.00331175	0.0058859	0.00305941	0.00678641	0	0	0.00506363	0.00488031	0.0115148	0.00317859	0	0.00125221	0.00161436	0.00467333	0.00732901	0	0.00680921	0.00070278	0.00632191	0.00329099	0.0210785	0.00188882	0.00287683	0.00529101	0.00196198	0	0.00230808	0	0	0.00155848	0	0.00234538	0	0	0	0	0.00457595	0	0	0.00435616	0.00866116	0.00305656
OTU_473	___jf908003.1__gi:344332962_ ;k__fungi;p__basidiomycota;c__agaricomycetes;o__agaricales;f__entolomataceae;g__entoloma;s__entoloma platyphylloides;subclass agaricomycetidae;subkingdom__dikarya;superkingdom__eukaryota	0.0012069	0	0	0	0	0	0	0.00294295	0.00152971	0.00226214	0	0	0.00506363	0.00244016	0.00383826	0	0.00132165	0	0.00322872	0.00155778	0	0	0	0	0.00632191	0	0.00702617	0	0.00143841	0.00352734	0.00588593	0.00286714	0	0	0.00813855	0	0.00249559	0	0.00842247	0	0	0	0.00732152	0	0	0.00217808	0.00173223	0.00458484
OTU_474	ramaria suecica ;k__fungi;p__basidiomycota;c__agaricomycetes;o__gomphales;f__gomphaceae;g__ramaria;s__ramaria suecica;subclass phallomycetidae;subkingdom__dikarya;superkingdom__eukaryota	0.00603449	0.00561766	0.00187719	0	0.00153435	0.00135347	0.00331175	0.00294295	0.00152971	0	0.00332653	0.0012515	0.00675151	0.00244016	0.00191913	0	0.0026433	0	0.00322872	0	0	0	0	0	0	0.00658198	0	0.00188882	0	0	0	0.00573427	0	0	0	0.00155848	0.000831864	0	0	0	0	0	0.00366076	0.00464814	0.00482998	0.00217808	0.00519669	0.00152828
OTU_475	___jf439142.1__gi:344165586_ ;k__fungi;p__glomeromycota;c__glomeromycetes;o__glomerales;f__glomeraceae;g__glomus;s__glomus sp.;superkingdom__eukaryota	0.0012069	0.00187255	0	0.00247629	0	0	0.00165588	0.00147148	0	0	0.00110884	0.0012515	0.00168788	0	0.00383826	0	0	0	0.00161436	0	0	0	0	0	0.00090313	0.00164549	0	0	0	0	0	0	0	0	0.00325542	0	0.00249559	0	0	0	0	0	0	0	0	0	0.00173223	0.00305656
OTU_476	lipomyces lipofer ;k__fungi;p__ascomycota;c__saccharomycetes;o__saccharomycetales;f__lipomycetaceae;g__lipomyces;s__lipomyces lipofer;subphylum__saccharomycotina;subkingdom__dikarya;superkingdom__eukaryota	0.00603449	0	0.00187719	0.00247629	0.00153435	0	0.00165588	0	0.00458912	0	0	0.0012515	0.00337576	0.00244016	0.00191913	0	0	0	0	0.00311556	0	0	0.00226974	0	0.0108376	0.00164549	0.00175654	0	0.00287683	0.00176367	0.00392395	0	0	0.00159051	0.00162771	0.00467545	0.00332745	0.00234538	0.00280749	0	0	0.00135422	0.0082367	0	0.00241499	0.00217808	0.00346446	0.00458484
OTU_477	___af193389.1__gi:6467882_ ;k__fungi;p__basidiomycota;c__agaricomycetes;o__thelephorales;f__typhulaceae;g__typhula;s__typhula sp.;subkingdom__dikarya;superkingdom__eukaryota	0	0	0.00187719	0.00247629	0.177985	0.00135347	0	0	0	0	0	0	0	0	0	0	0	0	0.00161436	0	0.0014658	0	0	0	0	0	0	0	0	0	0	0	0	0	0	0	0	0	0	0	0.00193442	0	0	0	0	0	0	0
OTU_478	___gu566261.1__gi:291498449_ ;k__fungi;p__ascomycota;c__sordariomycetes;o__hypocreales;f__clavicipitaceae;g__paecilomyces;s__paecilomyces marquandii;subclass hypocreomycetidae;subphylum__pezizomycotina;subkingdom__dikarya;superkingdom__eukaryota	0.0024138	0	0.00187719	0	0.00306871	0.00135347	0.0115911	0.00294295	0.00305941	0.00113107	0	0	0	0.00244016	0	0	0	0.00125221	0.00322872	0	0.00293161	0	0.00226974	0	0	0.00164549	0.00351309	0	0.00143841	0.00352734	0.00196198	0	0.00461617	0.00795254	0	0.00467545	0.00582305	0	0.00280749	0	0	0	0.00366076	0.00154938	0	0	0.00173223	0
OTU_479	___aj279445.1__gi:6706190_ ;k__fungi;p__ascomycota;c__saccharomycetes;o__saccharomycetales;f__dipodascaceae;g__galactomyces;s__galactomyces geotrichum;subphylum__saccharomycotina;subkingdom__dikarya;superkingdom__eukaryota	0.0012069	0	0.00187719	0	0	0	0	0	0	0	0	0	0.00168788	0	0	0	0	0	0	0	0	0.0024499	0	0	0	0	0	0	0	0	0	0	0	0	0	0	0	0	0	0.0220502	0.0212787	0	0	0	0	0	0	0
OTU_480	___jf439485.1__gi:328923735_ ;k__fungi;p__fungi;c__mortierellomycotina;o__mortierellales;f__mortierellaceae;g__mortierella;s__mortierella elongata;superkingdom__eukaryota;subphylum__mortierellomycotina	0.0132759	0.0112353	0.0150176	0.00495258	0.00460306	0.00270695	0.0149029	0.00441443	0.00917824	0.00452427	0.00776191	0.0137665	0.0151909	0.00732047	0.00191913	0.0349645	0.0079299	0.0175309	0.00645745	0.0109044	0.0102606	0	0.00680921	0	0.00812817	0.00329099	0.00702617	0.0075553	0.00143841	0.00705467	0.00784791	0.00286714	0.00923233	0.00318102	0.00162771	0.00467545	0.00831864	0	0.0140375	0.00116054	0	0.00135422	0.0164734	0.00464814	0.00724498	0.0108904	0.0311802	0.0198677
OTU_481	phialosimplex caninus ;k__fungi;p__ascomycota;c__eurotiomycetes;o__eurotiales;f__aspergillaceae;g__phialosimplex;s__phialosimplex caninus;subclass eurotiomycetidae;subphylum__pezizomycotina;subkingdom__dikarya;superkingdom__eukaryota	0	0.00936277	0.00187719	0	0.00306871	0	0	0	0.00458912	0	0.00110884	0	0.013503	0.00488031	0	0	0	0.00125221	0.00161436	0.00778889	0	0	0	0	0	0.00329099	0	0	0	0.010582	0	0.00286714	0	0.00477152	0.011394	0.00311696	0.000831864	0	0.00280749	0	0.00193442	0	0.000915189	0	0	0.00653424	0	0
OTU_482	___fj903374.1__gi:237641593_ ;k__fungi;p__ascomycota;c__sordariomycetes;o__hypocreales;f__nectriaceae;g__fusarium;s__nectria haematococca;subclass hypocreomycetidae;subphylum__pezizomycotina;subkingdom__dikarya;superkingdom__eukaryota	0.00482759	0.00561766	0.00375439	0	0	0	0.00496763	0.00441443	0.00764853	0.00678641	0.00554422	0.00375451	0.00168788	0.00732047	0	0.0111251	0.0052866	0.00500883	0.00968617	0.00778889	0.0131922	0.0171493	0.0726315	0	0.00541878	0.00987297	0.00175654	0.00944412	0.00431524	0.010582	0.0137338	0	0.00923233	0.00477152	0.00162771	0.0171433	0.00415932	0.00234538	0	0.0266924	0	0	0.00640633	0.00309876	0.00482998	0.00217808	0.00173223	0.00458484
OTU_483	___hq829060.1__gi:327532809_ ;k__fungi;p__ascomycota;c__pezizomycetes;o__pezizales;f__pezizaceae;g__peziza;s__peziza sp.;subphylum__pezizomycotina;subkingdom__dikarya;superkingdom__eukaryota	0	0	0	0	0	0	0	0	0	0	0	0	0	0	0	0	0	0	0	0	0	0	0	0	0	0	0	0	0	0	0.00196198	0	0	0	0	0	0	0	0	0	0	0	0.000915189	0	0	0.0871232	0.0173223	0.0412636
OTU_485	amanita conicobulbosa ;k__fungi;p__basidiomycota;c__agaricomycetes;o__agaricales;f__amanitaceae;g__amanita;s__amanita conicobulbosa;subclass agaricomycetidae;subkingdom__dikarya;superkingdom__eukaryota	0.012069	0.00187255	0	0.00247629	0	0	0.0182146	0.00147148	0.00152971	0.00113107	0	0.0012515	0	0.00244016	0	0.00158929	0	0	0	0.00467333	0	0.000816633	0	0	0.0252876	0.00164549	0	0	0	0	0.00980988	0	0	0	0	0.00779241	0.00332745	0	0.00842247	0	0	0	0.0164734	0	0.00241499	0	0	0
OTU_486	___dq189222.1__gi:76150856_ ;k__fungi;p__ascomycota;c__saccharomycetes;o__saccharomycetales;f__dipodascaceae;g__galactomyces;s__galactomyces geotrichum;subphylum__saccharomycotina;subkingdom__dikarya;superkingdom__eukaryota	0	0	0	0	0	0	0	0	0	0	0	0	0	0	0	0	0	0	0	0	0.0014658	0	0.00113487	0	0	0	0	0.00188882	0	0	0	0	0	0	0	0	0	0	0	0.0162475	0.013541	0	0.00183038	0	0	0	0	0
OTU_487	___hq607888.1__gi:312434367_ ;k__fungi;p__ascomycota;c__sordariomycetes;o__sordariales;f__chaetomiaceae;g__chaetomium;s__chaetomium sp.;subclass sordariomycetidae;subphylum__pezizomycotina;subkingdom__dikarya;superkingdom__eukaryota	0	0.00561766	0	0.00247629	0.00153435	0	0	0.00294295	0	0	0	0	0	0.00244016	0.00191913	0	0	0	0.00161436	0	0	0	0	0	0.0153532	0	0.0122958	0	0	0	0.0176578	0.0172028	0	0	0	0.00155848	0.00499118	0	0	0.00116054	0.00967212	0	0.00274557	0	0.00241499	0	0.00519669	0
OTU_488	___gu059547.1__gi:300432606_ ;k__fungi;p__glomeromycota;c__glomeromycetes;o__glomerales;f__glomeraceae;g__glomus;s__glomus indicum;superkingdom__eukaryota	0.0036207	0	0.00187719	0	0.00153435	0.00541389	0.00331175	0.00147148	0.00458912	0.00113107	0.00110884	0	0	0.00976062	0.0345443	0	0.00132165	0.0100177	0	0.00934667	0.0014658	0	0	0	0.00812817	0	0	0	0.00143841	0	0	0	0.0115404	0	0	0	0	0	0.00842247	0	0	0	0.00366076	0	0	0.026137	0.00346446	0
OTU_489	___z95495.1__gi:3287273_ ;k__fungi;p__ascomycota;c__sordariomycetes;o__hypocreales;f__hypocreaceae;g__hypocrea;s__hypocrea ceramica;subclass hypocreomycetidae;subphylum__pezizomycotina;subkingdom__dikarya;superkingdom__eukaryota	0.0277587	0.0580492	0.0450527	0.00742887	0.00460306	0.00406042	0.026494	0.0191292	0.0474209	0.0147039	0.00332653	0.010012	0.0185667	0.0341622	0.0614121	0.0111251	0.0158598	0.00375662	0.0419734	0.0482911	0.0425083	0.00571643	0.0204276	0.00140556	0.0740567	0.0427829	1.27876	0.00566647	0.0143841	0.0599647	0.082403	0.0430071	0.0323132	0.0540773	0.0716192	0.0264942	0.0565667	0.0469076	0.0842247	0.00232107	0.00580327	0.00135422	0.00915189	0.0278888	0.0265649	0.0196027	0.0329124	0.0244525
OTU_490	mortierella sp. 07ma06 ;k__fungi;p__fungi;c__mortierellomycotina;o__mortierellales;f__mortierellaceae;g__mortierella;s__mortierella sp.;superkingdom__eukaryota;subphylum__mortierellomycotina	0.0567242	0	0	0	0	0	0.00496763	0	0	0	0	0.0012515	0	0	0	0	0	0	0	0.00467333	0	0	0.00113487	0	0	0	0.00175654	0	0	0	0	0	0	0.00159051	0	0	0	0	0	0	0	0	0	0.00154938	0	0.00217808	0	0
OTU_491	___eu681287.1__gi:197342686_ ;k__fungi;p__ascomycota;c__lecanoromycetes;o__teloschistales;f__teloschistaceae;g__teloschistes;s__teloschistes sp.;subfamily__teloschistoideae;suborder__teloschistineae;subclass lecanoromycetidae;subphylum__pezizomycotina;subkingdom__dikarya;superkingdom__eukaryota	0	0.00187255	0	0.00247629	0.00153435	0	0	0	0	0.00113107	0	0.0012515	0	0	0.00191913	0	0	0	0	0	0.0131922	0	0	0	0.0090313	0	0	0	0	0	0.00196198	0	0	0	0	0.00311696	0.00249559	0	0	0	0.00386885	0	0.0109823	0	0	0	0	0
OTU_493	___gu062217.1__gi:262034951_ ;k__fungi;p__ascomycota;c__sordariomycetes;o__coniochaetales;f__coniochaetaceae;g__coniochaeta;s__lecythophora sp.;subclass sordariomycetidae;subphylum__pezizomycotina;subkingdom__dikarya;superkingdom__eukaryota	0	0	0	0	0.00460306	0	0	0	0	0	0	0	0	0	0	0	0	0	0	0	0	0.000816633	0	0	0.00090313	0	0	0	0	0.00529101	0	0	0	0	0	0	0	0	0	0	0	0	0.000915189	0	0	0.00871232	0	0.00152828
OTU_494	___ef432822.2__gi:257412776_ ;k__fungi;p__chytridiomycota;c__chytridiomycetes;o__lobulomycetales;f__lobulomycetaceae;g__maunachytrium;s__maunachytrium keaense;superkingdom__eukaryota	0	0	0	0	0	0	0	0	0	0	0.00110884	0	0	0	0	0	0	0	0	0	0	0	0	0	0	0	0	0	0	0	0	0	0	0	0	0.00155848	0.0923369	0.00234538	0	0	0	0	0	0.00619751	0	0	0	0
OTU_496	___ay999116.1__gi:67644091_ ;k__fungi;p__ascomycota;c__sordariomycetes;o__sordariales;f__lasiosphaeriaceae;g__schizothecium;s__schizothecium glutinans;subclass sordariomycetidae;subphylum__pezizomycotina;subkingdom__dikarya;superkingdom__eukaryota	0.0012069	0	0.0319123	0	0	0	0	0	0	0	0	0.0012515	0	0.00976062	0	0	0	0	0	0	0	0.000816633	0	0	0	0	0	0.00377765	0	0	0.00196198	0	0	0.00795254	0	0	0	0	0	0	0	0	0.0082367	0.00929627	0	0.00217808	0	0.0213959
OTU_497	lasiodiplodia pseudotheobromae ;k__fungi;p__ascomycota;c__dothideomycetes;o__botryosphaeriales;f__botryosphaeriaceae;g__lasiodiplodia;s__lasiodiplodia pseudotheobromae;subphylum__pezizomycotina;subkingdom__dikarya;superkingdom__eukaryota	0.0036207	0	0	0.00247629	0.00306871	0.0108278	0.00331175	0.00147148	0.00764853	0.00113107	0.00332653	0.002503	0.00675151	0.00244016	0.00959564	0	0.00132165	0	0.00645745	0	0.00586321	0	0.00113487	0.00070278	0.00090313	0.00164549	0.00175654	0	0.00719207	0.00176367	0.00196198	0	0.00692425	0.00636203	0.00651084	0.0124679	0.00249559	0.00234538	0.00842247	0	0.00193442	0	0.000915189	0	0	0.00871232	0.00173223	0.00305656
OTU_498	___fm955448.1__gi:282944064_ ;k__fungi;p__ascomycota;c__sordariomycetes;o__sordariales;f__lasiosphaeriaceae;g__cladorrhinum;s__cladorrhinum bulbillosum;subclass sordariomycetidae;subphylum__pezizomycotina;subkingdom__dikarya;superkingdom__eukaryota	0	0	0	0	0	0	0	0	0	0	0.00110884	0	0	0	0	0	0	0	0	0	0	0	0	0.00070278	0	0	0	0.19266	0	0	0	0	0	0	0	0	0	0	0	0	0.00193442	0	0	0	0	0	0	0
OTU_499	___eu035404.1__gi:157325600_ ;k__fungi;p__ascomycota;c__eurotiomycetes;o__chaetothyriales;f__herpotrichiellaceae;g__cladophialophora;s__cladophialophora chaetospira;subclass chaetothyriomycetidae;subphylum__pezizomycotina;subkingdom__dikarya;superkingdom__eukaryota	0	0.00187255	0	0	0	0	0	0	0	0	0	0	0.00168788	0.00732047	0.00191913	0.00158929	0	0	0	0	0	0	0	0	0	0	0	0	0	0	0	0.00573427	0	0	0	0	0	0	0	0	0	0	0	0	0	0	0.0121256	0
OTU_500	___aj876491.1__gi:84452405_ ;k__fungi;p__fungi;c__mucoromycotina;o__mucorales;f__cunninghamellaceae;g__absidia;s__absidia glauca;superkingdom__eukaryota;subphylum__mucoromycotina	0	0	0.00563158	0	0	0	0	0	0	0	0	0	0	0	0.00191913	0	0	0	0	0	0	0	0.00226974	0	0	0	0	0	0	0	0	0	0	0	0	0	0.0906731	0	0	0	0	0	0	0	0	0	0	0
OTU_501	___fj839611.1__gi:241897348_ ;k__fungi;p__ascomycota;c__dothideomycetes;o__pleosporales;f__pleosporaceae;g__alternaria;s__chalastospora gossypii;suborder__pleosporineae;subclass pleosporomycetidae;subphylum__pezizomycotina;subkingdom__dikarya;superkingdom__eukaryota	0	0	0	0.00247629	0.00460306	0.00676737	0	0	0	0.00113107	0.00110884	0.0012515	0	0	0	0	0	0	0	0	0	0	0	0	0	0	0	0.0075553	0	0	0	0	0	0	0	0.00155848	0	0	0	0	0	0	0	0	0	0.0152466	0.0155901	0.0198677
OTU_502	___jn545822.1__gi:356601635_ ;k__fungi;p__ascomycota;c__sordariomycetes;o__hypocreales;f__clavicipitaceae;g__paecilomyces;s__paecilomyces marquandii;subclass hypocreomycetidae;subphylum__pezizomycotina;subkingdom__dikarya;superkingdom__eukaryota	0.0012069	0.00187255	0.00375439	0	0	0	0.00331175	0.00882885	0.00152971	0.00113107	0.00110884	0	0	0.00732047	0.00383826	0	0	0	0.00161436	0.00467333	0.00293161	0	0.00113487	0	0.00722504	0.00329099	0	0	0	0.00176367	0.00196198	0	0	0	0	0	0.00415932	0.00234538	0.00280749	0	0	0	0.00549114	0.0108457	0	0.00217808	0	0
OTU_503	___aj937749.1__gi:91680613_ ;k__fungi;p__ascomycota;c__eurotiomycetes;o__eurotiales;f__aspergillaceae;g__aspergillus;s__aspergillus versicolor;subclass eurotiomycetidae;subphylum__pezizomycotina;subkingdom__dikarya;superkingdom__eukaryota	0	0	0	0	0.00153435	0.00270695	0	0	0	0.00113107	0	0	0	0	0	0	0	0	0.00161436	0	0	0	0	0	0	0	0	0	0	0	0	0	0	0	0	0	0.00499118	0	0	0	0	0	0	0.00154938	0	0	0.00173223	0
OTU_504	___ay845351.1__gi:61743136_ ;k__fungi;p__ascomycota;c__saccharomycetes;o__saccharomycetales;f__saccharomycetales;g__candida;s__candida lignicola;superkingdom__eukaryota;subkingdom__dikarya;subphylum__saccharomycotina	0	0.00187255	0	0	0	0	0	0	0.00305941	0.00113107	0.00110884	0	0	0	0	0	0	0	0	0	0	0	0	0	0.00361252	0.00164549	0.00351309	0	0.00143841	0.00881834	0	0.00286714	0.00230808	0	0	0	0.00582305	0.00938152	0	0	0	0	0	0	0.00241499	0.00871232	0	0
OTU_505	___dq339573.1__gi:84873902_ ;k__fungi;p__ascomycota;c__eurotiomycetes;o__eurotiales;f__aspergillaceae;g__penicillium;s__penicillium glandicola;subclass eurotiomycetidae;subphylum__pezizomycotina;subkingdom__dikarya;superkingdom__eukaryota	0.0012069	0.00187255	0.00187719	0	0	0.00135347	0.00331175	0.00147148	0.00152971	0	0	0	0	0.00732047	0.00767651	0	0.0026433	0	0	0.00467333	0.00293161	0	0.00113487	0	0.00451565	0	0.00526963	0	0	0.00176367	0	0.00573427	0.00461617	0	0	0	0.000831864	0	0.00280749	0	0	0	0.000915189	0.00774689	0	0.00217808	0	0.00152828
OTU_507	geomyces sp. 12nj08 ;k__fungi;p__ascomycota;c__leotiomycetes;o__leotiomycetes;f__pseudeurotiaceae;g__geomyces;s__geomyces sp.;superkingdom__eukaryota;subkingdom__dikarya;subphylum__pezizomycotina	0	0	0.00187719	0	0	0	0.00993526	0	0	0	0	0	0	0	0	0	0	0	0.00161436	0.00155778	0.00732901	0	0.00113487	0	0.00451565	0.00164549	0	0	0.00143841	0.00176367	0	0	0	0.00159051	0	0.00155848	0	0.00469076	0	0	0	0	0	0.00309876	0	0	0.00692893	0
OTU_508	lasiodiplodia pseudotheobromae ;k__fungi;p__ascomycota;c__dothideomycetes;o__botryosphaeriales;f__botryosphaeriaceae;g__lasiodiplodia;s__lasiodiplodia pseudotheobromae;subphylum__pezizomycotina;subkingdom__dikarya;superkingdom__eukaryota	0.0108621	0.00374511	0.00187719	0	0	0	0.00331175	0.00294295	0.00458912	0	0	0	0.00337576	0.00244016	0	0	0.00132165	0	0	0.00155778	0	0	0	0	0.00270939	0	0.00351309	0.00188882	0	0	0.00392395	0	0	0.00159051	0.00162771	0	0	0.00234538	0	0	0	0	0.00549114	0.00309876	0.00724498	0.00653424	0.00346446	0.00152828
OTU_509	___ab237662.1__gi:77799484_ ;k__fungi;p__ascomycota;c__sordariomycetes;o__hypocreales;f__nectriaceae;g__fusarium;s__gibberella fujikuroi;subclass hypocreomycetidae;subphylum__pezizomycotina;subkingdom__dikarya;superkingdom__eukaryota	0.0193104	0.0205981	0.0112632	0.00247629	0.00306871	0.00541389	0.0165588	0.0161862	0.0198862	0.0316699	0.00554422	0.0212755	0.0202545	0.0146409	0.00575738	0.0715183	0.0185031	0.0400706	0.0113005	0.00467333	0.00732901	0.0424649	0.0646875	0.00632502	0.00451565	0.00493648	0.00702617	0.0509982	0.00719207	0.00529101	0.00196198	0.00286714	0	0.00477152	0.00162771	0.00155848	0.00582305	0.00234538	0	0.0174081	0	0.00270845	0.0247101	0.0402838	0.0241499	0.0326712	0.0502347	0.0397353
OTU_511	___gu062309.1__gi:262035043_ ;k__fungi;p__basidiomycota;c__agaricomycetes;o__agaricales;f__psathyrellaceae;g__psathyrella;s__psathyrella candolleana;subclass agaricomycetidae;subkingdom__dikarya;superkingdom__eukaryota	0.00482759	0	0.0150176	0	0	0.00135347	0.00165588	0.00294295	0	0	0.00332653	0	0.00337576	0	0	0	0	0	0.00484308	0.00311556	0	0	0	0	0.00180626	0	0	0	0.00575366	0	0.00588593	0.00286714	0	0.00159051	0	0	0.00166373	0.00234538	0	0	0	0	0.00183038	0.00154938	0.00241499	0.00217808	0	0.00152828
OTU_512	___hq895839.1__gi:323320815_ ;k__fungi;p__ascomycota;c__eurotiomycetes;o__chaetothyriales;f__chaetothyriaceae;g__chaetothyrium;s__chaetothyrium sp.;subclass chaetothyriomycetidae;subphylum__pezizomycotina;subkingdom__dikarya;superkingdom__eukaryota	0.0229311	0.00749022	0.00563158	0	0	0.00541389	0	0.00441443	0	0	0	0	0	0.00488031	0	0	0.00132165	0	0.00322872	0	0.00586321	0	0.00226974	0	0.00541878	0.00164549	0.0281047	0.00188882	0	0	0	0	0	0	0	0	0	0.00703614	0.00280749	0	0	0	0.00915189	0.00154938	0	0	0	0.00458484
OTU_513	___eu035404.1__gi:157325600_ ;k__fungi;p__ascomycota;c__eurotiomycetes;o__chaetothyriales;f__herpotrichiellaceae;g__cladophialophora;s__cladophialophora chaetospira;subclass chaetothyriomycetidae;subphylum__pezizomycotina;subkingdom__dikarya;superkingdom__eukaryota	0	0.00187255	0.00187719	0	0.00306871	0	0.0066235	0	0.00458912	0.00113107	0	0.0012515	0.00168788	0.00244016	0	0	0	0	0.00161436	0	0	0	0.0295066	0	0.00090313	0.00329099	0	0	0	0	0	0	0	0	0	0	0.00166373	0.00469076	0	0	0	0	0	0	0.00241499	0.00217808	0	0
OTU_514	minimedusa polyspora ;k__fungi;p__basidiomycota;c__agaricomycetes;o__cantharellales;f__cantharellales;g__minimedusa;s__minimedusa polyspora;superkingdom__eukaryota;subkingdom__dikarya	0.0012069	0	0	0	0	0	0	0	0	0	0	0	0	0	0.0115148	0	0	0	0	0	0	0	0	0.00070278	0	0	0	0	0	0	0	0	0	0	0	0	0	0	0	0	0	0	0	0	0	0.00435616	0	0.00305656
OTU_515	mortierella sp. 07ma06 ;k__fungi;p__fungi;c__mortierellomycotina;o__mortierellales;f__mortierellaceae;g__mortierella;s__mortierella sp.;superkingdom__eukaryota;subphylum__mortierellomycotina	0.0036207	0	0.00187719	0	0	0.00135347	0.00165588	0.00441443	0.00305941	0.00113107	0.00110884	0	0.0101273	0.00244016	0.00191913	0.00158929	0	0.00375662	0.00484308	0	0.00732901	0	0	0	0.00361252	0	0	0	0.00143841	0.00176367	0.00196198	0	0.00461617	0.00159051	0	0.00155848	0.00415932	0	0.00280749	0	0	0	0.00457595	0	0	0.00217808	0	0.00152828
OTU_516	___eu833654.1__gi:212276602_ ;k__fungi;p__basidiomycota;c__agaricomycetes;o__agaricales;f__lycoperdaceae;g__disciseda;s__disciseda candida;subclass agaricomycetidae;subkingdom__dikarya;superkingdom__eukaryota	0.0036207	0.00561766	0	0	0	0	0.00331175	0	0.0152971	0	0.00110884	0	0.00168788	0.00244016	0	0	0	0	0	0.00467333	0.00293161	0	0	0	0	0.00164549	0.00175654	0	0	0	0.00784791	0	0.0161566	0	0.00488313	0.00155848	0.00166373	0	0	0	0	0	0.00915189	0	0.00241499	0.00217808	0	0.00458484
OTU_517	___jf440622.1__gi:328942650_ ;k__fungi;p__ascomycota;c__dothideomycetes;o__pleosporales;f__pleosporaceae;g__ulocladium;s__ulocladium sp.;suborder__pleosporineae;subclass pleosporomycetidae;subphylum__pezizomycotina;subkingdom__dikarya;superkingdom__eukaryota	0	0	0	0.0222866	0.0337558	0.023009	0.00165588	0.00147148	0	0.0418495	0.0121973	0.0262815	0	0	0	0.00953577	0.00660825	0.00876545	0	0	0	0.00326653	0	0.00070278	0	0	0	0.0169994	0	0	0.00196198	0	0	0	0.00162771	0	0	0	0	0	0	0	0	0	0	0	0.00173223	0
OTU_519	uncultured cenococcum ;k__fungi;p__ascomycota;c__dothideomycetes;o__pleosporomycetidae;f__gloniaceae;g__cenococcum;s__cenococcum sp.;superkingdom__eukaryota;subkingdom__dikarya;subphylum__pezizomycotina;subclass pleosporomycetidae	0.00603449	0.00187255	0.00187719	0.00495258	0.00153435	0	0	0.00147148	0.00152971	0	0	0	0	0	0.00191913	0	0.00132165	0	0.00322872	0.00467333	0.00293161	0	0	0	0.00451565	0.0115185	0.00702617	0	0.00287683	0	0.00392395	0.00286714	0.00461617	0	0	0.00155848	0.0133098	0.00703614	0	0	0	0	0.000915189	0.00154938	0	0	0.00173223	0.00458484
OTU_520	___hq607844.1__gi:312434323_ ;k__fungi;p__fungi;c__mortierellomycotina;o__mortierellales;f__mortierellaceae;g__mortierella;s__mortierella sp.;superkingdom__eukaryota;subphylum__mortierellomycotina	0	0.00187255	0.00187719	0	0	0	0.0066235	0	0	0.00113107	0	0.0012515	0	0.00488031	0	0	0.00132165	0	0	0	0	0	0	0.00070278	0	0	0.0878272	0	0	0	0.00196198	0	0	0.00318102	0	0	0.00582305	0.00234538	0	0	0	0	0.00732152	0.00154938	0.00965997	0	0	0
OTU_521	___dq485685.1__gi:94995537_ ;k__fungi;p__chytridiomycota;c__chytridiomycetes;o__rhizophydiales;f__rhizophydiaceae;g__rhizophydium;s__rhizophydium sp.;superkingdom__eukaryota	0	0	0.0150176	0	0	0	0	0.00882885	0	0	0	0	0.00168788	0	0	0	0	0	0.00161436	0	0.00439741	0	0	0	0.00090313	0	0	0	0.00143841	0	0	0	0	0.00159051	0	0	0.000831864	0.00938152	0	0	0	0	0	0	0	0	0.00346446	0
OTU_522	pycnoporellus fulgens ;k__fungi;p__basidiomycota;c__agaricomycetes;o__polyporales;f__polyporaceae;g__pycnoporellus;s__pycnoporellus fulgens;subkingdom__dikarya;superkingdom__eukaryota	0.00603449	0.00374511	0.00187719	0.00495258	0	0.00135347	0	0	0.00152971	0	0.00110884	0	0	0	0	0	0	0	0	0	0.0014658	0	0	0	0	0	0	0.00188882	0.00143841	0	0.00196198	0	0.00230808	0	0.00162771	0	0.00748677	0.00234538	0	0	0	0	0	0.0108457	0	0	0.00346446	0.00152828
OTU_523	___fm876796.1__gi:229359242_ ;k__fungi;p__glomeromycota;c__glomeromycetes;o__glomerales;f__glomeraceae;g__funneliformis;s__funneliformis coronatum;superkingdom__eukaryota	0.00844829	0.00374511	0.00187719	0	0	0	0.00165588	0.00147148	0.0152971	0	0	0	0.00337576	0.00244016	0.00959564	0	0	0	0.00161436	0.00311556	0.0014658	0.000816633	0.00113487	0.00140556	0.00270939	0.00164549	0	0	0.00143841	0	0	0	0.00461617	0	0	0	0	0.00234538	0	0	0	0	0.00183038	0.00464814	0.00241499	0	0	0.00152828
OTU_524	___hq607812.1__gi:312434292_ ;k__fungi;p__ascomycota;c__sordariomycetes;o__sordariales;f__sordariales;g__paecilomyces;s__paecilomyces sp.;superkingdom__eukaryota;subkingdom__dikarya;subphylum__pezizomycotina;subclass sordariomycetidae	0.0012069	0.00187255	0	0	0	0	0	0	0.00152971	0	0	0.002503	0	0	0	0	0.00132165	0	0.00484308	0	0	0	0	0	0	0.00329099	0.00526963	0	0.00719207	0	0	0	0	0	0.0260434	0	0	0	0	0	0	0	0.00549114	0	0	0.00217808	0.0138579	0
OTU_525	___eu041818.1__gi:157277413_ ;k__fungi;p__ascomycota;c__eurotiomycetes;o__chaetothyriales;f__herpotrichiellaceae;g__veronaea;s__veronaea japonica;subclass chaetothyriomycetidae;subphylum__pezizomycotina;subkingdom__dikarya;superkingdom__eukaryota	0	0	0	0	0	0.00135347	0	0	0	0	0	0	0	0	0	0	0	0	0	0	0.0014658	0	0	0	0	0	0	0	0	0	0	0	0	0	0	0	0	0	0	0	0	0	0	0	0	0	0	0
OTU_526	___gu171370.1__gi:269856495_ ;k__fungi;p__ascomycota;c__orbiliomycetes;o__orbiliales;f__orbiliaceae;g__arthrobotrys;s__arthrobotrys scaphoides;subphylum__pezizomycotina;subkingdom__dikarya;superkingdom__eukaryota	0	0	0	0	0	0.00947431	0.00496763	0	0.00152971	0	0	0	0	0	0	0.00158929	0	0	0.00322872	0	0	0	0	0	0	0.00164549	0	0.0944412	0.00143841	0	0	0	0.0115404	0	0	0	0	0.0257992	0	0	0.00193442	0	0	0	0	0	0	0
OTU_527	mortierella sp. fmr23_12 ;k__fungi;p__fungi;c__mortierellomycotina;o__mortierellales;f__mortierellaceae;g__mortierella;s__mortierella sp.;superkingdom__eukaryota;subphylum__mortierellomycotina	0	0	0.00187719	0	0	0	0	0	0	0	0	0	0	0.00488031	0	0	0	0	0	0	0	0	0	0	0.00090313	0	0	0	0	0.00529101	0	0	0	0	0.00325542	0	0	0	0	0	0	0	0	0	0	0	0	0
OTU_528	___ab126046.2__gi:82175336_ ;k__fungi;p__basidiomycota;c__agaricostilbomycetes;o__agaricostilbomycetes;f__agaricostilbomycetes;g__sporobolomyces;s__sporobolomyces lophatheri;superkingdom__eukaryota;subkingdom__dikarya;subphylum__pucciniomycotina	0.00482759	0.00374511	0.00375439	0.00742887	0.00460306	0	0.0447086	0	0	0.00113107	0.00110884	0.002503	0.00168788	0.0170811	0.00191913	0.00158929	0	0	0.00807181	0.00311556	0	0.000816633	0	0	0	0.00658198	0	0.00188882	0.00143841	0.021164	0.0137338	0	0.0184647	0.00159051	0.00325542	0.00155848	0	0	0	0	0	0	0	0.00154938	0.00482998	0	0	0
OTU_529	___ef394854.1__gi:148529781_ ;k__fungi;p__ascomycota;c__dothideomycetes;o__capnodiales;f__dissoconiaceae;g__uwebraunia;s__dissoconium australiensis;subclass dothideomycetidae;subphylum__pezizomycotina;subkingdom__dikarya;superkingdom__eukaryota	0	0.00187255	0.00187719	0	0	0	0	0.00147148	0.00764853	0	0	0	0	0.00244016	0	0	0	0	0	0	0	0	0	0	0.00722504	0.00329099	0	0	0	0	0	0	0.00230808	0	0	0.00155848	0	0.0234538	0	0	0	0	0.0118975	0.00309876	0	0.00217808	0	0
OTU_530	___eu400587.1__gi:171466633_ ;k__fungi;p__basidiomycota;c__malasseziomycetes;o__malasseziales;f__malasseziaceae;g__malassezia;s__malassezia restricta;subphylum__ustilaginomycotina;subkingdom__dikarya;superkingdom__eukaryota	0.00724139	0	0	0	0	0	0	0	0	0	0	0	0	0	0	0	0	0	0.00645745	0	0	0	0	0	0.00090313	0	0.00175654	0	0	0.00529101	0.00784791	0.02007	0	0	0.00162771	0	0.00166373	0	0.00280749	0	0	0	0.0247101	0.012395	0.00482998	0.00435616	0.00346446	0
OTU_532	ramaria suecica ;k__fungi;p__basidiomycota;c__agaricomycetes;o__gomphales;f__gomphaceae;g__ramaria;s__ramaria suecica;subclass phallomycetidae;subkingdom__dikarya;superkingdom__eukaryota	0.00482759	0.00561766	0	0	0	0	0.00496763	0	0.00458912	0.00113107	0.00110884	0	0.00337576	0	0	0	0.00132165	0	0.00161436	0.00155778	0	0	0	0	0.00180626	0.00329099	0.00175654	0	0.00143841	0	0	0.00286714	0	0	0.00162771	0	0	0	0	0	0	0	0.00457595	0.00774689	0	0.00217808	0.00692893	0.00458484
OTU_534	___fj827733.1__gi:268636591_ ;k__fungi;p__chytridiomycota;c__chytridiomycetes;o__spizellomycetales;f__spizellomycetaceae;g__kochiomyces;s__kochiomyces dichotomus;superkingdom__eukaryota	0	0	0	0.00495258	0	0	0	0.00147148	0	0	0	0	0	0	0	0	0	0	0	0	0	0	0	0	0	0	0	0	0	0	0	0	0	0	0	0	0	0	0	0	0	0	0	0	0	0.00217808	0	0
OTU_535	___fj441035.1__gi:215254273_ ;k__fungi;p__basidiomycota;c__agaricomycetes;o__agaricales;f__amanitaceae;g__amanita;s__amanita orientifulva;subclass agaricomycetidae;subkingdom__dikarya;superkingdom__eukaryota	0	0.00187255	0.00187719	0	0.00153435	0.00135347	0.0066235	0	0	0	0	0	0.00168788	0	0.00767651	0	0.00132165	0	0.00161436	0	0.00293161	0	0.0034046	0	0.0090313	0.00164549	0.00351309	0	0.00143841	0.00352734	0	0.00286714	0	0.00477152	0	0.00779241	0.000831864	0.00234538	0	0	0	0	0	0	0	0	0	0
OTU_537	___jn198528.1__gi:339715513_ ;k__fungi;p__ascomycota;c__leotiomycetes;o__leotiomycetes;f__leotiomycetes;g__xylogone;s__xylogone sphaerospora;superkingdom__eukaryota;subkingdom__dikarya;subphylum__pezizomycotina	0.0036207	0	0	0	0	0	0.00331175	0	0	0	0	0	0	0	0	0.00158929	0	0	0	0.00155778	0	0	0	0	0.00090313	0.00164549	0	0	0	0	0	0	0.00692425	0	0	0	0	0	0	0	0	0	0.00366076	0.00309876	0	0	0	0.00152828
OTU_538	fungal sp. ksl3 ;k__fungi;p__cryptomycota;c__cryptomycota;o__cryptomycota;f__cryptomycota;g__paramicrosporidium;s__fungal sp.;superkingdom__eukaryota	0.012069	0	0	0	0	0	0	0	0	0	0	0	0	0	0.0134339	0	0	0	0	0	0	0	0	0	0.0162563	0	0	0	0	0	0	0	0	0.00159051	0	0	0	0	0.00280749	0	0	0	0	0	0	0	0	0
OTU_539	cryptococcus terricola ;k__fungi;p__basidiomycota;c__tremellomycetes;o__filobasidiales;f__filobasidiales;g__cryptococcus;s__cryptococcus terricola;superkingdom__eukaryota;subkingdom__dikarya	0.0036207	0.00187255	0.00187719	0	0.00306871	0.00135347	0.00165588	0	0	0	0	0	0.00168788	0	0	0	0	0	0.00322872	0.00155778	0.0014658	0	0.00113487	0	0.00270939	0	0	0	0	0.00176367	0.00392395	0.00286714	0	0	0.00162771	0	0.00332745	0	0	0	0	0	0.00457595	0	0	0.00653424	0.00346446	0.00458484
OTU_542	___hq850353.1__gi:345647548_ ;k__fungi;p__ascomycota;c__eurotiomycetes;o__eurotiales;f__aspergillaceae;g__penicillium;s__penicillium sp.;subclass eurotiomycetidae;subphylum__pezizomycotina;subkingdom__dikarya;superkingdom__eukaryota	0	0.00374511	0.00187719	0.00247629	0	0	0.0066235	0	0.00764853	0	0	0	0.00168788	0	0.00383826	0	0	0	0.00161436	0.00155778	0.00293161	0	0	0	0	0	0.00702617	0	0	0.00176367	0	0	0	0	0	0	0	0.00234538	0.00280749	0	0.00193442	0.00135422	0	0	0	0	0.00173223	0
OTU_543	___ef634250.1__gi:157065132_ ;k__fungi;p__chytridiomycota;c__chytridiomycetes;o__rhizophydiales;f__rhizophydiales;g__coralloidiomyces;s__rhizophydiales sp.;superkingdom__eukaryota	0	0	0	0	0	0	0	0.00294295	0	0	0	0	0.00337576	0	0	0.00158929	0.00132165	0	0	0	0	0	0	0.00070278	0.00180626	0	0.00351309	0	0	0	0	0	0	0	0.00651084	0	0.000831864	0	0	0	0	0	0.00366076	0.00464814	0	0	0	0
OTU_544	spirosphaera minuta ;k__fungi;p__ascomycota;c__ascomycota;o__ascomycota;f__ascomycota;g__spirosphaera;s__spirosphaera minuta;superkingdom__eukaryota;subkingdom__dikarya	0	0	0.00187719	0	0	0	0	0	0	0	0	0	0	0.00976062	0	0	0	0	0	0	0.00732901	0	0	0	0	0	0	0	0	0	0	0	0	0	0	0	0	0	0	0	0	0	0	0	0	0	0	0.00152828
OTU_545	___af004686.1__gi:3493477_ ;k__fungi;p__glomeromycota;c__glomeromycetes;o__diversisporales;f__gigasporaceae;g__racocetra;s__scutellospora coralloidea;superkingdom__eukaryota	0	0	0	0	0	0	0	0	0	0	0	0	0	0	0	0	0	0	0	0	0	0	0	0	0	0	0	0	0	0	0	0	0	0	0	0	0	0	0	0	0	0	0	0	0	0	0	0
OTU_546	___ay046185.1__gi:31746843_ ;k__fungi;p__ascomycota;c__saccharomycetes;o__saccharomycetales;f__saccharomycetaceae;g__torulaspora;s__zygosaccharomyces microellipsoides;subphylum__saccharomycotina;subkingdom__dikarya;superkingdom__eukaryota	0.0024138	0.00374511	0.00375439	0	0	0	0.00165588	0	0.00305941	0	0.00221769	0	0	0.00244016	0	0	0	0.00125221	0	0.00311556	0.0014658	0.00163327	0.00113487	0	0	0	0	0	0.00143841	0.00352734	0	0	0	0.00795254	0	0.00311696	0.000831864	0.00234538	0	0	0	0.00270845	0.000915189	0.00464814	0.00482998	0	0.00173223	0
OTU_547	lambertella corni_maris ;k__fungi;p__ascomycota;c__leotiomycetes;o__helotiales;f__rutstroemiaceae;g__lambertella;s__lambertella corni_maris;subphylum__pezizomycotina;subkingdom__dikarya;superkingdom__eukaryota	0	0	0	0	0	0	0	0	0	0	0	0	0	0	0	0	0	0	0	0	0	0	0	0	0	0	0	0	0	0	0	0	0	0	0	0	0	0	0	0	0	0	0	0	0	0	0	0.131432
OTU_549	pseudeurotium sp. 02nh04 ;k__fungi;p__ascomycota;c__leotiomycetes;o__leotiomycetes;f__pseudeurotiaceae;g__pseudeurotium;s__pseudeurotium sp.;superkingdom__eukaryota;subkingdom__dikarya;subphylum__pezizomycotina	0.0036207	0.00374511	0.00375439	0	0.00153435	0	0.00496763	0.0058859	0.00152971	0	0	0	0	0.00488031	0	0.00317859	0	0	0.00322872	0.00311556	0.00439741	0	0	0	0.00361252	0.00493648	0	0	0.00575366	0.00352734	0.00392395	0.00860141	0.00230808	0.00159051	0.00651084	0.00311696	0.00499118	0	0	0	0	0.00135422	0.00274557	0.00464814	0.00724498	0.00435616	0.00866116	0.00611312
OTU_550	___hq608007.1__gi:312434485_ ;k__fungi;p__ascomycota;c__sordariomycetes;o__sordariales;f__chaetomiaceae;g__humicola;s__humicola sp.;subclass sordariomycetidae;subphylum__pezizomycotina;subkingdom__dikarya;superkingdom__eukaryota	0	0	0	0	0	0	0	0	0	0	0	0	0	0	0	0	0	0	0.00322872	0	0	0	0	0	0	0	0.14755	0	0	0	0	0.00286714	0	0	0.00162771	0	0	0	0	0	0	0	0	0	0	0	0	0
OTU_551	___ay923248.1__gi:63082044_ ;k__fungi;p__ascomycota;c__saccharomycetes;o__saccharomycetales;f__pichiaceae;g__kregervanrija;s__kregervanrija pseudodelftensis;subphylum__saccharomycotina;subkingdom__dikarya;superkingdom__eukaryota	0.0012069	0	0	0	0	0	0.00165588	0	0.126966	0	0	0	0	0	0	0	0	0	0	0	0	0	0	0.00070278	0	0	0	0	0	0	0	0	0	0	0	0	0	0	0	0	0	0	0	0	0	0	0	0
OTU_552	___fm955448.1__gi:282944064_ ;k__fungi;p__ascomycota;c__sordariomycetes;o__sordariales;f__lasiosphaeriaceae;g__cladorrhinum;s__cladorrhinum bulbillosum;subclass sordariomycetidae;subphylum__pezizomycotina;subkingdom__dikarya;superkingdom__eukaryota	0	0	0	0	0	0	0.00165588	0	0.00458912	0	0.0898164	0	0	0	0	0	0	0	0	0	0	0	0	0	0	0	0	0.00566647	0	0	0	0	0	0	0	0	0	0	0	0	0.00193442	0	0	0	0	0	0	0
OTU_553	___gu126456.1__gi:267822757_ ;k__fungi;p__ascomycota;c__saccharomycetes;o__saccharomycetales;f__saccharomycetales;g__candida;s__candida sp.;superkingdom__eukaryota;subkingdom__dikarya;subphylum__saccharomycotina	0.0108621	0.00561766	0	0	0.00153435	0	0.00496763	0	0.00305941	0	0.00110884	0	0.00506363	0.00732047	0	0	0	0.00250441	0.00807181	0.00311556	0.0014658	0	0	0	0	0	0	0	0	0.00705467	0.00588593	0.0114685	0	0	0.00325542	0.00155848	0.00249559	0.00234538	0	0	0	0	0.000915189	0	0	0	0.00346446	0.00305656
OTU_554	___hm989941.1__gi:304263446_ ;k__fungi;p__basidiomycota;c__agaricomycetes;o__polyporales;f__coriolaceae;g__coriolopsis;s__coriolopsis trogii;subkingdom__dikarya;superkingdom__eukaryota	0.0012069	0.00561766	0.00187719	0	0.00153435	0	0.00331175	0	0.00152971	0	0	0	0.00675151	0	0.00383826	0	0.00132165	0	0	0.00155778	0.0014658	0	0	0	0.00090313	0.00164549	0	0	0	0	0.00196198	0	0.00230808	0.00159051	0.00162771	0	0	0.00234538	0	0	0	0	0.000915189	0	0	0.00217808	0	0.00152828
OTU_555	___ef652085.1__gi:158535230_ ;k__fungi;p__ascomycota;c__eurotiomycetes;o__eurotiales;f__aspergillaceae;g__aspergillus;s__eurotium xerophilum;subclass eurotiomycetidae;subphylum__pezizomycotina;subkingdom__dikarya;superkingdom__eukaryota	0	0	0	0.0321918	0.0322214	0.0581993	0	0	0	0	0.00221769	0	0	0	0.00191913	0.00158929	0	0	0.00161436	0	0	0	0.00113487	0	0	0	0.00175654	0	0.00143841	0	0	0	0	0	0	0	0	0.00234538	0	0	0	0	0	0	0	0	0	0
OTU_556	___gu934520.1__gi:300676346_ ;k__fungi;p__ascomycota;c__sordariomycetes;o__hypocreales;f__hypocreales;g__eucasphaeria;s__eucasphaeria capensis;superkingdom__eukaryota;subkingdom__dikarya;subphylum__pezizomycotina;subclass hypocreomycetidae	0	0.00561766	0.00375439	0	0	0.00135347	0	0	0.00152971	0	0	0	0	0.0146409	0.00383826	0	0.00132165	0	0	0	0	0	0	0	0	0.00164549	0.00175654	0	0	0.00352734	0	0.00286714	0	0.00954305	0	0.00311696	0.00166373	0	0.00561498	0	0	0	0	0	0.00482998	0.00435616	0	0
OTU_557	___ab114223.1__gi:32480562_ ;k__fungi;p__ascomycota;c__sordariomycetes;o__hypocreales;f__clavicipitaceae;g__paecilomyces;s__paecilomyces marquandii;subclass hypocreomycetidae;subphylum__pezizomycotina;subkingdom__dikarya;superkingdom__eukaryota	0.00482759	0.00936277	0	0.00495258	0	0.00270695	0.00331175	0	0	0	0	0	0.0101273	0	0	0	0	0	0	0	0	0	0	0	0.00180626	0.00164549	0.00175654	0	0.00287683	0.00176367	0	0	0	0	0	0.00467545	0	0	0.00842247	0	0	0	0.00457595	0.00154938	0	0.00217808	0.00346446	0
OTU_559	___dq491504.1__gi:92430242_ ;k__fungi;p__ascomycota;c__pezizomycetes;o__pezizales;f__ascobolaceae;g__ascobolus;s__ascobolus crenulatus;subphylum__pezizomycotina;subkingdom__dikarya;superkingdom__eukaryota	0	0	0	0.00247629	0.00306871	0.00406042	0	0	0.00152971	0	0	0.002503	0	0	0	0	0	0	0	0	0	0	0	0	0	0	0	0	0	0	0	0	0	0	0	0	0	0	0	0	0	0.104275	0	0	0	0	0	0
OTU_560	___dq865097.1__gi:114704077_ ;k__fungi;p__ascomycota;c__ascomycota;o__ascomycota;f__ascomycota;g__aporospora;s__aporospora terricola;superkingdom__eukaryota;subkingdom__dikarya	0.0555173	0	0.00187719	0	0	0	0	0	0	0	0	0.0012515	0.0202545	0	0	0	0	0	0	0.00311556	0	0	0	0.00140556	0	0	0	0	0.00143841	0	0	0.00573427	0.00461617	0	0	0	0	0	0.00561498	0.00116054	0	0	0	0	0	0	0	0
OTU_561	octaviania nonae ;k__fungi;p__basidiomycota;c__agaricomycetes;o__boletales;f__boletaceae;g__octaviania;s__octaviania nonae;subgenus parcea;subfamily__leccinoideae;suborder__boletineae;subclass agaricomycetidae;subkingdom__dikarya;superkingdom__eukaryota	0	0.00561766	0.0244035	0	0	0.00135347	0.00827938	0.00147148	0	0	0	0.0012515	0.00168788	0.0219614	0.0134339	0	0.00132165	0	0.0129149	0	0.00293161	0.00163327	0	0.00070278	0.00451565	0	0	0	0	0	0	0.00286714	0	0	0	0	0.00166373	0	0	0	0	0	0.000915189	0.00464814	0.00241499	0.00435616	0	0.00152828
OTU_562	___dq189222.1__gi:76150856_ ;k__fungi;p__ascomycota;c__saccharomycetes;o__saccharomycetales;f__dipodascaceae;g__galactomyces;s__galactomyces geotrichum;subphylum__saccharomycotina;subkingdom__dikarya;superkingdom__eukaryota	0	0	0	0	0	0	0	0	0	0	0	0	0	0	0	0	0	0.00125221	0	0	0	0	0	0	0	0	0	0	0	0	0	0	0	0	0	0	0	0	0	0	0.00580327	0	0.000915189	0	0	0	0	0
OTU_564	___aj291800.1__gi:11933096_ ;k__fungi;p__ascomycota;c__sordariomycetes;o__hypocreales;f__clavicipitaceae;g__metacordyceps;s__metacordyceps chlamydosporia;subclass hypocreomycetidae;subphylum__pezizomycotina;subkingdom__dikarya;superkingdom__eukaryota	0.0012069	0	0	0.00742887	0	0	0.00165588	0.0058859	0	0	0	0	0	0.00244016	0	0	0	0	0	0	0.00732901	0	0	0	0	0	0	0	0	0	0	0.00573427	0	0	0	0	0	0	0.00561498	0	0	0	0.00274557	0	0	0.00217808	0.00173223	0
OTU_565	___jn040506.1__gi:347664822_ ;k__fungi;p__ascomycota;c__eurotiomycetes;o__chaetothyriales;f__trichomeriaceae;g__knufia;s__knufia perforans;subclass chaetothyriomycetidae;subphylum__pezizomycotina;subkingdom__dikarya;superkingdom__eukaryota	0.0012069	0	0.00187719	0.00247629	0	0	0	0.00147148	0.00458912	0	0	0	0.0101273	0.00244016	0	0	0	0.00125221	0.00322872	0	0.00293161	0	0	0	0.00090313	0	0.00175654	0	0	0.00881834	0.00588593	0	0	0	0	0	0.0091505	0	0	0.00116054	0	0	0	0	0	0	0.00346446	0
OTU_566	___ay667486.1__gi:50313401_ ;k__fungi;p__ascomycota;c__sordariomycetes;o__hypocreales;f__nectriaceae;g__fusarium;s__fusarium oxysporum;subclass hypocreomycetidae;subphylum__pezizomycotina;subkingdom__dikarya;superkingdom__eukaryota	0.00603449	0.00374511	0.00187719	0.00247629	0	0.00270695	0.00165588	0	0	0.00904855	0.00110884	0.00500601	0.00168788	0	0	0.00476788	0.00396495	0.00626104	0.00161436	0.00155778	0.00293161	0.00326653	0.00794407	0.0035139	0.00090313	0.00164549	0.00175654	0.00566647	0	0	0	0	0	0	0	0	0	0	0	0	0	0.0054169	0.00457595	0.00464814	0.00724498	0.00217808	0.00519669	0.00305656
OTU_567	___ay664502.1__gi:50511742_ ;k__fungi;p__ascomycota;c__leotiomycetes;o__helotiales;f__helotiales;g__phialocephala;s__phialocephala fortinii;superkingdom__eukaryota;subkingdom__dikarya;subphylum__pezizomycotina	0	0	0	0	0	0	0	0.00294295	0	0	0.00110884	0	0	0.00732047	0	0	0	0	0	0	0	0	0	0.00070278	0	0	0	0.00188882	0	0	0.00980988	0	0	0	0	0	0	0.0445622	0	0	0	0	0	0	0	0	0	0
OTU_568	___fj903285.1__gi:237641504_ ;k__fungi;p__ascomycota;c__leotiomycetes;o__leotiomycetes;f__pseudeurotiaceae;g__pseudeurotium;s__pseudeurotium bakeri;superkingdom__eukaryota;subkingdom__dikarya;subphylum__pezizomycotina	0.0036207	0.00187255	0.00375439	0.00247629	0	0	0.00165588	0.00147148	0.00152971	0	0	0	0.00337576	0	0.00191913	0	0	0	0.00161436	0.00155778	0.0014658	0	0	0	0.00632191	0	0	0	0.00287683	0.00529101	0.00392395	0.00573427	0.00230808	0.00477152	0.00162771	0.00155848	0	0	0.00280749	0	0	0	0.00549114	0.00309876	0.00241499	0.00653424	0	0
OTU_569	megalospora sulphurata ;k__fungi;p__ascomycota;c__lecanoromycetes;o__teloschistales;f__megalosporaceae;g__megalospora;s__megalospora sulphurata;suborder__teloschistineae;subclass lecanoromycetidae;subphylum__pezizomycotina;subkingdom__dikarya;superkingdom__eukaryota	0	0.00561766	0.00563158	0.00247629	0	0	0.00165588	0	0.00152971	0	0.00110884	0	0	0.00244016	0.00191913	0	0.00132165	0	0	0	0.00293161	0	0	0	0	0.00493648	0.00351309	0	0	0	0	0.0114685	0.00923233	0	0.00162771	0	0	0.00234538	0.00280749	0	0	0	0	0	0.00241499	0.00435616	0.00173223	0
OTU_570	___fj210592.1__gi:226442186_ ;k__fungi;p__ascomycota;c__sordariomycetes;o__hypocreales;f__nectriaceae;g__fusarium;s__fusarium sp.;subclass hypocreomycetidae;subphylum__pezizomycotina;subkingdom__dikarya;superkingdom__eukaryota	0.0036207	0	0.00187719	0.0668598	0.0552368	0.0690271	0.00165588	0.0117718	0	0.00226214	0	0	0	0	0.00383826	0.00794647	0	0.00375662	0.00322872	0	0	0.000816633	0.00567434	0.00210834	0.00541878	0	0	0.00188882	0	0	0	0	0	0	0	0	0	0	0	0	0	0	0	0.00154938	0	0.00217808	0.00346446	0.0076414
OTU_571	___aj301966.1__gi:17426919_ ;k__fungi;p__ascomycota;c__sordariomycetes;o__hypocreales;f__nectriaceae;g__volutella;s__volutella ciliata;subclass hypocreomycetidae;subphylum__pezizomycotina;subkingdom__dikarya;superkingdom__eukaryota;	0.0024138	0.00374511	0.00938597	0	0.00153435	0	0.00165588	0	0.00458912	0.00226214	0.00110884	0	0	0	0	0	0.00132165	0.00125221	0.00161436	0.00311556	0.0014658	0.00163327	0.00113487	0.00070278	0	0	0	0.00377765	0.00143841	0	0.00196198	0.00286714	0	0	0	0	0.000831864	0.00234538	0.00280749	0	0	0	0.00274557	0.00309876	0.00965997	0.00435616	0.00173223	0
OTU_573	___gq340557.1__gi:260986216_ ;k__fungi;p__ascomycota;c__eurotiomycetes;o__eurotiales;f__aspergillaceae;g__aspergillus;s__aspergillus parasiticus;subclass eurotiomycetidae;subphylum__pezizomycotina;subkingdom__dikarya;superkingdom__eukaryota	0	0	0	0.00742887	0.0245497	0.00947431	0	0	0.00152971	0.016966	0.00443538	0.00750901	0	0	0	0.00953577	0.00660825	0	0	0	0.0014658	0	0	0.00070278	0	0	0	0.00188882	0.0158226	0	0	0	0	0	0	0.00155848	0	0	0	0.00116054	0.00580327	0	0	0	0	0	0	0
OTU_575	___ab007685.1__gi:4586365_ ;k__fungi;p__ascomycota;c__eurotiomycetes;o__chaetothyriales;f__herpotrichiellaceae;g__exophiala;s__exophiala calicioides;subclass chaetothyriomycetidae;subphylum__pezizomycotina;subkingdom__dikarya;superkingdom__eukaryota	0.0024138	0.00187255	0.00187719	0	0	0.00135347	0	0	0	0	0	0	0	0	0	0	0	0	0.00161436	0	0	0	0	0	0.00270939	0	0	0	0	0	0.00196198	0.00286714	0	0	0	0	0.000831864	0	0	0	0	0	0	0	0	0	0	0.00305656
OTU_576	fusarium sp. cp_8 ;k__fungi;p__ascomycota;c__sordariomycetes;o__hypocreales;f__nectriaceae;g__fusarium;s__fusarium sp.;subclass hypocreomycetidae;subphylum__pezizomycotina;subkingdom__dikarya;superkingdom__eukaryota	0	0	0	0	0	0	0	0	0	0.0033932	0	0	0	0	0	0.00953577	0.00132165	0.00375662	0	0	0	0.00163327	0.00226974	0	0	0	0.00175654	0	0	0	0	0	0	0	0	0	0	0	0	0	0	0	0	0	0	0	0	0
OTU_578	___eu622846.1__gi:187671973_ ;k__fungi;p__basidiomycota;c__agaricomycetes;o__corticiales;f__corticiaceae;g__limonomyces;s__limonomyces roseipellis;subkingdom__dikarya;superkingdom__eukaryota	0	0.00561766	0.00750878	0	0.00153435	0	0	0	0	0	0	0	0	0	0	0	0.00396495	0	0	0.0109044	0	0	0	0	0.00993443	0	0	0	0	0	0.0176578	0	0	0	0	0	0	0.00469076	0.00842247	0.00116054	0	0	0	0.012395	0	0	0	0
OTU_579	___aj279485.1__gi:6706273_ ;k__fungi;p__ascomycota;c__sordariomycetes;o__xylariales;f__xylariales;g__microdochium;s__microdochium sp.;superkingdom__eukaryota;subkingdom__dikarya;subphylum__pezizomycotina;subclass xylariomycetidae	0.0024138	0	0	0	0	0	0	0	0	0	0	0	0	0	0.00191913	0.00158929	0.00132165	0	0.00322872	0	0	0	0	0	0.00180626	0	0	0	0	0	0	0.00286714	0	0.00159051	0	0	0	0	0	0	0	0	0	0	0	0.0217808	0.0138579	0.00152828
OTU_581	___fj441035.1__gi:215254273_ ;k__fungi;p__basidiomycota;c__agaricomycetes;o__agaricales;f__amanitaceae;g__amanita;s__amanita orientifulva;subclass agaricomycetidae;subkingdom__dikarya;superkingdom__eukaryota	0.0024138	0	0.00563158	0	0	0	0	0	0.00305941	0	0	0	0	0	0.00575738	0	0	0.00125221	0	0.00155778	0.0014658	0	0	0	0.00270939	0	0	0	0.00575366	0	0	0	0.00461617	0.00159051	0.00488313	0	0.000831864	0	0.00561498	0	0	0	0.00183038	0	0	0	0	0.00152828
OTU_583	___af310977.1__gi:17834065_ ;k__fungi;p__ascomycota;c__sordariomycetes;o__hypocreales;f__nectriaceae;g__fusarium;s__fusarium sp.;subclass hypocreomycetidae;subphylum__pezizomycotina;subkingdom__dikarya;superkingdom__eukaryota	0	0	0	0.00742887	0.00613742	0.00541389	0.0066235	0	0	0.00452427	0.00221769	0.0012515	0	0	0.00383826	0	0	0	0.0129149	0	0	0.000816633	0.0034046	0.00140556	0	0.00164549	0.00175654	0	0.00143841	0	0	0	0	0	0	0	0.000831864	0.00469076	0	0	0	0	0	0	0	0	0	0
OTU_584	___ef187911.1__gi:122892466_ ;k__fungi;p__basidiomycota;c__agaricomycetes;o__agaricales;f__marasmiaceae;g__marasmius;s__marasmius oreades;subclass agaricomycetidae;subkingdom__dikarya;superkingdom__eukaryota	0	0	0	0	0	0	0	0	0.00152971	0	0.0776191	0	0	0	0	0	0	0.00125221	0	0	0.00293161	0	0	0	0.00090313	0	0	0	0	0	0	0	0	0	0	0	0	0	0	0	0	0	0	0	0	0	0	0
OTU_585	___ab032681.1__gi:7262501_ ;k__fungi;p__basidiomycota;c__tremellomycetes;o__filobasidiales;f__filobasidiales;g__cryptococcus;s__cryptococcus terreus;superkingdom__eukaryota;subkingdom__dikarya	0.0024138	0	0.00375439	0	0	0	0.00496763	0.00147148	0	0.00113107	0	0.0012515	0.00506363	0.00244016	0.00191913	0	0	0	0.00484308	0.00155778	0.00293161	0	0.0034046	0	0	0	0	0	0	0	0.00196198	0	0.00230808	0.00318102	0.00162771	0	0.000831864	0	0.00280749	0	0	0	0	0.00154938	0.00241499	0.00217808	0	0.00152828
OTU_586	___ay999121.1__gi:67644096_ ;k__fungi;p__ascomycota;c__sordariomycetes;o__sordariales;f__lasiosphaeriaceae;g__podospora;s__podospora intestinacea;subclass sordariomycetidae;subphylum__pezizomycotina;subkingdom__dikarya;superkingdom__eukaryota	0	0	0	0	0	0	0	0	0	0	0.00110884	0	0	0	0	0	0	0	0	0	0	0	0	0	0	0	0	0	0	0	0	0.00286714	0	0	0	0.00467545	0	0	0	0	0	0	0	0	0	0.00217808	0	0
OTU_587	___ay061726.1__gi:22024505_ ;k__fungi;p__basidiomycota;c__agaricomycetes;o__russulales;f__russulaceae;g__russula;s__russula violeipes;subkingdom__dikarya;superkingdom__eukaryota	0	0.00187255	0	0	0	0.00135347	0.00165588	0	0.0244753	0	0	0	0.00168788	0	0	0	0.0026433	0	0	0	0	0	0	0	0	0	0	0	0	0	0	0	0	0	0	0	0.0158054	0	0	0	0	0	0	0	0	0	0	0
OTU_588	___jf735262.1__gi:345447605_ ;k__fungi;p__ascomycota;c__sordariomycetes;o__hypocreales;f__nectriaceae;g__ilyonectria;s__ilyonectria liriodendri;subclass hypocreomycetidae;subphylum__pezizomycotina;subkingdom__dikarya;superkingdom__eukaryota	0	0.00187255	0	0.00495258	0	0	0	0	0	0.00113107	0	0.012515	0	0	0	0.00158929	0	0	0	0.00155778	0.0014658	0.00163327	0	0	0	0	0	0	0	0.00352734	0.00196198	0	0	0	0	0	0.000831864	0.00703614	0	0	0	0	0	0	0	0	0	0.00152828
OTU_589	___dq536497.1__gi:108744684_ ;k__fungi;p__chytridiomycota;c__chytridiomycetes;o__rhizophydiales;f__rhizophydiaceae;g__rhizophydium;s__rhizophydium sp.;superkingdom__eukaryota	0.00844829	0	0	0	0	0	0	0	0	0	0	0	0	0	0.00191913	0	0	0	0	0	0	0	0	0	0	0.00164549	0.00351309	0	0	0	0	0	0	0	0.00325542	0	0	0	0	0	0	0	0	0	0.00241499	0	0	0
OTU_590	___dq018098.1__gi:65330202_ ;k__fungi;p__ascomycota;c__ascomycota;o__ascomycota;f__ascomycota;g__pseudodictyosporium;s__pseudodictyosporium wauense;superkingdom__eukaryota;subkingdom__dikarya	0	0.0224706	0	0.00247629	0.00920613	0	0.0182146	0	0	0	0	0.0012515	0.00506363	0	0	0	0.00132165	0	0	0	0	0	0	0	0.00451565	0.00164549	0	0	0.00143841	0	0	0.0143357	0	0	0	0	0.00249559	0	0.00280749	0	0	0	0	0	0	0.00217808	0	0
OTU_591	___fm876820.1__gi:229359266_ ;k__fungi;p__glomeromycota;c__glomeromycetes;o__glomerales;f__glomeraceae;g__glomus;s__glomus versiforme;superkingdom__eukaryota	0.00482759	0	0	0	0	0.00135347	0	0.00147148	0	0	0	0	0.00168788	0	0	0	0.00132165	0	0	0	0.0014658	0	0	0	0	0.00164549	0	0	0	0	0	0	0	0	0	0	0.00415932	0	0	0	0	0	0	0	0	0	0	0
OTU_592	___gu553291.1__gi:292454288_ ;k__fungi;p__ascomycota;c__lecanoromycetes;o__lecanoromycetidae;f__physciaceae;g__rinodina;s__rinodina bischoffii;superkingdom__eukaryota;subkingdom__dikarya;subphylum__pezizomycotina;subclass lecanoromycetidae;suborder__caliciales	0	0.00561766	0	0	0	0	0	0	0	0	0	0	0	0	0	0	0	0	0	0	0	0	0	0	0	0	0	0	0	0	0	0	0	0	0	0	0.000831864	0	0.00842247	0	0	0	0.00183038	0	0.00241499	0.00217808	0	0
OTU_593	___dq536497.1__gi:108744684_ ;k__fungi;p__chytridiomycota;c__chytridiomycetes;o__rhizophydiales;f__rhizophydiaceae;g__rhizophydium;s__rhizophydium sp.;superkingdom__eukaryota	0.0156897	0.00187255	0	0.00247629	0.00153435	0.00270695	0	0	0.00152971	0	0	0	0.0371333	0	0.00191913	0	0.0026433	0	0	0	0	0	0	0	0	0	0	0	0	0	0	0	0	0	0	0	0	0	0	0	0	0	0	0	0	0	0	0
OTU_594	alternaria alternata ;k__fungi;p__ascomycota;c__dothideomycetes;o__pleosporales;f__pleosporaceae;g__alternaria;s__alternaria alternata;suborder__pleosporineae;subclass pleosporomycetidae;subphylum__pezizomycotina;subkingdom__dikarya;superkingdom__eukaryota	0	0	0	0	0	0.00135347	0.0115911	0.00147148	0	0	0	0	0	0.00244016	0	0	0	0	0.0161436	0	0	0	0	0	0.00090313	0	0	0	0	0	0	0	0	0	0	0	0.0415932	0	0	0	0	0	0	0	0	0	0	0
OTU_595	___ay729065.1__gi:53771791_ ;k__fungi;p__ascomycota;c__sordariomycetes;o__hypocreales;f__nectriaceae;g__fusarium;s__fusarium sp.;subclass hypocreomycetidae;subphylum__pezizomycotina;subkingdom__dikarya;superkingdom__eukaryota	0.00603449	0.00936277	0.00563158	0.00495258	0.00153435	0	0.0182146	0.0117718	0.00764853	0.00791748	0.00332653	0.00625751	0.00506363	0.00244016	0.00383826	0.0111251	0.0026433	0.00375662	0	0.00467333	0.0014658	0.00408317	0.0102138	0.0780086	0.00541878	0.00329099	0.00526963	0.0188882	0.00287683	0.00176367	0	0	0.00230808	0	0	0.00155848	0	0	0	0	0	0.0216676	0.0137278	0.00929627	0.00241499	0.0130685	0.0173223	0.0244525
OTU_596	___eu352771.1__gi:164421752_ ;k__fungi;p__chytridiomycota;c__chytridiomycetes;o__lobulomycetales;f__lobulomycetaceae;g__lobulomyces;s__lobulomyces poculatus;superkingdom__eukaryota	0	0.00187255	0	0.00247629	0	0.00135347	0	0	0	0	0	0	0	0	0	0	0	0	0	0	0	0	0	0	0.0090313	0	0	0	0	0	0	0	0.0115404	0	0.0748747	0.00155848	0	0	0	0	0	0	0	0	0	0	0	0
OTU_597	___jf439488.1__gi:328923738_ ;k__fungi;p__fungi;c__mortierellomycotina;o__mortierellales;f__mortierellaceae;g__mortierella;s__mortierella sp.;superkingdom__eukaryota;subphylum__mortierellomycotina	0.083276	0.101118	0.0750878	0.0198103	0.021481	0.0460181	0.105976	0.0941744	0.0810745	0.0565534	0.0255034	0.0713356	0.102961	0.0414826	0.059493	0.0985363	0.0251113	0.115203	0.0710319	0.08412	0.126059	0.0097996	0.0317763	0.00210834	0.127341	0.0625288	0.0790444	0.0169994	0.0517829	0.0352734	0.0588593	0.0688113	0.0692425	0.0318102	0.00813855	0.0529884	0.104815	0.131341	0.103877	0.00116054	0.00193442	0.0054169	0.0521658	0.0356357	0.0579598	0.0871232	0.0796827	0.0916969
OTU_598	___hq650696.1__gi:336397109_ ;k__fungi;p__ascomycota;c__lecanoromycetes;o__peltigerales;f__lobariaceae;g__lobariella;s__lobariella pallida;suborder__peltigerineae;subclass lecanoromycetidae;subphylum__pezizomycotina;subkingdom__dikarya;superkingdom__eukaryota	0.0036207	0	0	0	0	0	0	0.00441443	0.00305941	0	0	0	0	0	0.00191913	0	0.00132165	0.00125221	0.00161436	0	0.00586321	0	0	0	0.00361252	0	0.00175654	0	0.00287683	0.00529101	0	0.00286714	0.00461617	0	0	0	0.00249559	0.00234538	0	0	0	0	0.0118975	0.00154938	0	0.00217808	0	0
OTU_599	___hq897787.1__gi:339739815_ ;k__fungi;p__ascomycota;c__sordariomycetes;o__hypocreales;f__nectriaceae;g__fusarium;s__fusarium sp.;subclass hypocreomycetidae;subphylum__pezizomycotina;subkingdom__dikarya;superkingdom__eukaryota	0.00482759	0	0	0	0.00306871	0.00135347	0	0.00294295	0	0	0.00221769	0	0	0	0	0.00158929	0	0.00375662	0	0	0	0.000816633	0	0	0.00090313	0	0	0	0	0	0	0	0	0	0	0	0	0	0	0	0	0	0.00640633	0	0	0	0.00346446	0
OTU_600	___fm876805.1__gi:229359251_ ;k__fungi;p__glomeromycota;c__glomeromycetes;o__glomerales;f__glomeraceae;g__glomus;s__glomus sp.;superkingdom__eukaryota	0.0024138	0.00374511	0.00375439	0	0	0.00135347	0.00331175	0.00294295	0	0.00113107	0	0.0012515	0.00168788	0	0.00383826	0	0	0	0.00484308	0.00311556	0	0	0	0	0.00090313	0	0	0	0.00143841	0.00352734	0.00392395	0	0	0	0	0.00155848	0.00166373	0	0	0	0	0	0.000915189	0.00154938	0	0	0.00346446	0.00152828
OTU_601	___z48816.1__gi:1771822_ ;k__fungi;p__ascomycota;c__sordariomycetes;o__hypocreales;f__hypocreaceae;g__trichoderma;s__trichoderma hamatum;subclass hypocreomycetidae;subphylum__pezizomycotina;subkingdom__dikarya;superkingdom__eukaryota	0	0	0	0	0	0	0.00331175	0	0.00305941	0.0033932	0	0.002503	0.00168788	0	0	0.00158929	0	0	0	0.00155778	0.00293161	0.000816633	0.0034046	0	0.00090313	0.00164549	0.00351309	0.00188882	0	0.00352734	0.00196198	0	0	0.00159051	0	0	0.000831864	0.00234538	0	0.00116054	0	0	0.00183038	0	0	0	0.00519669	0
OTU_602	___jf439142.1__gi:344165586_ ;k__fungi;p__glomeromycota;c__glomeromycetes;o__glomerales;f__glomeraceae;g__glomus;s__glomus sp.;superkingdom__eukaryota	0	0	0	0	0	0.00135347	0.0066235	0.00294295	0.00305941	0	0	0	0.00337576	0	0	0	0	0	0	0	0	0	0	0	0.00361252	0.00164549	0.00175654	0	0.00143841	0	0	0.00286714	0	0	0.00162771	0	0.000831864	0	0	0	0	0	0	0.00154938	0	0	0	0.00152828
OTU_603	___jf908003.1__gi:344332962_ ;k__fungi;p__basidiomycota;c__agaricomycetes;o__agaricales;f__entolomataceae;g__entoloma;s__entoloma platyphylloides;subclass agaricomycetidae;subkingdom__dikarya;superkingdom__eukaryota	0	0	0	0	0	0	0.00165588	0.0191292	0.00152971	0	0	0	0	0.00488031	0	0	0	0	0	0.00155778	0	0	0	0	0	0.0115185	0	0	0	0	0	0	0.00692425	0	0.00162771	0	0.000831864	0	0	0	0	0	0	0	0	0	0	0
OTU_604	___af383963.1__gi:14579569_ ;k__fungi;p__ascomycota;c__dothideomycetes;o__pleosporales;f__massarinaceae;g__massarina;s__massarina rubi;suborder__massarineae;subclass pleosporomycetidae;subphylum__pezizomycotina;subkingdom__dikarya;superkingdom__eukaryota	0	0	0	0	0	0	0	0	0	0	0	0	0	0	0	0	0	0	0.00161436	0	0.00293161	0	0	0	0	0.00164549	0.00351309	0	0	0	0	0	0.00230808	0	0.0146494	0.00155848	0	0	0	0	0	0	0	0	0	0.00435616	0.00346446	0
OTU_605	___aj269851.1__gi:317416175_ ;k__fungi;p__ascomycota;c__sordariomycetes;o__hypocreales;f__nectriaceae;g__nectria;s__nectria sp.;subclass hypocreomycetidae;subphylum__pezizomycotina;subkingdom__dikarya;superkingdom__eukaryota	0	0.00187255	0.00563158	0	0	0.00406042	0	0	0.00305941	0.00113107	0	0	0.00168788	0.00244016	0.00959564	0	0	0.00125221	0.00484308	0.00155778	0.00439741	0.000816633	0.00113487	0	0	0.00987297	0	0	0.00143841	0.00176367	0	0.00573427	0.00230808	0.00159051	0.00162771	0	0	0	0.00842247	0	0	0	0	0.00309876	0	0	0.00173223	0.00458484
OTU_606	___gq249890.1__gi:240003295_ ;k__fungi;p__fungi;c__mucoromycotina;o__mucorales;f__lichtheimiaceae;g__fennellomyces;s__fennellomyces linderi;superkingdom__eukaryota;subphylum__mucoromycotina	0.00482759	0.123589	0	0	0.00153435	0	0.0248381	0	0.00305941	0	0	0	0	0	0	0	0	0	0	0	0	0	0	0	0	0	0	0	0	0	0	0	0	0.00159051	0	0	0	0.00234538	0	0.00116054	0	0	0.000915189	0	0	0	0	0
OTU_607	___dq189222.1__gi:76150856_ ;k__fungi;p__ascomycota;c__saccharomycetes;o__saccharomycetales;f__dipodascaceae;g__galactomyces;s__galactomyces geotrichum;subphylum__saccharomycotina;subkingdom__dikarya;superkingdom__eukaryota	0	0	0	0	0	0	0	0	0	0	0	0.0012515	0	0	0	0	0	0.00125221	0	0	0	0	0	0	0	0	0.00175654	0.00188882	0	0	0	0	0	0	0	0	0	0	0	0.0092843	0.00967212	0	0	0	0	0	0	0
OTU_608	___hq897790.1__gi:339739818_ ;k__fungi;p__ascomycota;c__sordariomycetes;o__hypocreales;f__nectriaceae;g__fusicolla;s__fusicolla acetilerea;subclass hypocreomycetidae;subphylum__pezizomycotina;subkingdom__dikarya;superkingdom__eukaryota	0	0	0	0	0	0	0	0	0.00458912	0	0	0	0	0	0	0	0	0.00375662	0	0	0	0	0	0	0	0	0	0	0	0	0	0	0.00230808	0	0	0	0	0	0	0	0	0	0	0	0.00241499	0	0	0
OTU_609	veronaea botryosa ;k__fungi;p__ascomycota;c__eurotiomycetes;o__chaetothyriales;f__herpotrichiellaceae;g__veronaea;s__veronaea botryosa;subclass chaetothyriomycetidae;subphylum__pezizomycotina;subkingdom__dikarya;superkingdom__eukaryota	0	0	0	0	0	0.00406042	0	0	0.00917824	0	0	0	0	0	0	0	0	0	0	0.01402	0	0	0.00113487	0	0	0	0.00878272	0	0	0.00176367	0	0	0	0	0	0	0	0	0	0	0	0	0	0	0	0	0	0.00305656
OTU_610	___hq542921.1__gi:353741788_ ;k__fungi;p__fungi;c__kickxellomycotina;o__kickxellales;f__kickxellaceae;g__ramicandelaber;s__ramicandelaber longisporus;superkingdom__eukaryota;subphylum__kickxellomycotina	0.00965519	0	0.00563158	0.00247629	0.00153435	0.00270695	0.00331175	0.00147148	0.00458912	0	0.00221769	0	0.00168788	0.00244016	0.00767651	0	0	0	0.00161436	0.00155778	0.0014658	0	0	0	0.00993443	0	0	0	0	0	0.00392395	0	0.00461617	0	0	0	0.00166373	0.00469076	0.00280749	0	0	0	0	0	0	0	0	0
OTU_611	lecythophora sp. kw448 ;k__fungi;p__ascomycota;c__sordariomycetes;o__coniochaetales;f__coniochaetaceae;g__coniochaeta;s__lecythophora sp.;subclass sordariomycetidae;subphylum__pezizomycotina;subkingdom__dikarya;superkingdom__eukaryota	0	0	0	0	0	0	0.00165588	0	0	0	0	0	0	0	0	0	0	0	0	0.00155778	0	0	0	0	0	0	0	0	0	0.00176367	0	0	0.00230808	0	0	0	0.000831864	0	0	0	0.00193442	0.0826077	0	0	0	0	0	0
OTU_612	chamaeleomyces granulomatis ;k__fungi;p__ascomycota;c__sordariomycetes;o__hypocreales;f__clavicipitaceae;g__chamaeleomyces;s__chamaeleomyces granulomatis;subclass hypocreomycetidae;subphylum__pezizomycotina;subkingdom__dikarya;superkingdom__eukaryota	0	0.00561766	0	0	0	0.00135347	0	0.00147148	0	0	0	0	0.00168788	0	0.00191913	0.00158929	0	0	0	0	0	0	0	0	0.00993443	0	0	0	0.00143841	0.00529101	0	0	0	0	0	0	0.000831864	0	0	0	0	0	0	0	0	0	0	0.00152828
OTU_613	___fj477044.1__gi:229503984_ ;k__fungi;p__ascomycota;c__orbiliomycetes;o__orbiliales;f__orbiliaceae;g__dactylella;s__dactylella alba;subphylum__pezizomycotina;subkingdom__dikarya;superkingdom__eukaryota	0	0	0	0	0	0	0	0	0	0	0	0	0	0	0	0	0	0	0	0	0	0	0	0	0	0	0	0	0	0	0	0	0	0	0	0	0	0	0	0	0	0	0	0	0	0	0	0
OTU_614	___ay729070.1__gi:53771796_ ;k__fungi;p__ascomycota;c__sordariomycetes;o__hypocreales;f__nectriaceae;g__fusarium;s__fusarium sp.;subclass hypocreomycetidae;subphylum__pezizomycotina;subkingdom__dikarya;superkingdom__eukaryota	0.0024138	0.00561766	0.00187719	0.00247629	0.00306871	0.00270695	0.0066235	0.00147148	0	0.00904855	0.00221769	0.00375451	0.00168788	0.00244016	0	0.00794647	0.0026433	0.00375662	0	0	0	0.0048998	0.017023	0.0196778	0	0.00164549	0	0.0075553	0	0.00176367	0	0	0	0	0.00162771	0	0.000831864	0	0	0	0	0.0203134	0.00457595	0.0154938	0.0169049	0.0108904	0.022519	0.010698
OTU_615	mortierella sp. 11ma04 ;k__fungi;p__fungi;c__mortierellomycotina;o__mortierellales;f__mortierellaceae;g__mortierella;s__mortierella sp.;superkingdom__eukaryota;subphylum__mortierellomycotina	0	0.00187255	0.00375439	0	0	0	0.00165588	0	0.00152971	0	0	0.0012515	0.00337576	0.00244016	0.00383826	0	0.0026433	0	0.00161436	0.00311556	0.00293161	0	0	0	0	0	0	0.00188882	0	0.00176367	0	0.00286714	0.00230808	0.00318102	0.00162771	0	0.00166373	0.00234538	0.00280749	0	0	0	0.000915189	0.00309876	0	0.00217808	0.00346446	0.00458484
OTU_616	___ay997057.1__gi:62866663_ ;k__fungi;p__fungi;c__zoopagomycotina;o__zoopagales;f__piptocephalidaceae;g__kuzuhaea;s__kuzuhaea moniliformis;superkingdom__eukaryota;subphylum__zoopagomycotina	0	0	0	0	0	0	0.00165588	0	0	0	0	0	0	0	0	0	0	0	0	0.0327133	0	0	0	0	0	0	0	0	0	0	0	0	0	0	0	0	0	0	0	0	0	0	0	0	0	0	0	0
OTU_617	armillaria mellea ;k__fungi;p__basidiomycota;c__agaricomycetes;o__agaricales;f__physalacriaceae;g__armillaria;s__armillaria mellea;subclass agaricomycetidae;subkingdom__dikarya;superkingdom__eukaryota	0.0024138	0	0.00187719	0	0	0	0.00331175	0	0.00152971	0	0	0	0	0.00244016	0	0	0	0	0	0	0.00879482	0	0	0	0	0	0	0	0	0	0	0.00286714	0	0	0	0	0	0	0	0	0	0	0.00183038	0.00619751	0.00241499	0	0.00346446	0.00152828
OTU_619	___hq631039.1__gi:317383360_ ;k__fungi;p__ascomycota;c__sordariomycetes;o__sordariales;f__lasiosphaeriaceae;g__cercophora;s__cercophora sp.;subclass sordariomycetidae;subphylum__pezizomycotina;subkingdom__dikarya;superkingdom__eukaryota	0	0	0	0	0	0	0	0	0	0	0	0	0	0	0	0	0	0	0	0	0	0	0	0	0	0	0	0	0	0	0	0	0	0	0	0	0	0	0	0	0	0	0	0	0	0	0	0
OTU_620	___eu620166.1__gi:187424565_ ;k__fungi;p__ascomycota;c__sordariomycetes;o__sordariales;f__chaetomiaceae;g__thielavia;s__thielavia sp.;subclass sordariomycetidae;subphylum__pezizomycotina;subkingdom__dikarya;superkingdom__eukaryota	0	0	0	0	0	0.00135347	0	0	0	0.00113107	0	0	0	0	0	0.00158929	0	0	0	0	0	0	0	0	0	0	0.0140523	0.0188882	0.00143841	0	0	0	0	0	0	0	0.000831864	0	0	0	0	0	0	0	0.00241499	0	0	0
OTU_622	___eu284099.1__gi:161778845_ ;k__fungi;p__ascomycota;c__saccharomycetes;o__saccharomycetales;f__saccharomycetales;g__candida;s__candida sp.;superkingdom__eukaryota;subkingdom__dikarya;subphylum__saccharomycotina	0	0	0	0.00247629	0.00153435	0	0	0	0	0	0.00110884	0	0	0.0366023	0	0	0	0	0	0.00155778	0	0	0	0	0	0	0	0	0.00143841	0	0	0	0	0.00159051	0.00162771	0.0187018	0	0	0	0	0	0	0	0	0	0	0	0.00458484
OTU_623	___fj827711.1__gi:268636569_ ;k__fungi;p__chytridiomycota;c__chytridiomycetes;o__spizellomycetales;f__powellomycetaceae;g__powellomyces;s__powellomyces hirtus;superkingdom__eukaryota	0	0	0.00187719	0	0	0	0	0	0	0	0	0	0	0	0	0	0	0	0	0	0	0	0	0	0	0	0	0	0	0.00176367	0	0.00573427	0	0	0	0	0	0	0	0	0	0	0	0	0.0193199	0.0152466	0	0
OTU_624	massarina corticola ;k__fungi;p__ascomycota;c__dothideomycetes;o__pleosporales;f__massarinaceae;g__massarina;s__massarina corticola;suborder__massarineae;subclass pleosporomycetidae;subphylum__pezizomycotina;subkingdom__dikarya;superkingdom__eukaryota	0.0012069	0.00187255	0	0	0	0.00135347	0	0.00147148	0	0	0	0	0	0	0	0	0	0	0	0	0.00293161	0	0	0	0	0.00164549	0.00175654	0	0	0	0.00196198	0	0	0	0.00162771	0.00311696	0	0	0	0	0	0	0.00183038	0.00154938	0.00482998	0	0	0
OTU_625	___aj279445.1__gi:6706190_ ;k__fungi;p__ascomycota;c__saccharomycetes;o__saccharomycetales;f__dipodascaceae;g__galactomyces;s__galactomyces geotrichum;subphylum__saccharomycotina;subkingdom__dikarya;superkingdom__eukaryota	0.0108621	0.00187255	0.00187719	0.00495258	0.00920613	0.00676737	0.013247	0.0117718	0.0152971	0.00791748	0.0110884	0.020024	0.00337576	0.0122008	0.0134339	0.00953577	0.0052866	0.00626104	0.00322872	0.00623111	0.00732901	0.0620641	0.0249671	0.00491946	0.00722504	0.00164549	0.00351309	0.0113329	0.00863049	0.00881834	0.0117719	0.00860141	0.00461617	0.00795254	0.011394	0.0358451	0.0108142	0.00234538	0.00561498	2.4731	0.690589	0.00677112	0.00366076	0.00464814	0	0	0.00173223	0.00152828
OTU_627	___dq485617.1__gi:94995469_ ;k__fungi;p__chytridiomycota;c__chytridiomycetes;o__rhizophydiales;f__rhizophydiales;g__operculomyces;s__rhizophydium sp.;superkingdom__eukaryota	0.0012069	0	0	0	0	0	0	0	0	0	0	0	0	0	0.00959564	0	0	0	0	0	0	0	0	0	0.0325127	0	0.00175654	0.00188882	0	0	0	0	0	0	0	0	0.000831864	0.018763	0	0	0	0	0	0	0	0	0	0
OTU_629	___u17216.1__gi:577452_ ;k__fungi;p__ascomycota;c__eurotiomycetes;o__chaetothyriales;f__herpotrichiellaceae;g__phialophora;s__phialophora sp.;subclass chaetothyriomycetidae;subphylum__pezizomycotina;subkingdom__dikarya;superkingdom__eukaryota	0.0108621	0	0	0	0.00153435	0	0.00165588	0.00441443	0	0	0.00110884	0	0	0.00244016	0	0	0	0	0	0	0	0	0.0034046	0	0	0.00164549	0.00175654	0.00188882	0	0	0	0	0	0	0	0	0.00249559	0	0	0	0	0	0.00183038	0	0	0	0	0
OTU_630	___fm208879.1__gi:198041081_ ;k__fungi;p__basidiomycota;c__agaricomycetes;o__agaricales;f__hygrophoraceae;g__hygrocybe;s__hygrocybe spadicea;varietas hygrocybe spadicea var. spadicea;subclass agaricomycetidae;subkingdom__dikarya;superkingdom__eukaryota	0	0	0	0	0	0	0.00496763	0.00147148	0.0137674	0	0.00221769	0.0012515	0.0523242	0	0	0	0	0	0	0	0	0	0	0.00070278	0	0	0	0	0	0	0	0	0	0	0	0	0	0	0	0	0	0	0	0.00929627	0	0	0.00346446	0
OTU_631	___hq607852.1__gi:312434331_ ;k__fungi;p__ascomycota;c__eurotiomycetes;o__chaetothyriales;f__herpotrichiellaceae;g__exophiala;s__exophiala sp.;subclass chaetothyriomycetidae;subphylum__pezizomycotina;subkingdom__dikarya;superkingdom__eukaryota	0	0	0.00563158	0	0	0	0	0	0.00152971	0	0	0	0.00506363	0	0	0	0	0	0.00161436	0.00467333	0	0	0.00226974	0	0	0.00329099	0	0	0	0	0	0	0	0	0.0325542	0	0	0.00469076	0.00280749	0	0	0	0	0	0	0	0	0
OTU_632	___hq630353.1__gi:325516926_ ;k__fungi;p__fungi;c__mortierellomycotina;o__mortierellales;f__mortierellaceae;g__mortierella;s__mortierella paraensis;superkingdom__eukaryota;subphylum__mortierellomycotina	0	0	0	0.00247629	0	0	0.00165588	0	0.00305941	0	0	0.0012515	0.00168788	0	0.00191913	0.00158929	0.00132165	0	0.00484308	0	0.00586321	0	0	0	0.00090313	0	0.00351309	0	0.00287683	0.00176367	0.00784791	0.00286714	0	0	0	0.00155848	0.000831864	0.00234538	0	0	0	0	0	0	0	0	0	0.00152828
OTU_633	lipomyces tetrasporus ;k__fungi;p__ascomycota;c__saccharomycetes;o__saccharomycetales;f__lipomycetaceae;g__lipomyces;s__lipomyces tetrasporus;subphylum__saccharomycotina;subkingdom__dikarya;superkingdom__eukaryota	0.00724139	0.00936277	0.00187719	0	0	0	0	0	0	0	0	0	0	0.00244016	0	0	0	0	0	0	0	0.000816633	0	0	0.00180626	0	0.00351309	0	0.00719207	0	0	0.00573427	0	0.00159051	0.00162771	0	0	0	0.00561498	0	0	0	0.00366076	0	0	0.00217808	0	0
OTU_635	___hm044858.1__gi:296409975_ ;k__fungi;p__ascomycota;c__saccharomycetes;o__saccharomycetales;f__pichiaceae;g__pichia;s__pichia sp.;subphylum__saccharomycotina;subkingdom__dikarya;superkingdom__eukaryota	0	0	0	0	0	0	0	0	0.00611883	0	0.00332653	0	0	0	0.00191913	0	0	0	0	0	0.0014658	0	0	0	0	0	0.00526963	0	0.00431524	0	0	0	0	0	0	0	0	0	0	0	0.00193442	0	0	0	0.00241499	0	0	0
OTU_636	___gq465043.1__gi:292663005_ ;k__fungi;p__basidiomycota;c__exobasidiomycetes;o__microstromatales;f__microstromatales;g__sympodiomycopsis;s__sympodiomycopsis kandeliae;superkingdom__eukaryota;subkingdom__dikarya;subphylum__ustilaginomycotina	0.00482759	0.00561766	0	0	0	0	0.00496763	0.00147148	0.00764853	0	0	0	0.00168788	0	0	0	0	0	0	0.00155778	0.00293161	0	0	0	0	0	0	0	0	0	0	0	0	0	0	0	0	0	0	0	0	0	0.014643	0.00309876	0.00482998	0.00217808	0.00346446	0
OTU_637	___fj755832.1__gi:225032532_ ;k__fungi;p__basidiomycota;c__wallemiomycetes;o__wallemiales;f__wallemiales;g__wallemia;s__wallemia sp.;superkingdom__eukaryota;subkingdom__dikarya	0	0	0	0.00247629	0	0	0	0	0	0	0.00110884	0	0	0	0	0	0	0	0	0	0	0	0	0	0	0	0	0	0	0	0	0	0	0	0	0	0	0	0	0	0	0.00135422	0	0	0	0	0	0
OTU_638	___gu246262.1__gi:288804407_ ;k__fungi;p__ascomycota;c__saccharomycetes;o__saccharomycetales;f__metschnikowiaceae;g__danielozyma;s__candida ontarioensis;subphylum__saccharomycotina;subkingdom__dikarya;superkingdom__eukaryota	0.0036207	0.00187255	0.00187719	0.00247629	0	0	0.00165588	0	0	0	0.00110884	0	0.00843939	0	0	0	0	0.00125221	0.00161436	0.00623111	0	0	0	0	0.00451565	0	0	0	0	0.00176367	0	0	0	0	0	0	0	0.00469076	0.00280749	0	0	0.00135422	0	0.00309876	0	0	0	0
OTU_640	___dq365605.1__gi:86610802_ ;k__fungi;p__basidiomycota;c__agaricomycetes;o__gomphales;f__gomphaceae;g__ramaria;s__ramaria sp.;subclass phallomycetidae;subkingdom__dikarya;superkingdom__eukaryota	0.0012069	0	0	0	0	0	0	0	0	0	0	0	0.00506363	0	0	0	0	0	0.00322872	0	0	0	0.00113487	0	0.00090313	0	0.00175654	0	0.00287683	0.00705467	0	0	0	0.00159051	0.00488313	0	0	0	0.00561498	0	0.00193442	0	0	0	0	0	0.00173223	0.00152828
OTU_641	___fj345357.1__gi:225134685_ ;k__fungi;p__basidiomycota;c__microbotryomycetes;o__sporidiobolales;f__sporidiobolales;g__rhodotorula;s__rhodotorula glutinis;superkingdom__eukaryota;subkingdom__dikarya;subphylum__pucciniomycotina	0	0	0	0	0	0	0	0	0	0	0	0.032539	0	0	0	0.00317859	0.00132165	0	0	0	0	0	0.00113487	0.00421668	0	0	0	0	0	0	0	0	0	0.00159051	0	0	0	0	0	0	0	0	0.000915189	0	0	0.00435616	0	0
OTU_643	___aj890432.1__gi:62718897_ ;k__fungi;p__fungi;c__mortierellomycotina;o__mortierellales;f__mortierellaceae;g__mortierella;s__mortierella sp.;superkingdom__eukaryota;subphylum__mortierellomycotina	0	0.00187255	0	0	0	0	0	0.00441443	0	0	0.00110884	0.00375451	0.00168788	0.00244016	0.00383826	0.00317859	0.00132165	0.00250441	0	0	0	0	0	0	0.00361252	0	0.00175654	0	0	0	0	0.00286714	0	0	0	0	0.00166373	0	0	0	0	0	0.00183038	0.00154938	0	0	0	0.00305656
OTU_644	___af128440.1__gi:6940793_ ;k__fungi;p__ascomycota;c__leotiomycetes;o__helotiales;f__helotiales;g__mycoarthris;s__mycoarthris corallinus;superkingdom__eukaryota;subkingdom__dikarya;subphylum__pezizomycotina	0.0024138	0	0.00187719	0	0	0	0	0	0.00458912	0	0	0	0.00168788	0.00488031	0	0	0	0	0	0	0.0014658	0	0	0	0	0	0.00175654	0	0	0	0	0.00286714	0	0.00159051	0	0	0.000831864	0.00234538	0	0	0.00193442	0	0.00274557	0	0	0.00217808	0.00173223	0
OTU_646	___aj876487.1__gi:84452401_ ;k__fungi;p__basidiomycota;c__microbotryomycetes;o__sporidiobolales;f__sporidiobolales;g__rhodotorula;s__rhodotorula sp.;superkingdom__eukaryota;subkingdom__dikarya;subphylum__pucciniomycotina	0	0	0	0	0	0	0	0	0	0	0	0	0	0	0	0	0	0	0	0	0	0	0	0	0	0	0	0	0	0	0	0	0	0	0	0	0	0	0	0	0	0	0	0.00154938	0	0	0	0
OTU_647	___hm208715.1__gi:300915765_ ;k__fungi;p__ascomycota;c__dothideomycetes;o__pleosporales;f__cucurbitariaceae;g__pyrenochaeta;s__pyrenochaeta sp.;suborder__pleosporineae;subclass pleosporomycetidae;subphylum__pezizomycotina;subkingdom__dikarya;superkingdom__eukaryota	0.00965519	0.00187255	0	0	0	0	0	0	0	0	0	0	0	0	0	0	0	0	0	0	0	0	0	0	0	0	0	0	0	0	0	0	0	0	0	0	0	0.00234538	0	0	0	0	0	0	0	0	0.00173223	0
OTU_649	___am087275.1__gi:114414819_ ;k__fungi;p__ascomycota;c__dothideomycetes;o__pleosporomycetidae;f__gloniaceae;g__cenococcum;s__cenococcum geophilum;superkingdom__eukaryota;subkingdom__dikarya;subphylum__pezizomycotina;subclass pleosporomycetidae	0.0012069	0.00187255	0.00375439	0	0.00153435	0	0	0	0	0	0	0	0	0	0.00767651	0	0.00132165	0	0	0	0	0	0	0	0.00361252	0.00164549	0	0	0	0	0	0	0.00230808	0.00636203	0	0.00155848	0.00166373	0	0.00561498	0	0	0	0.00183038	0	0.00241499	0.00217808	0.00173223	0.00152828
OTU_651	___jn159575.1__gi:347984008_ ;k__fungi;p__basidiomycota;c__agaricomycetes;o__agaricales;f__psathyrellaceae;g__coprinellus;s__coprinellus flocculosus;subclass agaricomycetidae;subkingdom__dikarya;superkingdom__eukaryota	0	0	0	0	0	0	0	0	0	0	0	0	0	0	0.0479782	0	0.00132165	0	0	0	0	0	0.00113487	0	0	0	0	0.0358877	0	0	0	0	0	0	0	0	0.000831864	0	0	0	0	0	0	0	0	0	0	0
OTU_652	zymoseptoria verkleyi ;k__fungi;p__ascomycota;c__dothideomycetes;o__capnodiales;f__mycosphaerellaceae;g__zymoseptoria;s__zymoseptoria verkleyi;subclass dothideomycetidae;subphylum__pezizomycotina;subkingdom__dikarya;superkingdom__eukaryota	0	0	0	0.017334	0.021481	0.0270695	0	0.00147148	0.00152971	0.00226214	0.00443538	0.00500601	0	0	0	0	0	0	0	0	0	0	0.00113487	0.00140556	0	0	0	0	0	0.00352734	0	0	0	0	0	0	0	0	0	0	0	0	0	0	0	0	0	0
OTU_653	___am292050.1__gi:110835640_ ;k__fungi;p__ascomycota;c__ascomycota;o__ascomycota;f__ascomycota;g__trichocladium;s__trichocladium asperum;superkingdom__eukaryota;subkingdom__dikarya	0	0	0	0	0	0	0	0	0	0	0	0	0.00168788	0	0	0	0.00132165	0	0	0	0.0014658	0.000816633	0	0	0.00090313	0	0	0.0075553	0	0	0	0	0	0	0	0	0.00249559	0.00234538	0	0	0	0	0.000915189	0	0.00241499	0	0	0.00152828
OTU_655	bipolaris sorokiniana ;k__fungi;p__ascomycota;c__dothideomycetes;o__pleosporales;f__pleosporaceae;g__bipolaris;s__bipolaris sorokiniana;suborder__pleosporineae;subclass pleosporomycetidae;subphylum__pezizomycotina;subkingdom__dikarya;superkingdom__eukaryota	0	0	0	0	0.00153435	0	0	0	0	0.0033932	0	0	0	0	0	0	0	0	0	0	0	0	0	0	0	0	0	0	0	0	0	0	0	0	0	0	0	0	0	0	0	0	0	0	0.00482998	0.00217808	0.0207868	0.0336222
OTU_656	___jf439488.1__gi:328923738_ ;k__fungi;p__fungi;c__mortierellomycotina;o__mortierellales;f__mortierellaceae;g__mortierella;s__mortierella sp.;superkingdom__eukaryota;subphylum__mortierellomycotina	0.0036207	0.00374511	0.00563158	0.00495258	0.00153435	0.00135347	0.00496763	0.0132433	0.0122377	0.00452427	0.00221769	0.00750901	0.00675151	0.00244016	0.00383826	0.00953577	0.0052866	0.00626104	0.00484308	0.0109044	0.00586321	0	0.00113487	0	0.00722504	0.00658198	0	0.00188882	0.00431524	0	0	0.00286714	0.0115404	0	0	0.00467545	0.00831864	0.00938152	0.00280749	0	0.00193442	0	0.00457595	0.00464814	0.00965997	0	0.00692893	0.010698
OTU_657	___ab625584.1__gi:357429108_ ;k__fungi;p__ascomycota;c__ascomycota;o__ascomycota;f__ascomycota;g__staphylotrichum;s__staphylotrichum coccosporum;superkingdom__eukaryota;subkingdom__dikarya	0	0	0	0	0	0	0	0.00441443	0	0	0	0	0	0.00244016	0	0	0	0	0	0	0	0	0	0	0	0	0	0.00188882	0.0100689	0	0	0	0	0	0	0	0.00249559	0	0.00280749	0	0	0	0.0237949	0.00309876	0	0	0	0
OTU_658	___ay999136.1__gi:67644111_ ;k__fungi;p__ascomycota;c__sordariomycetes;o__sordariales;f__lasiosphaeriaceae;g__cercophora;s__cercophora coprophila;subclass sordariomycetidae;subphylum__pezizomycotina;subkingdom__dikarya;superkingdom__eukaryota	0.00482759	0	0	0	0	0	0	0	0	0	0	0	0	0	0	0	0	0	0	0	0	0	0	0	0	0	0	0	0	0	0	0	0	0	0	0	0	0	0	0	0	0	0	0	0	0	0.00173223	0
OTU_659	___aj317958.1__gi:20339271_ ;k__fungi;p__ascomycota;c__dothideomycetes;o__pleosporales;f__leptosphaeriaceae;g__leptosphaeria;s__leptosphaeria sp.;suborder__pleosporineae;subclass pleosporomycetidae;subphylum__pezizomycotina;subkingdom__dikarya;superkingdom__eukaryota	0.0024138	0	0	0.00247629	0	0	0.00165588	0.00882885	0	0.00113107	0	0	0	0	0	0	0	0	0	0	0	0.000816633	0.00113487	0	0	0	0.00526963	0	0.00143841	0	0	0	0	0	0	0	0.000831864	0	0.00561498	0	0	0	0.00366076	0	0.00724498	0	0	0
OTU_660	___hq608097.1__gi:312434575_ ;k__fungi;p__fungi;c__mortierellomycotina;o__mortierellales;f__mortierellaceae;g__mortierella;s__mortierella sp.;superkingdom__eukaryota;subphylum__mortierellomycotina	0.00482759	0.00561766	0.0131404	0.00990516	0.00306871	0.00676737	0.00496763	0.00882885	0.0122377	0.0248835	0.0133061	0.010012	0.0118151	0.00732047	0.00767651	0.0635718	0.00396495	0.0275486	0.00968617	0.0109044	0.00586321	0.00163327	0.0034046	0	0.0162563	0.00822747	0.00351309	0.00944412	0.00143841	0	0.0137338	0.00286714	0.00692425	0	0	0	0.00748677	0.0164177	0.00842247	0	0	0.00270845	0.00549114	0.00464814	0.00724498	0.00217808	0.0155901	0.0168111
OTU_661	___am292050.1__gi:110835640_ ;k__fungi;p__ascomycota;c__ascomycota;o__ascomycota;f__ascomycota;g__trichocladium;s__trichocladium asperum;superkingdom__eukaryota;subkingdom__dikarya	0.0012069	0.00187255	0.00563158	0	0	0	0	0	0.00152971	0.00226214	0.00110884	0.002503	0	0	0	0.00635718	0	0.00250441	0.00161436	0.00155778	0	0.000816633	0	0.00210834	0	0	0	0.00566647	0	0	0	0	0	0	0	0	0.000831864	0	0	0	0	0	0.00183038	0.00154938	0.00241499	0.00435616	0.00692893	0.00152828
OTU_662	morchella vulgaris ;k__fungi;p__ascomycota;c__pezizomycetes;o__pezizales;f__morchellaceae;g__morchella;s__morchella vulgaris;subphylum__pezizomycotina;subkingdom__dikarya;superkingdom__eukaryota	0	0	0	0	0	0	0	0	0.00152971	0	0	0	0	0	0	0	0	0	0	0	0	0	0	0	0.00180626	0	0	0	0	0	0.00196198	0	0	0	0	0	0	0	0	0	0	0	0	0	0	0	0	0
OTU_663	___ef392531.1__gi:145307995_ ;k__fungi;p__entomophthoromycota;c__basidiobolomycetes;o__basidiobolales;f__basidiobolaceae;g__basidiobolus;s__basidiobolus haptosporus;superkingdom__eukaryota	0	0	0	0	0	0	0	0	0	0.00113107	0	0	0	0	0	0	0	0	0	0	0	0.0024499	0	0	0	0.0756928	0	0	0.00143841	0	0	0	0	0.00159051	0	0	0.000831864	0	0	0	0	0	0	0	0	0	0	0
OTU_665	___aj301913.1__gi:17426617_ ;k__fungi;p__ascomycota;c__sordariomycetes;o__glomerellales;f__glomerellaceae;g__colletotrichum;s__glomerella acutata;subclass hypocreomycetidae;subphylum__pezizomycotina;subkingdom__dikarya;superkingdom__eukaryota	0.0012069	0	0	0.00247629	0	0.00135347	0	0	0	0	0	0	0	0	0.0115148	0	0	0.00250441	0	0	0	0.000816633	0	0	0.00993443	0	0	0	0	0.00352734	0	0	0.00461617	0	0	0	0.00332745	0.00234538	0	0	0	0	0	0	0	0.00217808	0	0
OTU_666	chaetosphaeronema sp. phy_40 ;k__fungi;p__ascomycota;c__dothideomycetes;o__pleosporales;f__phaeosphaeriaceae;g__chaetosphaeronema;s__chaetosphaeronema sp.;suborder__pleosporineae;subclass pleosporomycetidae;subphylum__pezizomycotina;subkingdom__dikarya;superkingdom__eukaryota	0	0	0	0	0	0	0.00496763	0	0.00152971	0.00113107	0	0.0012515	0	0	0	0	0.00396495	0	0	0	0	0	0	0	0	0	0	0	0	0	0.00588593	0	0	0	0	0	0	0.00938152	0	0	0	0	0	0	0.00241499	0	0	0
OTU_667	___dq356414.1__gi:86212252_ ;k__fungi;p__basidiomycota;c__agaricomycetes;o__cantharellales;f__ceratobasidiaceae;g__waitea;s__waitea circinata;subkingdom__dikarya;superkingdom__eukaryota	0.0398277	0	0	0.00247629	0	0	0	0	0	0	0	0	0	0	0	0	0	0.00125221	0	0	0.0014658	0	0	0	0	0	0	0	0.00143841	0	0	0	0	0	0	0	0	0	0	0	0	0	0	0	0	0	0	0
OTU_668	___eu750692.1__gi:190645818_ ;k__fungi;p__ascomycota;c__sordariomycetes;o__sordariales;f__chaetomiaceae;g__chaetomium;s__chaetomium sp.;subclass sordariomycetidae;subphylum__pezizomycotina;subkingdom__dikarya;superkingdom__eukaryota	0	0	0	0	0	0	0	0	0	0	0.00221769	0	0	0	0	0	0	0	0	0	0	0	0	0	0	0	0	0	0	0	0	0	0	0	0	0	0	0	0	0	0	0	0	0	0	0	0	0
OTU_669	___ay999136.1__gi:67644111_ ;k__fungi;p__ascomycota;c__sordariomycetes;o__sordariales;f__lasiosphaeriaceae;g__cercophora;s__cercophora coprophila;subclass sordariomycetidae;subphylum__pezizomycotina;subkingdom__dikarya;superkingdom__eukaryota	0	0	0.00375439	0	0	0	0	0	0	0	0	0	0	0	0	0	0	0	0	0	0	0	0	0	0	0	0	0.00188882	0	0	0.088289	0	0	0	0.00162771	0	0	0	0	0	0	0	0	0	0	0	0	0
OTU_670	trichosporon porosum ;k__fungi;p__basidiomycota;c__tremellomycetes;o__tremellales;f__tremellales;g__trichosporon;s__trichosporon porosum;superkingdom__eukaryota;subkingdom__dikarya	0	0	0	0	0	0	0	0	0.00152971	0	0	0	0	0	0.00191913	0	0	0	0	0	0	0	0	0	0.00180626	0	0	0	0	0	0	0	0	0	0	0	0	0	0	0	0	0	0	0	0	0	0	0.00152828
OTU_671	___dq485617.1__gi:94995469_ ;k__fungi;p__chytridiomycota;c__chytridiomycetes;o__rhizophydiales;f__rhizophydiales;g__operculomyces;s__rhizophydium sp.;superkingdom__eukaryota	0	0	0	0	0	0.00135347	0	0	0	0	0.00221769	0	0	0	0	0	0	0.00125221	0	0	0.00439741	0	0	0	0.00090313	0	0	0	0	0	0	0	0	0.00159051	0.00651084	0	0	0	0	0	0	0	0.00274557	0.00309876	0	0	0	0
OTU_673	___hm562211.1__gi:308745283_ ;k__fungi;p__basidiomycota;c__agaricomycetes;o__agaricales;f__pluteaceae;g__volvariella;s__volvariella caesiotincta;subclass agaricomycetidae;subkingdom__dikarya;superkingdom__eukaryota	0	0	0	0	0	0	0.00165588	0.00147148	0	0	0	0	0	0	0	0	0	0	0	0	0	0	0	0	0	0.00164549	0.0316178	0	0	0.00176367	0	0.0143357	0.00461617	0	0	0	0	0	0	0	0	0	0	0	0	0	0	0
OTU_675	___ay706329.1__gi:51340262_ ;k__fungi;p__ascomycota;c__leotiomycetes;o__leotiomycetes;f__leotiomycetes;g__leohumicola;s__leohumicola minima;superkingdom__eukaryota;subkingdom__dikarya;subphylum__pezizomycotina	0.0012069	0.00374511	0.00187719	0.00247629	0	0.00270695	0.00827938	0	0	0	0	0	0	0	0	0	0	0.00125221	0	0.00623111	0.00586321	0	0	0	0	0	0	0	0	0	0.00196198	0	0	0	0.00325542	0	0	0	0	0	0	0.00135422	0	0	0	0	0	0
OTU_676	___dq983814.1__gi:118429084_ ;k__fungi;p__basidiomycota;c__agaricomycetes;o__sebacinales;f__sebacinales;g__serendipita;s__sebacina vermifera;superkingdom__eukaryota;subkingdom__dikarya	0	0	0	0	0	0	0	0.0132433	0	0	0	0	0	0	0	0	0	0	0	0	0.00439741	0	0	0	0	0	0	0	0.00143841	0.00529101	0	0	0	0	0.00325542	0	0.0149735	0	0	0	0	0	0	0	0	0	0.00173223	0.00916969
OTU_677	acaulospora minuta ;k__fungi;p__glomeromycota;c__glomeromycetes;o__diversisporales;f__acaulosporaceae;g__acaulospora;s__acaulospora minuta;superkingdom__eukaryota	0.00603449	0	0	0.00247629	0	0	0.00496763	0.00294295	0.00152971	0	0	0	0	0.00732047	0	0	0	0	0	0.00311556	0.0014658	0.00163327	0	0	0.00451565	0	0	0.00377765	0	0	0	0.00286714	0	0	0	0	0.00249559	0.00703614	0.00561498	0	0	0	0.000915189	0	0	0	0	0.00152828
OTU_678	___dq491504.1__gi:92430242_ ;k__fungi;p__ascomycota;c__pezizomycetes;o__pezizales;f__ascobolaceae;g__ascobolus;s__ascobolus crenulatus;subphylum__pezizomycotina;subkingdom__dikarya;superkingdom__eukaryota	0	0	0.0112632	0	0	0.00406042	0	0	0.00152971	0	0	0	0	0.0219614	0	0	0	0	0	0	0	0	0	0	0	0	0	0	0	0	0	0	0	0	0	0	0	0.00938152	0	0	0	0.00135422	0	0	0	0	0	0
OTU_680	___fj903373.1__gi:237641592_ ;k__fungi;p__ascomycota;c__leotiomycetes;o__helotiales;f__helotiaceae;g__ascocoryne;s__ascocoryne cylichnium;subphylum__pezizomycotina;subkingdom__dikarya;superkingdom__eukaryota	0.00844829	0	0	0	0	0.00270695	0.00993526	0	0	0	0	0	0	0	0	0	0	0	0	0	0	0	0	0	0	0	0	0	0.00143841	0	0.00588593	0.00573427	0.00461617	0.00318102	0	0	0	0	0.00842247	0	0	0	0	0.00774689	0.00241499	0	0	0
OTU_681	___af106534.1__gi:5139067_ ;k__fungi;p__ascomycota;c__orbiliomycetes;o__orbiliales;f__orbiliaceae;g__arthrobotrys;s__arthrobotrys conoides;subphylum__pezizomycotina;subkingdom__dikarya;superkingdom__eukaryota	0	0	0	0	0	0	0	0	0	0	0	0	0	0	0	0	0	0	0	0	0	0	0	0	0	0	0	0.0944412	0	0	0	0	0	0	0	0	0	0.00234538	0	0	0	0	0	0	0	0	0	0
OTU_683	cadophora sp. ref042 ;k__fungi;p__ascomycota;c__leotiomycetes;o__helotiales;f__helotiales;g__cadophora;s__cadophora sp.;superkingdom__eukaryota;subkingdom__dikarya;subphylum__pezizomycotina	0	0.00187255	0.00375439	0	0	0	0	0.0176577	0	0	0	0	0.00337576	0.00488031	0	0	0	0	0.00161436	0	0.0014658	0	0.00113487	0	0.00090313	0.00329099	0	0.00188882	0.00143841	0	0	0	0.00230808	0.00318102	0	0	0.00249559	0.00234538	0	0	0	0	0	0	0.00241499	0.00653424	0.00346446	0.00152828
OTU_684	sebacina vermifera ;k__fungi;p__basidiomycota;c__agaricomycetes;o__sebacinales;f__sebacinales;g__serendipita;s__sebacina vermifera;superkingdom__eukaryota;subkingdom__dikarya	0.00482759	0	0	0	0	0	0	0	0	0	0	0	0	0.0122008	0	0	0	0	0.00161436	0	0	0	0	0	0	0	0.0105393	0	0	0	0	0	0	0	0	0	0	0	0	0.00116054	0	0	0	0	0	0	0	0
OTU_686	___ef634249.1__gi:157065131_ ;k__fungi;p__chytridiomycota;c__chytridiomycetes;o__rhizophydiales;f__rhizophydiales;g__homolaphlyctis;s__homoloaphlyctis polyrhiza;superkingdom__eukaryota	0	0	0	0	0	0	0	0	0	0	0	0	0	0	0.0115148	0	0	0	0	0	0	0	0	0	0	0	0.00526963	0	0.00863049	0	0	0.0286714	0	0	0	0	0	0	0	0	0	0	0	0	0	0	0	0
OTU_687	___gu553291.1__gi:292454288_ ;k__fungi;p__ascomycota;c__lecanoromycetes;o__lecanoromycetidae;f__physciaceae;g__rinodina;s__rinodina bischoffii;superkingdom__eukaryota;subkingdom__dikarya;subphylum__pezizomycotina;subclass lecanoromycetidae;suborder__caliciales	0.0193104	0	0	0	0	0	0	0	0	0	0	0	0	0	0	0	0	0	0	0	0	0	0	0	0	0	0	0	0	0	0	0	0	0	0	0	0	0	0	0	0	0	0.0219645	0	0	0	0	0
OTU_688	ramaria suecica ;k__fungi;p__basidiomycota;c__agaricomycetes;o__gomphales;f__gomphaceae;g__ramaria;s__ramaria suecica;subclass phallomycetidae;subkingdom__dikarya;superkingdom__eukaryota	0.0036207	0	0.00187719	0	0	0	0.00165588	0	0	0	0	0	0	0	0	0	0.00132165	0	0	0	0.0014658	0	0	0	0.00090313	0.00329099	0	0	0.00143841	0	0	0	0	0	0	0.00155848	0	0	0.00280749	0	0	0	0.00274557	0	0.00241499	0.00435616	0.00519669	0
OTU_689	debaryomyces hansenii ;k__fungi;p__ascomycota;c__saccharomycetes;o__saccharomycetales;f__debaryomycetaceae;g__debaryomyces;s__debaryomyces hansenii;subphylum__saccharomycotina;subkingdom__dikarya;superkingdom__eukaryota	0	0	0	0	0	0	0	0	0.00152971	0.00113107	0.00110884	0	0	0	0	0	0	0	0	0	0	0	0.0113487	0	0	0	0	0	0	0.00352734	0	0	0	0	0.00325542	0	0	0	0	0	0	0	0	0	0	0	0	0.00152828
OTU_690	___ef432822.2__gi:257412776_ ;k__fungi;p__chytridiomycota;c__chytridiomycetes;o__lobulomycetales;f__lobulomycetaceae;g__maunachytrium;s__maunachytrium keaense;superkingdom__eukaryota	0	0	0	0	0	0	0	0	0	0	0	0	0	0	0	0	0	0	0.00161436	0	0	0	0	0	0	0.00493648	0	0	0	0	0	0	0	0	0.0260434	0	0	0.00234538	0	0	0	0	0	0.00464814	0	0	0	0
OTU_691	___jn123359.1__gi:355336474_ ;k__fungi;p__ascomycota;c__eurotiomycetes;o__chaetothyriales;f__herpotrichiellaceae;g__phialophora;s__phialophora mustea;subclass chaetothyriomycetidae;subphylum__pezizomycotina;subkingdom__dikarya;superkingdom__eukaryota	0.0012069	0.0112353	0	0	0	0.00135347	0.00165588	0.00294295	0	0	0	0	0	0	0	0	0	0	0.00645745	0	0	0	0	0	0.00812817	0	0	0	0	0	0	0	0	0.00159051	0.00325542	0	0.00499118	0	0	0	0.00193442	0	0	0.00154938	0	0	0	0
OTU_692	___fj827730.1__gi:268636588_ ;k__fungi;p__chytridiomycota;c__chytridiomycetes;o__spizellomycetales;f__spizellomycetaceae;g__spizellomyces;s__spizellomyces sp.;superkingdom__eukaryota	0.0012069	0	0.0619474	0	0	0	0	0	0	0	0	0	0	0	0	0	0	0	0	0	0	0	0	0	0.00090313	0	0	0	0	0	0	0	0	0	0	0	0	0	0	0	0	0	0	0	0	0	0.00173223	0
OTU_693	arthroascus schoenii ;k__fungi;p__ascomycota;c__saccharomycetes;o__saccharomycetales;f__saccharomycopsidaceae;g__arthroascus;s__arthroascus schoenii;subphylum__saccharomycotina;subkingdom__dikarya;superkingdom__eukaryota	0	0	0	0.00247629	0	0	0.00331175	0	0.00152971	0	0.00110884	0	0	0	0	0	0	0	0	0	0	0	0	0	0	0.00164549	0	0	0.00143841	0.00176367	0	0	0	0	0	0	0.000831864	0	0	0	0	0	0	0	0.00241499	0.00217808	0.00173223	0
OTU_695	___hq630352.1__gi:325516925_ ;k__fungi;p__fungi;c__mortierellomycotina;o__mortierellales;f__mortierellaceae;g__mortierella;s__mortierella beljakovae;superkingdom__eukaryota;subphylum__mortierellomycotina	0	0	0	0	0	0	0	0	0	0	0	0	0	0	0	0	0	0	0	0	0.0014658	0	0	0	0.00361252	0	0	0	0	0	0	0	0	0	0	0	0	0	0	0	0	0	0.000915189	0	0	0.00435616	0.00173223	0
OTU_696	___hq607897.1__gi:312434375_ ;k__fungi;p__ascomycota;c__dothideomycetes;o__botryosphaeriales;f__botryosphaeriaceae;g__lasiodiplodia;s__lasiodiplodia crassispora;subphylum__pezizomycotina;subkingdom__dikarya;superkingdom__eukaryota	0.0012069	0.00187255	0.00187719	0.00495258	0	0.00270695	0	0	0.00152971	0	0.00110884	0	0.00337576	0.00244016	0	0	0	0	0	0.00155778	0	0.000816633	0	0	0	0	0	0	0	0	0.00196198	0	0	0	0	0.00155848	0	0	0	0	0	0	0	0.00154938	0	0	0.00173223	0
OTU_697	___hm036645.1__gi:294861926_ ;k__fungi;p__basidiomycota;c__agaricomycetes;o__agaricales;f__tricholomataceae;g__flagelloscypha;s__flagelloscypha minutissima;subclass agaricomycetidae;subkingdom__dikarya;superkingdom__eukaryota	0.0012069	0	0	0.00247629	0	0	0	0	0	0	0	0.002503	0	0	0	0	0	0	0	0.00155778	0	0	0	0	0.00090313	0	0.00175654	0	0.00143841	0.00176367	0	0	0	0	0	0	0	0.018763	0	0	0	0	0	0	0	0	0	0.00305656
OTU_698	___am418548.1__gi:126468641_ ;k__fungi;p__glomeromycota;c__glomeromycetes;o__diversisporales;f__diversisporaceae;g__redeckera;s__glomus fulvum;superkingdom__eukaryota	0	0	0	0	0	0	0	0	0	0	0	0	0	0	0	0	0	0	0.00161436	0	0	0	0	0	0.00180626	0.00164549	0	0	0	0	0.00392395	0	0	0	0	0	0	0	0	0	0	0	0	0	0	0	0	0
OTU_701	___dq320562.1__gi:83945109_ ;k__fungi;p__ascomycota;c__lecanoromycetes;o__peltigerales;f__nephromataceae;g__nephroma;s__nephroma isidiosum;suborder__peltigerineae;subclass lecanoromycetidae;subphylum__pezizomycotina;subkingdom__dikarya;superkingdom__eukaryota	0	0	0.00750878	0	0	0	0	0.00735738	0	0	0	0	0	0	0	0	0.0026433	0	0	0	0	0	0	0	0	0	0	0	0	0	0	0	0	0	0	0	0	0	0	0	0	0	0.0082367	0.00309876	0	0	0	0
OTU_703	___fj010295.1__gi:198415116_ ;k__fungi;p__ascomycota;c__dothideomycetes;o__myriangiales;f__elsinoaceae;g__elsinoe;s__elsinoe fawcettii;subclass dothideomycetidae;subphylum__pezizomycotina;subkingdom__dikarya;superkingdom__eukaryota	0.0132759	0.00187255	0	0	0	0	0	0.0191292	0.00305941	0	0.00110884	0.0012515	0	0	0	0	0	0	0	0	0	0	0	0	0.00090313	0	0	0	0	0	0.00196198	0	0	0	0	0	0	0.00234538	0	0	0	0	0	0	0	0	0	0
OTU_705	___aj504645.1__gi:33386526_ ;k__fungi;p__glomeromycota;c__glomeromycetes;o__paraglomerales;f__paraglomeraceae;g__paraglomus;s__paraglomus sp.;superkingdom__eukaryota	0	0	0	0	0	0	0	0	0	0	0	0	0	0	0	0	0	0	0	0	0	0	0	0	0	0	0	0	0	0	0	0	0	0	0	0.00467545	0.00249559	0	0	0	0	0	0.00274557	0.00309876	0	0	0	0
OTU_706	___ay729065.1__gi:53771791_ ;k__fungi;p__ascomycota;c__sordariomycetes;o__hypocreales;f__nectriaceae;g__fusarium;s__fusarium sp.;subclass hypocreomycetidae;subphylum__pezizomycotina;subkingdom__dikarya;superkingdom__eukaryota	0	0	0	0	0	0	0	0.00147148	0.00152971	0.00452427	0.00221769	0.00375451	0.00337576	0	0	0.00158929	0	0.00250441	0.00161436	0.00311556	0.0014658	0	0.00113487	0.00070278	0	0	0	0.00377765	0	0	0	0.00286714	0	0	0	0	0.00166373	0	0	0	0	0.00135422	0.00183038	0.00309876	0	0	0.00692893	0.00305656
OTU_707	___ay632663.1__gi:49035543_ ;k__fungi;p__ascomycota;c__sordariomycetes;o__hypocreales;f__hypocreales;g__emericellopsis;s__emericellopsis microspora;superkingdom__eukaryota;subkingdom__dikarya;subphylum__pezizomycotina;subclass hypocreomycetidae	0.0012069	0	0.00187719	0.00742887	0.00460306	0.00135347	0.00165588	0.00147148	0.00152971	0	0	0	0.00168788	0.0170811	0.00575738	0	0	0	0.00161436	0.00778889	0.00439741	0	0	0.00070278	0.0117407	0	0	0	0.017261	0	0	0	0	0	0.00488313	0.00779241	0.00665491	0.00234538	0.00842247	0	0	0	0.00366076	0.00309876	0	0	0	0.00458484
OTU_708	___gu062204.1__gi:262034938_ ;k__fungi;p__ascomycota;c__dothideomycetes;o__pleosporales;f__sporormiaceae;g__preussia;s__preussia sp.;subclass pleosporomycetidae;subphylum__pezizomycotina;subkingdom__dikarya;superkingdom__eukaryota	0	0.00187255	0.00187719	0	0	0.00135347	0.00331175	0	0	0	0.00110884	0.002503	0.00337576	0	0.00191913	0	0	0	0.00161436	0.00155778	0	0	0	0	0.00180626	0	0	0.00188882	0	0	0.00196198	0.00286714	0.00692425	0.00477152	0	0	0.000831864	0.00234538	0	0	0.0251475	0	0.000915189	0.00154938	0	0.00653424	0	0
OTU_710	___ab638470.1__gi:359804139_ ;k__fungi;p__fungi;c__mortierellomycotina;o__mortierellales;f__mortierellaceae;g__mortierella;s__mortierella sp.;superkingdom__eukaryota;subphylum__mortierellomycotina	0	0	0	0.0198103	0	0	0	0	0	0	0	0	0	0	0	0	0	0.00250441	0	0	0	0	0	0	0	0	0	0	0	0	0	0	0	0	0	0	0.000831864	0	0	0	0	0	0	0	0	0	0	0
OTU_711	___eu697247.1__gi:189170047_ ;k__fungi;p__ascomycota;c__pezizomycetes;o__pezizales;f__tuberaceae;g__tuber;s__tuber pacificum;subphylum__pezizomycotina;subkingdom__dikarya;superkingdom__eukaryota	0	0.00374511	0.00187719	0	0	0	0.00331175	0.0103003	0	0	0	0	0.00168788	0.0122008	0	0	0	0	0	0.00155778	0	0	0	0	0.00270939	0	0	0	0	0	0	0	0	0	0	0	0.000831864	0	0	0	0	0	0.00183038	0	0.00241499	0	0.00519669	0.00152828
OTU_712	___eu041777.1__gi:157277372_ ;k__fungi;p__ascomycota;c__sordariomycetes;o__sordariomycetes;f__sordariomycetes;g__myrmecridium;s__myrmecridium schulzeri;superkingdom__eukaryota;subkingdom__dikarya;subphylum__pezizomycotina	0.00482759	0	0	0	0.00153435	0	0	0	0.00305941	0	0	0	0	0	0.00191913	0	0	0	0	0	0.0102606	0	0	0	0	0	0.00351309	0.0169994	0	0	0	0	0	0	0	0	0	0.00234538	0.00842247	0	0	0	0	0	0	0	0	0
OTU_713	___hq604760.1__gi:315270750_ ;k__fungi;p__basidiomycota;c__agaricomycetes;o__agaricales;f__psathyrellaceae;g__psathyrella;s__psathyrella sp.;subclass agaricomycetidae;subkingdom__dikarya;superkingdom__eukaryota	0	0	0	0	0	0	0	0	0	0	0	0	0	0	0	0	0	0	0	0	0	0	0	0	0	0	0	0	0	0	0	0	0	0	0	0	0	0	0	0	0	0	0	0	0	0	0	0
OTU_714	___ab289660.1__gi:126722409_ ;k__fungi;p__basidiomycota;c__agaricomycetes;o__agaricales;f__tricholomataceae;g__tricholoma;s__tricholoma auratum;subclass agaricomycetidae;subkingdom__dikarya;superkingdom__eukaryota	0	0	0	0	0	0	0	0	0.0336536	0	0	0	0	0.00732047	0	0	0	0	0	0	0	0	0	0	0	0	0	0	0	0	0	0.00860141	0	0	0	0	0	0	0	0.00116054	0	0	0	0	0	0	0	0
OTU_717	___dq189222.1__gi:76150856_ ;k__fungi;p__ascomycota;c__saccharomycetes;o__saccharomycetales;f__dipodascaceae;g__galactomyces;s__galactomyces geotrichum;subphylum__saccharomycotina;subkingdom__dikarya;superkingdom__eukaryota	0	0	0	0	0	0	0	0	0	0	0	0	0	0	0	0	0	0	0	0	0	0.000816633	0	0	0	0	0.00175654	0	0	0	0	0	0	0	0	0	0	0	0	0.00696322	0.013541	0	0	0	0	0	0	0
OTU_718	___fj196612.1__gi:209922421_ ;k__fungi;p__ascomycota;c__eurotiomycetes;o__eurotiales;f__aspergillaceae;g__penicillium;s__penicillium sp.;subclass eurotiomycetidae;subphylum__pezizomycotina;subkingdom__dikarya;superkingdom__eukaryota	0	0.00187255	0	0	0.00153435	0	0	0	0.00152971	0	0.00110884	0	0	0	0.00383826	0	0	0	0	0.00155778	0	0	0	0	0.00090313	0	0	0	0	0	0	0	0	0.00795254	0	0.00155848	0	0	0.00280749	0	0	0	0.000915189	0.00309876	0	0.00217808	0	0
OTU_719	___af297667.1__gi:15148402_ ;k__fungi;p__ascomycota;c__lecanoromycetes;o__umbilicariales;f__umbilicariaceae;g__umbilicaria;s__umbilicaria muehlenbergii;subclass umbilicariomycetidae;subphylum__pezizomycotina;subkingdom__dikarya;superkingdom__eukaryota	0	0	0	0	0	0	0	0	0	0	0	0	0	0.00976062	0	0	0	0	0	0	0	0.00163327	0	0	0	0.00164549	0.00702617	0	0	0	0	0	0	0	0	0	0.00249559	0.00938152	0	0	0	0	0	0	0	0	0	0
OTU_722	___ay956759.1__gi:63029653_ ;k__fungi;p__ascomycota;c__dothideomycetes;o__pleosporales;f__pleosporaceae;g__alternaria;s__embellisia chlamydospora;suborder__pleosporineae;subclass pleosporomycetidae;subphylum__pezizomycotina;subkingdom__dikarya;superkingdom__eukaryota	0	0	0.00187719	0.00247629	0.0552368	0	0	0	0	0.00113107	0	0	0	0	0.00191913	0.00158929	0	0	0	0	0	0	0	0	0.00090313	0	0	0.00188882	0	0	0	0	0	0	0	0	0	0	0	0	0	0	0	0	0	0	0	0
OTU_725	___ay438276.1__gi:42650622_ ;k__fungi;p__ascomycota;c__lecanoromycetes;o__teloschistales;f__teloschistaceae;g__xanthoria;s__xanthoria aureola;subfamily__xanthorioideae;suborder__teloschistineae;subclass lecanoromycetidae;subphylum__pezizomycotina;subkingdom__dikarya;superkingdom__eukaryota	0	0	0	0	0	0	0	0	0	0	0	0	0	0	0	0	0	0	0	0	0	0	0	0	0	0	0	0	0	0	0	0	0	0	0	0	0	0	0	0	0	0	0.0375228	0	0	0	0	0
OTU_728	___am901696.1__gi:163257631_ ;k__fungi;p__basidiomycota;c__cystobasidiomycetes;o__erythrobasidiales;f__erythrobasidiaceae;g__rhodotorula;s__rhodotorula sp.;subphylum__pucciniomycotina;subkingdom__dikarya;superkingdom__eukaryota	0	0.00749022	0	0.00247629	0.00306871	0.00135347	0	0	0	0	0	0	0	0	0	0.00158929	0.00396495	0	0	0	0	0.00326653	0.00113487	0.00843336	0	0	0	0.00188882	0.0100689	0.00705467	0	0	0	0	0.00162771	0	0	0	0	0	0	0	0	0	0	0	0	0
OTU_729	___af444507.2__gi:38492166_ ;k__fungi;p__basidiomycota;c__microbotryomycetes;o__microbotryomycetes;f__microbotryomycetes;g__rhodotorula;s__rhodotorula auriculariae;superkingdom__eukaryota;subkingdom__dikarya;subphylum__pucciniomycotina	0	0	0	0	0	0.00406042	0	0	0	0	0.00110884	0	0	0	0	0	0	0	0.00161436	0	0.0014658	0	0	0	0.00270939	0	0.00175654	0	0	0.00176367	0	0	0	0	0	0	0.000831864	0	0	0	0	0	0.000915189	0.00154938	0	0	0	0
OTU_732	___dq247778.1__gi:78893436_ ;k__fungi;p__ascomycota;c__sordariomycetes;o__hypocreales;f__nectriaceae;g__nectria;s__nectria lugdunensis;subclass hypocreomycetidae;subphylum__pezizomycotina;subkingdom__dikarya;superkingdom__eukaryota	0.0036207	0	0.00375439	0	0	0	0.00165588	0.00147148	0.00611883	0	0	0	0	0.00976062	0	0	0	0	0	0	0	0.000816633	0.00113487	0	0.00090313	0.00164549	0	0	0.00143841	0	0	0	0	0	0.00162771	0	0	0	0	0	0	0	0.00183038	0	0	0	0.00346446	0.00305656
OTU_733	___hq607814.1__gi:312434294_ ;k__fungi;p__ascomycota;c__dothideomycetes;o__botryosphaeriales;f__botryosphaeriaceae;g__botryosphaeria;s__botryosphaeria sp.;subphylum__pezizomycotina;subkingdom__dikarya;superkingdom__eukaryota	0	0.00374511	0.00375439	0	0.00153435	0	0.00165588	0.00294295	0.00458912	0	0	0	0.00506363	0.00244016	0	0	0	0	0.00484308	0.00155778	0.0014658	0	0	0	0.00180626	0.00329099	0.00175654	0	0.00143841	0	0	0	0	0.00318102	0.00651084	0	0.00166373	0.00469076	0.00280749	0	0	0	0.00366076	0.00464814	0	0	0	0
OTU_734	___eu284099.1__gi:161778845_ ;k__fungi;p__ascomycota;c__saccharomycetes;o__saccharomycetales;f__saccharomycetales;g__candida;s__candida sp.;superkingdom__eukaryota;subkingdom__dikarya;subphylum__saccharomycotina	0	0	0	0	0	0	0	0	0.00764853	0	0	0	0	0.0146409	0	0	0	0	0	0	0.0161238	0	0	0	0.00090313	0	0	0	0	0	0	0	0	0	0	0	0	0	0.00280749	0	0	0	0	0	0.012075	0	0	0
OTU_735	___ay729051.1__gi:53771777_ ;k__fungi;p__ascomycota;c__sordariomycetes;o__hypocreales;f__nectriaceae;g__fusarium;s__fusarium sp.;subclass hypocreomycetidae;subphylum__pezizomycotina;subkingdom__dikarya;superkingdom__eukaryota	0.0036207	0.00374511	0	0	0.00153435	0	0	0	0.0122377	0	0	0	0	0.00732047	0	0.00158929	0	0	0	0	0	0	0	0	0	0	0.00351309	0	0.00143841	0.00881834	0	0	0	0	0	0	0.00166373	0	0.00561498	0	0	0	0	0.00774689	0	0	0	0
OTU_736	___hq607897.1__gi:312434375_ ;k__fungi;p__ascomycota;c__dothideomycetes;o__botryosphaeriales;f__botryosphaeriaceae;g__lasiodiplodia;s__lasiodiplodia crassispora;subphylum__pezizomycotina;subkingdom__dikarya;superkingdom__eukaryota	0.0024138	0	0.00375439	0	0	0.00135347	0.00165588	0	0.00152971	0	0	0	0	0	0	0	0	0	0	0.00155778	0.00293161	0	0	0	0	0	0.00175654	0	0.00143841	0.00352734	0	0	0	0.00159051	0.00325542	0	0	0.00234538	0	0	0	0	0	0	0	0	0.00173223	0
OTU_737	___eu035420.1__gi:157325616_ ;k__fungi;p__ascomycota;c__eurotiomycetes;o__chaetothyriales;f__herpotrichiellaceae;g__exophiala;s__exophiala sp.;subclass chaetothyriomycetidae;subphylum__pezizomycotina;subkingdom__dikarya;superkingdom__eukaryota	0.0036207	0	0	0	0	0.00270695	0	0.00147148	0.00152971	0	0.00110884	0	0.00337576	0	0	0	0	0	0.0145293	0	0	0	0	0	0	0.00329099	0.00351309	0	0	0	0	0	0	0	0	0	0.00166373	0	0	0	0	0	0	0	0	0.0152466	0	0
OTU_738	___u66437.1__gi:2289068_ ;k__fungi;p__basidiomycota;c__agaricomycetes;o__agaricales;f__tricholomataceae;g__rickenella;s__rickenella pseudogrisella;subclass agaricomycetidae;subkingdom__dikarya;superkingdom__eukaryota	0	0	0	0	0	0	0	0	0.0137674	0	0	0	0	0	0	0	0	0	0	0	0	0	0.0034046	0	0	0	0	0	0	0	0	0	0	0	0.00162771	0	0	0	0	0	0	0	0	0	0	0	0	0
OTU_739	___ab435226.1__gi:262317519_ ;k__fungi;p__chytridiomycota;c__chytridiomycetes;o__rhizophydiales;f__rhizophydiales;g__batrachochytrium;s__batrachochytrium dendrobatidis;superkingdom__eukaryota	0	0	0	0	0	0	0	0	0	0	0	0	0	0	0	0	0	0	0.00161436	0.00311556	0	0	0	0	0.00180626	0	0.00175654	0	0	0.00176367	0	0.00573427	0	0	0	0	0.00249559	0	0	0	0	0	0	0	0	0	0	0.00305656
OTU_740	___eu750680.1__gi:190645806_ ;k__fungi;p__ascomycota;c__sordariomycetes;o__hypocreales;f__nectriaceae;g__fusarium;s__fusarium sp.;subclass hypocreomycetidae;subphylum__pezizomycotina;subkingdom__dikarya;superkingdom__eukaryota	0.00603449	0.00187255	0.00187719	0	0.00153435	0	0.00165588	0	0.00458912	0	0.00110884	0.0012515	0.00506363	0	0	0	0	0	0.00161436	0.00311556	0	0	0	0	0.00180626	0	0	0	0.00143841	0	0.00196198	0	0	0.00318102	0.00488313	0	0.000831864	0	0.00280749	0.00116054	0	0	0.00366076	0	0	0.00435616	0.00173223	0.00458484
OTU_741	___hq607852.1__gi:312434331_ ;k__fungi;p__ascomycota;c__eurotiomycetes;o__chaetothyriales;f__herpotrichiellaceae;g__exophiala;s__exophiala sp.;subclass chaetothyriomycetidae;subphylum__pezizomycotina;subkingdom__dikarya;superkingdom__eukaryota	0.0012069	0	0	0.00495258	0	0	0	0	0.00305941	0	0	0	0	0	0	0	0	0	0	0	0.00732901	0	0	0	0	0	0	0	0	0	0	0.00286714	0.00461617	0	0	0	0	0	0.00842247	0	0	0.00135422	0	0	0	0.00217808	0	0.00305656
OTU_742	trichocladium asperum ;k__fungi;p__ascomycota;c__ascomycota;o__ascomycota;f__ascomycota;g__trichocladium;s__trichocladium asperum;superkingdom__eukaryota;subkingdom__dikarya	0	0	0	0	0	0	0	0	0	0	0	0	0	0	0	0.00158929	0	0	0	0	0	0	0.00113487	0	0.00180626	0	0	0.0075553	0	0	0.00196198	0	0	0	0	0	0.000831864	0	0	0	0.00193442	0	0	0	0	0	0	0
OTU_744	___ay997041.1__gi:62866647_ ;k__fungi;p__entomophthoromycota;c__entomophthoromycetes;o__entomophthorales;f__ancylistaceae;g__conidiobolus;s__conidiobolus coronatus;superkingdom__eukaryota	0	0.00561766	0	0	0	0	0	0	0.00305941	0	0	0	0.00168788	0	0	0	0	0	0	0	0	0	0	0	0.00180626	0	0	0	0	0.00176367	0	0	0	0	0	0	0	0.00469076	0	0	0	0	0	0	0	0	0	0
OTU_745	___ay461839.1__gi:38706936_ ;k__fungi;p__basidiomycota;c__agaricomycetes;o__agaricales;f__psathyrellaceae;g__coprinopsis;s__coprinopsis stercorea;subclass agaricomycetidae;subkingdom__dikarya;superkingdom__eukaryota	0.012069	0	0	0	0	0	0	0	0	0	0	0	0	0	0	0	0	0	0	0	0	0	0	0	0	0	0	0	0	0	0	0	0	0	0	0	0	0	0	0	0	0	0	0	0	0	0	0
OTU_746	___hq832986.1__gi:323651432_ ;k__fungi;p__ascomycota;c__sordariomycetes;o__hypocreales;f__clavicipitaceae;g__paecilomyces;s__paecilomyces sp.;subclass hypocreomycetidae;subphylum__pezizomycotina;subkingdom__dikarya;superkingdom__eukaryota	0	0	0.00187719	0	0	0	0.00165588	0.00147148	0	0.00113107	0	0	0.00168788	0	0.00191913	0	0	0	0	0	0	0	0	0	0	0	0	0	0	0	0	0	0	0.00318102	0	0	0.000831864	0	0	0	0	0	0	0	0	0.00217808	0	0.00152828
OTU_747	___ab638470.1__gi:359804139_ ;k__fungi;p__fungi;c__mortierellomycotina;o__mortierellales;f__mortierellaceae;g__mortierella;s__mortierella sp.;superkingdom__eukaryota;subphylum__mortierellomycotina	0	0	0	0	0	0	0	0	0	0.00113107	0	0	0.00168788	0	0	0	0	0	0	0	0	0	0	0	0.00451565	0	0	0	0	0	0	0	0	0	0	0	0	0	0	0	0	0	0	0.00154938	0	0	0	0.00152828
OTU_748	___hq406815.1__gi:311404309_ ;k__fungi;p__fungi;c__mucoromycotina;o__mucorales;f__mucoraceae;g__ambomucor;s__ambomucor seriatoinflatus;superkingdom__eukaryota;subphylum__mucoromycotina;suborder__mucorineae	0	0	0	0	0.00153435	0.00270695	0.00496763	0	0	0	0	0.002503	0	0.00244016	0	0.00158929	0.00132165	0	0	0.00155778	0	0	0	0	0	0	0	0	0.00143841	0	0	0	0	0	0	0.00155848	0	0	0	0	0	0	0.000915189	0.00154938	0	0	0	0
OTU_749	___dq189222.1__gi:76150856_ ;k__fungi;p__ascomycota;c__saccharomycetes;o__saccharomycetales;f__dipodascaceae;g__galactomyces;s__galactomyces geotrichum;subphylum__saccharomycotina;subkingdom__dikarya;superkingdom__eukaryota	0	0	0	0	0	0	0	0	0	0	0	0	0	0	0	0	0	0.00125221	0	0	0	0	0	0	0	0	0	0	0	0	0	0	0	0	0	0.00155848	0	0	0	0	0.00386885	0	0	0	0	0	0	0
OTU_750	___ab505424.1__gi:238636872_ ;k__fungi;p__ascomycota;c__eurotiomycetes;o__eurotiales;f__aspergillaceae;g__penicillium;s__penicillium sp.;subclass eurotiomycetidae;subphylum__pezizomycotina;subkingdom__dikarya;superkingdom__eukaryota	0	0	0	0	0	0.00135347	0.00496763	0	0	0	0	0	0	0.00244016	0	0	0	0	0	0	0.00293161	0	0	0	0.00090313	0	0	0	0	0.00352734	0	0.00573427	0	0	0	0	0	0	0	0	0	0	0	0	0	0	0	0
OTU_752	___hm208713.1__gi:300915763_ ;k__fungi;p__ascomycota;c__dothideomycetes;o__pleosporales;f__cucurbitariaceae;g__pyrenochaeta;s__pyrenochaeta sp.;suborder__pleosporineae;subclass pleosporomycetidae;subphylum__pezizomycotina;subkingdom__dikarya;superkingdom__eukaryota	0	0	0	0.00247629	0.00153435	0	0	0	0.026005	0	0	0	0	0	0	0.00158929	0	0	0	0	0	0	0	0	0	0	0	0	0	0	0	0	0	0	0	0	0	0	0	0	0	0	0	0	0	0	0	0
OTU_753	___af491556.1__gi:25045988_ ;k__fungi;p__ascomycota;c__pezizomycetes;o__pezizales;f__pezizaceae;g__peziza;s__peziza varia;subphylum__pezizomycotina;subkingdom__dikarya;superkingdom__eukaryota	0	0	0	0	0	0	0	0.00147148	0	0	0	0	0	0	0	0	0	0	0	0	0	0	0	0	0	0	0	0	0	0	0	0	0.00230808	0	0	0.00155848	0	0	0	0	0	0.0501063	0	0	0	0	0	0
OTU_754	___jf439467.1__gi:328923717_ ;k__fungi;p__ascomycota;c__sordariomycetes;o__sordariales;f__chaetomiaceae;g__chaetomium;s__chaetomium nigricolor;subclass sordariomycetidae;subphylum__pezizomycotina;subkingdom__dikarya;superkingdom__eukaryota	0.0012069	0	0	0	0	0	0	0	0.00152971	0	0	0.0012515	0.00337576	0	0.00191913	0	0	0	0	0	0	0.0024499	0	0	0	0.00164549	0	0	0	0	0	0	0	0	0	0	0	0	0	0	0	0	0	0	0	0	0	0
OTU_755	___u51964.1__gi:2951997_ ;k__fungi;p__ascomycota;c__orbiliomycetes;o__orbiliales;f__orbiliaceae;g__dactylella;s__dactylella copepodii;subphylum__pezizomycotina;subkingdom__dikarya;superkingdom__eukaryota	0	0	0	0	0	0	0	0	0	0	0	0	0	0	0	0	0	0	0	0	0	0	0	0	0.0252876	0	0	0	0.00143841	0	0	0	0	0	0	0	0	0	0	0	0	0	0	0	0	0	0	0
OTU_757	___dq307332.1__gi:86517069_ ;k__fungi;p__ascomycota;c__dothideomycetes;o__venturiales;f__sympoventuriaceae;g__ochroconis;s__ochroconis humicola;subphylum__pezizomycotina;subkingdom__dikarya;superkingdom__eukaryota	0.0012069	0	0	0	0.00153435	0	0	0	0	0	0	0	0.00337576	0	0	0	0	0	0.00322872	0	0	0	0	0	0.00632191	0	0	0	0.00431524	0	0	0	0.00230808	0	0	0	0	0	0	0	0	0	0.00457595	0	0	0	0	0
OTU_758	lewia infectoria ;k__fungi;p__ascomycota;c__dothideomycetes;o__pleosporales;f__pleosporaceae;g__alternaria;s__lewia infectoria;suborder__pleosporineae;subclass pleosporomycetidae;subphylum__pezizomycotina;subkingdom__dikarya;superkingdom__eukaryota	0	0	0	0.00495258	0.0107405	0.00135347	0	0.00147148	0	0	0.014415	0	0	0	0	0.00158929	0	0.00125221	0	0	0	0	0	0	0	0	0	0	0	0	0	0	0	0	0	0	0	0	0	0	0	0	0	0	0	0	0	0.00611312
OTU_759	___eu484055.1__gi:169656201_ ;k__fungi;p__ascomycota;c__saccharomycetes;o__saccharomycetales;f__debaryomycetaceae;g__candida;s__candida metapsilosis;subphylum__saccharomycotina;subkingdom__dikarya;superkingdom__eukaryota	0.0024138	0	0.00187719	0.00247629	0	0	0	0	0	0	0	0.0012515	0	0	0.00191913	0	0	0	0	0	0	0	0	0	0	0	0	0.00188882	0	0.00176367	0	0	0.00230808	0	0	0	0.000831864	0	0	0	0.00193442	0	0	0	0	0	0	0.00152828
OTU_760	___dq189222.1__gi:76150856_ ;k__fungi;p__ascomycota;c__saccharomycetes;o__saccharomycetales;f__dipodascaceae;g__galactomyces;s__galactomyces geotrichum;subphylum__saccharomycotina;subkingdom__dikarya;superkingdom__eukaryota	0	0	0	0	0	0	0	0	0	0	0	0	0	0	0	0	0	0	0	0	0	0	0	0	0	0	0	0	0	0	0	0	0	0	0	0	0	0	0	0.00116054	0.00386885	0	0	0	0	0	0	0
OTU_761	___af106533.1__gi:5139066_ ;k__fungi;p__ascomycota;c__orbiliomycetes;o__orbiliales;f__orbiliaceae;g__arthrobotrys;s__arthrobotrys amerospora;subphylum__pezizomycotina;subkingdom__dikarya;superkingdom__eukaryota	0	0	0	0	0	0	0	0	0	0	0	0	0	0	0.00191913	0	0	0	0	0	0.00293161	0	0	0	0.00180626	0	0	0	0	0	0.00196198	0	0	0	0	0	0.000831864	0	0	0	0	0	0.000915189	0	0	0	0	0
OTU_762	___dq375491.1__gi:87082851_ ;k__fungi;p__ascomycota;c__pezizomycetes;o__pezizales;f__tuberaceae;g__tuber;s__tuber indicum;subphylum__pezizomycotina;subkingdom__dikarya;superkingdom__eukaryota	0	0	0	0.00742887	0	0	0	0	0	0	0	0	0	0	0	0	0	0	0	0.00155778	0	0	0	0	0	0	0	0	0	0	0	0	0.00923233	0.00159051	0	0.00155848	0	0	0.00280749	0	0	0	0	0	0	0	0.00173223	0.00152828
OTU_763	___ef601603.1__gi:148633605_ ;k__fungi;p__ascomycota;c__sordariomycetes;o__lulworthiales;f__lulworthiaceae;g__zalerion;s__zalerion sp.;subphylum__pezizomycotina;subkingdom__dikarya;superkingdom__eukaryota	0.0024138	0.00374511	0.00563158	0	0	0.00135347	0	0	0.00152971	0	0.00110884	0	0	0	0	0	0	0.00125221	0.00161436	0	0.00439741	0	0	0	0.00180626	0.00164549	0.00351309	0	0	0.00529101	0	0	0	0	0.00488313	0.00467545	0	0	0.00280749	0	0	0	0.00732152	0.00619751	0	0.00217808	0.00346446	0.00305656
OTU_764	cordyceps taishanensis ;k__fungi;p__ascomycota;c__sordariomycetes;o__hypocreales;f__cordycipitaceae;g__cordyceps;s__cordyceps taishanensis;subclass hypocreomycetidae;subphylum__pezizomycotina;subkingdom__dikarya;superkingdom__eukaryota	0.0012069	0.00187255	0.00187719	0	0	0	0	0	0	0	0	0	0.00168788	0	0.00383826	0	0	0	0	0	0	0	0	0	0.00090313	0	0.00175654	0	0	0.00529101	0	0	0.00230808	0	0	0.00155848	0.000831864	0	0	0	0	0	0.00274557	0	0	0	0	0.00152828
OTU_765	___hm116748.1__gi:298683520_ ;k__fungi;p__ascomycota;c__leotiomycetes;o__helotiales;f__helotiales;g__cadophora;s__cadophora luteo_olivacea;superkingdom__eukaryota;subkingdom__dikarya;subphylum__pezizomycotina	0	0	0.00187719	0.00247629	0	0	0	0	0	0	0	0	0	0	0	0	0	0	0	0	0	0	0.00113487	0	0.00451565	0	0	0	0	0	0	0	0.00230808	0	0	0	0	0	0	0	0	0	0	0	0	0	0	0.00458484
OTU_766	sarocladium strictum ;k__fungi;p__ascomycota;c__sordariomycetes;o__hypocreales;f__hypocreales;g__sarocladium;s__sarocladium strictum;superkingdom__eukaryota;subkingdom__dikarya;subphylum__pezizomycotina;subclass hypocreomycetidae	0.0012069	0	0	0	0	0	0	0	0.00152971	0	0	0	0	0	0	0	0	0.00125221	0	0	0	0	0	0	0.00180626	0	0	0	0	0	0	0	0	0	0.00325542	0	0	0	0	0	0	0	0.000915189	0	0	0	0.00173223	0
OTU_767	___eu352773.1__gi:164421754_ ;k__fungi;p__chytridiomycota;c__chytridiomycetes;o__lobulomycetales;f__lobulomycetaceae;g__clydaea;s__clydaea vesicula;superkingdom__eukaryota	0	0	0	0	0	0	0	0.00147148	0	0	0	0	0	0	0	0	0	0	0	0	0	0	0	0	0	0	0	0	0	0	0	0.103217	0	0	0	0	0	0	0	0	0	0	0	0	0	0	0	0
OTU_768	___eu352773.1__gi:164421754_ ;k__fungi;p__chytridiomycota;c__chytridiomycetes;o__lobulomycetales;f__lobulomycetaceae;g__clydaea;s__clydaea vesicula;superkingdom__eukaryota	0	0	0	0	0	0	0.00331175	0	0	0	0	0	0.00168788	0	0.00383826	0	0	0.00125221	0	0	0	0	0	0	0	0	0	0	0	0.00352734	0.00392395	0	0	0.00159051	0	0	0	0.00469076	0	0	0	0	0.00549114	0	0	0	0	0.00152828
OTU_769	___am087246.1__gi:114414790_ ;k__fungi;p__basidiomycota;c__agaricomycetes;o__cantharellales;f__hydnaceae;g__hydnum;s__hydnum rufescens;subkingdom__dikarya;superkingdom__eukaryota	0.0036207	0.00749022	0.00187719	0	0	0	0.00331175	0	0.00152971	0	0	0	0.0151909	0	0	0	0	0	0.00161436	0.00155778	0.00439741	0	0	0	0	0.00329099	0	0	0	0	0	0	0.00230808	0	0	0	0.00332745	0	0	0	0	0	0	0	0.00724498	0	0.00692893	0.00305656
OTU_770	___xm_001260090.1__gi:119480124_ ;k__fungi;p__ascomycota;c__eurotiomycetes;o__eurotiales;f__aspergillaceae;g__neosartorya;s__neosartorya fischeri;subclass eurotiomycetidae;subphylum__pezizomycotina;subkingdom__dikarya;superkingdom__eukaryota	0	0	0	0	0	0	0	0	0	0	0	0	0.0303818	0	0	0	0	0	0	0	0	0	0	0	0	0	0	0	0	0	0	0	0	0	0.00162771	0	0	0	0	0	0	0	0.000915189	0.00154938	0	0	0	0
OTU_771	___fj903335.1__gi:237641554_ ;k__fungi;p__ascomycota;c__dothideomycetes;o__pleosporales;f__didymellaceae;g__phoma;s__phoma sp.;suborder__pleosporineae;subclass pleosporomycetidae;subphylum__pezizomycotina;subkingdom__dikarya;superkingdom__eukaryota	0	0	0.00375439	0	0	0	0	0.0176577	0.00152971	0.00113107	0	0	0	0	0.00191913	0	0	0	0.00161436	0	0	0	0	0	0	0.00493648	0	0	0.00287683	0	0	0	0	0	0	0	0.000831864	0	0	0	0	0	0	0	0	0	0	0
OTU_772	___ef211128.1__gi:122888932_ ;k__fungi;p__ascomycota;c__eurotiomycetes;o__eurotiales;f__aspergillaceae;g__penicillium;s__penicillium sp.;subclass eurotiomycetidae;subphylum__pezizomycotina;subkingdom__dikarya;superkingdom__eukaryota	0	0	0	0	0	0	0	0	0	0	0	0	0	0	0	0	0	0	0	0	0	0	0	0	0	0	0	0	0	0	0	0	0	0	0	0	0	0	0	0	0	0	0	0	0	0	0	0
OTU_773	___eu669387.1__gi:193297393_ ;k__fungi;p__ascomycota;c__pezizomycetes;o__pezizales;f__pyronemataceae;g__pseudaleuria;s__pseudaleuria quinaultiana;subphylum__pezizomycotina;subkingdom__dikarya;superkingdom__eukaryota	0	0	0	0	0	0	0.0066235	0.0058859	0.0351833	0	0	0	0	0	0	0	0	0	0	0	0	0	0	0	0	0	0	0	0	0	0	0	0	0	0	0	0	0	0	0	0	0	0	0	0	0	0	0
OTU_774	___am262431.1__gi:95136112_ ;k__fungi;p__ascomycota;c__dothideomycetes;o__dothideales;f__dothioraceae;g__hormonema;s__hormonema sp.;subclass dothideomycetidae;subphylum__pezizomycotina;subkingdom__dikarya;superkingdom__eukaryota	0	0	0	0	0	0.00135347	0	0	0	0	0	0	0.00675151	0	0	0	0	0	0	0	0.0014658	0	0	0	0	0	0	0	0	0	0.00392395	0	0	0.00159051	0	0	0	0	0	0	0	0	0	0	0	0	0.00173223	0
OTU_775	___fj774081.1__gi:257449434_ ;k__fungi;p__basidiomycota;c__agaricomycetes;o__agaricales;f__pluteaceae;g__pluteus;s__pluteus nanus;subclass agaricomycetidae;subkingdom__dikarya;superkingdom__eukaryota	0	0	0	0	0	0	0	0	0	0	0	0	0	0	0	0	0	0	0	0	0	0	0	0.00070278	0.00270939	0	0	0	0	0	0	0	0	0	0	0.00155848	0	0	0	0	0	0	0.00183038	0	0	0	0	0.00152828
OTU_777	diplodia seriata ;k__fungi;p__ascomycota;c__dothideomycetes;o__botryosphaeriales;f__botryosphaeriaceae;g__diplodia;s__diplodia seriata;subphylum__pezizomycotina;subkingdom__dikarya;superkingdom__eukaryota	0	0.00187255	0	0.0148577	0.0138092	0.0162417	0	0	0	0	0.00110884	0	0	0	0	0	0.0026433	0	0	0	0.0014658	0.000816633	0	0	0	0	0	0	0	0	0	0	0	0	0	0	0	0	0	0	0	0	0	0	0	0	0	0
OTU_778	___eu273554.1__gi:162136060_ ;k__fungi;p__ascomycota;c__sordariomycetes;o__hypocreales;f__nectriaceae;g__stephanonectria;s__stephanonectria keithii;subclass hypocreomycetidae;subphylum__pezizomycotina;subkingdom__dikarya;superkingdom__eukaryota	0	0.00187255	0	0	0	0	0	0.00147148	0.00611883	0	0	0	0	0	0	0	0	0	0	0	0.0014658	0	0.00113487	0	0	0	0	0	0	0	0	0	0	0	0	0	0.00332745	0	0	0	0	0	0.00183038	0.00154938	0	0	0	0
OTU_779	pseudeurotium sp. 02nh04 ;k__fungi;p__ascomycota;c__leotiomycetes;o__leotiomycetes;f__pseudeurotiaceae;g__pseudeurotium;s__pseudeurotium sp.;superkingdom__eukaryota;subkingdom__dikarya;subphylum__pezizomycotina	0.0024138	0	0.00187719	0	0.00153435	0	0.00165588	0	0	0	0	0	0.00168788	0.00244016	0.00383826	0	0	0	0.00161436	0.00467333	0	0	0	0	0.00180626	0	0	0	0	0.00352734	0	0	0.00461617	0	0.00488313	0	0.000831864	0	0	0	0	0	0.00183038	0.00309876	0	0.00435616	0.00173223	0
OTU_782	___dq520096.1__gi:99866600_ ;k__fungi;p__basidiomycota;c__agaricomycetes;o__sebacinales;f__sebacinales;g__serendipita;s__sebacina vermifera;superkingdom__eukaryota;subkingdom__dikarya	0.00482759	0	0	0	0	0	0	0	0	0	0	0	0.0253182	0	0	0	0	0	0	0	0	0.000816633	0	0	0	0	0	0	0	0	0	0	0	0	0	0	0	0	0	0	0	0	0	0	0	0	0.00173223	0
OTU_783	___fj792583.1__gi:225675529_ ;k__fungi;p__ascomycota;c__pezizomycetes;o__pezizales;f__ascodesmidaceae;g__cephaliophora;s__cephaliophora tropica;subphylum__pezizomycotina;subkingdom__dikarya;superkingdom__eukaryota	0	0	0	0	0	0	0	0	0	0	0	0.0012515	0	0	0	0	0	0	0	0	0	0	0	0	0	0	0	0	0	0	0	0	0	0	0	0	0	0	0	0	0	0	0	0	0	0	0	0.00458484
OTU_784	cordyceps taishanensis ;k__fungi;p__ascomycota;c__sordariomycetes;o__hypocreales;f__cordycipitaceae;g__cordyceps;s__cordyceps taishanensis;subclass hypocreomycetidae;subphylum__pezizomycotina;subkingdom__dikarya;superkingdom__eukaryota	0	0	0	0	0	0	0.00331175	0	0	0	0	0	0.00168788	0	0	0	0.00132165	0	0.00161436	0	0	0	0	0	0	0.00164549	0.00175654	0	0	0	0	0	0	0.00159051	0.00162771	0.00155848	0	0.00234538	0.00561498	0	0	0	0	0	0	0	0	0
OTU_788	___dq485685.1__gi:94995537_ ;k__fungi;p__chytridiomycota;c__chytridiomycetes;o__rhizophydiales;f__rhizophydiaceae;g__rhizophydium;s__rhizophydium sp.;superkingdom__eukaryota	0	0	0	0.00495258	0	0	0	0	0.0122377	0	0	0	0.00337576	0	0	0	0	0	0	0	0	0	0	0	0	0	0.00351309	0.00188882	0.00143841	0.00176367	0	0	0	0	0	0	0	0	0	0	0	0	0	0	0	0	0	0
OTU_790	___eu002899.1__gi:157741894_ ;k__fungi;p__basidiomycota;c__microbotryomycetes;o__sporidiobolales;f__sporidiobolales;g__sporobolomyces;s__sporobolomyces sp.;superkingdom__eukaryota;subkingdom__dikarya;subphylum__pucciniomycotina	0	0	0	0	0	0	0	0	0	0	0	0	0	0	0	0	0	0	0	0	0	0	0.00113487	0	0	0	0	0	0	0	0	0	0	0	0	0	0	0	0	0	0	0	0	0	0	0	0	0
OTU_791	agonimia allobata ;k__fungi;p__ascomycota;c__eurotiomycetes;o__verrucariales;f__verrucariaceae;g__agonimia;s__agonimia allobata;subclass chaetothyriomycetidae;subphylum__pezizomycotina;subkingdom__dikarya;superkingdom__eukaryota	0.00482759	0.0112353	0.00375439	0.00247629	0.00153435	0	0.00827938	0	0.00305941	0	0.00110884	0	0.00675151	0.00488031	0.00383826	0	0	0	0.00322872	0	0	0	0.00113487	0	0.00451565	0.00658198	0.00351309	0	0.00143841	0.00176367	0.00392395	0	0.00230808	0.00159051	0	0	0.000831864	0.00234538	0.00280749	0	0	0	0.000915189	0	0	0.00653424	0.00173223	0.00152828
OTU_792	candida sp. imb_p1 ;k__fungi;p__ascomycota;c__saccharomycetes;o__saccharomycetales;f__saccharomycetales;g__candida;s__candida sp.;superkingdom__eukaryota;subkingdom__dikarya;subphylum__saccharomycotina	0	0.00187255	0	0	0	0	0	0.00441443	0	0	0	0	0	0	0	0	0.00925155	0	0	0	0	0	0	0	0.00722504	0	0	0	0	0	0	0.0258042	0	0	0	0	0	0	0	0	0	0	0	0	0.00965997	0	0	0
OTU_793	___ay999117.1__gi:67644092_ ;k__fungi;p__ascomycota;c__sordariomycetes;o__sordariales;f__lasiosphaeriaceae;g__schizothecium;s__schizothecium inaequale;subclass sordariomycetidae;subphylum__pezizomycotina;subkingdom__dikarya;superkingdom__eukaryota	0	0	0	0	0	0	0	0	0	0	0	0	0	0	0	0	0	0	0	0	0	0	0	0	0	0	0	0	0	0	0	0	0	0	0	0	0	0	0	0	0	0	0	0	0	0.00217808	0	0
OTU_794	mortierella sp. 11ma04 ;k__fungi;p__fungi;c__mortierellomycotina;o__mortierellales;f__mortierellaceae;g__mortierella;s__mortierella sp.;superkingdom__eukaryota;subphylum__mortierellomycotina	0.0012069	0.00187255	0.00187719	0	0	0	0.00165588	0	0	0	0.00110884	0	0	0.00244016	0	0.00158929	0	0	0	0.00155778	0	0	0.00113487	0	0.00090313	0	0	0	0	0	0.00196198	0	0.00230808	0	0	0	0.000831864	0	0	0	0	0	0	0	0	0	0.00173223	0
OTU_795	sarcogyne privigna ;k__fungi;p__ascomycota;c__lecanoromycetes;o__acarosporales;f__acarosporaceae;g__sarcogyne;s__sarcogyne privigna;subclass acarosporomycetidae;subphylum__pezizomycotina;subkingdom__dikarya;superkingdom__eukaryota	0.0012069	0	0	0	0	0	0.00165588	0	0.00152971	0	0	0	0	0	0	0	0	0	0	0.00311556	0	0	0.00113487	0	0	0	0.00702617	0	0	0	0	0	0	0	0	0	0.00166373	0	0	0	0	0	0.00183038	0	0	0	0	0
OTU_797	___eu379236.1__gi:166178866_ ;k__fungi;p__chytridiomycota;c__chytridiomycetes;o__rhizophlyctidales;f__rhizophlyctidaceae;g__rhizophlyctis;s__rhizophlyctis rosea;superkingdom__eukaryota	0	0	0.00187719	0.00247629	0	0.00270695	0	0	0	0	0.00110884	0	0.013503	0.0219614	0	0	0	0.00125221	0	0.00155778	0	0	0	0	0.00451565	0	0	0	0	0	0	0	0	0	0	0	0	0	0	0	0	0	0	0	0	0	0	0
OTU_798	fungal sp. ksl3 ;k__fungi;p__cryptomycota;c__cryptomycota;o__cryptomycota;f__cryptomycota;g__paramicrosporidium;s__fungal sp.;superkingdom__eukaryota	0	0	0	0	0	0	0	0	0	0	0	0	0	0	0	0	0	0	0	0	0	0	0	0	0	0	0	0	0	0	0	0	0	0	0	0	0	0	0	0	0	0	0	0	0	0	0	0
OTU_801	___fj224113.1__gi:238695576_ ;k__fungi;p__ascomycota;c__sordariomycetes;o__hypocreales;f__hypocreales;g__eucasphaeria;s__eucasphaeria capensis;superkingdom__eukaryota;subkingdom__dikarya;subphylum__pezizomycotina;subclass hypocreomycetidae	0.0012069	0.00187255	0	0	0	0	0	0	0	0	0	0	0	0	0	0	0	0	0	0	0	0	0	0	0	0.00164549	0	0	0	0	0	0.00286714	0.00461617	0.00318102	0	0.00311696	0	0.00234538	0.00842247	0	0	0	0	0	0.00724498	0	0	0
OTU_802	___hm161456.1__gi:310706509_ ;k__fungi;p__ascomycota;c__lecanoromycetes;o__umbilicariales;f__umbilicariaceae;g__lasallia;s__lasallia pustulata;subclass umbilicariomycetidae;subphylum__pezizomycotina;subkingdom__dikarya;superkingdom__eukaryota	0	0	0.00375439	0	0.00306871	0	0	0	0	0	0	0	0	0.00244016	0	0	0	0	0	0	0	0	0	0.00070278	0.00180626	0	0.00351309	0	0	0	0	0	0	0	0	0	0	0	0	0	0	0	0	0	0	0	0	0
OTU_803	___hq888720.1__gi:321173739_ ;k__fungi;p__blastocladiomycota;c__blastocladiomycetes;o__blastocladiales;f__blastocladiaceae;g__allomyces;s__allomyces javanicus;superkingdom__eukaryota	0	0.00561766	0	0	0.00306871	0	0	0.00147148	0.00764853	0	0	0	0	0	0	0	0	0	0.00322872	0	0	0	0	0	0.00270939	0	0	0	0.00143841	0	0	0	0	0.00159051	0	0	0	0.00234538	0	0	0	0	0.000915189	0	0	0	0	0
OTU_805	___hq608007.1__gi:312434485_ ;k__fungi;p__ascomycota;c__sordariomycetes;o__sordariales;f__chaetomiaceae;g__humicola;s__humicola sp.;subclass sordariomycetidae;subphylum__pezizomycotina;subkingdom__dikarya;superkingdom__eukaryota	0	0	0	0	0	0	0	0	0	0	0	0	0	0	0.0345443	0	0.00132165	0	0	0	0	0	0	0	0.00451565	0	0	0	0	0	0	0	0	0	0.00976626	0	0	0	0	0	0	0	0	0	0	0	0.00346446	0
OTU_806	___dq485617.1__gi:94995469_ ;k__fungi;p__chytridiomycota;c__chytridiomycetes;o__rhizophydiales;f__rhizophydiales;g__operculomyces;s__rhizophydium sp.;superkingdom__eukaryota	0	0	0.00187719	0.00247629	0	0	0	0.00294295	0.00152971	0	0	0	0.00337576	0	0.00767651	0	0	0	0	0	0	0	0	0	0.00090313	0	0	0	0.00431524	0	0	0	0	0	0	0	0	0.00938152	0	0	0	0	0	0	0	0	0	0
OTU_807	___hq607814.1__gi:312434294_ ;k__fungi;p__ascomycota;c__dothideomycetes;o__botryosphaeriales;f__botryosphaeriaceae;g__botryosphaeria;s__botryosphaeria sp.;subphylum__pezizomycotina;subkingdom__dikarya;superkingdom__eukaryota	0.0012069	0	0	0	0	0	0	0.00147148	0	0	0	0	0.00506363	0	0	0	0	0	0	0	0	0.000816633	0	0	0.00090313	0	0	0	0	0	0	0	0	0	0.00162771	0	0	0	0	0	0	0	0	0.00154938	0	0	0.00173223	0.00305656
OTU_808	___ay313953.1__gi:35375858_ ;k__fungi;p__ascomycota;c__dothideomycetes;o__pleosporales;f__pleomassariaceae;g__asteromassaria;s__asteromassaria olivaceohirta;subclass pleosporomycetidae;subphylum__pezizomycotina;subkingdom__dikarya;superkingdom__eukaryota	0.0036207	0	0	0	0	0	0	0	0.00305941	0	0	0	0	0	0	0	0.00132165	0	0	0.00155778	0	0	0	0	0	0.0329099	0	0	0	0	0	0	0	0	0	0	0	0	0	0	0	0	0	0.00154938	0	0	0	0
OTU_809	___af345824.1__gi:19070325_ ;k__fungi;p__basidiomycota;c__agaricomycetes;o__agaricales;f__psathyrellaceae;g__coprinellus;s__coprinellus bisporus;subclass agaricomycetidae;subkingdom__dikarya;superkingdom__eukaryota	0.0012069	0	0.00187719	0	0	0	0	0	0	0	0.00110884	0	0	0	0	0	0	0	0	0	0	0	0	0.00070278	0	0.00164549	0	0	0	0	0	0	0	0	0	0	0	0	0	0	0.00193442	0.0352098	0	0	0	0	0	0
OTU_810	___hm046876.1__gi:302595111_ ;k__fungi;p__basidiomycota;c__agaricomycetes;o__corticiales;f__vuilleminiaceae;g__austrovuilleminia;s__australovuilleminia coccinea;subkingdom__dikarya;superkingdom__eukaryota	0.0012069	0	0	0	0	0	0	0	0	0	0	0	0	0	0	0	0	0	0.00161436	0	0	0	0	0	0	0	0	0	0	0	0	0	0	0	0	0	0	0	0	0	0	0	0	0	0	0	0	0
OTU_811	___ay997089.1__gi:62866695_ ;k__fungi;p__fungi;c__kickxellomycotina;o__harpellales;f__legeriomycetaceae;g__zancudomyces;s__smittium culisetae;superkingdom__eukaryota;subphylum__kickxellomycotina	0	0.00187255	0	0	0	0	0	0	0	0	0	0	0	0	0	0	0	0	0	0	0.00293161	0	0	0	0	0	0.00351309	0	0	0.00352734	0	0	0	0	0	0	0.000831864	0	0	0	0	0	0	0	0	0	0	0
OTU_812	___ab067714.1__gi:29466986_ ;k__fungi;p__ascomycota;c__sordariomycetes;o__hypocreales;f__ophiocordycipitaceae;g__ophiocordyceps;s__ophiocordyceps crassispora;subclass hypocreomycetidae;subphylum__pezizomycotina;subkingdom__dikarya;superkingdom__eukaryota	0	0	0	0	0	0	0	0	0	0	0	0	0	0	0	0.00158929	0	0.00125221	0	0	0	0.000816633	0	0	0	0	0	0.00377765	0	0	0	0	0	0	0	0	0.00166373	0	0	0	0	0	0	0	0	0	0	0.00305656
OTU_813	___gu586858.1__gi:299891162_ ;k__fungi;p__ascomycota;c__eurotiomycetes;o__chaetothyriales;f__herpotrichiellaceae;g__exophiala;s__exophiala salmonis;subclass chaetothyriomycetidae;subphylum__pezizomycotina;subkingdom__dikarya;superkingdom__eukaryota	0	0	0	0.00247629	0	0	0	0	0.00152971	0	0	0	0	0	0	0	0	0.00125221	0	0	0	0.000816633	0	0	0.00090313	0	0	0	0	0	0	0.00286714	0	0	0	0	0	0	0	0.00232107	0	0	0	0	0	0.00217808	0	0
OTU_814	cladosporium sp. stklk11 ;k__fungi;p__ascomycota;c__dothideomycetes;o__capnodiales;f__cladosporiaceae;g__cladosporium;s__cladosporium sp.;subclass dothideomycetidae;subphylum__pezizomycotina;subkingdom__dikarya;superkingdom__eukaryota	0.0036207	0.00187255	0	0	0	0	0.00496763	0	0	0	0.00110884	0	0.00337576	0	0	0	0	0	0.00322872	0.00155778	0	0	0	0	0.00180626	0	0.00175654	0	0	0	0	0	0	0.00159051	0	0	0.000831864	0	0.00280749	0	0	0	0.00274557	0	0	0	0	0.00152828
OTU_815	___dq485617.1__gi:94995469_ ;k__fungi;p__chytridiomycota;c__chytridiomycetes;o__rhizophydiales;f__rhizophydiales;g__operculomyces;s__rhizophydium sp.;superkingdom__eukaryota	0	0	0	0	0.00613742	0	0	0	0	0	0	0	0	0	0	0	0	0	0	0	0	0	0	0	0	0	0.00175654	0	0	0	0	0	0	0	0	0	0	0	0	0	0	0	0.00274557	0	0.012075	0	0	0.00152828
OTU_816	___ab111493.1__gi:31559704_ ;k__fungi;p__ascomycota;c__sordariomycetes;o__hypocreales;f__nectriaceae;g__mariannaea;s__mariannaea elegans;varietas mariannaea elegans var. punicea;subclass hypocreomycetidae;subphylum__pezizomycotina;subkingdom__dikarya;superkingdom__eukaryota	0.0024138	0	0	0	0	0.00135347	0.00165588	0.00147148	0.00152971	0.00113107	0	0.0012515	0.00168788	0	0	0.00317859	0	0.00500883	0.00322872	0.00155778	0.00293161	0.000816633	0.00226974	0	0.00180626	0.00164549	0.0105393	0	0	0	0.00784791	0.00286714	0.00230808	0	0.00325542	0	0.00332745	0.00234538	0	0.00116054	0	0	0	0	0	0.00217808	0.00173223	0
OTU_817	___fj810171.1__gi:226346625_ ;k__fungi;p__basidiomycota;c__agaricomycetes;o__hymenochaetales;f__hymenochaetaceae;g__hymenochaete;s__hymenochaete adusta;subkingdom__dikarya;superkingdom__eukaryota	0	0	0	0	0	0.00135347	0.00165588	0	0	0	0	0	0	0	0.00383826	0	0	0	0	0	0	0	0	0	0	0	0	0	0	0	0	0	0	0	0	0	0	0	0	0	0	0	0	0	0	0.00435616	0	0
OTU_819	mastigobasidium intermedium ;k__fungi;p__basidiomycota;c__microbotryomycetes;o__leucosporidiales;f__leucosporidiaceae;g__mastigobasidium;s__mastigobasidium intermedium;subphylum__pucciniomycotina;subkingdom__dikarya;superkingdom__eukaryota	0	0	0.00187719	0	0.00306871	0.00135347	0	0	0	0	0	0	0	0	0	0	0	0.00125221	0	0.00311556	0	0	0	0	0.00090313	0	0	0	0	0	0	0	0	0	0	0	0	0	0	0	0	0	0	0	0.00482998	0	0	0.00152828
OTU_821	___af033344.1__gi:3169884_ ;k__fungi;p__basidiomycota;c__agaricomycetes;o__russulales;f__auriscalpiaceae;g__clavicorona;s__clavicorona taxophila;subkingdom__dikarya;superkingdom__eukaryota	0	0	0.00938597	0	0	0	0	0.00147148	0	0	0.00110884	0	0	0	0	0	0	0	0	0	0	0	0	0	0.00090313	0	0	0	0	0.00176367	0	0	0	0	0	0	0.00166373	0	0.00561498	0	0	0	0	0.00619751	0	0	0	0.00152828
OTU_822	___ef601603.1__gi:148633605_ ;k__fungi;p__ascomycota;c__sordariomycetes;o__lulworthiales;f__lulworthiaceae;g__zalerion;s__zalerion sp.;subphylum__pezizomycotina;subkingdom__dikarya;superkingdom__eukaryota	0	0	0	0.00247629	0	0	0	0	0.00152971	0	0	0	0	0	0	0	0.00132165	0	0.00161436	0.00155778	0	0	0	0.00070278	0	0	0.00175654	0	0.00143841	0	0.00196198	0	0	0	0	0	0	0	0	0	0	0	0.000915189	0	0	0	0	0.00305656
OTU_823	___hm534895.1__gi:321368922_ ;k__fungi;p__ascomycota;c__sordariomycetes;o__sordariomycetes;f__sordariomycetes;g__thyronectria;s__nectria coryli;superkingdom__eukaryota;subkingdom__dikarya;subphylum__pezizomycotina	0	0	0	0	0	0	0	0	0	0	0	0	0.00506363	0	0.00191913	0	0	0	0.00161436	0	0	0	0	0	0	0.00164549	0.00175654	0	0	0	0	0	0	0.00318102	0	0	0	0	0	0	0	0	0.00549114	0.012395	0	0	0	0
OTU_824	___jf340240.1__gi:327180222_ ;k__fungi;p__ascomycota;c__sordariomycetes;o__hypocreales;f__nectriaceae;g__mariannaea;s__mariannaea elegans;subclass hypocreomycetidae;subphylum__pezizomycotina;subkingdom__dikarya;superkingdom__eukaryota	0	0.00374511	0	0	0	0	0	0	0	0	0	0	0	0	0.00191913	0	0	0	0	0.00467333	0	0	0	0	0	0	0.00175654	0.00188882	0	0	0	0	0	0	0	0	0.00499118	0	0	0	0	0	0.00274557	0	0	0	0	0
OTU_825	___ay864822.1__gi:57867892_ ;k__fungi;p__ascomycota;c__dothideomycetes;o__pleosporales;f__didymellaceae;g__phoma;s__phoma herbarum;suborder__pleosporineae;subclass pleosporomycetidae;subphylum__pezizomycotina;subkingdom__dikarya;superkingdom__eukaryota	0	0	0	0.00742887	0.00460306	0.0175951	0	0	0	0	0	0	0	0	0.00191913	0.00953577	0	0	0.00161436	0.00155778	0	0	0	0.00210834	0	0	0.00175654	0	0	0	0	0	0	0	0	0	0	0	0	0.00116054	0	0	0	0	0	0	0	0
OTU_826	___ay999126.1__gi:67644101_ ;k__fungi;p__ascomycota;c__sordariomycetes;o__sordariales;f__lasiosphaeriaceae;g__podospora;s__podospora appendiculata;subclass sordariomycetidae;subphylum__pezizomycotina;subkingdom__dikarya;superkingdom__eukaryota	0	0	0	0	0	0	0	0	0	0	0	0	0	0	0	0	0	0	0	0	0	0	0	0	0	0	0	0	0	0	0	0	0	0	0	0	0	0	0	0.00116054	0.0270819	0	0	0	0	0	0	0
OTU_827	___hq115712.1__gi:304651454_ ;k__fungi;p__ascomycota;c__sordariomycetes;o__coniochaetales;f__coniochaetaceae;g__coniochaeta;s__lecythophora sp.;subclass sordariomycetidae;subphylum__pezizomycotina;subkingdom__dikarya;superkingdom__eukaryota	0	0	0	0	0	0	0	0	0	0	0	0	0	0.00244016	0	0	0	0	0	0	0	0	0	0	0.00451565	0	0.00175654	0	0	0	0	0	0	0	0	0	0	0	0	0	0	0	0	0	0	0.00217808	0.00173223	0.00305656
OTU_828	___hq441575.1__gi:332015803_ ;k__fungi;p__basidiomycota;c__agaricomycetes;o__cantharellales;f__ceratobasidiaceae;g__thanatephorus;s__thanatephorus fusisporus;subkingdom__dikarya;superkingdom__eukaryota	0	0	0	0	0	0	0.00331175	0	0	0	0	0.0012515	0	0	0.00767651	0	0.00132165	0	0.00161436	0	0	0	0	0	0	0	0.00175654	0	0	0	0.00196198	0	0.00692425	0	0	0	0.00166373	0	0	0	0	0	0.000915189	0	0	0	0	0.00916969
OTU_829	cudoniella clavus ;k__fungi;p__ascomycota;c__leotiomycetes;o__helotiales;f__helotiaceae;g__cudoniella;s__cudoniella clavus;subphylum__pezizomycotina;subkingdom__dikarya;superkingdom__eukaryota	0	0	0	0	0	0	0.00165588	0	0.00152971	0	0	0	0	0	0	0	0	0	0	0	0	0.000816633	0	0	0	0	0	0	0	0.00176367	0.00196198	0	0	0	0.00162771	0	0.000831864	0	0	0	0	0	0	0	0	0	0	0.00152828
OTU_831	___af444322.1__gi:20378383_ ;k__fungi;p__basidiomycota;c__tremellomycetes;o__cystofilobasidiales;f__cystofilobasidiaceae;g__cryptococcus;s__cryptococcus huempii;subkingdom__dikarya;superkingdom__eukaryota	0.00844829	0.00187255	0	0	0	0	0.00165588	0.00147148	0	0	0	0.0012515	0	0.00488031	0.00191913	0	0	0	0.00161436	0.00155778	0.00293161	0	0	0	0.00090313	0	0.00351309	0	0	0	0	0.00286714	0	0	0	0	0	0	0	0	0	0	0.000915189	0.00464814	0	0	0	0
OTU_833	___ay667486.1__gi:50313401_ ;k__fungi;p__ascomycota;c__sordariomycetes;o__hypocreales;f__nectriaceae;g__fusarium;s__fusarium oxysporum;subclass hypocreomycetidae;subphylum__pezizomycotina;subkingdom__dikarya;superkingdom__eukaryota	0	0	0.00187719	0	0.00153435	0.00135347	0.00165588	0.00147148	0.00152971	0.00113107	0	0	0	0.00244016	0	0.00158929	0	0.00250441	0	0	0	0.000816633	0	0	0	0	0	0	0	0	0.00196198	0	0	0	0	0	0	0	0	0	0	0	0	0	0	0.00435616	0	0
OTU_836	mortierella alpina ;k__fungi;p__fungi;c__mortierellomycotina;o__mortierellales;f__mortierellaceae;g__mortierella;s__mortierella alpina;superkingdom__eukaryota;subphylum__mortierellomycotina	0.0012069	0	0	0	0.00153435	0	0	0	0	0	0	0	0	0	0	0	0	0	0	0	0	0	0.00226974	0	0	0	0	0	0	0	0	0	0	0	0.00162771	0	0	0	0	0	0	0	0	0.00309876	0	0	0	0.00305656
OTU_838	___dq681321.1__gi:110734712_ ;k__fungi;p__ascomycota;c__eurotiomycetes;o__eurotiales;f__aspergillaceae;g__penicillium;s__penicillium glabrum;subclass eurotiomycetidae;subphylum__pezizomycotina;subkingdom__dikarya;superkingdom__eukaryota	0	0.00561766	0	0	0	0.00406042	0	0	0	0	0.00221769	0	0	0	0	0	0	0	0	0	0	0	0	0	0	0	0.00526963	0	0	0	0	0	0	0.00477152	0	0	0.000831864	0	0	0.00116054	0.00193442	0	0	0	0	0	0	0
OTU_839	___ab237662.1__gi:77799484_ ;k__fungi;p__ascomycota;c__sordariomycetes;o__hypocreales;f__nectriaceae;g__fusarium;s__gibberella fujikuroi;subclass hypocreomycetidae;subphylum__pezizomycotina;subkingdom__dikarya;superkingdom__eukaryota	0	0	0	0	0	0	0	0	0	0	0	0	0.00168788	0	0	0	0	0	0.00645745	0	0	0.000816633	0	0	0	0	0	0	0	0	0	0	0.00230808	0	0.00162771	0	0	0	0	0	0	0	0	0	0	0	0	0
OTU_840	___ay587911.1__gi:51104883_ ;k__fungi;p__ascomycota;c__sordariomycetes;o__sordariales;f__lasiosphaeriaceae;g__cercophora;s__cercophora areolata;subclass sordariomycetidae;subphylum__pezizomycotina;subkingdom__dikarya;superkingdom__eukaryota	0	0	0	0	0	0	0	0	0	0	0	0	0	0	0	0	0	0	0	0	0	0	0	0	0	0	0	0	0	0	0	0	0	0.00159051	0	0	0	0	0	0	0.0580327	0	0	0	0	0	0	0
OTU_841	___fj210546.1__gi:226442140_ ;k__fungi;p__basidiomycota;c__tremellomycetes;o__filobasidiales;f__filobasidiales;g__cryptococcus;s__cryptococcus sp.;superkingdom__eukaryota;subkingdom__dikarya	0	0	0	0	0	0	0	0.00147148	0	0.0113107	0	0.0012515	0	0	0	0	0.00132165	0.00125221	0	0	0	0	0.00113487	0.00140556	0.00090313	0	0	0	0	0	0	0	0	0	0	0	0.000831864	0	0	0	0.00193442	0	0	0	0	0.00653424	0	0
OTU_843	___am901698.1__gi:163257633_ ;k__fungi;p__ascomycota;c__sordariomycetes;o__hypocreales;f__hypocreales;g__acremonium;s__acremonium sp.;superkingdom__eukaryota;subkingdom__dikarya;subphylum__pezizomycotina;subclass hypocreomycetidae	0	0	0	0.00495258	0.00613742	0	0	0	0	0	0	0	0	0	0	0	0	0	0	0	0	0	0	0	0	0	0	0	0	0	0	0	0	0	0	0	0	0	0	0	0	0	0	0	0	0	0	0
OTU_844	scolecobasidium sp. hf12231 ;k__fungi;p__ascomycota;c__ascomycota;o__ascomycota;f__ascomycota;g__scolecobasidium;s__scolecobasidium sp.;superkingdom__eukaryota;subkingdom__dikarya	0.0036207	0	0	0	0	0	0	0	0	0	0	0	0	0	0	0	0	0	0	0	0	0	0	0.00070278	0	0	0	0	0	0	0.00196198	0	0	0	0	0	0	0	0	0	0	0	0	0.00309876	0	0.00217808	0	0
OTU_845	___dq375491.1__gi:87082851_ ;k__fungi;p__ascomycota;c__pezizomycetes;o__pezizales;f__tuberaceae;g__tuber;s__tuber indicum;subphylum__pezizomycotina;subkingdom__dikarya;superkingdom__eukaryota	0	0	0	0	0	0.00135347	0	0.00735738	0	0	0	0	0	0	0.00191913	0	0	0	0.00161436	0.00623111	0	0	0	0	0	0	0	0	0	0.00176367	0.00196198	0	0	0.00795254	0	0	0	0	0.00280749	0	0	0	0	0	0	0	0	0
OTU_847	cryptococcus oeirensis ;k__fungi;p__basidiomycota;c__tremellomycetes;o__filobasidiales;f__filobasidiales;g__cryptococcus;s__cryptococcus oeirensis;superkingdom__eukaryota;subkingdom__dikarya	0	0	0.00187719	0.0123814	0.0168779	0.00270695	0	0	0	0.00113107	0.00332653	0.00375451	0	0.00244016	0	0	0	0.00250441	0	0	0	0	0	0.00070278	0	0	0	0	0	0	0	0	0	0	0	0	0	0	0	0	0	0	0	0	0	0	0	0
OTU_848	___dq104714.1__gi:70888512_ ;k__fungi;p__ascomycota;c__saccharomycetes;o__saccharomycetales;f__pichiaceae;g__pichia;s__pichia sp.;subphylum__saccharomycotina;subkingdom__dikarya;superkingdom__eukaryota	0	0	0.0131404	0	0	0	0	0	0	0	0	0	0	0	0	0	0	0	0	0	0	0	0.00113487	0	0.00722504	0	0	0	0	0	0	0	0	0	0	0	0	0	0	0	0	0	0	0	0	0	0.00519669	0
OTU_849	fungal sp. ksl3 ;k__fungi;p__cryptomycota;c__cryptomycota;o__cryptomycota;f__cryptomycota;g__paramicrosporidium;s__fungal sp.;superkingdom__eukaryota	0	0	0	0	0.00306871	0	0.00331175	0	0	0.00113107	0	0.0012515	0	0	0	0	0	0.00125221	0	0	0	0	0	0	0.00361252	0	0	0	0	0	0	0	0	0	0	0	0.00582305	0	0	0	0	0	0.00183038	0	0	0	0	0
OTU_850	fungal sp. ksl3 ;k__fungi;p__cryptomycota;c__cryptomycota;o__cryptomycota;f__cryptomycota;g__paramicrosporidium;s__fungal sp.;superkingdom__eukaryota	0.0024138	0	0	0.00247629	0.00153435	0	0	0	0	0	0	0.0012515	0	0	0	0	0	0	0.00484308	0	0	0	0	0	0	0	0	0	0	0	0	0	0	0	0	0	0	0	0	0	0	0	0	0.00154938	0	0	0	0.00152828
OTU_851	spirosphaera minuta ;k__fungi;p__ascomycota;c__ascomycota;o__ascomycota;f__ascomycota;g__spirosphaera;s__spirosphaera minuta;superkingdom__eukaryota;subkingdom__dikarya	0	0	0	0	0	0	0	0	0	0	0	0	0	0	0	0	0	0	0	0	0	0	0	0	0.00270939	0	0	0	0	0	0.0156958	0	0	0	0	0	0	0	0	0	0	0	0	0	0	0	0	0.00458484
OTU_852	___aj006678.1__gi:3688533_ ;k__fungi;p__basidiomycota;c__agaricomycetes;o__polyporales;f__polyporaceae;g__skeletocutis;s__skeletocutis kuehneri;subkingdom__dikarya;superkingdom__eukaryota	0	0	0	0	0	0	0	0	0.00458912	0	0	0	0	0	0	0	0	0	0	0	0	0	0	0	0	0.00493648	0	0	0	0	0	0	0	0.00954305	0	0	0	0.00234538	0	0	0	0	0	0	0	0	0	0
OTU_853	___hq871875.1__gi:340343696_ ;k__fungi;p__ascomycota;c__eurotiomycetes;o__chaetothyriales;f__herpotrichiellaceae;g__cladophialophora;s__cladophialophora chaetospira;subclass chaetothyriomycetidae;subphylum__pezizomycotina;subkingdom__dikarya;superkingdom__eukaryota	0	0	0.00187719	0	0	0	0	0	0	0	0.00110884	0	0.00168788	0	0.00575738	0	0	0	0	0	0	0	0	0	0	0	0	0	0	0	0	0	0	0	0	0.00467545	0.000831864	0	0	0	0	0	0.00183038	0	0	0.00217808	0	0
OTU_854	___fm179647.1__gi:252966580_ ;k__fungi;p__basidiomycota;c__tremellomycetes;o__tremellales;f__tremellales;g__cryptococcus;s__cryptococcus sp.;superkingdom__eukaryota;subkingdom__dikarya	0	0	0	0	0	0	0	0	0	0	0	0	0	0	0	0	0	0	0	0	0	0	0	0	0	0	0	0	0	0	0	0	0	0	0	0	0	0	0	0	0	0	0	0	0	0	0	0.00305656
OTU_856	___hq607814.1__gi:312434294_ ;k__fungi;p__ascomycota;c__dothideomycetes;o__botryosphaeriales;f__botryosphaeriaceae;g__botryosphaeria;s__botryosphaeria sp.;subphylum__pezizomycotina;subkingdom__dikarya;superkingdom__eukaryota	0.0012069	0.00561766	0.00375439	0	0	0	0.00165588	0.00147148	0.00305941	0	0	0	0.00168788	0.00244016	0	0	0.00132165	0	0.00161436	0	0.0014658	0.000816633	0	0	0	0	0.00175654	0	0	0	0	0	0.00230808	0	0.00325542	0.00155848	0.000831864	0	0	0	0	0	0	0.00309876	0	0.00435616	0	0.00152828
OTU_857	___hq542913.1__gi:353741780_ ;k__fungi;p__fungi;c__kickxellomycotina;o__kickxellales;f__kickxellaceae;g__ramicandelaber;s__ramicandelaber sp.;superkingdom__eukaryota;subphylum__kickxellomycotina	0.0036207	0.00187255	0	0.00247629	0.00153435	0	0	0	0.00458912	0	0	0	0	0	0.00191913	0.00158929	0.00132165	0.00125221	0.00484308	0	0	0	0	0	0.00270939	0	0	0	0	0	0	0	0.00230808	0	0	0	0.00166373	0.00234538	0	0	0	0	0	0	0	0	0	0
OTU_858	___hm371217.1__gi:302701990_ ;k__fungi;p__ascomycota;c__sordariomycetes;o__sordariales;f__chaetomiaceae;g__humicola;s__humicola sp.;subclass sordariomycetidae;subphylum__pezizomycotina;subkingdom__dikarya;superkingdom__eukaryota	0	0	0	0	0	0	0	0	0	0.00113107	0	0	0	0	0	0	0	0	0	0	0	0	0	0	0	0	0	0.00188882	0	0	0	0	0	0	0	0	0	0	0	0.00464215	0	0	0	0	0	0	0	0
OTU_859	___hq542913.1__gi:353741780_ ;k__fungi;p__fungi;c__kickxellomycotina;o__kickxellales;f__kickxellaceae;g__ramicandelaber;s__ramicandelaber sp.;superkingdom__eukaryota;subphylum__kickxellomycotina	0	0	0	0	0	0	0	0	0	0	0	0	0.00675151	0	0	0	0	0	0.00968617	0	0	0.000816633	0	0	0.00541878	0	0.00175654	0	0	0	0.00196198	0	0	0	0	0	0	0	0	0	0	0	0	0	0	0.00217808	0	0.00152828
OTU_862	incrucipulum radiatum ;k__fungi;p__ascomycota;c__leotiomycetes;o__helotiales;f__hyaloscyphaceae;g__incrucipulum;s__incrucipulum radiatum;subphylum__pezizomycotina;subkingdom__dikarya;superkingdom__eukaryota	0.00482759	0	0	0.00247629	0	0	0.00993526	0.00294295	0	0	0	0	0	0	0.00575738	0	0	0	0	0	0	0	0	0	0	0	0	0	0	0	0	0	0	0	0	0	0	0	0	0	0	0	0.00457595	0	0	0	0	0
OTU_863	___aj617493.1__gi:48596659_ ;k__fungi;p__basidiomycota;c__agaricomycetes;o__agaricales;f__lycoperdaceae;g__calvatia;s__calvatia fragilis;subclass agaricomycetidae;subkingdom__dikarya;superkingdom__eukaryota	0	0	0	0.00247629	0	0	0	0.00147148	0	0	0.00110884	0	0.00168788	0	0	0	0	0	0	0	0.00293161	0	0	0	0	0	0	0	0	0	0.00196198	0	0	0	0.00162771	0	0.00166373	0.00234538	0	0	0.00193442	0	0.000915189	0	0	0.00217808	0	0
OTU_864	___ab113353.1__gi:32328884_ ;k__fungi;p__ascomycota;c__sordariomycetes;o__hypocreales;f__clavicipitaceae;g__pochonia;s__pochonia suchlasporia;varietas pochonia suchlasporia var. catenata;subclass hypocreomycetidae;subphylum__pezizomycotina;subkingdom__dikarya;superkingdom__eukaryota	0.0012069	0	0	0	0	0	0	0	0	0	0	0	0	0	0.00191913	0	0	0	0	0	0	0	0	0	0	0	0	0	0	0	0	0	0.00461617	0	0	0	0.00249559	0	0	0	0	0	0	0.00309876	0	0.00217808	0.00173223	0.00152828
OTU_865	___ab096264.1__gi:25396534_ ;k__fungi;p__ascomycota;c__dothideomycetes;o__pleosporales;f__didymosphaeriaceae;g__paraphaeosphaeria;s__paraphaeosphaeria sp.;suborder__massarineae;subclass pleosporomycetidae;subphylum__pezizomycotina;subkingdom__dikarya;superkingdom__eukaryota	0	0	0	0	0	0	0	0	0	0	0	0	0	0	0.00383826	0	0	0	0	0	0.00293161	0	0	0	0	0	0	0	0	0	0.00196198	0.00286714	0	0	0	0	0.00249559	0	0	0	0	0	0	0	0	0	0	0
OTU_866	___aj608987.1__gi:53125456_ ;k__fungi;p__ascomycota;c__leotiomycetes;o__helotiales;f__leotiaceae;g__halenospora;s__zalerion varium;subphylum__pezizomycotina;subkingdom__dikarya;superkingdom__eukaryota	0	0	0	0	0	0	0	0	0	0	0	0	0	0	0	0	0.00132165	0	0	0	0	0	0.00226974	0	0	0	0	0	0	0	0	0	0	0.00159051	0	0.00155848	0	0	0	0.00116054	0	0	0.000915189	0	0	0	0	0
OTU_867	___aj279445.1__gi:6706190_ ;k__fungi;p__ascomycota;c__saccharomycetes;o__saccharomycetales;f__dipodascaceae;g__galactomyces;s__galactomyces geotrichum;subphylum__saccharomycotina;subkingdom__dikarya;superkingdom__eukaryota	0	0	0	0	0	0	0	0	0	0	0	0	0	0	0	0	0	0	0	0	0	0	0	0	0	0	0	0	0	0	0	0	0	0	0	0	0	0	0	0	0.00967212	0	0	0	0	0	0	0
OTU_869	___hm562211.1__gi:308745283_ ;k__fungi;p__basidiomycota;c__agaricomycetes;o__agaricales;f__pluteaceae;g__volvariella;s__volvariella caesiotincta;subclass agaricomycetidae;subkingdom__dikarya;superkingdom__eukaryota	0	0	0	0	0	0	0	0	0	0	0	0	0	0	0	0	0	0	0	0	0	0	0	0	0	0	0.0245916	0	0	0	0	0	0	0	0	0	0	0	0	0	0	0	0	0	0	0.00217808	0	0
OTU_871	___z48816.1__gi:1771822_ ;k__fungi;p__ascomycota;c__sordariomycetes;o__hypocreales;f__hypocreaceae;g__trichoderma;s__trichoderma hamatum;subclass hypocreomycetidae;subphylum__pezizomycotina;subkingdom__dikarya;superkingdom__eukaryota	0.00482759	0.00187255	0.00187719	0.00247629	0	0.00135347	0.00165588	0.00441443	0.00305941	0.0113107	0.00332653	0.00750901	0.00337576	0.00244016	0.00383826	0.0143037	0.00132165	0.00250441	0.00484308	0.00623111	0.0102606	0.000816633	0.00567434	0	0.00541878	0.00164549	0.0509398	0.00188882	0.00431524	0.00176367	0.00980988	0.0114685	0.00692425	0.00477152	0	0	0.00665491	0.00234538	0.00280749	0	0	0	0.00549114	0.00464814	0.00241499	0	0.00346446	0
OTU_872	___fj664883.1__gi:238058354_ ;k__fungi;p__ascomycota;c__eurotiomycetes;o__verrucariales;f__verrucariaceae;g__verrucaria;s__verrucaria sp.;subclass chaetothyriomycetidae;subphylum__pezizomycotina;subkingdom__dikarya;superkingdom__eukaryota	0	0	0	0	0	0	0	0	0	0	0	0	0	0	0	0	0	0	0	0	0.0014658	0.000816633	0	0	0.00180626	0	0	0	0	0	0.00196198	0.00286714	0	0	0	0	0.000831864	0.00234538	0	0	0	0	0.00183038	0	0	0	0	0.00152828
OTU_873	___ay349125.1__gi:38260287_ ;k__fungi;p__chytridiomycota;c__chytridiomycetes;o__rhizophydiales;f__rhizophydiaceae;g__rhizophydium;s__rhizophydium sp.;superkingdom__eukaryota	0	0	0.00187719	0	0	0	0	0	0	0	0	0	0.00337576	0	0	0	0	0.00125221	0	0	0	0	0	0	0	0	0	0	0	0	0	0	0	0	0	0	0	0	0	0	0	0	0	0	0	0	0	0
OTU_874	___af106892.1__gi:18032142_ ;k__fungi;p__ascomycota;c__pezizomycetes;o__pezizales;f__tuberaceae;g__tuber;s__tuber rufum;subphylum__pezizomycotina;subkingdom__dikarya;superkingdom__eukaryota	0	0	0	0	0	0	0.00165588	0	0	0	0	0	0	0	0	0	0	0	0	0	0	0	0	0	0.0108376	0	0	0	0	0	0	0	0	0	0	0	0	0	0	0	0	0	0	0	0.00241499	0	0	0
OTU_875	dictyosporium sp. 19va07 ;k__fungi;p__ascomycota;c__dothideomycetes;o__pleosporales;f__pleosporales;g__dictyosporium;s__dictyosporium sp.;superkingdom__eukaryota;subkingdom__dikarya;subphylum__pezizomycotina;subclass pleosporomycetidae	0	0.00374511	0	0	0	0.00270695	0.00331175	0	0	0	0	0	0	0	0	0	0	0	0	0	0.0014658	0	0	0	0	0	0	0	0	0	0	0	0	0	0	0	0	0	0	0	0	0	0	0	0.00724498	0	0	0
OTU_876	___gu062204.1__gi:262034938_ ;k__fungi;p__ascomycota;c__dothideomycetes;o__pleosporales;f__sporormiaceae;g__preussia;s__preussia sp.;subclass pleosporomycetidae;subphylum__pezizomycotina;subkingdom__dikarya;superkingdom__eukaryota	0	0	0	0	0	0	0	0	0	0	0	0	0	0	0	0	0	0	0	0	0	0	0	0	0.00090313	0	0.00175654	0	0.00143841	0	0	0	0	0	0	0	0.000831864	0	0	0	0.0154754	0.00812535	0	0	0	0	0	0
OTU_878	___ay667486.1__gi:50313401_ ;k__fungi;p__ascomycota;c__sordariomycetes;o__hypocreales;f__nectriaceae;g__fusarium;s__fusarium oxysporum;subclass hypocreomycetidae;subphylum__pezizomycotina;subkingdom__dikarya;superkingdom__eukaryota	0	0	0.00375439	0	0	0	0.00165588	0	0.00152971	0	0	0	0.00168788	0.00244016	0	0	0.00132165	0	0	0.00311556	0	0.00163327	0	0	0.00090313	0.00164549	0	0	0.00143841	0	0	0	0	0	0.00325542	0.00155848	0	0	0	0	0	0	0.000915189	0.00154938	0	0.00217808	0	0
OTU_879	___jf907991.1__gi:344332950_ ;k__fungi;p__basidiomycota;c__agaricomycetes;o__agaricales;f__tricholomataceae;g__collybia;s__collybia hariolorum;subclass agaricomycetidae;subkingdom__dikarya;superkingdom__eukaryota	0.0012069	0	0.00187719	0	0	0	0	0	0	0	0	0	0.00337576	0	0	0	0	0	0	0.00311556	0	0	0	0	0	0	0	0	0	0	0	0	0	0.00159051	0	0.00155848	0	0	0	0	0	0	0.000915189	0	0	0	0	0
OTU_881	___gu553291.1__gi:292454288_ ;k__fungi;p__ascomycota;c__lecanoromycetes;o__lecanoromycetidae;f__physciaceae;g__rinodina;s__rinodina bischoffii;superkingdom__eukaryota;subkingdom__dikarya;subphylum__pezizomycotina;subclass lecanoromycetidae;suborder__caliciales	0	0	0	0	0	0	0	0	0	0	0	0	0	0	0	0	0	0	0	0	0	0	0	0	0	0	0	0	0	0	0	0	0	0	0	0	0	0	0	0	0	0	0	0	0	0	0	0
OTU_882	cudoniella clavus ;k__fungi;p__ascomycota;c__leotiomycetes;o__helotiales;f__helotiaceae;g__cudoniella;s__cudoniella clavus;subphylum__pezizomycotina;subkingdom__dikarya;superkingdom__eukaryota	0	0	0	0	0	0	0	0	0	0	0	0	0	0.00244016	0	0	0	0	0.00161436	0	0.00293161	0	0	0	0	0	0	0	0	0	0.00196198	0	0	0	0	0	0	0.00234538	0	0	0	0	0	0	0	0	0.00519669	0
OTU_883	___ay997045.1__gi:62866651_ ;k__fungi;p__fungi;c__mucoromycotina;o__endogonales;f__endogonaceae;g__endogone;s__endogone lactiflua;superkingdom__eukaryota;subphylum__mucoromycotina	0	0	0	0	0	0	0	0	0	0	0	0	0	0	0	0	0	0	0	0	0	0	0	0	0.00361252	0	0	0	0	0	0.00196198	0	0	0	0	0	0.00415932	0	0	0	0	0	0	0	0	0	0	0
OTU_885	___hq542912.1__gi:353741779_ ;k__fungi;p__fungi;c__kickxellomycotina;o__kickxellales;f__kickxellaceae;g__ramicandelaber;s__ramicandelaber sp.;superkingdom__eukaryota;subphylum__kickxellomycotina	0.0012069	0.00187255	0	0	0	0	0	0	0.00152971	0	0	0	0	0	0.00191913	0	0	0.00125221	0.00968617	0.00155778	0	0	0	0	0.00270939	0	0.00175654	0	0	0	0.00196198	0	0.00461617	0	0	0	0.00166373	0	0.00280749	0	0	0	0	0	0	0	0	0
OTU_887	___eu873528.1__gi:214014125_ ;k__fungi;p__ascomycota;c__sordariomycetes;o__hypocreomycetidae;f__hypocreomycetidae;g__dendroclathra;s__dendroclathra lignicola;superkingdom__eukaryota;subkingdom__dikarya;subphylum__pezizomycotina;subclass hypocreomycetidae	0.0036207	0	0	0	0	0	0	0	0	0	0	0	0	0	0	0	0	0	0.00322872	0	0	0	0	0	0	0	0	0	0	0	0	0	0	0	0	0.00467545	0	0	0	0	0	0	0.00549114	0	0	0	0	0
OTU_888	___ab096264.1__gi:25396534_ ;k__fungi;p__ascomycota;c__dothideomycetes;o__pleosporales;f__didymosphaeriaceae;g__paraphaeosphaeria;s__paraphaeosphaeria sp.;suborder__massarineae;subclass pleosporomycetidae;subphylum__pezizomycotina;subkingdom__dikarya;superkingdom__eukaryota	0	0	0	0	0	0	0	0.00147148	0	0	0	0	0	0	0.00191913	0	0	0	0	0	0	0	0	0	0.00180626	0	0.00351309	0	0	0	0	0	0.00461617	0	0	0	0.000831864	0	0	0	0	0	0	0	0	0	0	0
OTU_889	___am901693.1__gi:163257628_ ;k__fungi;p__fungi;c__mucoromycotina;o__mucorales;f__mucoraceae;g__mucor;s__mucor sp.;superkingdom__eukaryota;subphylum__mucoromycotina;suborder__mucorineae	0	0	0	0	0	0	0.00165588	0	0	0.00791748	0.0166327	0.00876051	0	0.00244016	0.00191913	0.00317859	0.0026433	0.00125221	0.00161436	0	0	0	0	0.00070278	0	0.00164549	0	0	0.00719207	0	0	0	0	0	0.00162771	0.00467545	0	0	0	0	0	0	0	0	0	0	0	0
OTU_890	___gu062315.1__gi:262035049_ ;k__fungi;p__ascomycota;c__sordariomycetes;o__glomerellales;f__plectosphaerellaceae;g__plectosphaerella;s__plectosphaerella sp.;subclass hypocreomycetidae;subphylum__pezizomycotina;subkingdom__dikarya;superkingdom__eukaryota	0	0	0	0	0	0	0.00827938	0	0	0	0	0	0	0	0	0	0	0	0	0	0	0	0	0	0	0	0	0	0	0	0	0	0	0	0	0	0	0	0	0	0	0	0.0183038	0	0	0	0	0
OTU_891	___fj903326.1__gi:237641545_ ;k__fungi;p__ascomycota;c__lecanoromycetes;o__lecanoromycetes;f__lecanoromycetes;g__sarea;s__sarea sp.;superkingdom__eukaryota;subkingdom__dikarya;subphylum__pezizomycotina	0	0	0	0	0	0	0.00496763	0	0	0	0	0	0	0.00244016	0	0	0	0	0	0.00155778	0	0	0	0	0	0	0	0	0	0	0	0.00286714	0	0	0	0	0	0	0	0	0	0	0	0	0	0	0	0.00152828
OTU_892	mortierella sp. 07ma06 ;k__fungi;p__fungi;c__mortierellomycotina;o__mortierellales;f__mortierellaceae;g__mortierella;s__mortierella sp.;superkingdom__eukaryota;subphylum__mortierellomycotina	0	0.00374511	0.00375439	0	0.00153435	0	0	0.00147148	0.00305941	0	0.00110884	0	0	0	0.00191913	0	0	0	0	0	0	0	0	0	0.00180626	0	0	0	0.00143841	0	0	0	0	0	0	0	0.00166373	0	0.00280749	0	0	0	0	0.00154938	0	0	0	0
OTU_893	fusarium solani ;k__fungi;p__ascomycota;c__sordariomycetes;o__hypocreales;f__nectriaceae;g__fusarium;s__fusarium solani;subclass hypocreomycetidae;subphylum__pezizomycotina;subkingdom__dikarya;superkingdom__eukaryota	0	0	0	0	0	0	0	0	0	0	0	0	0	0	0	0	0	0	0	0	0	0	0.00113487	0	0.00090313	0	0	0.00188882	0	0	0.00392395	0	0	0	0	0	0.000831864	0	0	0.00116054	0	0	0	0	0	0	0.00346446	0
OTU_895	___ef584542.1__gi:148283535_ ;k__fungi;p__ascomycota;c__saccharomycetes;o__saccharomycetales;f__trichomonascaceae;g__blastobotrys;s__blastobotrys proliferans;subphylum__saccharomycotina;subkingdom__dikarya;superkingdom__eukaryota	0.0012069	0.00187255	0.00375439	0	0	0	0.00165588	0.00147148	0	0	0	0.002503	0.00168788	0	0.00191913	0	0	0	0	0	0	0	0.00113487	0	0.00090313	0	0.00175654	0.0679977	0	0	0	0	0	0	0	0	0	0	0	0	0	0.00135422	0.00366076	0	0.00482998	0	0.00173223	0
OTU_897	___ay999127.1__gi:67644102_ ;k__fungi;p__ascomycota;c__sordariomycetes;o__sordariales;f__lasiosphaeriaceae;g__podospora;s__podospora didyma;subclass sordariomycetidae;subphylum__pezizomycotina;subkingdom__dikarya;superkingdom__eukaryota	0	0	0	0	0	0	0	0.00147148	0	0	0	0	0.00675151	0	0	0	0	0.00125221	0	0	0	0	0	0	0	0	0	0.00188882	0	0.00176367	0	0	0	0	0.00325542	0	0	0.00703614	0	0	0	0	0	0	0	0	0	0
OTU_898	___ay557369.1__gi:45454378_ ;k__fungi;p__ascomycota;c__leotiomycetes;o__leotiomycetes;f__leotiomycetes;g__scytalidium;s__scytalidium cuboideum;superkingdom__eukaryota;subkingdom__dikarya;subphylum__pezizomycotina	0	0.00561766	0	0	0	0	0	0	0.00458912	0	0	0	0	0	0	0	0	0	0	0	0.00586321	0	0	0	0	0	0	0	0	0.00176367	0.00196198	0	0	0	0	0.00155848	0	0.00234538	0	0	0	0	0	0.00309876	0.00241499	0	0	0
OTU_900	___ay667486.1__gi:50313401_ ;k__fungi;p__ascomycota;c__sordariomycetes;o__hypocreales;f__nectriaceae;g__fusarium;s__fusarium oxysporum;subclass hypocreomycetidae;subphylum__pezizomycotina;subkingdom__dikarya;superkingdom__eukaryota	0.0012069	0	0	0	0	0	0	0	0	0.00113107	0	0.0012515	0.00168788	0	0.00191913	0	0	0.00125221	0	0	0	0.00163327	0	0	0	0	0.00175654	0.00377765	0	0.00176367	0	0	0	0	0	0	0	0	0	0	0	0	0	0	0	0	0	0
OTU_902	___eu352771.1__gi:164421752_ ;k__fungi;p__chytridiomycota;c__chytridiomycetes;o__lobulomycetales;f__lobulomycetaceae;g__lobulomyces;s__lobulomyces poculatus;superkingdom__eukaryota	0	0	0	0	0	0	0	0.00294295	0.00611883	0	0	0	0	0	0	0	0	0	0	0	0	0	0	0	0	0	0	0	0	0	0	0	0	0	0	0	0	0	0	0	0	0	0	0	0	0	0	0
OTU_903	mortierella sp. 12nj01 ;k__fungi;p__fungi;c__mortierellomycotina;o__mortierellales;f__mortierellaceae;g__mortierella;s__mortierella sp.;superkingdom__eukaryota;subphylum__mortierellomycotina	0.0193104	0.0411962	0.0131404	0.0198103	0.0122748	0.0203021	0.0115911	0.0294295	0.0642477	0.0927476	0.0632041	0.161444	0.0354454	0.0170811	0.0326252	0.20343	0.0251113	0.0826457	0.0306729	0.0545222	0.0366451	0.00653307	0.0204276	0	0.020772	0.0181004	0.0175654	0.0245547	0.00431524	0.00352734	0.0137338	0.0344056	0.00692425	0.00159051	0.00488313	0.00311696	0.0257878	0.0422169	0.0449198	0.00348161	0	0.00270845	0.0237949	0.0433826	0.0241499	0.0217808	0.0536992	0.0641878
OTU_904	___hq630352.1__gi:325516925_ ;k__fungi;p__fungi;c__mortierellomycotina;o__mortierellales;f__mortierellaceae;g__mortierella;s__mortierella beljakovae;superkingdom__eukaryota;subphylum__mortierellomycotina	0	0	0	0.00247629	0	0	0.00165588	0	0	0	0	0	0	0	0	0	0	0	0	0	0	0	0	0	0.00541878	0	0	0	0	0	0	0	0	0	0	0	0	0	0	0	0	0	0.000915189	0	0	0	0	0
OTU_905	fungal sp. ksl3 ;k__fungi;p__cryptomycota;c__cryptomycota;o__cryptomycota;f__cryptomycota;g__paramicrosporidium;s__fungal sp.;superkingdom__eukaryota	0	0.00187255	0	0	0	0	0	0	0	0	0	0	0	0	0	0	0	0	0	0	0	0	0	0	0	0.00493648	0	0	0	0	0	0	0	0.00159051	0	0	0	0	0	0	0	0	0	0	0	0	0	0
OTU_906	___dq643977.1__gi:104530395_ ;k__fungi;p__basidiomycota;c__tremellomycetes;o__filobasidiales;f__filobasidiales;g__cryptococcus;s__cryptococcus sp.;superkingdom__eukaryota;subkingdom__dikarya	0	0	0	0.00247629	0	0	0	0	0	0	0.00110884	0	0	0	0	0	0	0	0	0	0	0	0.00226974	0.00210834	0	0	0	0	0	0.0141093	0	0	0	0	0	0	0	0	0	0	0	0.00270845	0	0	0	0	0	0
OTU_907	___ay667486.1__gi:50313401_ ;k__fungi;p__ascomycota;c__sordariomycetes;o__hypocreales;f__nectriaceae;g__fusarium;s__fusarium oxysporum;subclass hypocreomycetidae;subphylum__pezizomycotina;subkingdom__dikarya;superkingdom__eukaryota	0.0012069	0	0	0	0	0	0.00331175	0	0.00152971	0.00226214	0.00110884	0.0012515	0.00168788	0.00244016	0.00191913	0	0.0026433	0.00250441	0	0.00155778	0.00439741	0.000816633	0.00113487	0	0.00180626	0	0	0.00188882	0	0	0.00196198	0	0	0.00159051	0	0	0	0	0	0.00232107	0	0	0.000915189	0	0.00482998	0.00217808	0	0.00152828
OTU_909	___jf735260.1__gi:345447603_ ;k__fungi;p__ascomycota;c__sordariomycetes;o__hypocreales;f__nectriaceae;g__ilyonectria;s__ilyonectria coprosmae;subclass hypocreomycetidae;subphylum__pezizomycotina;subkingdom__dikarya;superkingdom__eukaryota	0.0024138	0	0	0	0	0.00135347	0	0.00147148	0	0	0.00110884	0	0	0	0.00191913	0.00158929	0	0	0	0.00311556	0	0.000816633	0	0	0	0.00164549	0	0	0.00143841	0	0	0	0	0	0	0	0.00166373	0	0	0.00116054	0	0	0	0	0	0.00217808	0.00173223	0.00152828
OTU_910	pseudeurotium sp. 01nh01 ;k__fungi;p__ascomycota;c__leotiomycetes;o__leotiomycetes;f__pseudeurotiaceae;g__pseudeurotium;s__pseudeurotium sp.;superkingdom__eukaryota;subkingdom__dikarya;subphylum__pezizomycotina	0.0024138	0	0	0	0	0	0	0	0	0	0	0	0	0	0	0	0.00132165	0	0	0	0	0	0.00113487	0	0	0	0	0	0	0	0	0	0	0	0	0	0.00249559	0	0	0	0	0	0	0	0	0	0	0
OTU_911	___ab096264.1__gi:25396534_ ;k__fungi;p__ascomycota;c__dothideomycetes;o__pleosporales;f__didymosphaeriaceae;g__paraphaeosphaeria;s__paraphaeosphaeria sp.;suborder__massarineae;subclass pleosporomycetidae;subphylum__pezizomycotina;subkingdom__dikarya;superkingdom__eukaryota	0	0	0	0	0	0	0	0	0	0	0	0	0	0	0.00191913	0	0	0	0	0	0	0	0	0	0.00180626	0	0	0	0	0	0.00196198	0.00286714	0	0	0	0	0	0	0	0	0	0	0	0	0	0	0	0
OTU_912	___dq189222.1__gi:76150856_ ;k__fungi;p__ascomycota;c__saccharomycetes;o__saccharomycetales;f__dipodascaceae;g__galactomyces;s__galactomyces geotrichum;subphylum__saccharomycotina;subkingdom__dikarya;superkingdom__eukaryota	0	0	0	0	0	0	0	0	0	0	0	0	0	0	0	0	0	0	0	0	0	0	0	0	0	0	0	0	0	0	0	0	0	0	0	0	0	0	0	0	0.00193442	0	0	0	0	0	0	0
OTU_913	___fj892749.1__gi:227344124_ ;k__fungi;p__ascomycota;c__ascomycota;o__ascomycota;f__ascomycota;g__petrakia;s__petrakia sp.;superkingdom__eukaryota;subkingdom__dikarya	0	0	0.00187719	0	0.00306871	0	0	0	0	0	0	0	0	0	0	0	0	0	0	0	0	0	0	0	0	0	0	0	0	0	0	0	0	0	0	0	0	0.00703614	0	0	0	0	0	0.00774689	0	0	0	0
OTU_916	pluteus romellii ;k__fungi;p__basidiomycota;c__agaricomycetes;o__agaricales;f__pluteaceae;g__pluteus;s__pluteus romellii;subclass agaricomycetidae;subkingdom__dikarya;superkingdom__eukaryota	0.0012069	0	0	0	0	0	0	0	0	0	0.00110884	0	0.00168788	0	0	0	0	0	0	0	0	0	0	0	0	0	0	0	0	0	0	0	0	0	0	0	0	0	0	0	0	0	0	0	0	0	0.00173223	0
OTU_918	___dq404385.1__gi:89674432_ ;k__fungi;p__basidiomycota;c__agaricomycetes;o__phallales;f__phallaceae;g__phallus;s__phallus hadriani;subclass phallomycetidae;subkingdom__dikarya;superkingdom__eukaryota	0.0024138	0	0	0	0	0	0	0	0	0.00113107	0	0	0	0	0	0	0	0	0	0	0.0117264	0	0	0	0	0	0	0	0	0	0	0	0	0	0	0	0.000831864	0	0.00561498	0	0	0	0	0	0	0	0	0
OTU_919	___hq599425.1__gi:319976335_ ;k__fungi;p__ascomycota;c__dothideomycetes;o__pleosporales;f__massariaceae;g__massaria;s__massaria pyri;subclass pleosporomycetidae;subphylum__pezizomycotina;subkingdom__dikarya;superkingdom__eukaryota	0	0	0	0	0	0	0	0	0	0	0.00110884	0	0	0	0	0	0	0	0	0	0.0014658	0	0	0	0	0	0	0.00188882	0	0	0	0	0	0	0	0	0.000831864	0	0	0	0	0	0	0.00929627	0	0	0	0
OTU_920	geomyces sp. 02nh05 ;k__fungi;p__ascomycota;c__leotiomycetes;o__leotiomycetes;f__pseudeurotiaceae;g__geomyces;s__geomyces sp.;superkingdom__eukaryota;subkingdom__dikarya;subphylum__pezizomycotina	0	0	0	0	0	0	0	0	0	0	0	0	0	0	0	0	0	0	0	0	0.0014658	0	0	0	0	0	0	0	0	0.00176367	0	0	0	0.00318102	0	0.00155848	0.000831864	0	0	0	0	0	0	0	0.00241499	0	0	0
OTU_921	___af193389.1__gi:6467882_ ;k__fungi;p__basidiomycota;c__agaricomycetes;o__thelephorales;f__typhulaceae;g__typhula;s__typhula sp.;subkingdom__dikarya;superkingdom__eukaryota	0	0	0	0.017334	0.124283	0.00676737	0	0.00147148	0	0	0	0	0	0	0.00191913	0	0	0	0	0	0	0	0	0	0	0	0	0	0	0	0	0	0	0	0	0	0	0	0	0.00116054	0	0	0	0	0	0	0	0
OTU_922	___ay667486.1__gi:50313401_ ;k__fungi;p__ascomycota;c__sordariomycetes;o__hypocreales;f__nectriaceae;g__fusarium;s__fusarium oxysporum;subclass hypocreomycetidae;subphylum__pezizomycotina;subkingdom__dikarya;superkingdom__eukaryota	0	0.00374511	0.00375439	0	0	0	0.00165588	0.00294295	0.00458912	0	0.00332653	0.0012515	0	0.00244016	0	0.00158929	0.00132165	0.00500883	0	0.00155778	0	0	0.00113487	0	0	0.00164549	0	0	0	0.00176367	0	0	0	0	0.00162771	0.00467545	0.000831864	0.00234538	0.00280749	0.00116054	0	0	0.000915189	0.00309876	0.00482998	0.00217808	0	0
OTU_924	___ab540570.1__gi:310687467_ ;k__fungi;p__ascomycota;c__ascomycota;o__ascomycota;f__ascomycota;g__acremonium;s__acremonium brachypenium;superkingdom__eukaryota;subkingdom__dikarya	0	0.00187255	0.00375439	0	0	0	0	0	0	0	0	0	0	0	0	0	0	0	0	0.00311556	0.0014658	0	0	0	0	0	0	0	0.00287683	0	0	0.00286714	0	0	0	0.00935089	0	0	0	0	0	0	0	0	0	0	0	0.00152828
OTU_925	___hq888720.1__gi:321173739_ ;k__fungi;p__blastocladiomycota;c__blastocladiomycetes;o__blastocladiales;f__blastocladiaceae;g__allomyces;s__allomyces javanicus;superkingdom__eukaryota	0	0	0	0	0	0	0	0.00882885	0	0	0	0	0	0	0	0	0	0	0	0	0	0	0	0	0	0	0	0	0	0	0	0.00286714	0	0	0	0	0	0	0	0	0	0	0	0	0.00482998	0	0	0.0076414
OTU_927	___gu062202.1__gi:262034936_ ;k__fungi;p__ascomycota;c__sordariomycetes;o__coniochaetales;f__coniochaetaceae;g__coniochaeta;s__lecythophora sp.;subclass sordariomycetidae;subphylum__pezizomycotina;subkingdom__dikarya;superkingdom__eukaryota	0	0.00187255	0	0	0	0	0.00496763	0	0	0	0	0	0	0	0	0	0	0	0.00161436	0	0	0.000816633	0.00113487	0	0	0	0	0.00566647	0	0	0	0	0	0	0	0	0	0	0	0	0.00193442	0	0	0	0	0	0	0
OTU_928	___hm562082.1__gi:308745154_ ;k__fungi;p__basidiomycota;c__agaricomycetes;o__agaricales;f__pluteaceae;g__pluteus;s__pluteus longistriatus;subclass agaricomycetidae;subkingdom__dikarya;superkingdom__eukaryota	0	0	0	0	0	0	0.00331175	0	0	0	0	0	0	0	0	0	0	0	0	0.00155778	0	0	0	0	0	0	0	0	0	0	0	0	0	0	0	0	0	0	0	0	0	0	0.00274557	0	0	0.00435616	0	0
OTU_929	fungal sp. ksl3 ;k__fungi;p__cryptomycota;c__cryptomycota;o__cryptomycota;f__cryptomycota;g__paramicrosporidium;s__fungal sp.;superkingdom__eukaryota	0	0	0	0	0	0	0	0	0	0	0	0	0	0	0	0	0	0	0	0	0	0	0	0	0	0	0	0	0	0	0	0	0	0	0	0	0	0	0	0	0	0	0.000915189	0	0.00241499	0	0	0
OTU_930	___hm119487.1__gi:298504059_ ;k__fungi;p__basidiomycota;c__agaricomycetes;o__agaricales;f__lyophyllaceae;g__lyophyllum;s__lyophyllum connatum;subclass agaricomycetidae;subkingdom__dikarya;superkingdom__eukaryota	0	0	0.00375439	0	0	0	0	0	0	0	0	0	0	0	0	0	0	0	0	0	0	0	0	0	0.00361252	0.00329099	0	0	0	0	0.00196198	0	0	0	0	0	0	0	0	0	0	0	0	0	0	0	0	0
OTU_931	guehomyces pullulans ;k__fungi;p__basidiomycota;c__tremellomycetes;o__cystofilobasidiales;f__cystofilobasidiaceae;g__guehomyces;s__guehomyces pullulans;subkingdom__dikarya;superkingdom__eukaryota	0	0.00187255	0	0	0	0.00135347	0	0	0	0	0	0	0	0	0	0	0	0	0	0	0.0014658	0	0	0	0	0	0	0	0	0	0	0	0	0	0	0.00155848	0	0.00234538	0	0	0	0	0	0	0	0	0	0
OTU_932	exophiala sp. nh512 ;k__fungi;p__ascomycota;c__eurotiomycetes;o__chaetothyriales;f__herpotrichiellaceae;g__exophiala;s__exophiala sp.;subclass chaetothyriomycetidae;subphylum__pezizomycotina;subkingdom__dikarya;superkingdom__eukaryota	0.0012069	0.00374511	0	0.00247629	0	0	0	0.00147148	0	0	0	0.0012515	0	0	0.00191913	0	0	0	0	0	0	0	0	0	0.00812817	0	0.00175654	0	0	0	0	0	0	0	0	0	0	0	0	0	0	0	0.000915189	0	0	0	0	0
OTU_933	___ab032675.1__gi:7262469_ ;k__fungi;p__basidiomycota;c__tremellomycetes;o__filobasidiales;f__filobasidiales;g__cryptococcus;s__cryptococcus fuscescens;superkingdom__eukaryota;subkingdom__dikarya	0.0036207	0	0	0	0	0	0	0	0	0	0	0	0.013503	0	0	0	0	0	0	0	0	0	0	0	0	0	0	0	0	0	0	0	0	0	0	0	0	0	0	0	0	0	0	0	0	0	0	0
OTU_934	sporothrix inflata ;k__fungi;p__ascomycota;c__sordariomycetes;o__ophiostomatales;f__ophiostomataceae;g__sporothrix;s__sporothrix inflata;subclass sordariomycetidae;subphylum__pezizomycotina;subkingdom__dikarya;superkingdom__eukaryota	0	0	0	0	0	0	0	0	0	0	0	0	0	0	0	0	0	0	0	0	0	0	0	0	0	0	0	0	0.00431524	0	0	0.00573427	0.00230808	0.00159051	0	0	0	0	0.00561498	0	0	0	0	0	0	0	0	0
[truncated: 1,674 more rows]
[truncated: 78 more columns]

## Sheet: Fungi_OTU_Counts
otu name	Taxonomy				Percent Homology	evalue	bitscore	homology extract gibbsfree_otu/gibbsfree_homolog	total length gibbsfree_otu/otu_lenth/gibbsfree_homolog/homolog_length	0NAC.G1	0NAC.G2	0NAC.G3	0GR.G1	0GR.G2	0GR.G3	1NAC.G1	1NAC.G2	1NAC.G3	1GR.G1	1GR.G2	1GR.G3	3NAC.G1	3NAC.G2	3NAC.G3	3GR.G1	3GR.G2	3GR.G3	7NAC.G1	7NAC.G2	7NAC.G3	7GR.G1	7GR.G2	7GR.G3	15NAC.G1	15NAC.G2	15NAC.G3	15GR.G1	15GR.G2	15GR.G3	21NAC.G1	21NAC.G2	21NAC.G3	21GR.G1	21GR.G2	21GR.G3	31NAC.G1	31NAC.G2	31NAC.G3	31GR.G1
[truncated: 2,451 more rows]
[truncated: 86 more columns]

[truncated: 2 more sheets: Bacteria_OTU_Percentages, Bacteria_OTU_Counts]
